# Supplementary material for: Palladium-catalyzed 1,1-alkynylbromination of alkenes with alkynyl bromides
Source: Royal Society of Chemistry journal article supplement (doi:10.1039/d1sc02873a), 2021-01-01

**Supplementary Information**

**Palladium-catalyzed 1,1-alkynylbromination of alkenes with  
alkynyl bromides**

Yusuke Ano,<sup>\*,†</sup> Natsuki Kawai, and Naoto Chatani

*Department of Applied Chemistry, Faculty of Engineering, Osaka University, Suita, Osaka 565-0871,  
Japan*

*<sup>†</sup>Center for Atomic and Molecular Technologies, Graduate School of Engineering, Osaka University,  
Suita, Osaka 565-0871, Japan*

*ano@chem.eng.osaka-u.ac.jp*

## Table of Contents

|                                                                                                  |         |
|--------------------------------------------------------------------------------------------------|---------|
| 1. General Information                                                                           | S3      |
| 2. Materials                                                                                     | S3      |
| 3. Preparation of the Deuterated Substrates                                                      | S3–S4   |
| 4. General Procedure for the Pd-Catalyzed 1,1-Alkynylbromination of Alkenes                      | S4      |
| 5. Screening of Reaction Conditions                                                              | S5      |
| 6. Characterization of Products                                                                  | S6–S12  |
| 7. Large-Scale Preparation of <b>3a</b>                                                          | S12     |
| 8. Removal of Triisopropylsilyl Group                                                            | S12     |
| 9. Mechanistic Studies                                                                           | S12–S24 |
| 10. Computational Studies                                                                        | S25–S42 |
| 11. References                                                                                   | S42–S43 |
| 12. Copies of $^1\text{H}$ , $^{13}\text{C}$ , $^{11}\text{B}$ , and $^{19}\text{F}$ NMR Spectra | S44–S77 |

## 1. General Information

$^1\text{H}$ ,  $^2\text{H}$ ,  $^{11}\text{B}$ ,  $^{13}\text{C}$ , and  $^{19}\text{F}$  NMR spectra were recorded on a JEOL ECS-400 or ECZ-400 spectrometer. The chemical shifts in  $^1\text{H}$  NMR spectra were recorded relative to tetramethylsilane ( $\delta$ : 0.0). The chemical shifts in  $^2\text{H}$  NMR spectra were recorded relative to  $\text{CDCl}_3$  ( $\delta$ : 7.26). The chemical shifts in  $^{13}\text{C}$  NMR spectra were recorded relative to  $\text{CDCl}_3$  ( $\delta$ : 77.0). The chemical shifts in  $^{11}\text{B}$  NMR spectra were recorded relative to  $\text{BF}_3\cdot\text{OEt}_2$  ( $\delta$ : 0.0). The chemical shifts in  $^{19}\text{F}$  NMR spectra were recorded relative to  $\text{CFCl}_3$  ( $\delta$ : 0.0). Data are recorded as follows: chemical shifts in ppm ( $\delta$ ), multiplicity (s = singlet, d = doublet, t = triplet, q = quartet, br = broad singlet, sep = septet, m = multiplet, c = complex), coupling constant (Hz), and integration. Infrared spectra (IR) were recorded on a JASCO FT/IR-4000 spectrometer using the ATR method. Absorption data are reported in reciprocal centimeters from 800 to  $3500\text{ cm}^{-1}$  with the following relative intensities: s (strong), m (medium), or w (weak). Mass spectra were obtained using a SHIMADZU QP-2020NX spectrometer or a JEOL JMS-700 spectrometer with a quadrupole mass analyzer at 70 eV. Data were recorded as follows: mass/charge ratio ( $m/z$ ) and relative intensity to the base peak at 100 %. High-resolution mass spectra (HRMS) were obtained using a JEOL JMS-T100LP spectrometer with a time-of-flight mass analyzer. Melting points were determined on a Stanford Research Systems MPA100 apparatus equipped with a digital thermometer and are uncorrected. Preparative gel permeation chromatography (GPC) were carried out on a JAI LC-5060 equipped with two JAIGEL-2HR columns connected in series or two JAIGEL-2HR-40 columns connected in series. Medium-pressure liquid chromatography (MPLC) was performed with a Biotage Isolera<sup>®</sup> equipped with Biotage<sup>®</sup> Sfar Silica HC chromatography cartridges connected in series. High-pressure liquid chromatography (HPLC) was performed with a SHIMADZU LC-20AR equipped with a SHIMADZU SPD-20A (UV Detector,  $\lambda = 254\text{ nm}$ ) and Phenomenex Luna<sup>®</sup> Silica ( $5\ \mu\text{m}$ ,  $210 \times 21.2\text{ mm}$ ).

## 2. Materials

All commercially available alkenes (**1a-1p**, **1r**, **1z**, **1aa**, **1ac**, **1ad**) were purchased from Sigma-Aldrich, TCI, Combi-Blocks, FUJIFILM Wako, Alfa Aesar, or BLD pharma. Alkenes **1q**,<sup>1</sup> **1s**,<sup>2</sup> **1t**,<sup>3</sup> **1u**,<sup>2</sup> **1v**,<sup>4</sup> **1w**,<sup>5</sup> **1x**,<sup>6</sup> **1y**,<sup>7</sup> **1ab**,<sup>8</sup> **1ae**,<sup>9</sup>  $[\text{D}_1]\text{-1a}$ ,<sup>10</sup> and  $\alpha\text{-}[\text{D}_1]\text{-1s}$ <sup>10</sup> were prepared according to the previously reported procedures. All of the alkenes were distilled over  $\text{CaH}_2$  or recrystallized prior to use. The alkynyl bromide **2** was prepared according to a previously reported procedure and purified by distillation over  $\text{CaH}_2$ .<sup>11</sup> Toluene (super dehydrated) was purchased from Kanto Chemicals and was used as received.  $\text{Pd}(\text{OAc})_2$  were purchased from FUJIFILM Wako and used as received.

## 3. Preparation of the Deuterated Substrates

### Preparation of $[\text{D}_2]\text{-1a}$ .

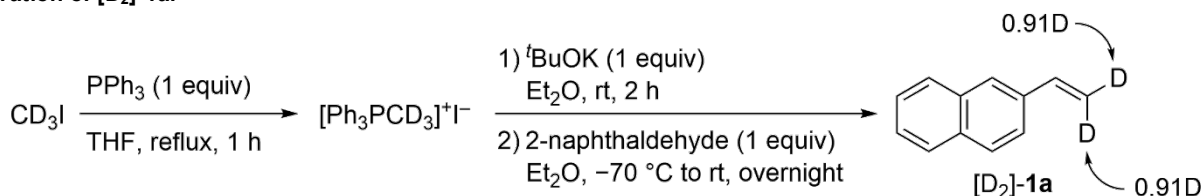

The deuterated 2-vinylnaphthalene- $d_2$  ( $[\text{D}_2]\text{-1a}$ , CASRN: 1308650-67-0) was prepared from 2-naphthaldehyde (937.1 mg, 6.0 mmol) by referring to the reported procedure for the synthesis of 4-*tert*-butylstyrene- $d_2$ .<sup>12</sup> The crude material was purified by column chromatography on silica gel (eluent: hexane,  $R_f = 0.40$ ) to afford  $[\text{D}_2]\text{-1a}$  as a white powder (834.5 mg, 89%). Spectral data are consistent with those reported in the literature.<sup>13</sup>

$^1\text{H}$  NMR (400 MHz,  $\text{CDCl}_3$ ):  $\delta$  7.83–7.78 (c, 3H), 7.75 (s, 1H), 7.65 (dd,  $J = 8.6, 1.6\text{ Hz}$ , 1H), 7.49–7.42 (c, 2H), 6.88 (br, 1H), 5.87 (d,  $J = 17.6\text{ Hz}$ , 0.09H), 5.33 (d,  $J = 10.9\text{ Hz}$ , 0.09H).  $^{13}\text{C}$  NMR (101 MHz,  $\text{CDCl}_3$ ):  $\delta$  136.7, 134.9, 133.5, 133.1, 128.1, 128.0, 127.6, 126.4, 126.2, 125.9, 123.1, 114.1–113.6 (m). MS (EI, relative intensity, %)  $m/z$ : 157 (12,  $[\text{M} + 1]^+$ ), 156 (100,  $\text{M}^+$ ), 155 (86), 154 (53), 153 (30), 152 (13), 129 (11), 128 (10), 77 (20).

### Preparation of $(E)\text{-}[\text{D}_1]\text{-1s}$ .

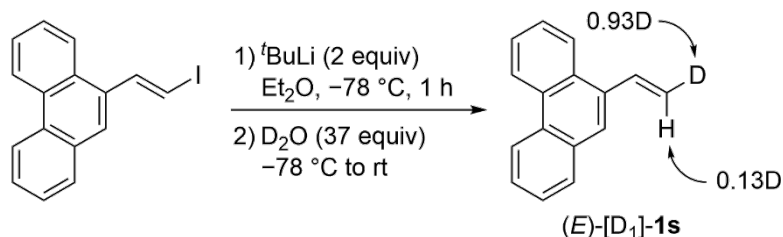

To a solution of  $(E)\text{-}9\text{-}(2\text{-iodovinyl})\text{phenanthrene}$ <sup>14</sup> (1 mmol) in  $\text{Et}_2\text{O}$  (20 mL), a solution of  $^t\text{BuLi}$  (1.6 M in pentane, 1.25 mL, 2 mmol)

was slowly added via a syringe at  $-78\text{ }^{\circ}\text{C}$ , and the reaction mixture was stirred at the same temperature. After 1 h,  $\text{D}_2\text{O}$  (99.8% D, 0.75 mL, 37 mmol) was slowly added to the mixture via a syringe, and the stirring was continued with the temperature being allowed to warm to room temperature. The resulting mixture was extracted with  $\text{Et}_2\text{O}$  ( $3 \times 10\text{ mL}$ ), and the combined organic layers were washed with sat. aq.  $\text{Na}_2\text{S}_2\text{O}_3$  (10 mL) and brine (10 mL) and dried over  $\text{Na}_2\text{SO}_4$ . After concentration under the reduced pressure, the resulting crude mixture was purified by silica gel column chromatography (eluent: hexane,  $R_f = 0.51$ ) and subsequent preparative GPC (eluent:  $\text{CHCl}_3$ ) to give (*E*)-[D1]-**1s** as a colorless solid (184.9 mg, 90% yield).

$^1\text{H}$  NMR (400 MHz,  $\text{CDCl}_3$ ):  $\delta$  8.74–8.71 (m, 1H), 8.67–8.64 (m, 1H), 8.17–8.14 (m, 1H), 7.90–7.87 (m, 1H), 7.84 (s, 1H), 7.69–7.56 (c, 4H), 7.47 (d,  $J = 16.9\text{ Hz}$ , 1H), 5.85 (d,  $J = 17.2\text{ Hz}$ , 0.87H), 5.51 (d,  $J = 10.8\text{ Hz}$ , 0.07H).  $^{13}\text{C}$  NMR (101 MHz,  $\text{CDCl}_3$ ):  $\delta$  135.1, 134.8, 131.9, 130.7, 130.5, 130.4, 128.8, 126.9, 126.8, 126.7, 126.6, 124.8, 123.2, 122.7, 117.4 (t,  $J = 24.6\text{ Hz}$ ) (one signal is obscured by overlap with another signal). MS (EI, relative intensity, %)  $m/z$ : 206 (15,  $[\text{M} + 1]^+$ ), 205 (95,  $\text{M}^+$ ), 204 (100), 203 (64), 202 (20), 201 (13). HRMS (DART)  $m/z$ :  $[\text{M} + \text{H}]^+$  Calcd for  $\text{C}_{16}\text{H}_{12}\text{D}$  206.10745; Found 206.10796.

#### Preparation of (*Z*)-[D<sub>1</sub>]-**1s**.

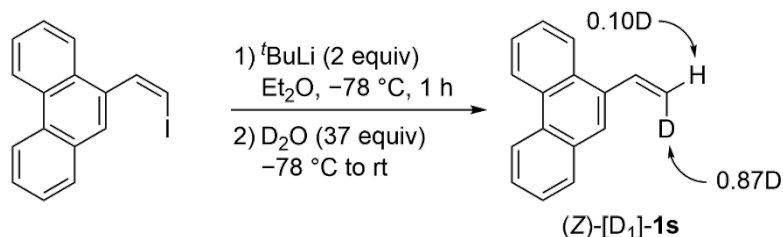

To a solution of (*Z*)-9-(2-iodovinyl)phenanthrene<sup>15</sup> (1 mmol) in  $\text{Et}_2\text{O}$  (20 mL), a solution of  $t\text{BuLi}$  (1.6 M in pentane, 1.25 mL, 2 mmol) was slowly added via a syringe at  $-78\text{ }^{\circ}\text{C}$ , and the reaction mixture was stirred at the same temperature. After 1 h,  $\text{D}_2\text{O}$  (99.8% D, 0.75 mL, 37 mmol) was slowly added to the mixture via a syringe, and the stirring was continued with the temperature being allowed to warm to room temperature. The resulting mixture was extracted with  $\text{Et}_2\text{O}$  ( $3 \times 10\text{ mL}$ ), and the combined organic layers were washed with sat. aq.  $\text{Na}_2\text{S}_2\text{O}_3$  (10 mL) and brine (10 mL) and dried over  $\text{Na}_2\text{SO}_4$ . After concentration under the reduced pressure, the resulting crude mixture was purified by silica gel column chromatography (eluent: hexane,  $R_f = 0.52$ ) and subsequent preparative GPC (eluent:  $\text{CHCl}_3$ ) to give (*Z*)-[D1]-**1s** as a pale yellow solid (89.6 mg, 43% yield).

$^1\text{H}$  NMR (400 MHz,  $\text{CDCl}_3$ ):  $\delta$  8.69–8.65 (m, 1H), 8.60 (d,  $J = 8.0\text{ Hz}$ , 1H), 8.13–8.10 (m, 1H), 7.86–7.83 (m, 1H), 7.80 (s, 1H), 7.65–7.52 (c, 4H), 7.47–7.39 (m, 1H), 5.87–5.79 (c, 0.13H), 5.51–5.46 (c, 0.90H).  $^{13}\text{C}$  NMR (101 MHz,  $\text{CDCl}_3$ ):  $\delta$  135.1, 134.8, 131.9, 130.7, 130.5, 130.4, 128.8, 126.9, 126.8, 126.7, 126.6, 124.8, 123.2, 122.6, 117.4 (t,  $J = 23.6\text{ Hz}$ ) (one signal is obscured by overlap with another signal). MS (EI, relative intensity, %)  $m/z$ : 205 (83,  $\text{M}^+$ ), 204 (100), 203 (70), 202 (28), 201 (13). HRMS (DART)  $m/z$ :  $[\text{M} + \text{H}]^+$  Calcd for  $\text{C}_{16}\text{H}_{12}\text{D}$  206.10745; Found 206.10763.

#### 4. General Procedure for the Pd-Catalyzed 1,1-Alkynylbromination of Alkenes

$\text{Pd}(\text{OAc})_2$  (0.7 mg, 0.03 mmol, 10 mol%), (bromoethynyl)triisopropylsilane **2** (94 mg, 0.36 mmol, 1.2 equiv), alkene **1** (0.3 mmol, 1 equiv) and toluene (1 mL) were successively added to a 10 mL-sample vial equipped with a Teflon-sealed screwcap under air or  $\text{N}_2$ . After stirring the mixture at  $75\text{ }^{\circ}\text{C}$  for 20 h, the resulting solution was filtered through a pad of celite and further eluted with  $\text{EtOAc}$ . The filtrate was concentrated under reduced pressure, and the resulting mixture was purified by preparative MPLC (flow rate: 40 mL/min).



## 5. Screening of Reaction Conditions

**Table S1.** Screening of reaction conditions.

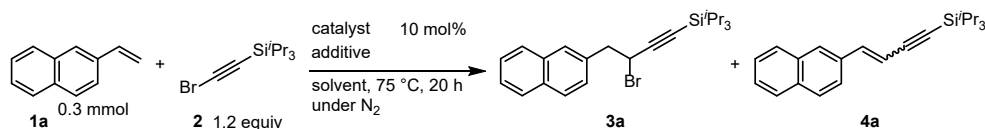

| entry           | catalyst                                      | additive                      | solvent          | yield of <b>3a</b> [%] | yield of <b>4a</b> [%] | recovery of <b>1a</b> [%] |
|-----------------|-----------------------------------------------|-------------------------------|------------------|------------------------|------------------------|---------------------------|
| 1               | Pd(OAc) <sub>2</sub>                          | —                             | toluene          | 68                     | 8                      | 0                         |
| 2               | PdBr <sub>2</sub>                             | —                             | toluene          | 40                     | 3                      | 42                        |
| 3               | Pd(PPh <sub>3</sub> ) <sub>4</sub>            | —                             | toluene          | 0                      | 0                      | 94                        |
| 4               | Pd <sub>2</sub> (dba) <sub>3</sub> (5 mol%)   | —                             | toluene          | 38                     | 3                      | 43                        |
| 5               | Ni(OAc) <sub>2</sub>                          | —                             | toluene          | 0                      | 0                      | 96                        |
| 6               | Ru(OAc) <sub>2</sub> ( <i>p</i> -cymene)      | —                             | toluene          | 0                      | 0                      | 78                        |
| 7               | [Rh(OAc) <sub>2</sub> ] <sub>2</sub> (5 mol%) | —                             | toluene          | 0                      | 0                      | 72                        |
| 8               | Cu(OAc) <sub>2</sub>                          | —                             | toluene          | 0                      | 0                      | 94                        |
| 9               | Ag(OAc) <sub>2</sub>                          | —                             | toluene          | 0                      | 0                      | 95                        |
| 10              | Pd(OAc) <sub>2</sub>                          | —                             | CCl <sub>4</sub> | 46                     | 8                      | 7                         |
| 11              | Pd(OAc) <sub>2</sub>                          | —                             | HFIP             | 0                      | 0                      | 0                         |
| 12              | Pd(OAc) <sub>2</sub>                          | —                             | MeCN             | 2                      | 0                      | 0                         |
| 13              | Pd(OAc) <sub>2</sub>                          | —                             | DMF              | 0                      | 9                      | 70                        |
| 14 <sup>a</sup> | Pd(OAc) <sub>2</sub>                          | —                             | toluene          | 71 (61)                | 7                      | 0                         |
| 15 <sup>a</sup> | Pd(OAc) <sub>2</sub>                          | LiBr (2 equiv)                | toluene          | 66                     | 4                      | <5                        |
| 16 <sup>a</sup> | Pd(OAc) <sub>2</sub>                          | AcOH (2 equiv)                | toluene          | 59                     | 7                      | 0                         |
| 17 <sup>a</sup> | Pd(OAc) <sub>2</sub>                          | PPh <sub>3</sub> (20 mol%)    | toluene          | 0                      | 0                      | >99                       |
| 18 <sup>a</sup> | Pd(OAc) <sub>2</sub>                          | P(OEt) <sub>3</sub> (20 mol%) | toluene          | 65                     | 6                      | <5                        |
| 19 <sup>a</sup> | Pd(OAc) <sub>2</sub>                          | bpy (10 mol%)                 | toluene          | 38                     | 3                      | 43                        |

Reaction conditions: **1a** (0.3 mmol), **2** (0.36 mmol), Pd(OAc)<sub>2</sub> (0.03 mmol), solvent (1 mL), 75 °C, 20 h, under N<sub>2</sub> unless otherwise noted. Yields and recovery were determined by <sup>1</sup>H NMR with 1,1,2,2-tetrachloroethane as internal standard. Value in parenthesis is isolated yield. (a) Under air.

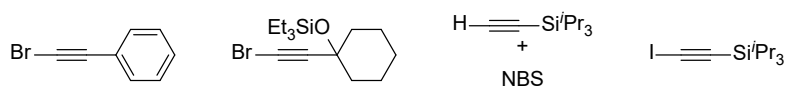

**Figure S1.** Ineffective reagents for Pd-catalyzed 1,1-alkynylation of **1a**.

## 6. Characterization of Products

### [3-Bromo-4-(naphthalen-2-yl)but-1-yn-1-yl]triisopropylsilane (3a).

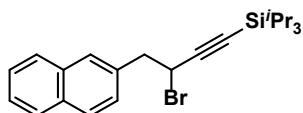

Pale yellow oil, 75.8 mg, 61% yield.  $R_f = 0.37$  (hexane).  $^1\text{H NMR}$  (400 MHz,  $\text{CDCl}_3$ ):  $\delta$  7.82–7.77 (c, 3H), 7.73 (s, 1H), 7.48–7.39 (c, 3H), 4.77 (dd,  $J = 7.5, 6.9$  Hz, 1H), 3.53–3.47 (m, 2H), 1.01 (br, 21H).  $^{13}\text{C NMR}$  (101 MHz,  $\text{CDCl}_3$ ):  $\delta$  134.6, 133.3, 132.6, 128.4, 128.0, 127.7, 127.6, 127.5, 126.0, 125.7, 105.2, 90.1, 46.2, 36.9, 18.5, 11.1. IR (ATR,  $\text{cm}^{-1}$ ): 2943 m, 2865 m, 1463 m, 1382 w. MS (EI, relative intensity, %)  $m/z$ : 416 (37,  $[\text{M} + 2]^+$ ), 414 (36,  $\text{M}^+$ ), 291 (18), 249 (29), 221 (34), 219 (23), 207 (28), 205 (32), 195 (52), 193 (42), 179 (22), 178 (25), 167 (91), 165 (100), 141 (41), 139 (62), 137 (60), 125 (16), 123 (12), 115 (28), 111 (28), 110 (21), 83 (18), 59 (34). HRMS (DART)  $m/z$ :  $[\text{M} + \text{H}]^+$  Calcd for  $\text{C}_{23}\text{H}_{32}\text{BrSi}$  415.14512; Found 415.14421.

### (3-Bromo-4-phenylbut-1-yn-1-yl)triisopropylsilane (3b).

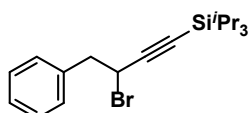

Pale yellow oil, 80.1 mg, 69% yield.  $R_f = 0.42$  (pentane).  $^1\text{H NMR}$  (400 MHz,  $\text{CDCl}_3$ ):  $\delta$  7.32–7.22 (m, 5H), 4.67 (dd,  $J = 7.8, 6.9$  Hz, 1H), 3.36–3.26 (m, 2H), 1.03 (s, 21H).  $^{13}\text{C NMR}$  (101 MHz,  $\text{CDCl}_3$ ):  $\delta$  137.1, 129.5, 128.3, 127.2, 105.1, 89.8, 46.0, 37.0, 18.5, 11.1. IR (ATR,  $\text{cm}^{-1}$ ): 2943 m, 2865 m, 1462 m. MS (EI, relative intensity, %)  $m/z$ : 323 (10), 321 (10,  $[\text{M} - ^i\text{Pr}]^+$ ), 241 (10), 195 (39), 193 (38), 185 (10), 183 (10), 171 (21), 169 (11), 168 (10), 167 (100), 166 (10), 165 (98), 139 (65), 137 (66). HRMS (DART)  $m/z$ :  $[\text{M} + \text{H}]^+$  Calcd for  $\text{C}_{19}\text{H}_{30}\text{BrSi}$  365.12947; Found 365.13066.

### [3-Bromo-4-(4-tolyl)but-1-yn-1-yl]triisopropylsilane (3c).

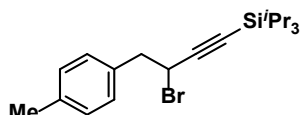

Pale yellow oil, 69.8 mg, 61% yield.  $R_f = 0.41$  (pentane).  $^1\text{H NMR}$  (400 MHz,  $\text{CDCl}_3$ ):  $\delta$  7.16 (d,  $J = 8.2$  Hz, 2H), 7.10 (d,  $J = 7.8$  Hz, 2H), 4.64 (t,  $J = 7.3$  Hz, 1H), 3.27 (d,  $J = 7.1$  Hz, 2H), 2.32 (s, 3H), 1.04 (s, 21H).  $^{13}\text{C NMR}$  (101 MHz,  $\text{CDCl}_3$ ):  $\delta$  136.8, 134.1, 129.4, 129.0, 105.3, 89.7, 45.6, 37.4, 21.1, 18.5, 11.1. IR (ATR,  $\text{cm}^{-1}$ ): 2942 m, 2865 m, 1463 m. MS (EI, relative intensity, %)  $m/z$ : 380 (2,  $[\text{M} + 2]^+$ ), 378 (2,  $\text{M}^+$ ), 255 (14), 213 (20), 199 (11), 197 (13), 195 (55), 193 (54), 185 (20), 183 (10), 167 (100), 165 (95), 139 (52), 137 (51). HRMS (DART)  $m/z$ :  $[\text{M} + \text{H}]^+$  Calcd for  $\text{C}_{20}\text{H}_{32}\text{BrSi}$  379.14512; Found 379.14502.

### [3-Bromo-4-[4-(trifluoromethyl)phenyl]but-1-yn-1-yl]triisopropylsilane (3d).

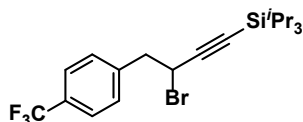

Pale yellow oil, 125.3 mg, 98% yield.  $R_f = 0.43$  (hexane).  $^1\text{H NMR}$  (400 MHz,  $\text{CDCl}_3$ ):  $\delta$  7.57 (d,  $J = 8.0$  Hz, 2H), 7.41 (d,  $J = 8.0$  Hz, 2H), 4.72 (dd,  $J = 7.7, 6.5$  Hz, 1H), 3.40 (dd,  $J = 13.9, 6.5$  Hz, 1H), 3.35 (dd,  $J = 13.7, 7.8$  Hz, 1H), 1.02 (s, 21H).  $^{13}\text{C NMR}$  (101 MHz,  $\text{CDCl}_3$ ):  $\delta$  140.9, 129.9, 129.5 (q,  $J = 32.4$  Hz), 125.2 (q,  $J = 3.9$  Hz), 124.1 (q,  $J = 272.0$  Hz), 104.4, 90.6, 45.4, 35.9, 18.4, 11.1.  $^{19}\text{F NMR}$  (376 MHz,  $\text{CDCl}_3$ ):  $\delta$  -63.0. IR (ATR,  $\text{cm}^{-1}$ ): 2945 w, 2867 w, 1323 s, 1166 m, 1127 s. MS (EI, relative intensity, %)  $m/z$ : 392 (17), 391 (80), 390 (18), 389 (79,  $[\text{M} - ^i\text{Pr}]^+$ ), 309 (18), 267 (25), 239 (34), 177 (34), 159 (34), 141 (34), 140 (42), 139 (15), 122 (100). HRMS (DART)  $m/z$ :  $[\text{M} + \text{H}]^+$  Calcd for  $\text{C}_{20}\text{H}_{29}\text{BrF}_3\text{Si}$  433.11685; Found 433.11544.

### 4-[2-Bromo-4-(triisopropylsilyl)but-3-yn-1-yl]benzonitrile (3e).

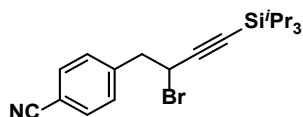

Pale yellow oil, 94.8 mg, 72% yield.  $R_f = 0.45$  (hexane/EtOAc = 9/1).  $^1\text{H NMR}$  (400 MHz,  $\text{CDCl}_3$ ):  $\delta$  7.61 (d,  $J = 8.2$  Hz, 2H), 7.42 (d,  $J = 8.5$  Hz, 2H), 4.72 (dd,  $J = 7.6, 6.4$  Hz, 1H), 3.39 (dd,  $J = 13.7, 6.4$  Hz, 1H), 3.35 (dd,  $J = 14.0, 7.6$  Hz, 1H), 1.03 (s, 21H).  $^{13}\text{C NMR}$  (101 MHz,  $\text{CDCl}_3$ ):  $\delta$  142.1, 132.0, 130.4, 118.7, 111.1, 104.1, 90.8, 45.4, 35.4, 18.4, 11.0. IR (ATR,  $\text{cm}^{-1}$ ): 2943 m, 2865 m, 2229 w, 1463 m. MS (EI, relative intensity, %)  $m/z$ : 348 (55), 346 (53,  $[\text{M} - ^i\text{Pr}]^+$ ), 268 (59), 266 (45), 224 (28), 212 (32), 210 (27), 198 (36), 196 (61), 167 (100), 165 (94), 139 (58), 137 (59). HRMS (DART)  $m/z$ :  $[\text{M} + \text{H}]^+$  Calcd for  $\text{C}_{20}\text{H}_{29}\text{BrNSi}$  390.12472; Found 390.12611.

### 4-[2-Bromo-4-(triisopropylsilyl)but-3-yn-1-yl]benzoic acid (3f).

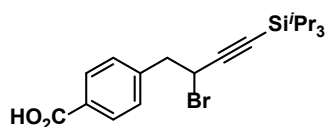

White powder, 114.1 mg, 91% yield.  $R_f = 0.05$  (hexane/EtOAc = 4/1). Mp = 108.5–110.0 °C.  $^1\text{H NMR}$  (400 MHz,  $\text{CDCl}_3$ ):  $\delta$  12.21 (br, 1H), 8.08–8.05 (m, 2H), 7.41 (d,  $J = 8.4$  Hz, 2H), 4.73 (dd,  $J = 7.5, 6.7$  Hz, 1H), 3.45–3.35 (m, 2H), 1.03 (s, 21H).  $^{13}\text{C NMR}$  (101 MHz,  $\text{CDCl}_3$ ):  $\delta$  171.9, 143.2, 130.3, 129.8, 128.2, 104.6, 90.5, 45.7, 35.9, 18.5, 11.1. IR (ATR,  $\text{cm}^{-1}$ ): 3075 w, 2943 m, 2865 m, 1692 s, 1423 m. MS (EI, relative intensity, %)  $m/z$ : 368 (24), 367 (99), 366 (24), 365 (100,  $[\text{M} - ^i\text{Pr}]^+$ ), 287 (11), 286 (10), 285 (24), 155 (13). HRMS (DART)  $m/z$ :  $[\text{M} + \text{H}]^+$  Calcd for  $\text{C}_{20}\text{H}_{30}\text{BrO}_2\text{Si}$  409.11930; Found 409.11972.

**[3-Bromo-4-(4-nitrophenyl)but-1-yn-1-yl]triisopropylsilane (3g).**

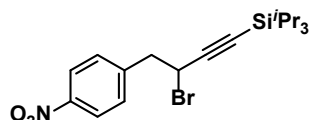

Pale yellow oil, 99.9 mg, 82% yield.  $R_f = 0.51$  (hexane/EtOAc = 9/1).  $^1\text{H NMR}$  (400 MHz,  $\text{CDCl}_3$ ):  $\delta$  8.18 (dt,  $J = 9.0, 2.2$  Hz, 2H), 7.48 (dt,  $J = 9.1, 2.2$  Hz, 2H), 4.75 (dd,  $J = 7.3, 6.5$  Hz, 1H), 3.44 (dd,  $J = 13.9, 6.5$  Hz, 1H), 3.40 (dd,  $J = 13.9, 7.3$  Hz, 1H), 1.03 (s, 21H).  $^{13}\text{C NMR}$  (101 MHz,  $\text{CDCl}_3$ ):  $\delta$  147.2, 144.2, 130.5, 123.4, 104.1, 91.0, 45.1, 35.3, 18.4, 11.0. IR (ATR,  $\text{cm}^{-1}$ ): 2943 m, 2865 m, 1522 s, 1463 m, 1345 s. MS (EI, relative intensity, %)  $m/z$ : 369 (23), 368 (100), 367 (23), 366 (97,  $[\text{M} - ^i\text{Pr}]^+$ ), 288 (23), 286 (31), 279 (68), 277 (63), 216 (32), 167 (58), 165 (50), 139 (50), 137 (47), 128 (39). HRMS (DART)  $m/z$ :  $[\text{M} + \text{H}]^+$  Calcd for  $\text{C}_{19}\text{H}_{29}\text{BrNO}_2\text{Si}$  410.11454; Found 410.11413.

**[3-Bromo-4-(4-fluorophenyl)but-1-yn-1-yl]triisopropylsilane (3h).**

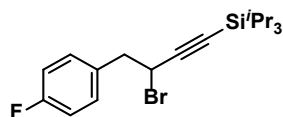

Pale yellow oil, 84.4 mg, 72% yield.  $R_f = 0.42$  (pentane).  $^1\text{H NMR}$  (400 MHz,  $\text{CDCl}_3$ ):  $\delta$  7.27–7.22 (m, 2H), 6.99 (tt,  $J = 9.0, 2.4$  Hz, 2H), 4.65 (dd,  $J = 7.8, 6.6$  Hz, 1H), 3.30 (dd,  $J = 13.8, 6.5$  Hz, 1H), 3.26 (dd,  $J = 13.8, 7.8$  Hz, 1H), 1.04 (s, 21H).  $^{13}\text{C NMR}$  (101 MHz,  $\text{CDCl}_3$ ):  $\delta$  162.1 (d,  $J = 245.6$  Hz), 132.8 (d,  $J = 3.9$  Hz), 131.1 (d,  $J = 7.7$  Hz), 115.1 (d,  $J = 22.2$  Hz), 104.8, 90.2, 45.0, 36.9, 18.5, 11.1.  $^{19}\text{F NMR}$  (376 MHz,  $\text{CDCl}_3$ ):  $\delta$  -115.9. IR (ATR,  $\text{cm}^{-1}$ ): 2943 m, 2866 m, 1510 s, 1463 m, 1227 s. MS (EI, relative intensity, %)  $m/z$ : 341 (10), 339 (10,  $[\text{M} - ^i\text{Pr}]^+$ ), 261 (10), 259 (11), 195 (31), 193 (31), 189 (29), 167 (100), 165 (99), 139 (69), 137 (65), 127 (32), 95 (15). HRMS (DART)  $m/z$ :  $[\text{M} + \text{H}]^+$  Calcd for  $\text{C}_{19}\text{H}_{29}\text{BrFSi}$  383.12004; Found 383.12014.

**[3-Bromo-4-(4-chlorophenyl)but-1-yn-1-yl]triisopropylsilane (3i).**

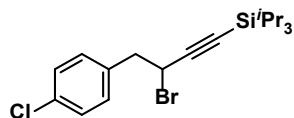

Pale yellow oil, 100.0 mg, 83% yield.  $R_f = 0.46$  (pentane).  $^1\text{H NMR}$  (400 MHz,  $\text{CDCl}_3$ ):  $\delta$  7.27 (dt,  $J = 8.6, 2.1$  Hz, 2H), 7.22 (dt,  $J = 8.5, 2.1$  Hz, 2H), 4.65 (dd,  $J = 7.5, 6.6$  Hz, 1H), 3.30 (dd,  $J = 14.0, 6.6$  Hz, 1H), 3.26 (dd,  $J = 14.0, 7.6$  Hz, 1H), 1.03 (s, 21H).  $^{13}\text{C NMR}$  (101 MHz,  $\text{CDCl}_3$ ):  $\delta$  135.4, 133.1, 130.9, 128.4, 104.7, 90.3, 45.1, 36.5, 18.5, 11.1. IR (ATR,  $\text{cm}^{-1}$ ): 2943 m, 2865 m, 1686 w, 1493 m, 1463 m, 1092 m. MS (EI, relative intensity, %)  $m/z$ : 357 (13), 355 (10,  $[\text{M} - ^i\text{Pr}]^+$ ), 207 (12), 205 (16), 195 (37), 193 (40), 167 (100), 165 (100), 139 (60), 137 (58), 125 (25), 111 (10). HRMS (DART)  $m/z$ :  $[\text{M} + \text{H}]^+$  Calcd for  $\text{C}_{19}\text{H}_{29}\text{BrClSi}$  399.09049; Found 399.08878.

**[3-Bromo-4-(4-bromophenyl)but-1-yn-1-yl]triisopropylsilane (3j).**

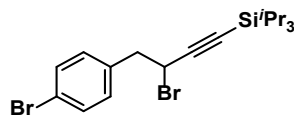

Pale yellow oil, 80.7 mg, 64% yield.  $R_f = 0.43$  (pentane).  $^1\text{H NMR}$  (400 MHz,  $\text{CDCl}_3$ ):  $\delta$  7.42 (dt,  $J = 8.8, 2.2$  Hz, 2H), 7.16 (dt,  $J = 8.5, 2.2$  Hz, 2H), 4.65 (dd,  $J = 7.6, 6.6$  Hz, 1H), 3.28 (dd,  $J = 14.0, 6.6$  Hz, 1H), 3.24 (dd,  $J = 14.0, 7.6$  Hz, 1H), 1.03 (s, 21H).  $^{13}\text{C NMR}$  (101 MHz,  $\text{CDCl}_3$ ):  $\delta$  136.0, 131.4, 131.2, 121.3, 104.7, 90.3, 45.1, 36.4, 18.5, 11.1. IR (ATR,  $\text{cm}^{-1}$ ): 2942 m, 2865 m, 1489 m, 1463 m, 1072 m. MS (EI, relative intensity, %)  $m/z$ : 403 (10), 401 (20), 399 (10,  $[\text{M} - ^i\text{Pr}]^+$ ), 322 (36), 321 (25), 320 (33), 280 (52), 279 (93), 278 (52), 277 (84), 265 (11), 251 (34), 249 (31), 197 (35), 195 (40), 193 (36), 183 (13), 169 (32), 167 (100), 165 (95), 155 (20). HRMS (DART)  $m/z$ :  $[\text{M} + \text{H}]^+$  Calcd for  $\text{C}_{19}\text{H}_{29}\text{Br}_2\text{Si}$  443.03998; Found 443.03681.

**4-[2-Bromo-4-(triisopropylsilyl)but-3-yn-1-yl]phenyl acetate (3k).**

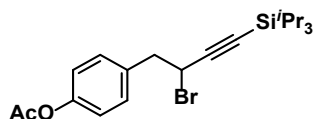

Pale yellow oil, 109.1 mg, 83% yield.  $R_f = 0.33$  (hexane/Et<sub>2</sub>O = 6/1). The analytically pure sample was obtained by GPC. <sup>1</sup>H NMR (400 MHz, CDCl<sub>3</sub>):  $\delta$  7.30 (dt,  $J = 9.0, 2.3$  Hz, 2H), 7.03 (dt,  $J = 8.9, 2.4$  Hz, 2H), 4.65 (dd,  $J = 7.5, 6.9$  Hz, 1H), 3.35–3.26 (m, 2H), 2.30 (s, 3H), 1.04 (s, 21H). <sup>13</sup>C NMR (101 MHz, CDCl<sub>3</sub>):  $\delta$  169.4, 149.8, 134.6, 130.5, 121.4, 104.9, 90.1, 45.2, 36.7, 21.1, 18.5, 11.1. IR (ATR, cm<sup>-1</sup>): 2943 w, 2865 w, 1765 m, 1508 w, 1463 w, 1368 w, 1194 s. MS (EI, relative intensity, %)  $m/z$ : 382 (25), 381 (100), 380 (25), 379 (96, [M - <sup>i</sup>Pr]<sup>+</sup>), 301 (35), 299 (34), 257 (33), 229 (32), 215 (25), 201 (22), 187 (25), 167 (45), 165 (44), 139 (26), 137 (29). HRMS (DART)  $m/z$ : [M + H]<sup>+</sup> Calcd for C<sub>21</sub>H<sub>32</sub>BrO<sub>2</sub>Si 423.13495; Found 423.13541.

**[3-Bromo-4-(4-methoxyphenyl)but-1-yn-1-yl]triisopropylsilane (3l).**

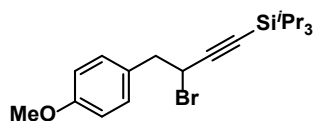

Pale yellow oil, 27.0 mg, 21% yield.  $R_f = 0.22$  (hexane/toluene = 9/1). <sup>1</sup>H NMR (400 MHz, CDCl<sub>3</sub>):  $\delta$  7.20 (d,  $J = 8.4$  Hz, 2H), 6.83 (d,  $J = 8.7$  Hz, 2H), 4.62 (t,  $J = 7.2$  Hz, 1H), 3.79 (s, 3H), 3.30–3.20 (m, 2H), 1.04 (s, 21H). <sup>13</sup>C NMR (101 MHz, CDCl<sub>3</sub>):  $\delta$  158.7, 130.6, 129.3, 113.7, 105.3, 89.7, 55.2, 45.1, 37.5, 18.5, 11.1. IR (ATR, cm<sup>-1</sup>): 2942 m, 2865 m, 1612 w, 1513 s, 1463 m, 1249 s. MS (EI, relative intensity, %)  $m/z$ : 396 (5, [M + 2]<sup>+</sup>), 394 (5, M<sup>+</sup>), 351 (4), 314 (15), 271 (36), 229 (18), 215 (13), 201 (20), 167 (29), 165 (30), 139 (21), 137 (21), 121 (100). HRMS (DART)  $m/z$ : [M + H]<sup>+</sup> Calcd for C<sub>20</sub>H<sub>32</sub>BrOSi 395.14003; Found 395.14184.

**[3-Bromo-4-[4-(4,4,5,5-tetramethyl-1,3,2-dioxaborolan-2-yl)phenyl]but-1-yn-1-yl]triisopropylsilane (3m).**

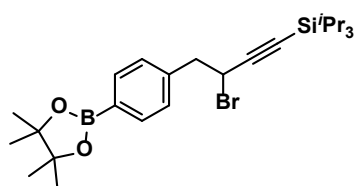

Pale yellow oil, 87.2 mg, 59% yield.  $R_f = 0.50$  (hexane/Et<sub>2</sub>O = 6/1). <sup>1</sup>H NMR (400 MHz, CDCl<sub>3</sub>):  $\delta$  7.75 (d,  $J = 8.0$  Hz, 2H), 7.29 (d,  $J = 8.2$  Hz, 2H), 4.67 (t,  $J = 7.2$  Hz, 1H), 3.38–3.29 (c, 2H), 1.34 (s, 12H), 1.04 (s, 21H). <sup>13</sup>C NMR (101 MHz, CDCl<sub>3</sub>):  $\delta$  140.3, 134.9, 128.8, 105.2, 89.9, 83.7, 46.1, 36.8, 24.8, 18.5, 11.1 (one signal is missing). <sup>11</sup>B NMR (128 MHz, CDCl<sub>3</sub>):  $\delta$  31.3. IR (ATR, cm<sup>-1</sup>): 2943 m, 2866 m, 1464 w, 1399 m, 1360 s. MS (EI, relative intensity, %)  $m/z$ : 492 (3, [M + 2]<sup>+</sup>), 490 (3, M<sup>+</sup>), 449 (18), 447 (17), 410 (17), 368 (10), 367 (30), 211 (19), 197 (14), 169 (15), 155 (12), 83 (100). HRMS (DART)  $m/z$ : [M + H]<sup>+</sup> Calcd for C<sub>25</sub>H<sub>41</sub>BBro<sub>2</sub>Si 491.21468; Found 491.21273.

**[3-Bromo-4-(3-tolyl)but-1-yn-1-yl]triisopropylsilane (3n).**

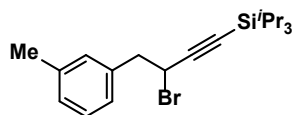

Pale yellow oil, 93.2 mg, 77% yield.  $R_f = 0.40$  (pentane). <sup>1</sup>H NMR (400 MHz, CDCl<sub>3</sub>):  $\delta$  7.19 (t,  $J = 7.6$  Hz, 1H), 7.11–7.04 (c, 3H), 4.66 (dd,  $J = 8.1, 6.7$  Hz, 1H), 3.30 (dd,  $J = 13.7, 6.7$  Hz, 1H), 3.26 (dd,  $J = 13.7, 8.0$  Hz, 1H), 2.33 (s, 3H), 1.04 (s, 21H). <sup>13</sup>C NMR (101 MHz, CDCl<sub>3</sub>):  $\delta$  137.9, 137.1, 130.2, 128.2, 127.9, 126.5, 105.3, 89.7, 46.0, 37.1, 21.3, 18.5, 11.1. IR (ATR, cm<sup>-1</sup>): 2942 m, 2865 m, 1463 m. MS (EI, relative intensity, %)  $m/z$ : 337 (10), 335 (10, [M - <sup>i</sup>Pr]<sup>+</sup>), 257 (14), 255 (14), 213 (15), 195 (41), 193 (38), 185 (22), 171 (16), 169 (18), 167 (100), 165 (92), 139 (59), 137 (59). HRMS (DART)  $m/z$ : [M + H]<sup>+</sup> Calcd for C<sub>20</sub>H<sub>32</sub>BrSi 379.14512; Found 379.14530.

**[3-Bromo-4-(3-methoxyphenyl)but-1-yn-1-yl]triisopropylsilane (3o).**

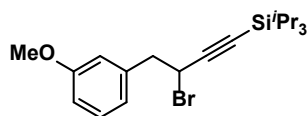

Pale yellow oil, 76.9 mg, 65% yield.  $R_f = 0.56$  (hexane/Et<sub>2</sub>O = 6/1). <sup>1</sup>H NMR (400 MHz, CDCl<sub>3</sub>):  $\delta$  7.23–7.19 (m, 1H), 6.86 (d,  $J = 7.8$  Hz, 1H), 6.81–6.79 (c, 2H), 4.67 (t,  $J = 7.3$  Hz, 1H), 3.79 (s, 3H), 3.34–3.25 (c, 2H), 1.03 (s, 21H). <sup>13</sup>C NMR (101 MHz, CDCl<sub>3</sub>):  $\delta$  159.5, 138.6, 129.3, 121.8, 115.3, 112.4, 105.2, 89.8, 55.1, 46.1, 36.9, 18.5, 11.1. IR (ATR, cm<sup>-1</sup>): 2942 m, 2865 m, 1601 m, 1587 m, 1491 m, 1462 m, 1261 s, 1153 m. MS (EI, relative intensity, %)  $m/z$ : 396 (12, [M + 2]<sup>+</sup>), 394 (12, M<sup>+</sup>), 353 (53), 351 (52), 273 (22), 271 (28), 201 (34), 195 (22), 193 (21), 187 (27), 185 (16), 167 (100), 165 (99), 139 (67), 137 (67), 121 (13). HRMS (DART)  $m/z$ : [M + H]<sup>+</sup> Calcd for C<sub>20</sub>H<sub>31</sub>BrOSi 395.14003; Found 395.14026.

**[3-Bromo-4-(2-tolyl)but-1-yn-1-yl]triisopropylsilane (3p).**

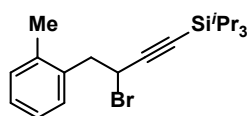

Pale yellow oil, 84.3 mg, 72% yield.  $R_f = 0.45$  (pentane). <sup>1</sup>H NMR (400 MHz, CDCl<sub>3</sub>):  $\delta$  7.25–7.22 (m, 1H), 7.16–7.12 (c, 3H), 4.67 (dd,  $J = 8.7, 6.6$  Hz, 1H), 3.38 (dd,  $J = 13.8, 6.8$  Hz, 1H), 3.33 (dd,  $J = 13.8, 8.6$  Hz, 1H), 2.35 (s, 3H), 1.03 (s, 21H). <sup>13</sup>C NMR (101 MHz, CDCl<sub>3</sub>):  $\delta$  136.3, 135.6, 130.4, 130.3, 127.3, 125.9, 105.3, 89.6, 43.3, 36.0, 19.6, 18.5, 11.1. IR (ATR, cm<sup>-1</sup>): 2943 m, 2865 m, 1462 m. MS (EI, relative intensity, %)  $m/z$ : 337 (8), 335 (8, [M - <sup>i</sup>Pr]<sup>+</sup>), 257 (12), 255 (15), 213 (20), 195 (40), 193 (39), 185 (23), 183 (18), 171

(16), 169 (15), 167 (100), 165 (94), 141 (20), 139 (66), 137 (65), 105 (24). HRMS (DART)  $m/z$ :  $[M + H]^+$  Calcd for  $C_{20}H_{32}BrSi$  379.14512; Found 379.14443.

**[4-(1,3-Benzodioxol-5-yl)-3-bromobut-1-yn-1-yl]triisopropylsilane (3q).**

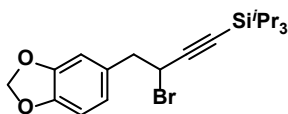

Pale yellow oil, 57.8 mg, 43% yield.  $R_f$  = 0.28 (hexane/toluene = 9/1).  $^1H$  NMR (400 MHz,  $CDCl_3$ ):  $\delta$  6.79–6.71 (c, 3H), 5.94–5.92 (m, 2H), 4.61 (dd,  $J$  = 7.8, 6.6 Hz, 1H), 3.24 (dd,  $J$  = 13.7, 6.6 Hz, 1H), 3.20 (dd,  $J$  = 13.7, 8.0 Hz, 1H), 1.04 (s, 21H).  $^{13}C$  NMR (101 MHz,  $CDCl_3$ ):  $\delta$  147.4, 146.7, 130.9, 122.8, 109.9, 108.1, 105.1, 100.9, 90.0, 45.6, 37.3, 18.5, 11.1. IR (ATR,  $cm^{-1}$ ): 2943 m, 2865 m, 1491 m, 1444 m, 1249 s. MS (EI, relative intensity, %)  $m/z$ : 410 (32,  $[M + 2]^+$ ), 408 (31,  $M^+$ ), 310 (16), 308 (16), 285 (38), 272 (62), 243 (26), 229 (20), 227 (15), 215 (30), 213 (23), 201 (24), 185 (32), 167 (40), 165 (44), 139 (34), 137 (34), 135 (100). HRMS (DART)  $m/z$ :  $[M + H]^+$  Calcd for  $C_{20}H_{30}BrO_2Si$  409.11930; Found 409.11813.

**[3-Bromo-4-(naphthalen-1-yl)but-1-yn-1-yl]triisopropylsilane (3r).**

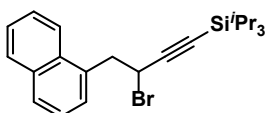

Pale yellow oil, 96.5 mg, 80% yield.  $R_f$  = 0.36 (pentane).  $^1H$  NMR (400 MHz,  $CDCl_3$ ):  $\delta$  7.98 (d,  $J$  = 8.3 Hz, 1H), 7.86 (d,  $J$  = 8.0 Hz, 1H), 7.78 (d,  $J$  = 8.1 Hz, 1H), 7.56–7.37 (c, 4H), 4.87–4.82 (m, 1H), 3.88 (dd,  $J$  = 14.1, 6.1 Hz, 1H), 3.73 (dd,  $J$  = 14.0, 9.0 Hz, 1H), 1.05–0.99 (m, 21H).  $^{13}C$  NMR (101 MHz,  $CDCl_3$ ):  $\delta$  133.8, 133.1, 131.6, 129.0, 128.4, 128.1, 126.3, 125.6, 125.3, 123.1, 105.2, 90.1, 43.4, 36.1, 18.5, 11.1. IR (ATR,  $cm^{-1}$ ): 2942 m, 2864 m, 1462 m. MS (EI, relative intensity, %)  $m/z$ : 373 (29), 371 (28,  $[M - Pr]^+$ ), 293 (30), 292 (31), 291 (100), 263 (24), 249 (31), 221 (31), 219 (37), 207 (31), 205 (39), 167 (31), 165 (27), 141 (25). HRMS (DART)  $m/z$ :  $[M + H]^+$  Calcd for  $C_{23}H_{32}BrSi$  415.14512; Found 415.14627.

**[3-Bromo-4-(phenanthren-9-yl)but-1-yn-1-yl]triisopropylsilane (3s).**

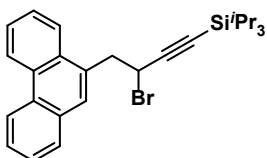

The reaction was performed for 48 h. Pale yellow oil, 82.7 mg, 59% yield.  $R_f$  = 0.30 (hexane).  $^1H$  NMR (400 MHz,  $CDCl_3$ ):  $\delta$  8.76–8.73 (m, 1H), 8.65 (d,  $J$  = 8.2 Hz, 1H), 8.04–8.00 (m, 1H), 7.82 (dd,  $J$  = 7.7, 1.5 Hz, 1H), 7.74 (s, 1H), 7.69–7.55 (c, 4H), 4.94 (dd,  $J$  = 9.3, 5.8 Hz, 1H), 3.95 (dd,  $J$  = 14.1, 5.8 Hz, 1H), 3.77 (dd,  $J$  = 14.2, 9.1 Hz, 1H), 0.97 (s, 21H).  $^{13}C$  NMR (101 MHz,  $CDCl_3$ ):  $\delta$  131.32, 131.26, 130.8, 130.47, 130.1, 129.2, 128.5, 126.9, 126.7, 126.6, 126.4, 123.6, 123.4, 122.4, 105.2, 90.1, 44.1, 35.7, 18.4, 11.0. IR (ATR,  $cm^{-1}$ ): 2942 s, 2864 s, 1462 s. MS (EI, relative intensity, %)  $m/z$ : 466 (6,  $[M + 2]^+$ ), 464 (6,  $M^+$ ), 386 (27), 385 (30), 384 (87), 344 (15), 343 (49), 342 (33), 341 (100), 285 (59), 271 (65), 269 (67), 191 (39). HRMS (DART)  $m/z$ :  $[M + H]^+$  Calcd for  $C_{27}H_{34}BrSi$  465.16077; Found 465.15953.

**[4-(Benzofuran-2-yl)-3-bromobut-1-yn-1-yl]triisopropylsilane (3t).**

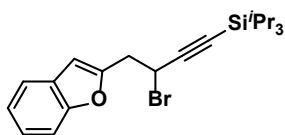

The reaction was performed for 48 h. Pale yellow oil, 48.0 mg, 39% yield.  $R_f$  = 0.39 (hexane).  $^1H$  NMR (400 MHz,  $CDCl_3$ ):  $\delta$  7.51 (dd,  $J$  = 7.6, 0.9 Hz, 1H), 7.41 (d,  $J$  = 8.2 Hz, 1H), 7.26–7.17 (c, 2H), 6.61 (s, 1H), 4.88 (t,  $J$  = 7.2 Hz, 1H), 3.53 (dd,  $J$  = 15.1, 7.3 Hz, 1H), 3.49 (dd,  $J$  = 15.2, 7.2 Hz, 1H), 1.03 (s, 21H).  $^{13}C$  NMR (101 MHz,  $CDCl_3$ ):  $\delta$  154.8, 153.7, 128.4, 123.9, 122.7, 120.7, 110.9, 105.1, 104.6, 89.8, 39.3, 33.4, 18.4, 11.0. IR (ATR,  $cm^{-1}$ ): 2943 s, 2865 s, 1454 s, 1254 m. MS (EI, relative intensity, %)  $m/z$ : 406 (36,  $[M + 2]^+$ ), 404 (35,  $M^+$ ), 363 (77), 361 (75), 321 (35), 319 (34), 239 (62), 225 (24), 211 (100), 197 (47), 195 (33), 193 (25), 167 (61), 165 (70), 131 (79). HRMS (DART)  $m/z$ :  $[M + H]^+$  Calcd for  $C_{21}H_{30}BrOSi$  405.12438; Found 405.12392.

**[4-(Benzo[b]thiophen-2-yl)-3-bromobut-1-yn-1-yl]triisopropylsilane (3u).**

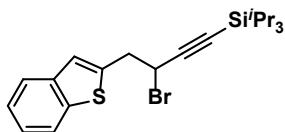

The reaction was performed for 48 h. Pale yellow oil, 54.8 mg, 43% yield.  $R_f$  = 0.37 (hexane).  $^1H$  NMR (400 MHz,  $CDCl_3$ ):  $\delta$  7.78–7.75 (m, 1H), 7.70–7.67 (m, 1H), 7.34–7.26 (c, 2H), 7.20 (d,  $J$  = 0.7 Hz, 1H), 4.76 (t,  $J$  = 7.0 Hz, 1H), 3.66–3.56 (m, 2H), 1.04–1.01 (m, 21H).  $^{13}C$  NMR (101 MHz,  $CDCl_3$ ):  $\delta$  139.7, 139.6, 124.2, 124.0, 123.7, 123.2, 122.1, 104.6, 90.5, 41.0, 35.8, 18.5, 11.1 (one signal is obscured by overlap with another signal). IR (ATR,  $cm^{-1}$ ): 2942 s, 2865 s, 1461 s. MS (EI, relative intensity, %)  $m/z$ : 422 (16,  $[M + 2]^+$ ), 420 (14,  $M^+$ ), 379 (81), 377 (74), 287 (39), 285 (46), 255 (50), 227 (53), 215 (41), 195 (29), 193 (26), 167 (89), 165 (100), 147 (60), 139

(54), 137 (60). HRMS (DART)  $m/z$ :  $[M + H]^+$  Calcd for  $C_{21}H_{30}BrSSi$  421.10154; Found 421.10050.

**3-[2-Bromo-4-(triisopropylsilyl)but-3-yn-1-yl]estra-1,3,5(10)-trien-17-one (3v).**

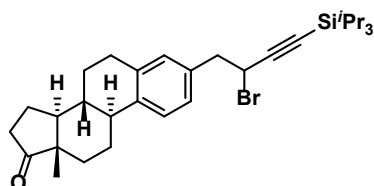

Pale yellow oil, 95.1 mg, 59% yield.  $R_f$  = 0.15 (hexane/Et<sub>2</sub>O = 6/1). The analytically pure sample was obtained by preparative HPLC (eluent: hexane/Et<sub>2</sub>O = 87/13, flow rate: 8 mL/min). <sup>1</sup>H NMR (400 MHz, CDCl<sub>3</sub>):  $\delta$  7.22 (d,  $J$  = 8.0 Hz, 1H), 7.07 (dd,  $J$  = 8.0, 1.8 Hz, 1H), 7.02–6.99 (m, 1H), 4.68–4.64 (m, 1H), 3.31–3.21 (m, 2H), 2.93–2.85 (m, 2H), 2.54–2.36 (c, 2H), 2.33–2.22 (m, 1H), 2.20–1.90 (c, 4H), 1.68–1.37 (m, 6H), 1.08–1.00 (m, 21H), 0.91 (s, 3H). <sup>13</sup>C NMR (101 MHz, CDCl<sub>3</sub>):  $\delta$  221.0, [138.63, 138.61], 136.4, [134.67, 134.63], [130.1, 130.0], [126.83, 126.79], 125.3, [105.35, 105.30], [89.66, 89.62], 50.4, 48.0, 45.5, 44.3, 38.1, [37.12, 37.09], 35.8, 31.5, 29.3, 26.4, 25.6, 21.5, 18.5, 13.8, 11.1. IR (ATR, cm<sup>-1</sup>): 2940 s, 2864 m, 1740 s, 1462 m. MS (EI, relative intensity, %)  $m/z$ : 540 (3, M<sup>+</sup>), 461 (14), 460 (32), 458 (10), 420 (21), 419 (69), 418 (36), 417 (100), 267 (5). HRMS (DART)  $m/z$ :  $[M + H]^+$  Calcd for  $C_{31}H_{46}BrOSi$  541.24958; Found 541.24986.

**4-[2-Bromo-4-(triisopropylsilyl)but-3-yn-1-yl]benzyl 2-[1-(4-chlorobenzoyl)-5-methoxy-2-methyl-1H-indol-3-yl]acetate (3w).**

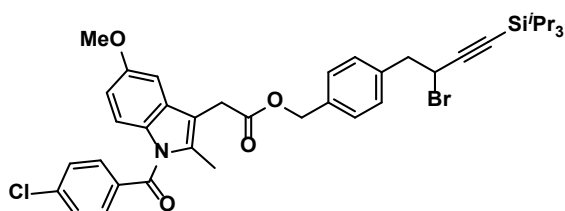

Pale yellow sticky solid, 173.0 mg, 79% yield.  $R_f$  = 0.13 (hexane/EtOAc = 9/1). <sup>1</sup>H NMR (400 MHz, CDCl<sub>3</sub>):  $\delta$  7.65 (dt,  $J$  = 8.8, 2.1 Hz, 2H), 7.45 (dt,  $J$  = 8.8, 2.2 Hz, 2H), 7.29–7.21 (m, 4H), 6.93 (d,  $J$  = 2.5 Hz, 1H), 6.88 (d,  $J$  = 8.9 Hz, 1H), 6.67 (dd,  $J$  = 9.2, 2.5 Hz, 1H), 5.11 (s, 2H), 4.67 (t,  $J$  = 7.1 Hz, 1H), 3.77 (s, 3H), 3.70 (s, 2H), 3.36–3.24 (m, 2H), 2.37 (s, 3H), 1.03 (s, 21H). <sup>13</sup>C NMR (101 MHz, CDCl<sub>3</sub>):  $\delta$  170.6, 168.2, 156.0, 139.2, 137.2, 135.9, 134.6, 133.8, 131.1, 130.7, 130.5, 129.7, 129.1, 128.2, 114.9, 112.4, 111.7, 105.0, 101.1, 90.0, 66.5, 55.6, 45.5, 36.8, 30.3, 18.5, 13.4, 11.1. IR (ATR, cm<sup>-1</sup>): 2943 m, 2865 m, 1737 m, 1684 s, 1593 w, 1477 m, 1459 m, 1357 m, 1316 s, 1259 m, 1222 s, 1142 s, 1089 m, 1067 s. MS (EI, relative intensity, %)  $m/z$ : 653 (24,  $[M - HBr]^+$ ), 610 (16), 312 (16), 141 (32), 139 (100). HRMS (DART)  $m/z$ :  $[M + H]^+$  Calcd for  $C_{39}H_{46}BrClNO_4Si$  734.20625; Found 734.20403.

**(3R,4S)-4-[4-[2-bromo-4-(triisopropylsilyl)but-3-yn-1-yl]phenyl]-1-(4-fluorophenyl)-3-[(S)-3-(4-fluorophenyl)-3-hydroxypropyl]azetididin-2-one (3x).**

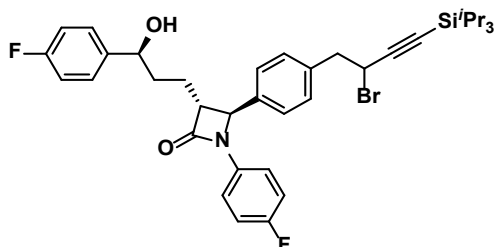

Pale yellow sticky solid, 70.2 mg, 35% yield.  $R_f$  = 0.10 (hexane/EtOAc = 4/1). The analytically pure sample was obtained by preparative HPLC (eluent: hexane/EtOAc = 75/25, flow rate: 8 mL/min). <sup>1</sup>H NMR (400 MHz, CDCl<sub>3</sub>):  $\delta$  7.32–7.19 (c, 8H), 7.05–6.98 (m, 2H), 6.95–6.88 (m, 2H), 4.75–4.64 (c, 2H), 4.62–4.57 (m, 1H), 3.37–3.24 (m, 2H), 3.12–3.04 (m, 1H), 2.30 (br, 1H), 2.07–1.82 (m, 4H), 1.05–0.94 (m, 21H). <sup>13</sup>C NMR (101 MHz, CDCl<sub>3</sub>):  $\delta$  167.4, 162.2 (d,  $J$  = 245.6 Hz), 159.0 (d,  $J$  = 243.7 Hz), 140.0, 137.6, 136.4, 133.7, 130.5, 127.3 (d,  $J$  = 7.7 Hz), 125.8, 118.3 (d,  $J$  = 7.7 Hz), 115.8 (d,  $J$  = 23.1 Hz), 115.3 (d,  $J$  = 21.2 Hz), [104.74, 104.72], [90.20, 90.15], 73.1, 61.1, 60.3, 45.4, [36.64, 36.62], 36.4, 25.0, [18.48, 18.43], [11.04, 11.02]. <sup>19</sup>F NMR (376 MHz, CDCl<sub>3</sub>):  $\delta$  -115.3, -118.5. IR (ATR, cm<sup>-1</sup>): 3461 w, 2943 m, 2865 m, 1745 m, 1510 s, 1462 w, 1224 m. MS (EI, relative intensity, %)  $m/z$ : 681 (4,  $[M + 2]^+$ ), 679 (4, M<sup>+</sup>), 599 (11), 558 (18), 557 (15), 556 (31), 421 (11), 419 (29), 417 (12), 406 (15), 365 (18), 364 (53), 363 (16), 362 (49), 209 (11), 167 (16), 165 (10), 154 (18), 153 (16), 147 (18), 146 (16), 145 (13), 136 (12), 135 (100). HRMS (DART)  $m/z$ :  $[M + H]^+$  Calcd for  $C_{37}H_{45}BrF_2NO_2Si$  680.23655; Found 680.23360.

**Isopropyl 2-(4-[4-[2-bromo-4-(triisopropylsilyl)but-3-yn-1-yl]benzoyl]phenoxy)-2-methylpropanoate (3y).**

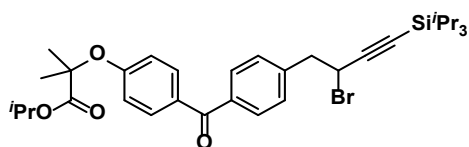

Pale yellow sticky solid, 151.0 mg, 81% yield.  $R_f$  = 0.28 (hexane/EtOAc = 9/1). The analytically pure sample was obtained by preparative HPLC (eluent: hexane/EtOAc = 94/6, flow rate: 8 mL/min). <sup>1</sup>H NMR (400 MHz, CDCl<sub>3</sub>):  $\delta$  7.77–7.68 (c, 4H), 7.39 (d,  $J$  = 8.2 Hz, 2H), 6.86 (dt,  $J$  = 9.3, 2.5 Hz, 2H), 5.09 (sept,  $J$  = 6.3 Hz, 1H), 4.74 (dd,  $J$  = 7.8, 6.4 Hz, 1H), 3.42 (dd,  $J$  = 13.7, 6.4 Hz, 1H), 3.37 (dd,  $J$  =

13.7, 7.8 Hz, 1H), 1.66 (s, 6H), 1.21 (d,  $J = 6.2$  Hz, 6H), 1.04 (s, 21H).  $^{13}\text{C}$  NMR (101 MHz,  $\text{CDCl}_3$ ):  $\delta$  195.0, 173.1, 159.5, 141.1, 137.0, 132.0, 130.5, 129.8, 129.4, 117.0, 104.7, 90.3, 79.3, 69.2, 45.6, 36.0, 25.3, 21.5, 18.5, 11.1. IR (ATR,  $\text{cm}^{-1}$ ): 2942 m, 2865 m, 1731 m, 1655 m, 1599 s, 1464 m, 1281 s, 1250 s, 1175 s, 1146 s, 1102 s. MS (EI, relative intensity, %)  $m/z$ : 614 (1,  $[\text{M} + 2]^+$ ), 612 (1,  $\text{M}^+$ ), 572 (11), 571 (27), 570 (10), 569 (25), 534 (10), 533 (21), 532 (24), 492 (25), 491 (73), 490 (46), 489 (100), 363 (62), 361 (70), 121 (90). HRMS (DART)  $m/z$ :  $[\text{M} + \text{H}]^+$  Calcd for  $\text{C}_{33}\text{H}_{46}\text{BrO}_4\text{Si}$  613.23433; Found 613.23299.

#### Phenyl 3-bromo-5-(triisopropylsilyl)pent-4-ynoate (3z).

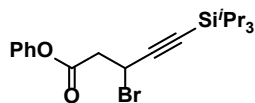

Pale yellow oil, 96.6 mg, 79% yield.  $R_f = 0.52$  (hexane/EtOAc = 9/1).  $^1\text{H}$  NMR (400 MHz,  $\text{CDCl}_3$ ):  $\delta$  7.41–7.35 (m, 2H), 7.27–7.22 (m, 1H), 7.11–7.08 (m, 2H), 5.00 (dd,  $J = 8.5, 6.4$  Hz, 1H), 3.39 (dd,  $J = 16.3, 6.2$  Hz, 1H), 3.32 (dd,  $J = 16.2, 8.5$  Hz, 1H), 1.08 (br, 21H).  $^{13}\text{C}$  NMR (101 MHz,  $\text{CDCl}_3$ ):  $\delta$  167.4, 150.3, 129.5, 126.1, 121.4, 104.1, 90.1, 45.1, 30.1, 18.5, 11.1. IR (ATR,  $\text{cm}^{-1}$ ): 2943 m, 2866 m, 1764 m, 1492 m, 1462 m, 1233 m, 1193 s, 1165 s. MS (EI, relative intensity, %)  $m/z$ : 367 (20), 365 (20,  $[\text{M} - \text{Pr}]^+$ ), 287 (20), 286 (28), 285 (100), 257 (26), 215 (28), 151 (23). HRMS (DART)  $m/z$ :  $[\text{M} + \text{H}]^+$  Calcd for  $\text{C}_{20}\text{H}_{30}\text{BrO}_2\text{Si}$  409.11930; Found 409.11900.

#### Benzyl 3-bromo-5-(triisopropylsilyl)pent-4-ynoate (3aa).

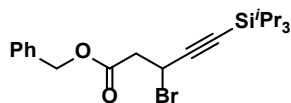

Pale yellow oil, 92.6 mg, 76% yield.  $R_f = 0.47$  (hexane/EtOAc = 9/1).  $^1\text{H}$  NMR (400 MHz,  $\text{CDCl}_3$ ):  $\delta$  7.39–7.33 (c, 5H), 5.16 (s, 2H), 4.91 (dd,  $J = 8.2, 6.4$  Hz, 1H), 3.22–3.10 (c, 2H), 1.05 (s, 21H).  $^{13}\text{C}$  NMR (101 MHz,  $\text{CDCl}_3$ ):  $\delta$  168.7, 135.3, 128.6, 128.4, 128.3, 104.3, 89.6, 67.0, 45.0, 30.2, 18.5, 11.0. IR (ATR,  $\text{cm}^{-1}$ ): 2943 m, 2866 m, 1742 s, 1461 m, 1176 s. MS (EI, relative intensity, %)  $m/z$ : 381 (4), 379 (4,  $[\text{M} - \text{Pr}]^+$ ), 300 (12), 299 (49), 229 (13), 91 (100). HRMS (DART)  $m/z$ :  $[\text{M} + \text{H}]^+$  Calcd for  $\text{C}_{21}\text{H}_{32}\text{BrO}_2\text{Si}$  423.13495; Found 423.13381.

#### 1,4-Phenylene bis(3-bromo-5-(triisopropylsilyl)pent-4-ynoate) (3ab).

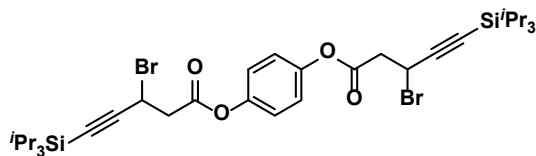

Pale yellow sticky solid, 153.8 mg, 69% yield.  $R_f = 0.43$  (hexane/EtOAc = 9/1).  $^1\text{H}$  NMR (400 MHz,  $\text{CDCl}_3$ ):  $\delta$  7.12 (s, 4H), 4.99 (dd,  $J = 8.5, 6.3$  Hz, 2H), 3.39 (dd,  $J = 16.2, 6.3$  Hz, 2H), 3.32 (dd,  $J = 16.2, 8.5$  Hz, 2H), 1.08 (s, 42H).  $^{13}\text{C}$  NMR (101 MHz,  $\text{CDCl}_3$ ):  $\delta$  167.2, 147.9, 122.4, 103.9, 90.2, 45.0, 29.9, 18.5, 11.0. IR (ATR,  $\text{cm}^{-1}$ ): 2943 m, 2866 m, 1764 m, 1500 m, 1463 m, 1174 s, 1124 s. MS (EI, relative intensity, %)  $m/z$ : 699 (11), 697 (15), 695 (7,  $[\text{M} - \text{Pr}]^+$ ), 618 (10), 617 (18), 615 (13), 538 (10), 537 (29), 536 (54), 535 (100), 249 (21), 248 (27), 209 (36), 167 (13), 153 (10), 139 (19). HRMS (DART)  $m/z$ :  $[\text{M} + \text{H}]^+$  Calcd for  $\text{C}_{34}\text{H}_{53}\text{Br}_2\text{O}_4\text{Si}_2$  739.18436; Found 739.18293.

#### 3-Bromo-5-(triisopropylsilyl)pent-4-yn-1-yl benzoate (3ac).

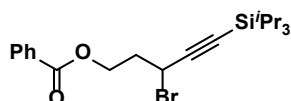

Pale yellow oil, 88.4 mg, 72% yield.  $R_f = 0.56$  (hexane/EtOAc = 9/1).  $^1\text{H}$  NMR (400 MHz,  $\text{CDCl}_3$ ):  $\delta$  8.06–8.02 (m, 2H), 7.59–7.54 (m, 1H), 7.47–7.42 (m, 2H), 4.73 (t,  $J = 7.0$  Hz, 1H), 4.58–4.47 (m, 2H), 2.52–2.45 (m, 2H), 1.07 (s, 21H).  $^{13}\text{C}$  NMR (101 MHz,  $\text{CDCl}_3$ ):  $\delta$  166.1, 133.1, 129.8, 129.6, 128.4, 104.7, 89.7, 62.2, 38.8, 33.2, 18.5, 11.0. IR (ATR,  $\text{cm}^{-1}$ ): 2943 m, 2865 m, 1724 s, 1463 w, 1269 s. MS (EI, relative intensity, %)  $m/z$ : 381 (29), 379 (31,  $[\text{M} - \text{Pr}]^+$ ), 301 (27), 299 (20), 273 (11), 271 (10), 257 (10), 236 (16), 235 (79), 193 (15), 177 (17), 135 (10), 105 (100). HRMS (DART)  $m/z$ :  $[\text{M} + \text{H}]^+$  Calcd for  $\text{C}_{21}\text{H}_{32}\text{BrO}_2\text{Si}$  423.13495; Found 423.13500.

#### (3-Bromo-5-phenylpent-1-yn-1-yl)triisopropylsilane (3ad).

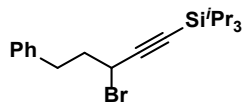

Pale yellow oil, 45.6 mg, 41% yield.  $R_f = 0.51$  (pentane).  $^1\text{H}$  NMR (400 MHz,  $\text{CDCl}_3$ ):  $\delta$  7.33–7.28 (m, 2H), 7.25–7.18 (c, 3H), 4.49 (t,  $J = 6.7$  Hz, 1H), 2.88 (t,  $J = 7.6$  Hz, 2H), 2.38–2.24 (m, 2H), 1.12–1.06 (m, 21H).  $^{13}\text{C}$  NMR (101 MHz,  $\text{CDCl}_3$ ):  $\delta$  140.2, 128.6, 126.3, 105.6, 89.3, 41.5, 36.6, 33.5, 18.6, 11.2 (one signal is obscured by overlap with another signal). IR (ATR,  $\text{cm}^{-1}$ ): 2943 m, 2865 m, 1461 m. MS (EI, relative intensity, %)  $m/z$ : 337 (17), 335 (17,  $[\text{M} - \text{Pr}]^+$ ), 255 (18), 227 (10), 213 (11), 109 (14), 95 (16), 91 (100). HRMS (DART)  $m/z$ :  $[\text{M} + \text{H}]^+$  Calcd for  $\text{C}_{20}\text{H}_{32}\text{BrSi}$  379.14512; Found 379.14656.

#### 2-[4-Bromo-6-(triisopropylsilyl)hex-5-yn-1-yl]isoindoline-1,3-dione (3ae).

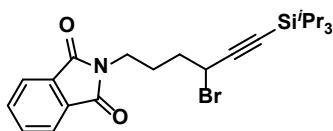

Pale yellow oil, 61.5 mg, 44% yield.  $R_f = 0.51$  (pentane/ $\text{CHCl}_3 = 3/2$ ).  $^1\text{H NMR}$  (400 MHz,  $\text{CDCl}_3$ ):  $\delta$  7.87–7.83 (m, 2H), 7.75–7.70 (m, 2H), 4.62 (t,  $J = 6.3$  Hz, 1H), 3.75 (t,  $J = 6.7$  Hz, 2H), 2.10–2.02 (m, 2H), 2.01–1.93 (m, 2H), 1.05 (s, 21H).  $^{13}\text{C NMR}$  (101 MHz,  $\text{CDCl}_3$ ):  $\delta$  168.3, 134.0, 132.0, 123.3, 105.2, 89.3, 36.9, 36.3, 26.5, 18.5, 11.1 (one signal is obscured by overlap with another signal). IR (ATR,  $\text{cm}^{-1}$ ): 2943 w, 2865 w, 1773 w, 1714 s, 1394 m. MS (EI, relative intensity, %)  $m/z$ : 420 (27), 418 (27,  $[\text{M} - \text{Pr}]^+$ ), 341 (18), 340 (67), 339 (29), 338 (100), 160 (10), 130 (15). HRMS (DART)  $m/z$ :  $[\text{M} + \text{H}]^+$  Calcd for  $\text{C}_{23}\text{H}_{33}\text{BrNO}_2\text{Si}$  462.14584; Found 462.14528.

## 7. Large-Scale Preparation of 3a

$\text{Pd}(\text{OAc})_2$  (168 mg, 0.75 mmol, 10 mol%), (2-bromoethynyl)triisopropylsilane (2.352 g, 9.0 mmol, 1.2 equiv), alkene (7.5 mmol, 1.157 g, 1 equiv) and toluene (25 mL) were added to a 100 mL of round-bottomed flask under air. After stirring the mixture at 75 °C for 20 h, the resulting solution was filtered through a pad of celite and further eluted with EtOAc. The crude mixture was concentrated under reduced pressure, and the resulting mixture was purified by preparative MPLC with Biotage® Sfär Silica HC chromatography cartridges (3 × 25 g) connected in series (eluent: hexane, flow rate: 80 mL/min) to give **3a** as a pale yellow oil (1.677 g, 54% yield).

## 8. Removal of Triisopropylsilyl Group

To a solution of **3a** (135 mg, 0.325 mmol) in THF (5 mL) at 0 °C, a mixture of TBAF (1 M in THF, 1 mL, 1 mmol) and AcOH (60.1 mg, 1 mmol) in THF (5 mL) added and the resulting mixture was stirred for 1.5 h. The reaction was quenched by adding water (10 mL), followed by  $\text{Et}_2\text{O}$  (10 mL). After separating the organic layer, the aqueous layer was extracted with  $\text{Et}_2\text{O}$  (2 × 10 mL). The combined organic layers were washed with brine (10 mL), dried over  $\text{Na}_2\text{SO}_4$ , filtered, and concentrated under reduced pressure. The resulting crude mixture was purified by silica-gel column chromatography (eluent: hexane/ $\text{Et}_2\text{O} = 100/0$  to 50/1) to obtain **5a** as a pale yellow oil (67.8 mg, 81% yield).

### 2-(2-Bromobut-3-yn-1-yl)naphthalene (5a).

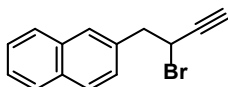

$R_f = 0.07$  (hexane).  $^1\text{H NMR}$  (400 MHz,  $\text{CDCl}_3$ ):  $\delta$  7.84–7.77 (c, 3H), 7.72 (s, 1H), 7.50–7.43 (c, 2H), 7.38 (dd,  $J = 8.4, 1.7$  Hz, 1H), 4.70 (td,  $J = 7.3, 2.3$  Hz, 1H), 3.52–3.43 (m, 2H), 2.65 (d,  $J = 2.3$  Hz, 1H).  $^{13}\text{C NMR}$  (101 MHz,  $\text{CDCl}_3$ ):  $\delta$  134.2, 133.3, 132.6, 128.4, 128.1, 127.73, 127.67, 127.3, 126.2, 125.9, 82.0, 76.0, 45.6, 35.5. IR (ATR,  $\text{cm}^{-1}$ ): 3289 w, 3054 w, 2359 w, 1509 w. MS (EI, relative intensity, %)  $m/z$ : 260 (14,  $[\text{M} + 2]^+$ ), 258 (14,  $\text{M}^+$ ), 179 (40), 178 (29), 142 (12), 141 (100), 115 (15), 89 (10). HRMS (DART)  $m/z$ :  $[\text{M} + \text{H}]^+$  Calcd for  $\text{C}_{14}\text{H}_{12}\text{Br}$  259.01169; Found 259.01008.

## 9. Mechanistic Studies

### Monitoring Reaction Progress

$\text{Pd}(\text{OAc})_2$  (33.7 mg, 0.15 mmol) or  $\text{Pd}_2(\text{dba})_3 \cdot \text{CHCl}_3$ <sup>16</sup> (77.7 mg, 0.075 mmol) was added to a 5 mL of volumetric flask, followed by the successive addition of **2** (472 mg, 1.8 mmol), **1a** (232 mg, 1.5 mmol), 1,1,2,2-tetrachloroethane (internal standard, 125 mg). Toluene- $d_8$  was added to the mixture up to a total volume of 5 mL and the resulting mixture was sonicated, after which 0.50 mL of the solution was transferred via a micro syringe to a NMR tube equipped with a J. Young valve. Each reaction mixture was heated at 75 °C and cooled on an ice bath every 5 minutes. Concentrations of **3a** were determined by  $^1\text{H NMR}$  analysis. Each reaction was repeated three times, and the average values of the concentrations of **3a** versus time were respectively plotted (Figure S2).



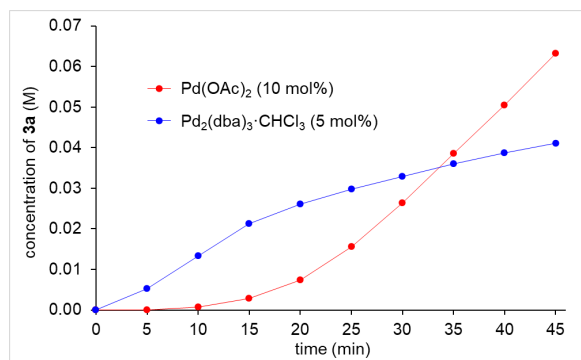

Figure S2. Monitoring the initial progress of Pd-catalyzed 1,1-alkynylbromination of **1a**.

### Hammett Plot

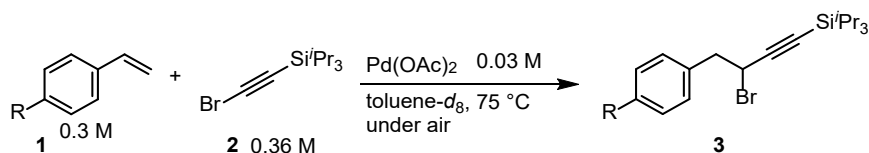

| R               | $\sigma_p$ | $k_R$ 1 | $k_R$ 2 | $k_R$ 3 | Average $k_R$ | Average $\log(k_R/k_H)$ |
|-----------------|------------|---------|---------|---------|---------------|-------------------------|
| Me              | -0.17      | 0.00846 | 0.00804 | 0.00862 | 0.00837       | 0.0767                  |
| H               | 0          | 0.00727 | 0.00712 | 0.00666 | 0.00702       | 0                       |
| F               | 0.06       | 0.00685 | 0.00651 | 0.00632 | 0.00656       | -0.0292                 |
| OAc             | 0.31       | 0.00539 | 0.00555 | 0.00535 | 0.00543       | -0.111                  |
| CF <sub>3</sub> | 0.54       | 0.00371 | 0.00395 | 0.00403 | 0.00390       | -0.256                  |

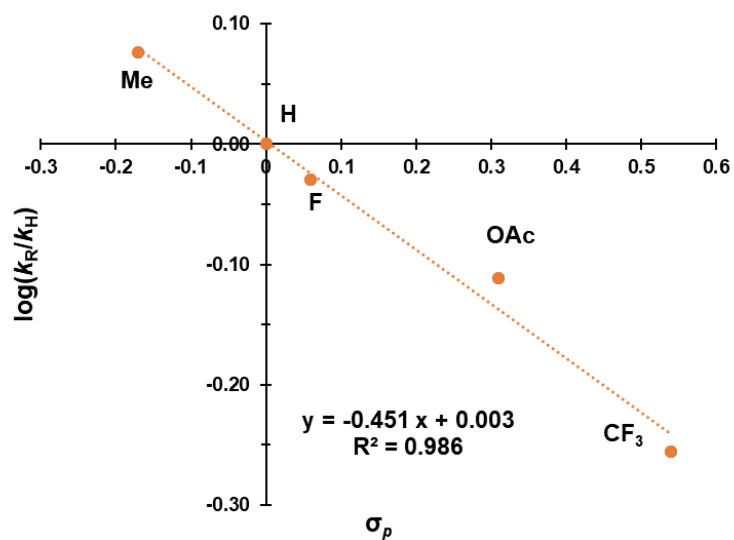

Figure S3. Hammett plot.

## Deuterium-Labeling Experiments

$^1\text{H}$  NMR spectra of **1a** and deuterated starting materials ( $[\text{D}_1]\text{-1a}$  and  $[\text{D}_2]\text{-1a}$ ).

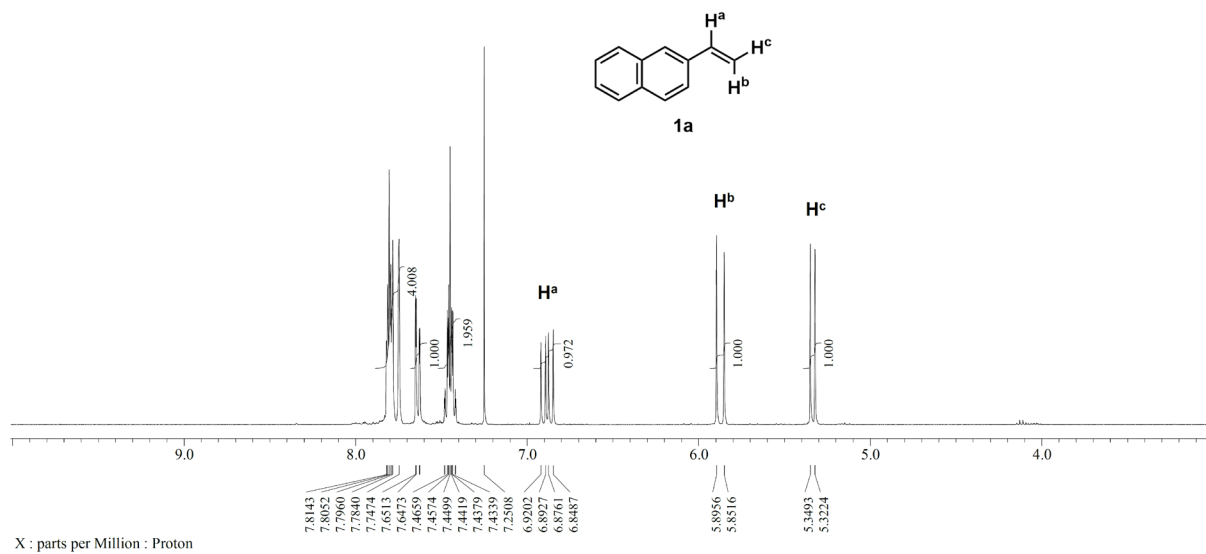

Figure S4.  $^1\text{H}$  NMR spectrum of **1a** (400 MHz,  $\text{CDCl}_3$ ).

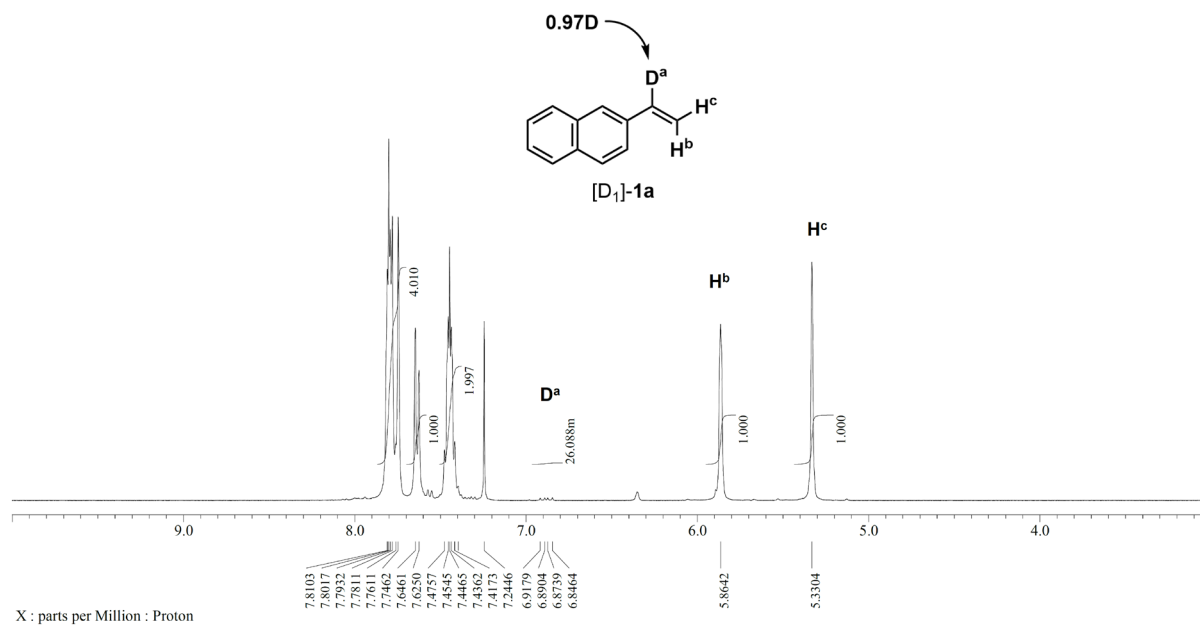

Figure S5.  $^1\text{H}$  NMR spectrum of  $[\text{D}_1]\text{-1a}$  (400 MHz,  $\text{CDCl}_3$ ).

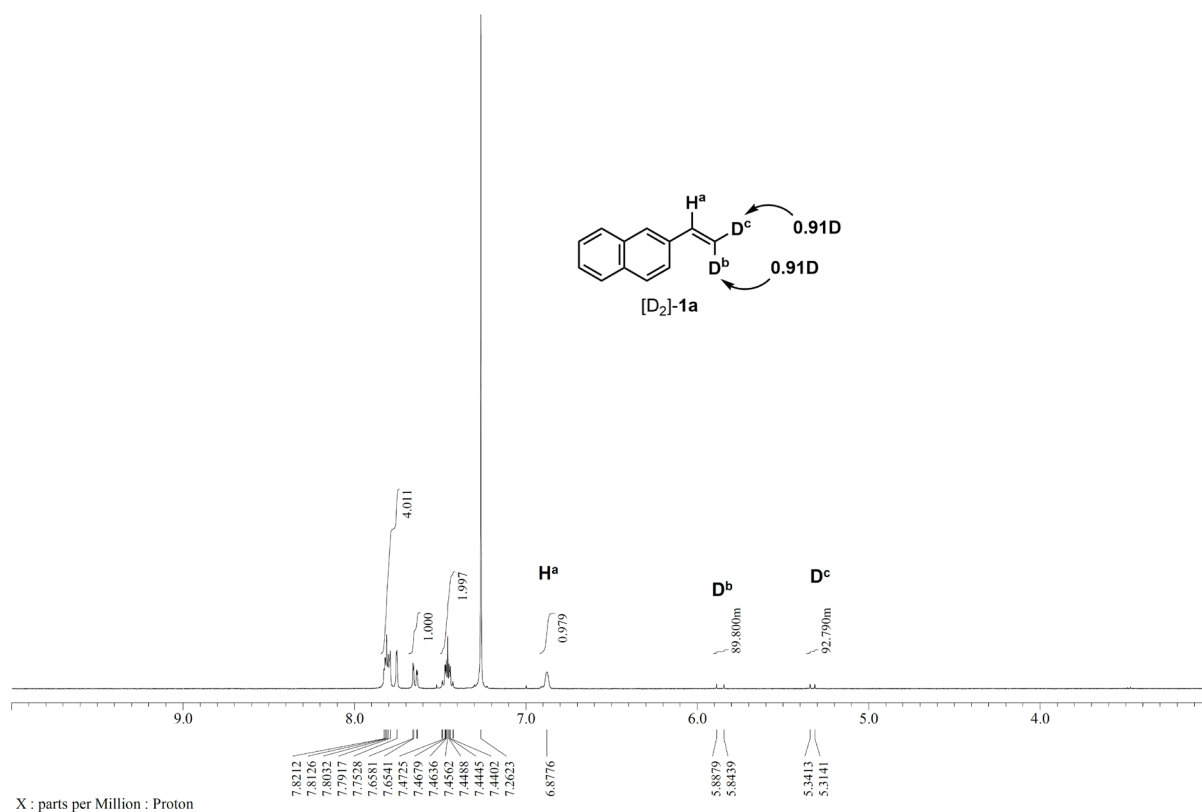

**Figure S6.**  $^1\text{H}$  NMR spectrum of  $[\text{D}_2]\text{-1a}$  (400 MHz,  $\text{CDCl}_3$ ).

#### Reaction of the deuterated substrate $[\text{D}_1]\text{-1a}$ .

The reaction of  $[\text{D}_1]\text{-1a}$  (46.9 mg, 0.3 mmol) with **2** was performed by following the General Procedure for the Pd-Catalyzed 1,1-Alkynylbromination of Alkenes under air, giving the corresponding 1,1-alkynylbromination product  $[\text{D}_1]\text{-3a}$  as a pale yellow oil (73.3 mg, 58% yield). The obtained  $[\text{D}_1]\text{-3a}$  was analyzed by  $^1\text{H}$  and  $^2\text{H}$  NMR spectroscopies to confirm the incorporation of deuterium atoms (Figure S7 and S8). According to the  $^1\text{H}$  NMR spectrum for **3a**, the integral of the aromatic proton's singlet at 7.73 ppm was set to 1.00.

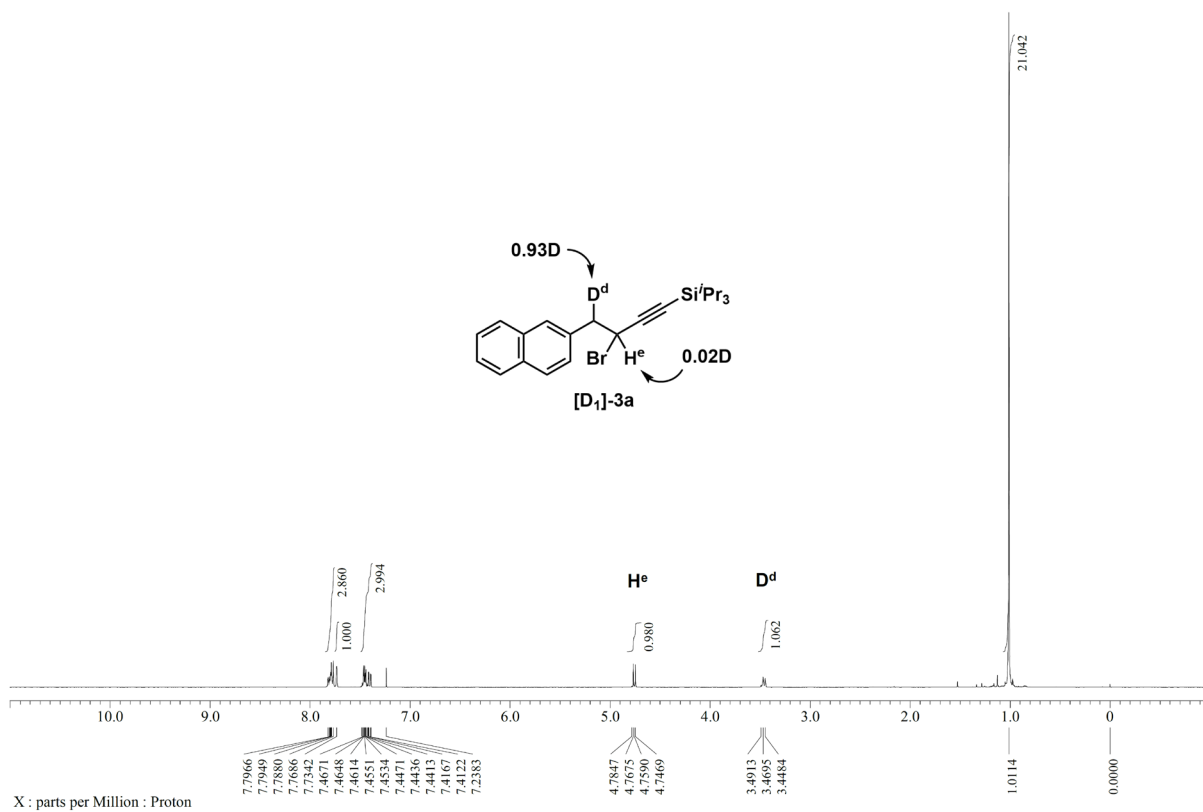

Figure S7.  $^1H$  NMR spectrum of  $[D_1]-3a$  (400 MHz,  $CDCl_3$ ).

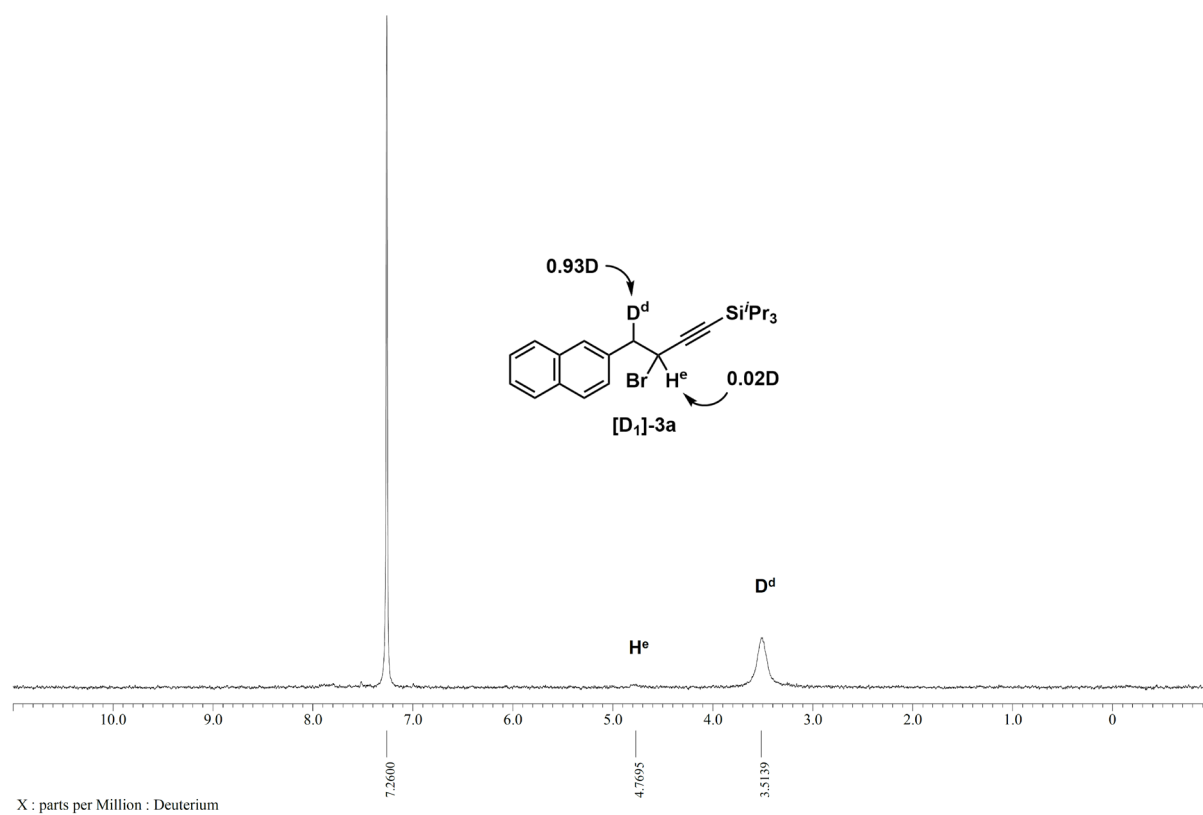

Figure S8.  $^2H$  NMR spectrum of  $[D_1]-3a$  (61 MHz,  $CHCl_3/CDCl_3$ ).

### Reaction of the deuterated substrate [D<sub>2</sub>]-1a.

The reaction of [D<sub>2</sub>]-1a (46.9 mg, 0.3 mmol) with **2** was performed by following the General Procedure for the Pd-Catalyzed 1,1-Alkynylation of Alkenes under air, giving the corresponding 1,1-alkynylation product [D<sub>2</sub>]-3a as a pale yellow oil (80.0 mg, 64% yield). The obtained [D<sub>2</sub>]-3a was analyzed by <sup>1</sup>H and <sup>2</sup>H NMR spectroscopies to confirm the incorporation of deuterium atoms (Figure S9 and S10). According to the <sup>1</sup>H NMR spectrum for **3a**, the integral of the aromatic proton's singlet at 7.73 ppm was set to 1.00.

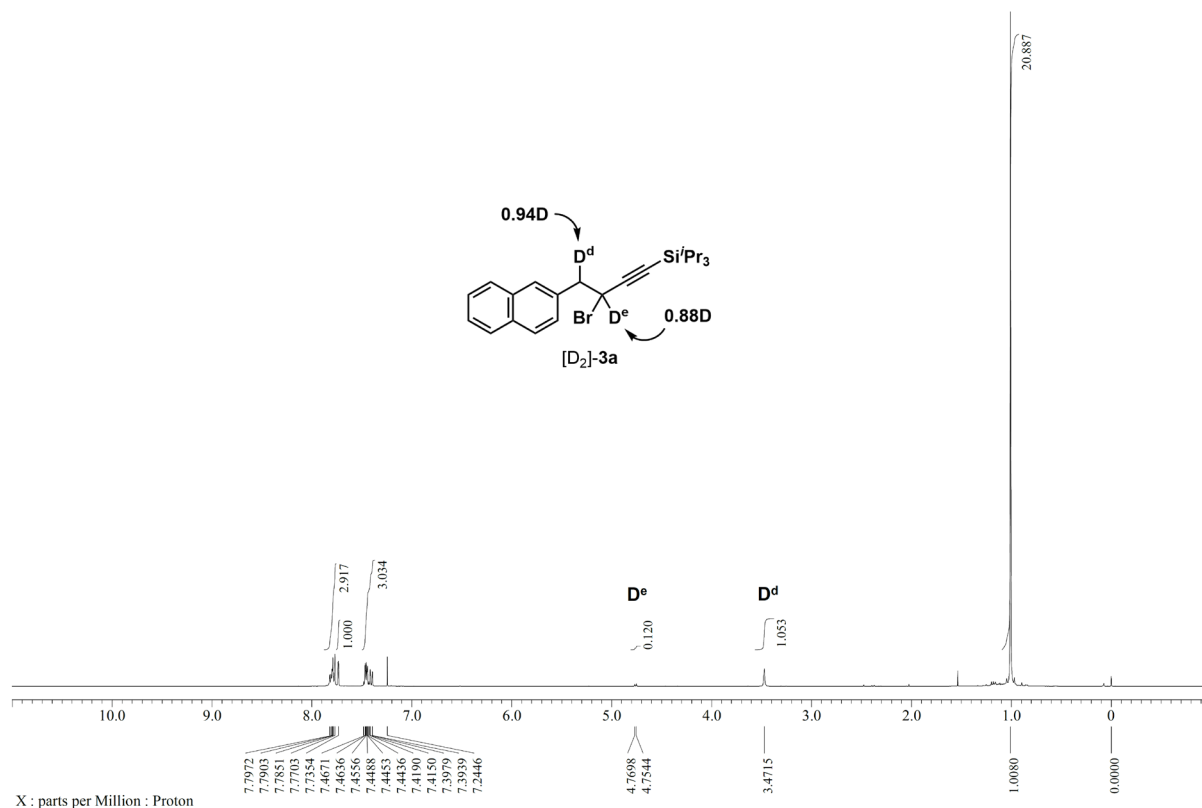

Figure S9. <sup>1</sup>H NMR spectrum of [D<sub>2</sub>]-3a (400 MHz, CDCl<sub>3</sub>).

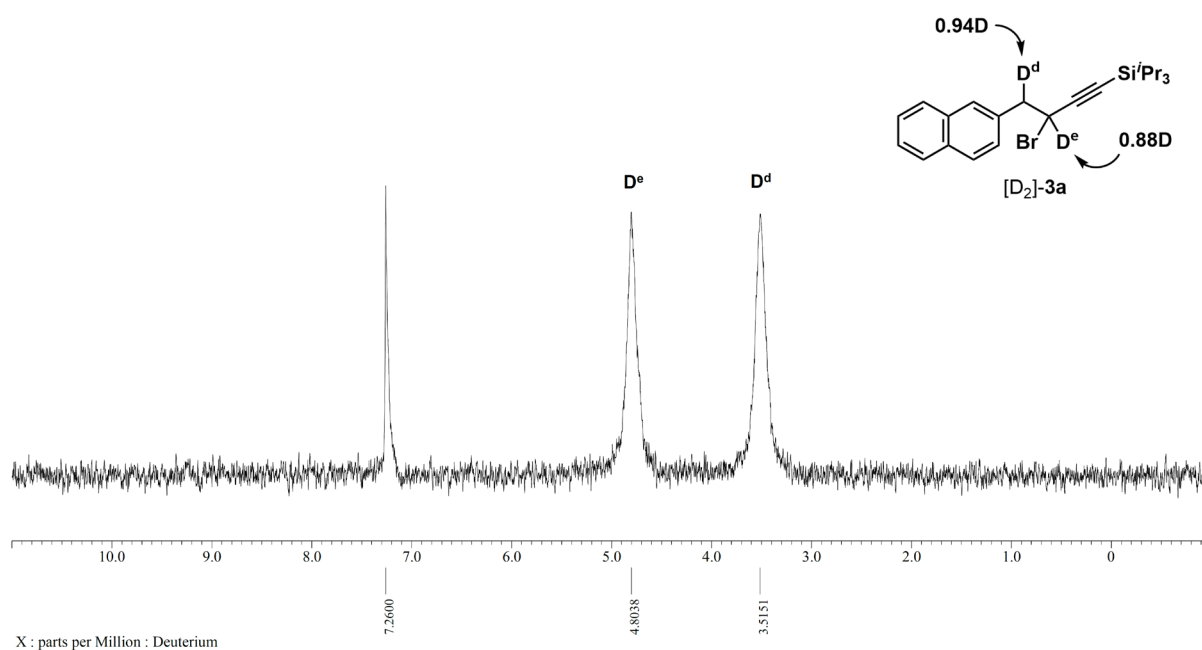

Figure S10. <sup>2</sup>H NMR spectrum of [D<sub>2</sub>]-3a (61 MHz, CHCl<sub>3</sub>/CDCl<sub>3</sub>).

### Reaction of the deuterated substrate [D<sub>2</sub>]-1a in the absence of 2.

The reaction of [D<sub>2</sub>]-1a (47.2 mg, 0.3 mmol) was performed by following the General Procedure for the Pd-Catalyzed 1,1-Alkynylation of Alkenes in the absence of 2 under air. The resulting crude mixture (54.5 mg) was analyzed by <sup>1</sup>H NMR to determine the 86% recovery of [D<sub>2</sub>]-1a. The incorporation of deuterium atoms in the recovered [D<sub>2</sub>]-1a was confirmed by <sup>1</sup>H and <sup>2</sup>H NMR analysis (Figure S11 and S12). According to the <sup>1</sup>H NMR spectrum for 1a (Figure S4), the integral of the aromatic proton's multiplet at 7.65–7.62 ppm was set to 1.00.

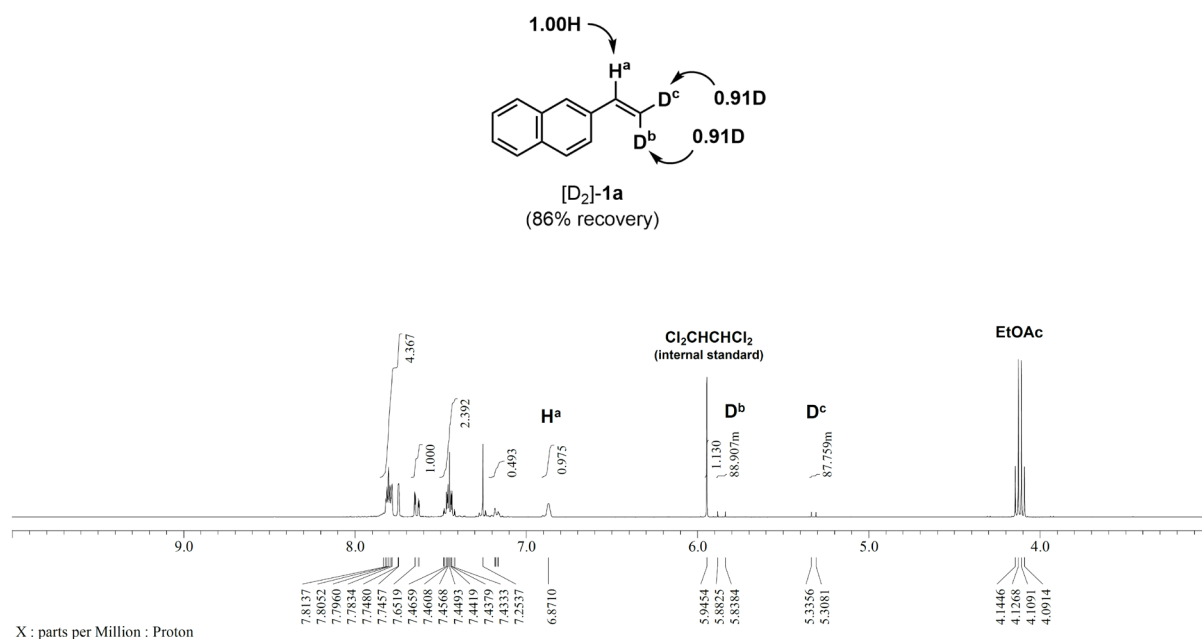

Figure S11. <sup>1</sup>H NMR spectrum of the crude mixture obtained from the reaction of [D<sub>2</sub>]-1a in the absence of 2 (400 MHz, CDCl<sub>3</sub>).

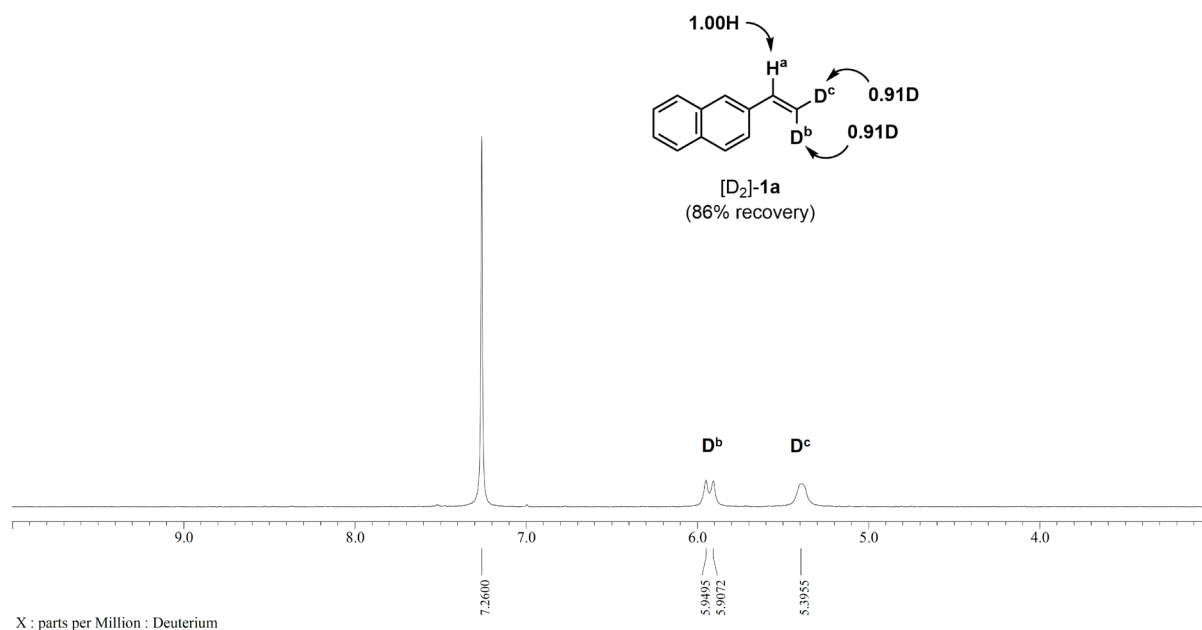

Figure S12. <sup>2</sup>H NMR spectrum of the crude mixture obtained from the reaction of [D<sub>2</sub>]-1a in the absence of 2 (61 MHz, CHCl<sub>3</sub>/CDCl<sub>3</sub>).

<sup>1</sup>H NMR spectra of **1s** and deuterated starting materials ( $\alpha$ -[D<sub>1</sub>]-**1s**, (*E*)-[D<sub>1</sub>]-**1s**, and (*Z*)-[D<sub>1</sub>]-**1s**).

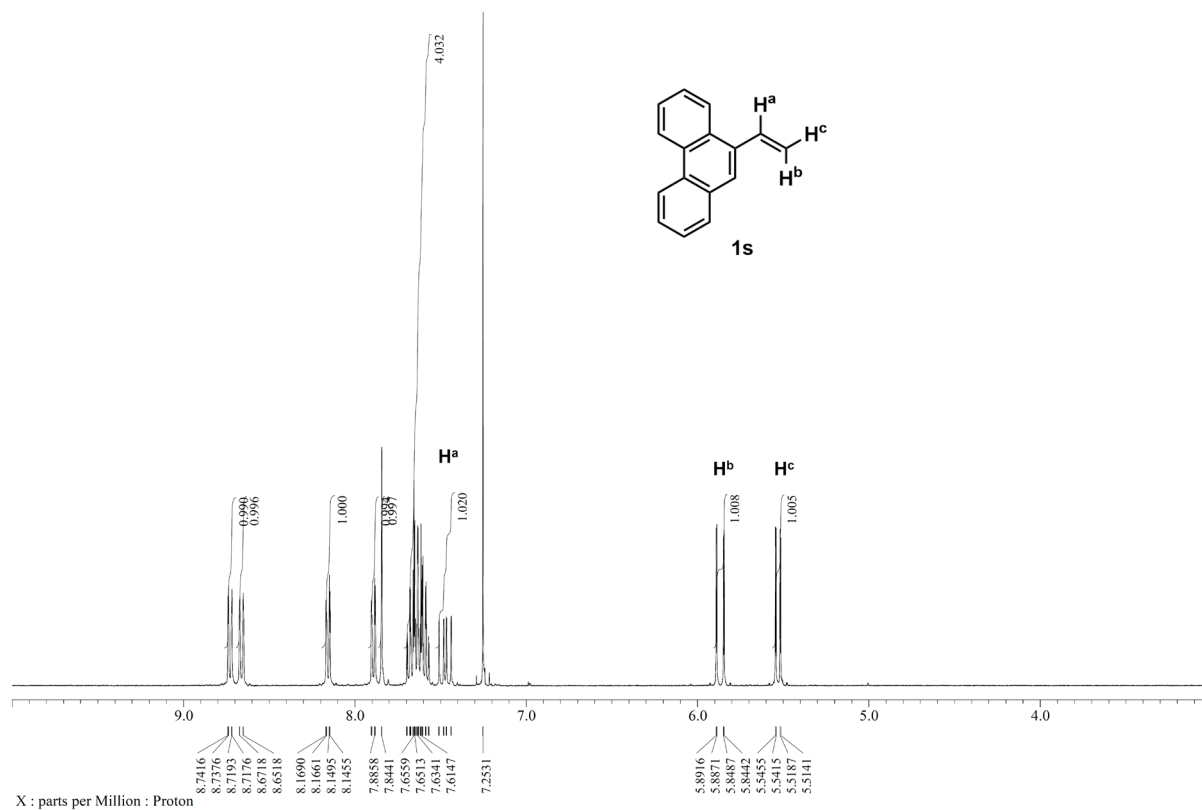

**Figure S13.** <sup>1</sup>H NMR spectrum of **1s** (400 MHz, CDCl<sub>3</sub>).

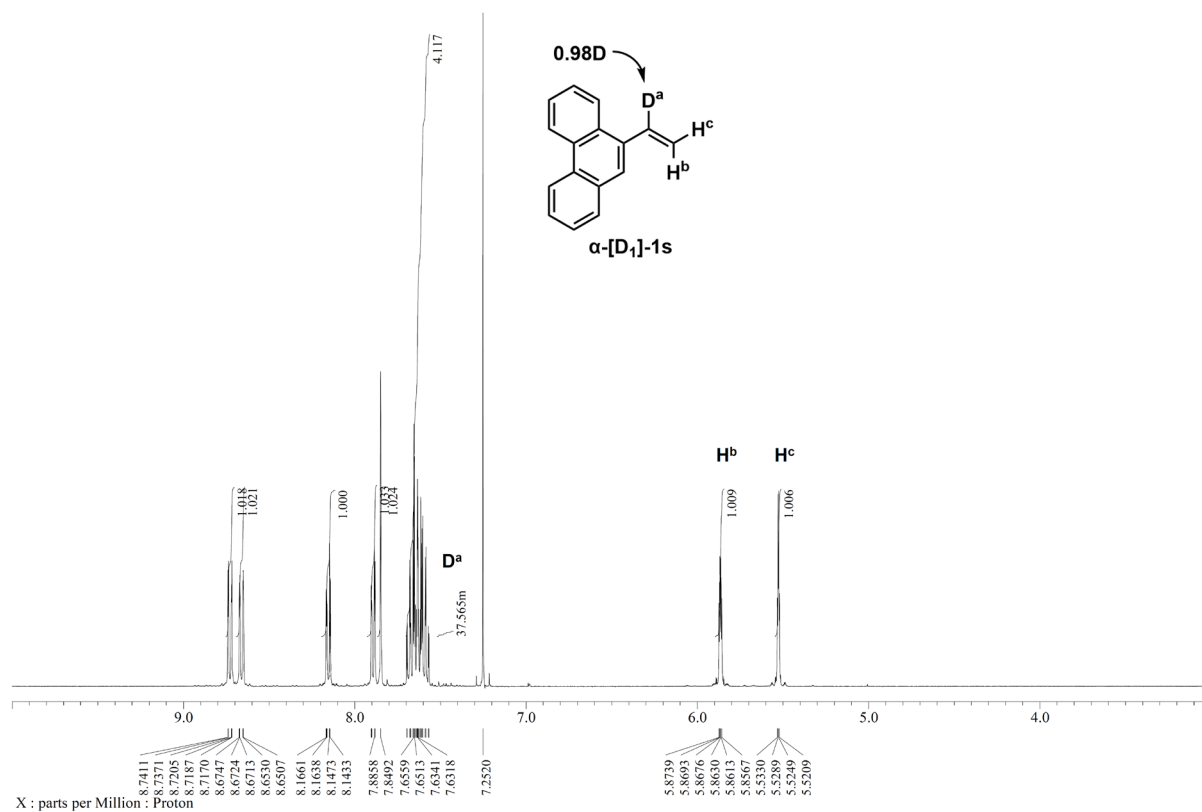

**Figure S14.** <sup>1</sup>H NMR spectrum of  $\alpha$ -[D<sub>1</sub>]-**1s** (400 MHz, CDCl<sub>3</sub>).

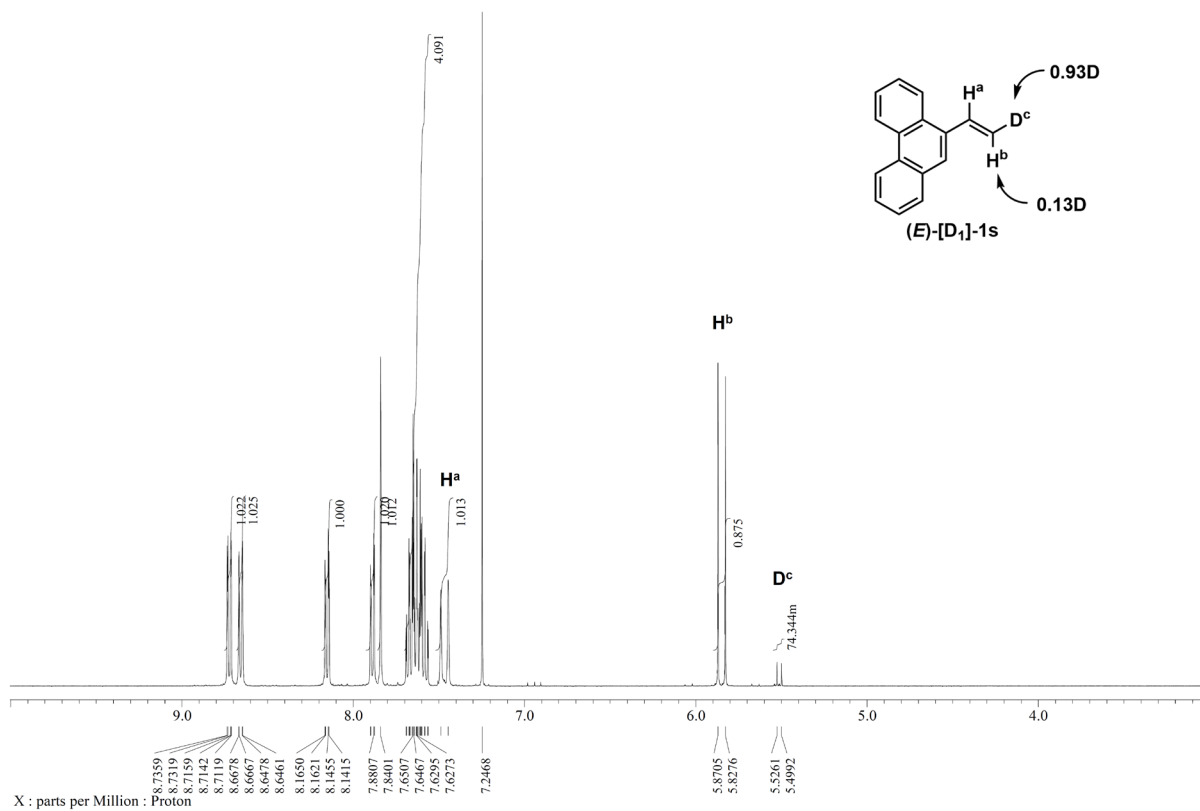

Figure S15. <sup>1</sup>H NMR spectrum of  $(E)$ -[D<sub>1</sub>]-1s (400 MHz, CDCl<sub>3</sub>).

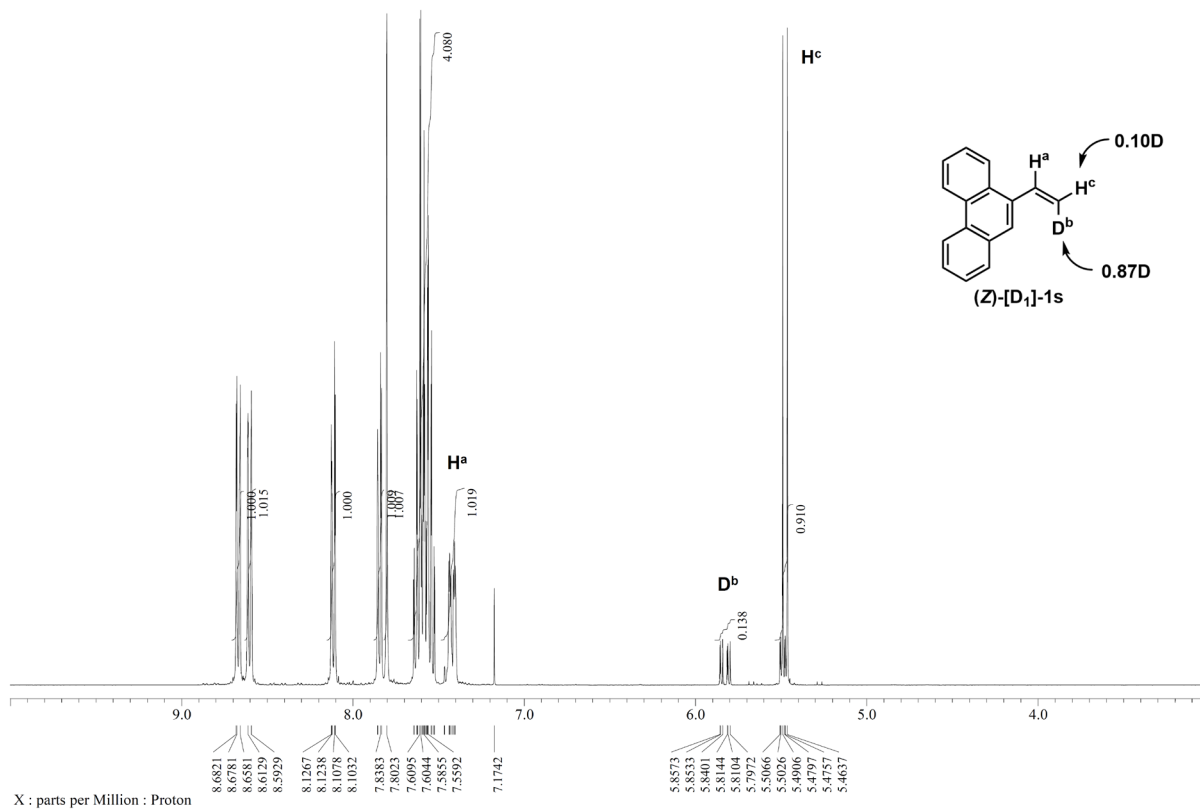

Figure S16. <sup>1</sup>H NMR spectrum of  $(Z)$ -[D<sub>1</sub>]-1s (400 MHz, CDCl<sub>3</sub>).



### Reaction of the deuterated substrate $\alpha$ -[D<sub>1</sub>]-**1s**.

The reaction of  $\alpha$ -[D<sub>1</sub>]-**1s** (61.6 mg, 0.3 mmol) with **2** was performed by following the General Procedure for the Pd-Catalyzed 1,1-Alkynylation of Alkenes under air for 48 h, giving the corresponding 1,1-alkynylation product [D<sub>1</sub>]-**3s** as a pale yellow oil (84.6 mg, 60% yield). The obtained [D<sub>1</sub>]-**3s** was analyzed by <sup>1</sup>H and <sup>2</sup>H NMR spectroscopies to confirm the incorporation of deuterium atoms (Figure S17 and S18). According to the <sup>1</sup>H NMR spectrum for **3s**, the integral of the aromatic proton's multiplet at 8.04–8.00 ppm was set to 1.00.

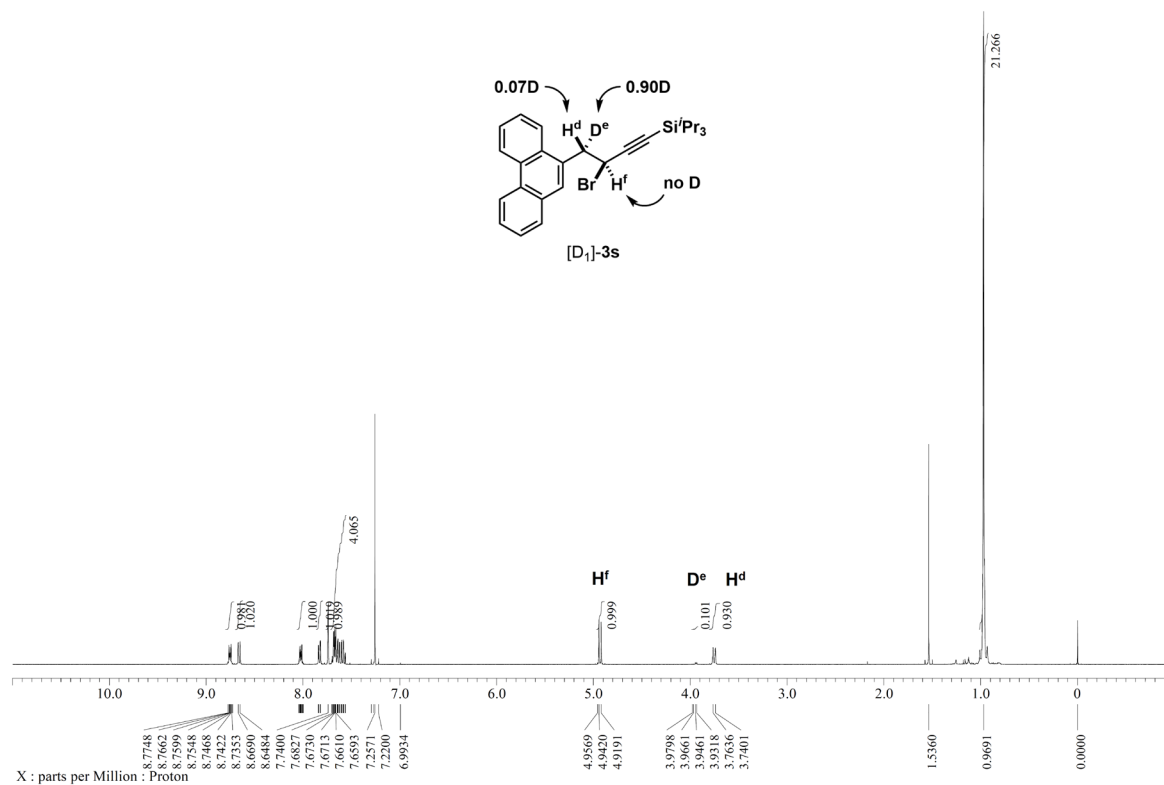

Figure S17. <sup>1</sup>H NMR spectrum of [D<sub>1</sub>]-**3s** (400 MHz, CDCl<sub>3</sub>).

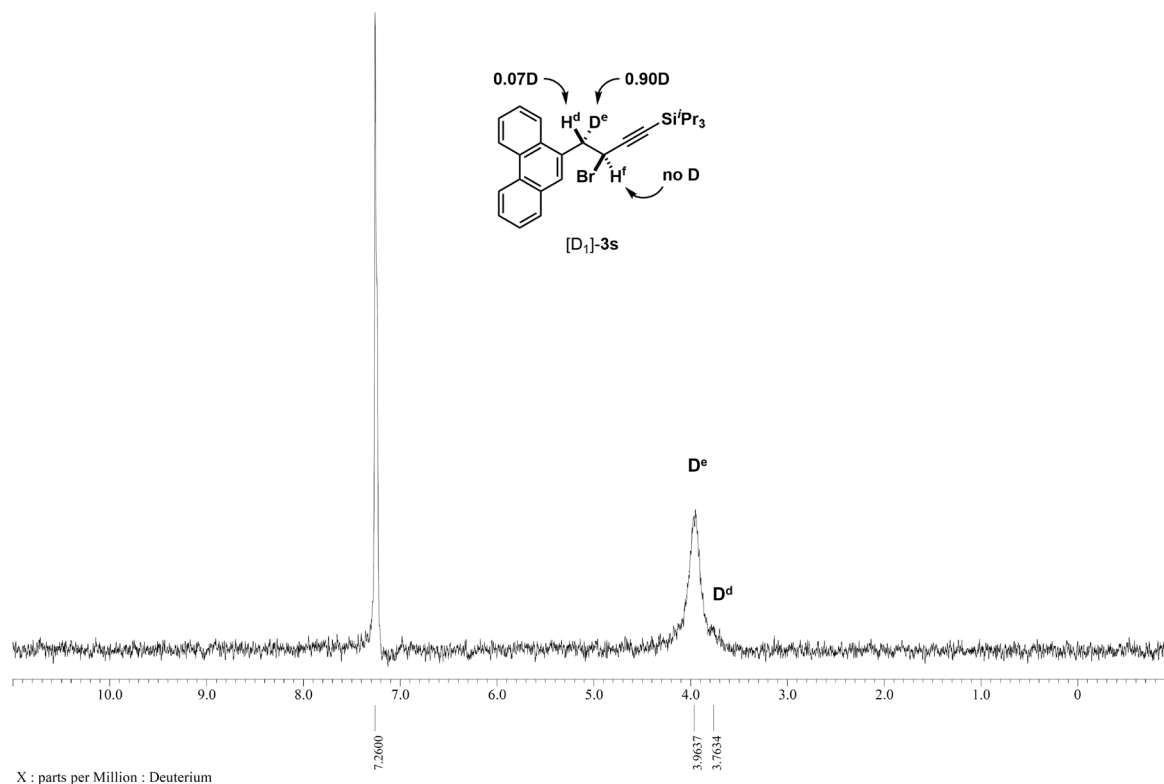

Figure S18. <sup>2</sup>H NMR spectrum of [D<sub>1</sub>]-**3s** (61 MHz, CHCl<sub>3</sub>/CDCl<sub>3</sub>).

### Reaction of the deuterated substrate (*E*)-[D<sub>1</sub>]-1s.

The reaction of (*E*)-[D<sub>1</sub>]-1s (61.6 mg, 0.3 mmol) with **2** was performed by following the General Procedure for the Pd-Catalyzed 1,1-Alkynylbromination of Alkenes under air for 48 h, giving the corresponding 1,1-alkynylbromination product [D<sub>1</sub>]-3s' as a pale yellow oil (52.9 mg, 38% yield). The obtained [D<sub>1</sub>]-3s' was analyzed by <sup>1</sup>H and <sup>2</sup>H NMR spectroscopies to confirm the incorporation of deuterium atoms (Figure S19 and S20). According to the <sup>1</sup>H NMR spectrum for **3s**, the integral of the aromatic proton's multiplet at 8.04–8.00 was set to 1.00.

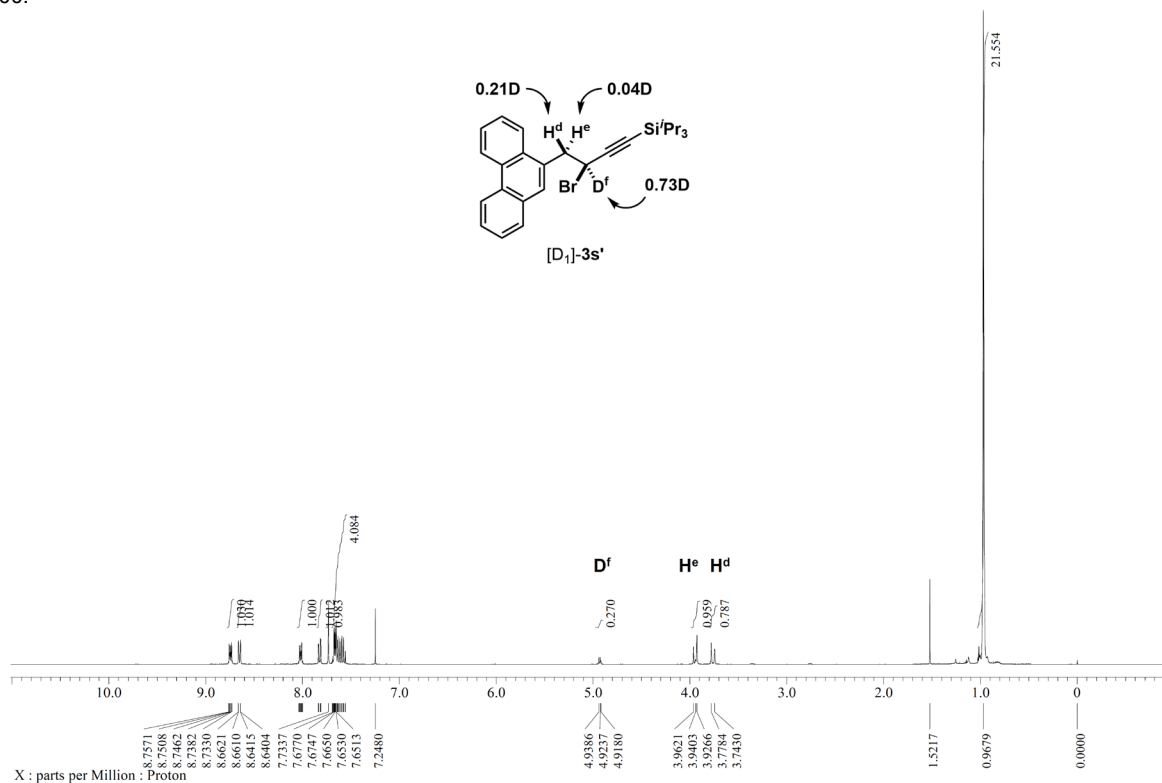

Figure S19. <sup>1</sup>H NMR spectrum of [D<sub>1</sub>]-3s' (400 MHz, CDCl<sub>3</sub>).

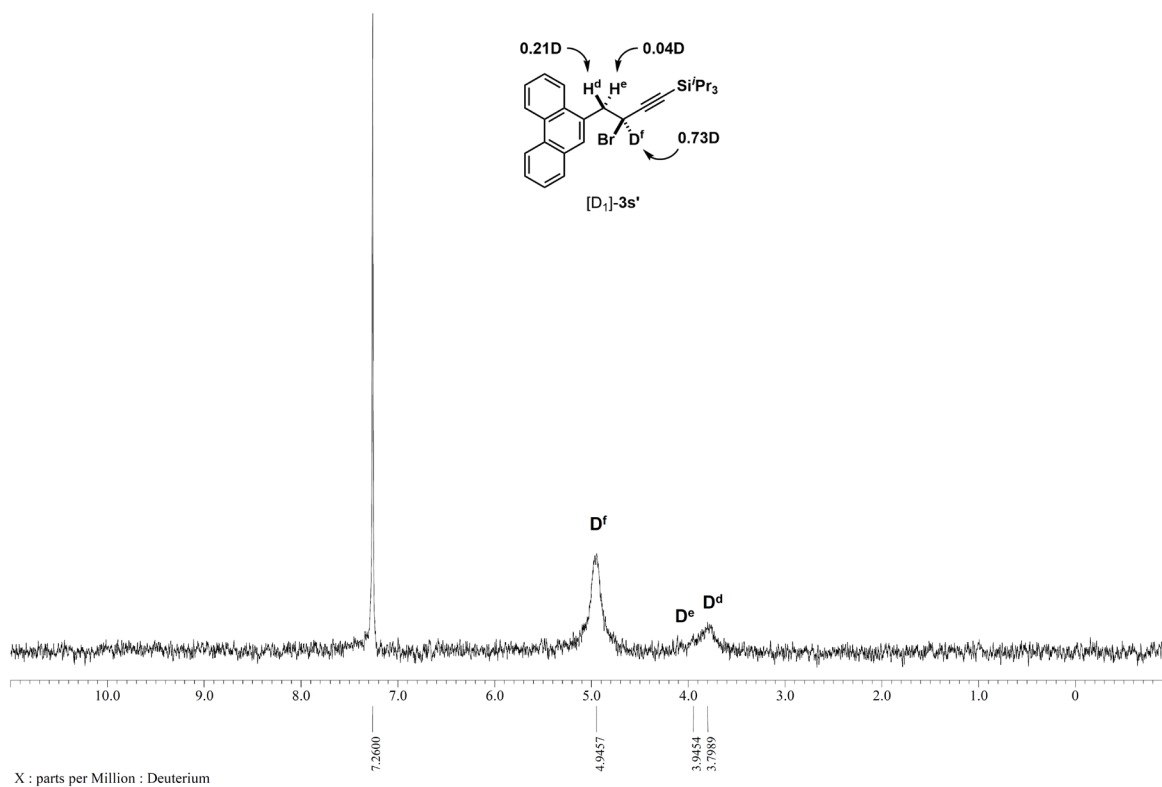

Figure S20. <sup>2</sup>H NMR spectrum of [D<sub>1</sub>]-3s' (61 MHz, CHCl<sub>3</sub>/CDCl<sub>3</sub>).

### Reaction of the deuterated substrate (Z)-[D<sub>1</sub>]-1s.

The reaction of (Z)-[D<sub>1</sub>]-1s (61.6 mg, 0.3 mmol) with **2** was performed by following the General Procedure for the Pd-Catalyzed 1,1-Alkynylbromination of Alkenes under air for 48 h, giving the corresponding 1,1-alkynylbromination product [D<sub>1</sub>]-3s'' as a colorless oil (59.4 mg, 42% yield). The obtained [D<sub>1</sub>]-3s'' was analyzed by <sup>1</sup>H and <sup>2</sup>H NMR spectroscopies to confirm the incorporation of deuterium atoms (Figure S21 and S22). According to the <sup>1</sup>H NMR spectrum for **3s**, the integral of the aromatic proton's multiplet at 8.04–8.00 ppm was set to 1.00.

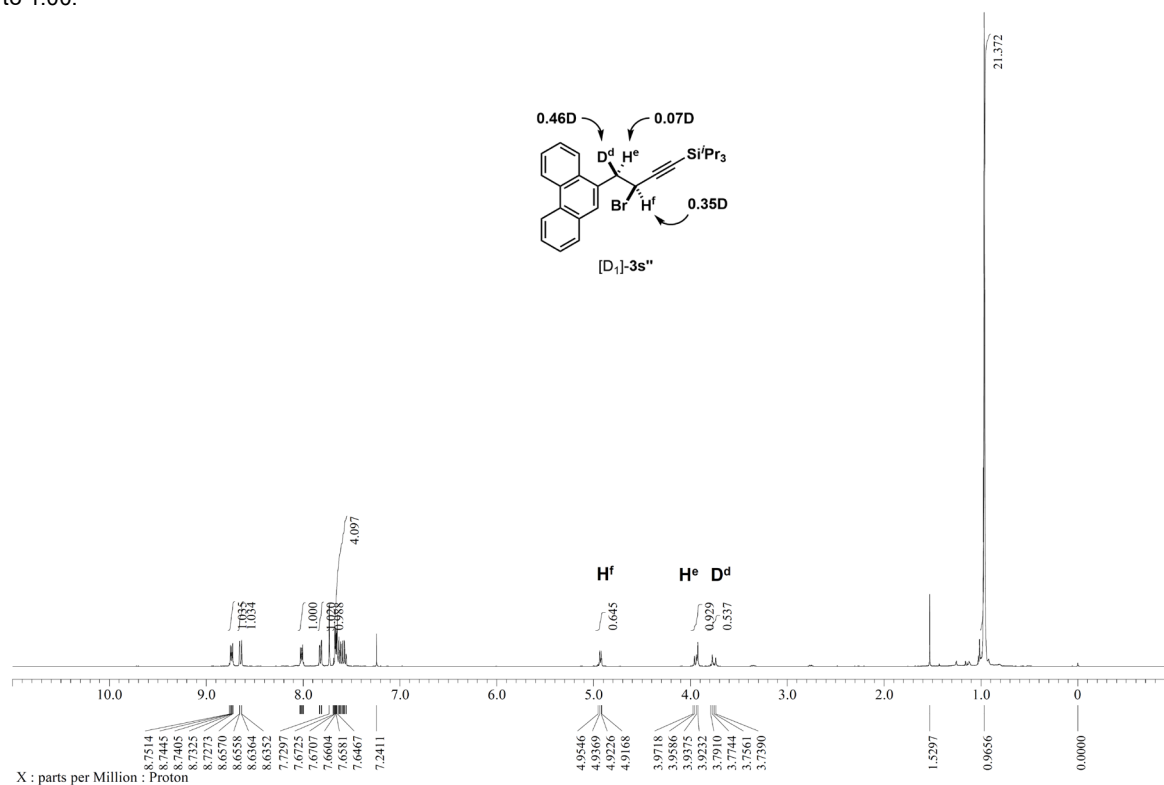

Figure S21. <sup>1</sup>H NMR spectrum of [D<sub>1</sub>]-3s'' (400 MHz, CDCl<sub>3</sub>).

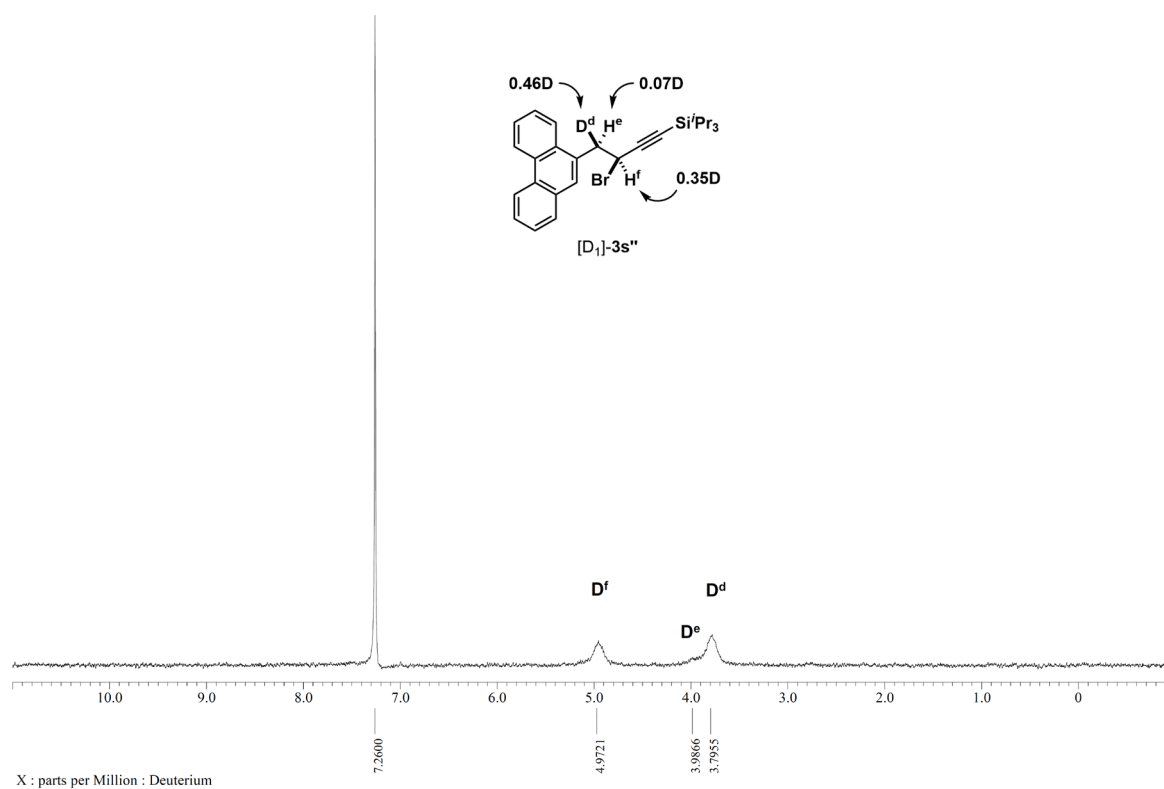

Figure S22. <sup>2</sup>H NMR spectrum of [D<sub>1</sub>]-3s'' (61 MHz, CHCl<sub>3</sub>/CDCl<sub>3</sub>).

## Deuterium scrambling in the reaction of (Z)-[D<sub>1</sub>]-1s.

The reaction of (Z)-[D<sub>1</sub>]-1s with **2** gave [D<sub>1</sub>]-3s with deuterium scrambling (Scheme 6f), indicating that another reaction pathway appears to be involved as a minor pathway in this reaction. When the reaction proceeds through the “proposed pathway”, the 1,1-alkynylbromination product **I** is formed via the migration of the deuterium atom at the β-carbon to the α-carbon. On the other hand, the “another pathway” proceeds via the β-hydride elimination to give *cis*-intermediate **II**, which gives 1,1-alkynylbromination product **III** with the deuterium at the β-carbon being retained. Although the formation of *cis*-alkene is a less favorable process, the cleavage of C–H bond may be preferable to that of C–D bond in the β-hydride elimination,<sup>17</sup> which supports the involvement of “another pathway”. Therefore, we propose that the progress of both pathways in parallel should provide the deuterium scrambling.

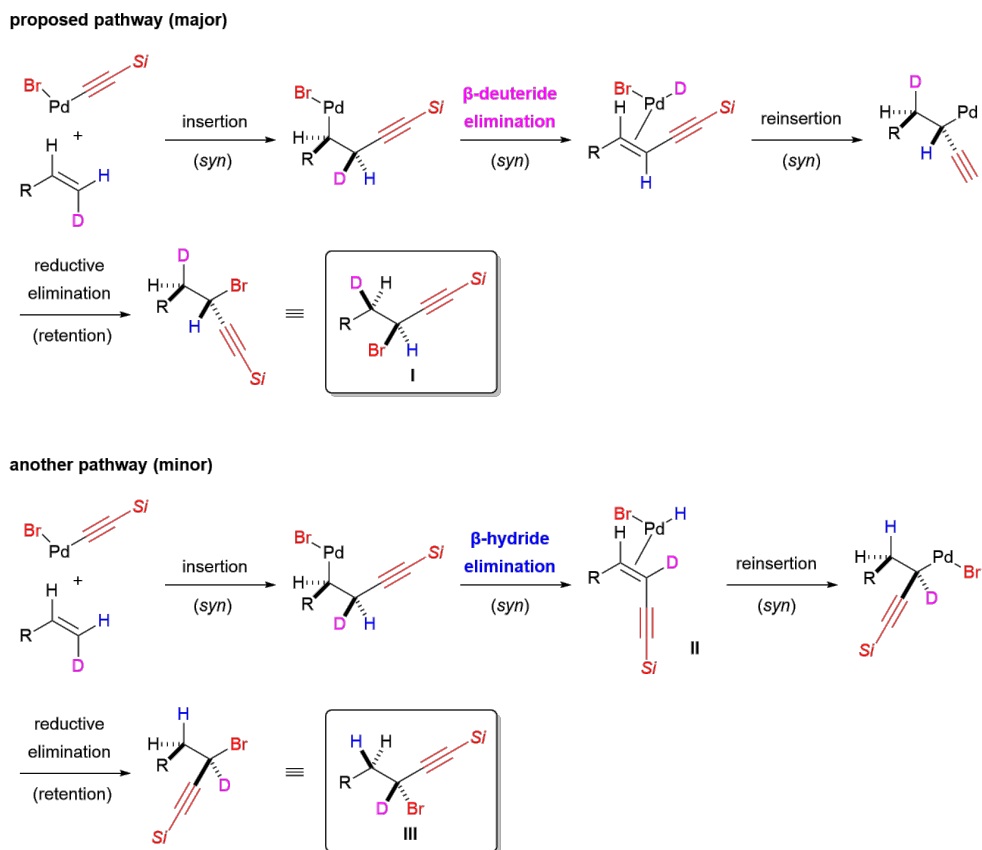

**Scheme S1.** Plausible reaction pathways for the reaction of (Z)-[D<sub>1</sub>]-1s (Si = Si<sup>i</sup>Pr<sub>3</sub>).

## Crossover Experiments

### Reaction of **1a** in the presence of **4z**.

Pd(OAc)<sub>2</sub> (0.7 mg, 0.03 mmol), (bromoethynyl)triisopropylsilane **2** (94.6 mg, 0.362 mmol), alkene **1a** (24.0 mg, 0.155 mmol), alkynylalkene **4z** (49.5 mg, 0.151 mmol) and toluene (1 mL) were successively added to a 10 mL-sample vial equipped with a Teflon-sealed screwcap under air. After stirring the mixture at 75 °C for 20 h, the resulting solution was filtered through a pad of celite and further eluted with EtOAc. The filtrate was concentrated under reduced pressure, and the resulting mixture was purified by preparative MPLC (flow rate: 40 mL/min) to obtain **3a** (33.6 mg, 52% yield) along with the 97% recovery of **4z** (48.1 mg).

### Reaction of **1z** in the presence of **4a**.

Pd(OAc)<sub>2</sub> (0.7 mg, 0.03 mmol), (bromoethynyl)triisopropylsilane **2** (96.8 mg, 0.370 mmol), alkene **1z** (23.2 mg, 0.157 mmol), alkynylalkene **4a** (51.5 mg, 0.153 mmol) and toluene (1 mL) were successively added to a 10 mL-sample vial equipped with a Teflon-sealed screwcap under air. After stirring the mixture at 75 °C for 20 h, the resulting solution was filtered through a pad of celite and further eluted with EtOAc. The filtrate was concentrated under reduced pressure, and the resulting mixture was purified by preparative MPLC (flow rate: 40 mL/min) to obtain **3z** (39.2 mg, 61% yield) along with the 81% recovery of **4a** (41.8 mg).

## 10. Computational Studies

### Computational Methods

All calculations were performed with the Gaussian 16<sup>18</sup> or the Gaussian 09<sup>19</sup> program. All geometry optimizations and normal coordinate analyses at stationary points were performed using B3LYP functional<sup>20</sup> with the LANL2DZ effective core potential for Pd and Br<sup>21</sup> and the 6-31G(d) basis set for the others.<sup>22</sup> Each reported minimum has no imaginary frequency and each transition state structure has one imaginary frequency. Intrinsic reaction coordinate (IRC) analyses<sup>23</sup> from transition states to minima were used for confirming the reaction pathways. For single-point energy calculations, the M06L functional<sup>24</sup> was conducted using def2-TZVP<sup>25</sup> as a basis set on all atoms. For both optimization and single-point energy calculation, the solvation effects of toluene ( $\epsilon = 2.3741$ ) were added using the integral equation formalism model (IEFPCM) calculation with radii and non-electrostatic terms for Truhlar and coworkers' solvation model based on density (SMD).<sup>26</sup> Energy values were shown by the used of Gibbs' free energies ( $T = 298.15$  K and  $p = 1$  atm).

**Table S2.** Calculated energies and imaginary frequencies for the reaction pathways in Figure 1.

| geometry                  | $E_{\text{SMD/B3LYP}}$ [Hartree] <sup>a</sup> | $H_{\text{corr-SMD/B3LYP}}$ [Hartree] <sup>b</sup> | $G_{\text{corr-SMD/B3LYP}}$ [Hartree] <sup>c</sup> | $E_{\text{SMD/M06L}}$ [Hartree] <sup>d</sup> | Im. Freq. [cm <sup>-1</sup> ] <sup>e</sup> |
|---------------------------|-----------------------------------------------|----------------------------------------------------|----------------------------------------------------|----------------------------------------------|--------------------------------------------|
| <b>INT0</b>               | -1622.52412578                                | 0.407435                                           | 0.286280                                           | -9306.69512925                               | —                                          |
| <b>2'</b>                 | -498.572671591                                | 0.133942                                           | 0.084157                                           | -3059.53882788                               | —                                          |
| <b>INT1</b>               | -1123.96186835                                | 0.272179                                           | 0.183227                                           | -6247.15922244                               | —                                          |
| <b>TS<sub>1-2</sub></b>   | -1123.93118543                                | 0.270889                                           | 0.181768                                           | -6247.11731235                               | -128.1859                                  |
| <b>INT2</b>               | -1123.95146610                                | 0.272260                                           | 0.180872                                           | -6247.13463498                               | —                                          |
| <b>1b</b>                 | -309.657014718                                | 0.141487                                           | 0.102676                                           | -309.717365858                               | —                                          |
| <b>INT3</b>               | -1433.62865388                                | 0.416468                                           | 0.309376                                           | -6556.89015178                               | —                                          |
| <b>TS<sub>3-4</sub></b>   | -1433.61020571                                | 0.415116                                           | 0.307819                                           | -6556.86867063                               | -384.7426                                  |
| <b>INT4</b>               | -1433.65456992                                | 0.417380                                           | 0.312559                                           | -6556.91284719                               | —                                          |
| <b>INT5</b>               | -1433.65964283                                | 0.417758                                           | 0.312749                                           | -6556.91463525                               | —                                          |
| <b>TS<sub>5-6</sub></b>   | -1433.62755961                                | 0.412111                                           | 0.306879                                           | -6556.88581901                               | -626.6273                                  |
| <b>INT6</b>               | -1433.63430160                                | 0.413985                                           | 0.307243                                           | -6556.89490491                               | —                                          |
| <b>INT7</b>               | -1433.63540101                                | 0.414190                                           | 0.306521                                           | -6556.89442218                               | —                                          |
| <b>TS<sub>7-8</sub></b>   | -1433.62695620                                | 0.412052                                           | 0.306257                                           | -6556.88287466                               | -583.4155                                  |
| <b>INT8</b>               | -1433.66159020                                | 0.417520                                           | 0.310591                                           | -6556.91376528                               | —                                          |
| <b>INT9</b>               | -1433.66777419                                | 0.417573                                           | 0.312869                                           | -6556.92525902                               | —                                          |
| <b>TS<sub>9-10</sub></b>  | -1433.63416456                                | 0.415543                                           | 0.308731                                           | -6556.88772763                               | -109.9679                                  |
| <b>INT10</b>              | -1433.66061134                                | 0.417587                                           | 0.310585                                           | -6556.91446106                               | —                                          |
| <b>3b'</b>                | -808.279588560                                | 0.279709                                           | 0.209962                                           | -3369.29652852                               | —                                          |
| <b>INT11</b>              | -1433.65472398                                | 0.417297                                           | 0.308366                                           | -6556.90879424                               | —                                          |
| <b>TS<sub>11-12</sub></b> | -1433.62272751                                | 0.416065                                           | 0.310860                                           | -6556.87820743                               | -127.2876                                  |
| <b>INT12</b>              | -1433.63913360                                | 0.417671                                           | 0.308244                                           | -3807.07286684                               | —                                          |

(a) The electronic energy calculated by B3LYP in toluene solvent. (b) The thermal correction to enthalpy calculated by B3LYP in toluene solvent. (c) The thermal correction to Gibbs free energy calculated by B3LYP in toluene solvent. (d) The electronic energy calculated by M06L in toluene solvent. (e) The B3LYP calculated imaginary frequencies for the transition states.

## Natural Bond Orbital (NBO) Analysis<sup>27</sup> of TS<sub>11-12</sub>

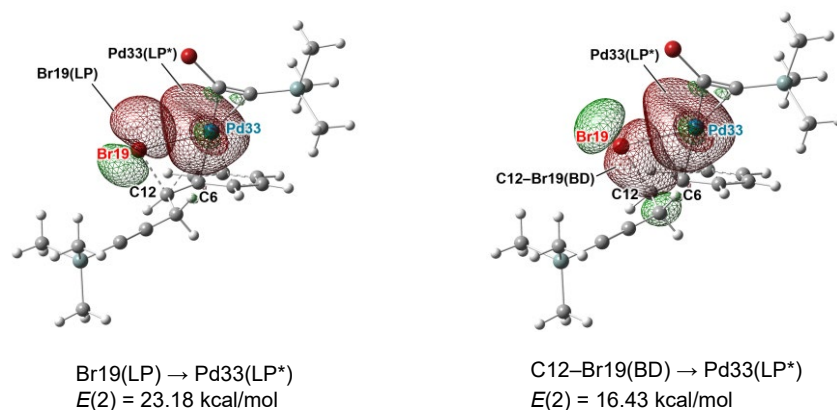

**Figure S23.** Representative donor-acceptor interactions among Pd, Br, and C(benzyl) atoms in TS<sub>11-12</sub> based on NBO analysis.

We evaluated the transition state for the reductive elimination of C(benzyl)–Br bond (TS<sub>11-12</sub>) using an NBO analysis. The NBO analysis revealed a donor-acceptor interaction from the lone pair of the Br19 atom to the s-orbital of the Pd33 atom. In addition, an interaction from the  $\sigma$ -orbital of C12–Br19 to s-orbital of Pd33 atom was also involved in TS<sub>11-12</sub>. These results indicate that Pd, Br, and C12 (e.g. C(benzyl)) atoms interact with each other to produce a three-membered transition state.

## DFT Studies on the Reaction Pathway Catalyzed by a Pd-Alkene Complex

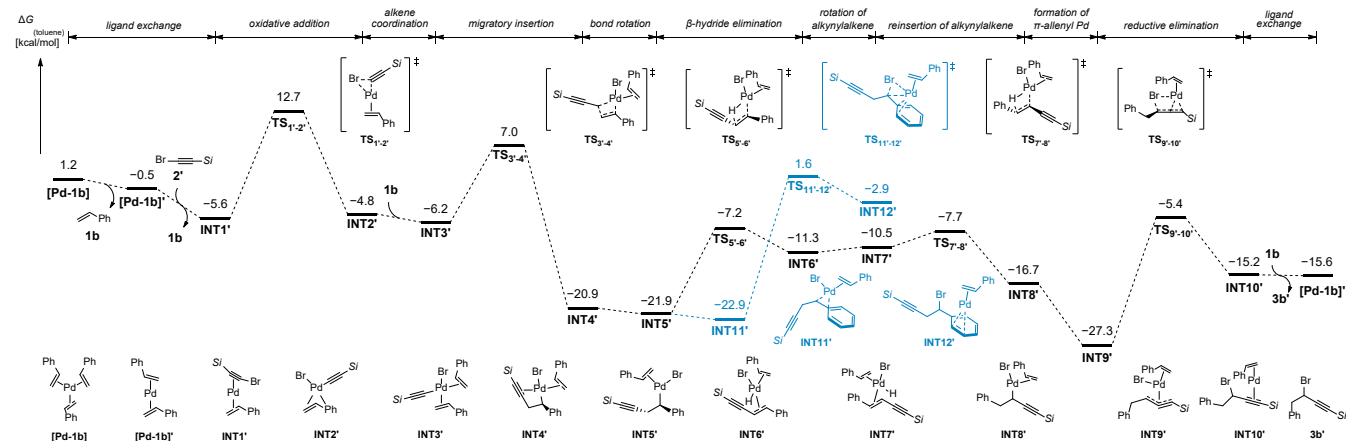

**Figure S24.** Gibbs free energy profiles for the Pd-catalyzed 1,1-alkynylbromination of **1b** with **2'** involving Pd(0)-alkene complexes (Si = SiMe<sub>3</sub>).

**Table S3.** Calculated energies and imaginary frequencies for the reaction pathways in Figure S14.

| geometry            | $E_{\text{SMD/B3LYP}}$ [Hartree] <sup>a</sup> | $H_{\text{corr-SMD/B3LYP}}$ [Hartree] <sup>b</sup> | $G_{\text{corr-SMD/B3LYP}}$ [Hartree] <sup>c</sup> | $E_{\text{SMD/M06L}}$ [Hartree] <sup>d</sup> | Im. Freq. [cm <sup>-1</sup> ] <sup>e</sup> |
|---------------------|-----------------------------------------------|----------------------------------------------------|----------------------------------------------------|----------------------------------------------|--------------------------------------------|
| [Pd-1b]             | -1055.75336742                                | 0.430777                                           | 0.345447                                           | -1057.23257239                               | —                                          |
| [Pd-1b]'            | -746.097414421                                | 0.287447                                           | 0.220504                                           | -747.496113004                               | —                                          |
| INT1'               | -935.028559303                                | 0.279685                                           | 0.200615                                           | -3497.32586218                               | —                                          |
| TS <sub>1'-2'</sub> | -935.009911185                                | 0.278819                                           | 0.201949                                           | -3497.29613802                               | -89.5467                                   |
| INT2'               | -935.038102328                                | 0.280424                                           | 0.203132                                           | -3497.32448122                               | —                                          |
| INT3'               | -1244.70822141                                | 0.425121                                           | 0.329717                                           | -3807.06824904                               | —                                          |
| TS <sub>3'-4'</sub> | -1244.68980276                                | 0.423569                                           | 0.327127                                           | -3807.04579097                               | -385.5448                                  |
| INT4'               | -1244.73540964                                | 0.425688                                           | 0.332742                                           | -3807.09260150                               | —                                          |
| INT5'               | -1244.73839087                                | 0.425787                                           | 0.330954                                           | -3807.09302914                               | —                                          |

|                             |                |          |          |                |           |
|-----------------------------|----------------|----------|----------|----------------|-----------|
| <b>TS<sub>5-6</sub>'</b>    | -1244.70946938 | 0.420297 | 0.325035 | -3807.06492100 | -599.8996 |
| <b>INT6'</b>                | -1244.71690750 | 0.422075 | 0.326327 | -3807.07286684 | —         |
| <b>INT7'</b>                | -1244.71670483 | 0.422147 | 0.326039 | -3807.07234863 | —         |
| <b>TS<sub>7-8</sub>'</b>    | -1244.71184001 | 0.420393 | 0.325001 | -3807.06537363 | -575.2267 |
| <b>INT8'</b>                | -1244.73188258 | 0.424768 | 0.327556 | -3807.08482427 | —         |
| <b>INT9'</b>                | -1244.74722898 | 0.425808 | 0.331543 | -3807.10339096 | —         |
| <b>TS<sub>9-10</sub>'</b>   | -1244.71070872 | 0.423281 | 0.329331 | -3807.06722230 | -127.3847 |
| <b>INT10'</b>               | -1244.72871178 | 0.425121 | 0.328418 | -3807.08428659 | —         |
| <b>INT11'</b>               | -1244.74208352 | 0.425800 | 0.331663 | -3807.09522091 | —         |
| <b>TS<sub>11'-12'</sub></b> | -1244.69810978 | 0.423553 | 0.330969 | -3807.05566665 | -128.3470 |
| <b>INT12'</b>               | -1244.71095956 | 0.425069 | 0.327109 | -3807.06290649 | —         |

(a) The electronic energy calculated by B3LYP in toluene solvent. (b) The thermal correction to enthalpy calculated by B3LYP in toluene solvent. (c) The thermal correction to Gibbs y calculated by B3LYP in toluene solvent. (d) The electronic energy calculated by M06L in toluene solvent. (e) The B3LYP calculated imaginary frequencies for the transition states.

### Optimized Geometries for All Intermediates and Transition States

|             |             |             |             |             |             |             |             |
|-------------|-------------|-------------|-------------|-------------|-------------|-------------|-------------|
| <b>INT0</b> |             |             |             | H           | -5.24845100 | 2.01607000  | 1.53712200  |
| Pd          | -0.18362100 | -0.13533200 | 0.01318700  | H           | -4.64547900 | 0.48832500  | 2.20331100  |
| C           | 0.32001500  | 1.95185100  | 0.70813900  | H           | -3.57884100 | 1.89861900  | 2.11821000  |
| C           | 0.82439100  | 2.12660600  | -0.41060400 | C           | -5.22320900 | -0.11478500 | -0.99924900 |
| C           | 1.49946900  | -1.38521000 | -0.73812200 | H           | -6.11128600 | 0.52070600  | -1.11603500 |
| C           | 2.05181500  | -1.18452700 | 0.35520400  | H           | -4.92204900 | -0.45268000 | -1.99846800 |
| C           | -1.75412800 | -1.42106200 | 0.11945200  | H           | -5.52089600 | -1.00050000 | -0.42487100 |
| C           | -2.37256200 | -0.31400500 | 0.01108100  | C           | -3.34004200 | 2.33567600  | -1.16942500 |
| Br          | 1.37422900  | -2.18366800 | -2.43622200 | H           | -3.04243400 | 2.03852000  | -2.18261900 |
| Br          | -0.18116700 | 2.49529500  | 2.43585300  | H           | -4.17943400 | 3.03752800  | -1.26077400 |
| Br          | -1.99323900 | -3.32003100 | 0.28053100  | H           | -2.49788200 | 2.87385300  | -0.71895500 |
| Si          | -3.82720100 | 0.83060700  | -0.14061000 |             |             |             |             |
| Si          | 3.00494300  | -1.11671300 | 1.94992500  | <b>2'</b>   |             |             |             |
| Si          | 1.57925400  | 2.64860400  | -2.02880700 | C           | -0.97267200 | 0.00011800  | -0.00019400 |
| C           | 0.43300600  | 2.14028500  | -3.43496500 | C           | 0.24515200  | -0.00004400 | -0.00015700 |
| H           | -0.55301300 | 2.60797300  | -3.32799100 | Si          | 2.09712300  | -0.00001500 | -0.00000700 |
| H           | 0.84877600  | 2.45320500  | -4.40175300 | C           | 2.68409000  | 1.17592400  | -1.35357200 |
| H           | 0.28526500  | 1.05511000  | -3.46801400 | H           | 3.78101900  | 1.20636000  | -1.38925000 |
| C           | 3.28403000  | 1.86094000  | -2.19227500 | H           | 2.32769900  | 0.86173300  | -2.34199000 |
| H           | 3.74370900  | 2.14219700  | -3.14889800 | H           | 2.32836000  | 2.19868400  | -1.18004500 |
| H           | 3.95319100  | 2.19616600  | -1.39074000 | C           | 2.68392300  | -1.76029500 | -0.34145700 |
| H           | 3.23570300  | 0.76743600  | -2.15154300 | H           | 3.78084700  | -1.80665400 | -0.35004500 |
| C           | 1.73027000  | 4.53066400  | -1.94784800 | H           | 2.32744400  | -2.45897900 | 0.42500500  |
| H           | 2.36728600  | 4.84922600  | -1.11396200 | H           | 2.32807700  | -2.12152700 | -1.31387400 |
| H           | 2.17503000  | 4.91866900  | -2.87385600 | C           | 2.68371500  | 0.58436300  | 1.69523900  |
| H           | 0.75113300  | 5.00848300  | -1.82352800 | H           | 3.78063400  | 0.59959000  | 1.73986000  |
| C           | 4.32746700  | -2.46115300 | 1.82868600  | H           | 2.32766100  | 1.59767900  | 1.91680000  |
| H           | 4.93488700  | -2.48394900 | 2.74331000  | H           | 2.32741400  | -0.07687500 | 2.49431000  |
| H           | 3.88007300  | -3.45413800 | 1.70105600  | Br          | -2.81754600 | -0.00000600 | 0.00000500  |
| H           | 5.00445500  | -2.28698900 | 0.98367200  |             |             |             |             |
| C           | 3.81139800  | 0.57926800  | 2.11812800  | <b>INT1</b> |             |             |             |
| H           | 3.07327800  | 1.38831800  | 2.09901200  | Pd          | 0.00034200  | -0.00692600 | -0.15579200 |
| H           | 4.36054900  | 0.64799700  | 3.06640300  | C           | -1.84767500 | 0.72353100  | -0.65695200 |
| H           | 4.52668900  | 0.75963300  | 1.30661200  | C           | -2.13063800 | -0.09833300 | 0.25845500  |
| C           | 1.82552100  | -1.47910000 | 3.37414100  | Br          | -2.40608000 | 2.00323600  | -1.94004400 |
| H           | 1.34766500  | -2.45827900 | 3.24903800  | Si          | -2.96571100 | -1.19669400 | 1.51180900  |
| H           | 2.36552400  | -1.48899100 | 4.33007400  | C           | -4.82426700 | -0.87607100 | 1.40473100  |
| H           | 1.02990900  | -0.72900800 | 3.44474700  | H           | -5.36694000 | -1.50329800 | 2.12432000  |
| C           | -4.37220300 | 1.35637600  | 1.59099400  | H           | -5.06548900 | 0.17040400  | 1.62730700  |

|                         |             |             |             |             |             |             |             |
|-------------------------|-------------|-------------|-------------|-------------|-------------|-------------|-------------|
| H                       | -5.21380900 | -1.10371700 | 0.40508800  | C           | -3.01786000 | 0.12459700  | -0.28126000 |
| C                       | -2.30371100 | -0.74762700 | 3.21972500  | Br          | -0.06814100 | -0.48659600 | 2.30106800  |
| H                       | -2.78519900 | -1.35820600 | 3.99476500  | Si          | -4.83736300 | 0.27429900  | -0.53715900 |
| H                       | -1.22225900 | -0.91689500 | 3.28449900  | C           | -5.31982400 | 2.09609200  | -0.39857000 |
| H                       | -2.49350100 | 0.30565300  | 3.45986100  | H           | -6.40108300 | 2.22557600  | -0.53956500 |
| C                       | -2.56293700 | -2.98637700 | 1.07654500  | H           | -5.06084100 | 2.50382400  | 0.58611900  |
| H                       | -1.48255700 | -3.17082100 | 1.11201700  | H           | -4.81018400 | 2.70500000  | -1.15534600 |
| H                       | -3.04527400 | -3.67623600 | 1.78134700  | C           | -5.71413800 | -0.74010100 | 0.79345900  |
| H                       | -2.91172300 | -3.24110900 | 0.06837700  | H           | -6.80433700 | -0.67446400 | 0.67917500  |
| C                       | 2.13083800  | 0.11708900  | 0.25195100  | H           | -5.43512900 | -1.79925800 | 0.73732300  |
| C                       | 1.84958100  | -0.77189900 | -0.59902700 | H           | -5.46068500 | -0.38332900 | 1.79899900  |
| Br                      | 2.40979300  | -2.14477400 | -1.78076300 | C           | -5.26899700 | -0.38600900 | -2.25466800 |
| Si                      | 2.96266300  | 1.30915300  | 1.41891800  | H           | -4.97926200 | -1.43839700 | -2.36266000 |
| C                       | 2.59365100  | 3.05886400  | 0.82130200  | H           | -6.34914000 | -0.31721800 | -2.43989500 |
| H                       | 2.96296600  | 3.21938300  | -0.19888600 | H           | -4.75947400 | 0.18192400  | -3.04276800 |
| H                       | 1.51563700  | 3.25979600  | 0.82114100  | C           | 2.41591500  | 0.36807600  | -0.45083100 |
| H                       | 3.07412900  | 3.80162700  | 1.47150700  | C           | 2.22494000  | -0.84936100 | -0.58094300 |
| C                       | 4.81751300  | 0.95457000  | 1.37201100  | Br          | 2.50794900  | -2.66752300 | -0.81953300 |
| H                       | 5.03883000  | -0.07173000 | 1.68917500  | Si          | 2.94267100  | 2.16845500  | -0.30773200 |
| H                       | 5.22634600  | 1.08833200  | 0.36314600  | C           | 1.57580800  | 3.22782200  | -1.05169800 |
| H                       | 5.35837900  | 1.63464300  | 2.04333400  | H           | 1.38633900  | 2.96802700  | -2.10035000 |
| C                       | 2.26716600  | 1.02108600  | 3.14806700  | H           | 0.63387500  | 3.12247900  | -0.49988000 |
| H                       | 2.74682500  | 1.68942800  | 3.87509000  | H           | 1.85924200  | 4.28806000  | -1.01997100 |
| H                       | 1.18780300  | 1.21178100  | 3.17958500  | C           | 4.54116500  | 2.30062700  | -1.29779600 |
| H                       | 2.43566300  | -0.01003600 | 3.48196100  | H           | 5.31906500  | 1.63897400  | -0.89884300 |
|                         |             |             |             | H           | 4.38670700  | 2.04372800  | -2.35242400 |
|                         |             |             |             | H           | 4.92493000  | 3.32849600  | -1.25772100 |
| <b>TS<sub>1,2</sub></b> |             |             |             | C           | 3.21210200  | 2.53593600  | 1.51633700  |
| Pd                      | -0.25867500 | -0.24461700 | -0.00123900 | H           | 3.54875800  | 3.57271200  | 1.64689500  |
| C                       | 1.64162500  | -0.68763300 | -0.00050700 | H           | 2.29022600  | 2.40705100  | 2.09445100  |
| C                       | 2.76126600  | -0.15603600 | -0.00217500 | H           | 3.97529200  | 1.87915400  | 1.95014000  |
| Br                      | 0.77165600  | -2.73776000 | 0.00671200  |             |             |             |             |
| Si                      | 4.41613600  | 0.66211200  | -0.00403300 | <b>1b</b>   |             |             |             |
| C                       | 5.70992600  | -0.66255100 | 0.37237200  | C           | 1.95532100  | -0.53031200 | -0.00023500 |
| H                       | 6.71681600  | -0.22444600 | 0.38348500  | H           | 2.18735200  | -1.59562500 | -0.00075400 |
| H                       | 5.53624700  | -1.12623300 | 1.35077000  | C           | 2.97692400  | 0.33558400  | 0.00032100  |
| H                       | 5.70051000  | -1.45913400 | -0.38112800 | H           | 2.84054400  | 1.41424300  | 0.00095900  |
| C                       | 4.43448100  | 1.99937200  | 1.32929600  | H           | 4.00457900  | -0.01682800 | 0.00019300  |
| H                       | 5.41335600  | 2.49520300  | 1.36893900  | C           | 0.51524000  | -0.22110700 | -0.00015200 |
| H                       | 3.67878400  | 2.77056500  | 1.13621700  | C           | 0.00958300  | 1.09269300  | -0.00021100 |
| H                       | 4.23417500  | 1.57682000  | 2.32132200  | C           | -0.40699200 | -1.28226600 | 0.00000000  |
| C                       | 4.71794600  | 1.41776700  | -1.70766300 | C           | -1.36180900 | 1.33019700  | -0.00006400 |
| H                       | 3.96693000  | 2.17990800  | -1.94874700 | C           | -1.78156800 | -1.04604500 | 0.00014500  |
| H                       | 5.70483900  | 1.89704000  | -1.75142500 | C           | -2.26548300 | 0.26251000  | 0.00012700  |
| H                       | 4.68264800  | 0.65486000  | -2.49475100 | H           | 0.69512600  | 1.93530100  | -0.00041600 |
| C                       | -2.17841100 | 0.98027000  | -0.00084000 | H           | -0.03638500 | -2.30500200 | 0.00002900  |
| C                       | -2.46805400 | -0.23123900 | -0.00281200 | H           | -1.72966000 | 2.35313100  | -0.00011400 |
| Br                      | -3.60460300 | -1.71470400 | -0.00549500 | H           | -2.47323700 | -1.88458400 | 0.00027700  |
| Si                      | -2.06683900 | 2.84695300  | 0.00305300  | H           | -3.33561700 | 0.45184000  | 0.00024200  |
| C                       | -1.14320600 | 3.37100000  | 1.55939300  |             |             |             |             |
| H                       | -1.64847300 | 3.01381600  | 2.46477600  | <b>INT3</b> |             |             |             |
| H                       | -0.11900300 | 2.97912400  | 1.57106500  | C           | -2.51173600 | 4.36970300  | -0.07486200 |
| H                       | -1.08261300 | 4.46546800  | 1.62041500  | C           | -1.36712000 | 3.65512000  | 0.26952400  |
| C                       | -3.84179000 | 3.48682000  | 0.00929900  | C           | -3.76384300 | 3.92673300  | 0.35686200  |
| H                       | -4.39373900 | 3.15080900  | -0.87656100 | H           | -0.39318400 | 4.00610700  | -0.06144500 |
| H                       | -4.38916700 | 3.14594500  | 0.89614000  | H           | -4.65899000 | 4.48367700  | 0.09390000  |
| H                       | -3.85214200 | 4.58478400  | 0.01233700  | C           | -1.45303100 | 2.48108900  | 1.04177500  |
| C                       | -1.15158000 | 3.37788300  | -1.55593600 | C           | -3.86362000 | 2.76896900  | 1.13627800  |
| H                       | -1.09057600 | 4.47258500  | -1.61205900 | H           | -4.83566000 | 2.42863000  | 1.48208200  |
| H                       | -0.12772200 | 2.98539000  | -1.57500400 | C           | -2.72195100 | 2.05057400  | 1.47608400  |
| H                       | -1.66203700 | 3.02532400  | -2.46022000 | H           | -2.81220700 | 1.15710900  | 2.08332100  |
|                         |             |             |             | H           | -2.42726000 | 5.27114300  | -0.67501200 |
| <b>INT2</b>             |             |             |             | C           | -0.21316400 | 1.79532100  | 1.41091700  |
| Pd                      | 0.12507300  | -0.09404300 | -0.14859200 | C           | -0.06664400 | 0.61532000  | 2.11360700  |
| C                       | -1.79665500 | 0.03386100  | -0.16297800 |             |             |             |             |



|                         |             |             |             |             |             |             |             |
|-------------------------|-------------|-------------|-------------|-------------|-------------|-------------|-------------|
| H                       | 0.88948200  | 0.38952700  | 2.57393800  | H           | 5.21029500  | -2.13626000 | 0.63558000  |
| H                       | 0.69386900  | 2.36291600  | 1.21212300  | H           | 5.39150400  | -2.10100600 | -1.12445400 |
| H                       | -0.91988300 | 0.05663800  | 2.48149200  | C           | 5.50775500  | 1.08880500  | 1.39005100  |
| C                       | -1.42542300 | -0.86435000 | -0.01393900 | H           | 5.05842800  | 0.58886100  | 2.25638500  |
| C                       | -2.57416400 | -1.30065900 | -0.01044200 | H           | 6.59626600  | 1.09732500  | 1.53434900  |
| Br                      | 0.87247500  | -1.73028800 | -1.94208300 | H           | 5.16267600  | 2.13005100  | 1.39140500  |
| Si                      | -4.26906200 | -1.99898600 | -0.09386200 | Pd          | 0.05820500  | -0.24077700 | -0.08826300 |
| C                       | -5.05691600 | -1.96237400 | 1.62859200  | C           | -2.09839800 | -0.31152500 | 0.65471000  |
| H                       | -6.06254800 | -2.40324800 | 1.60754100  | C           | -2.11785600 | -1.17637500 | -0.23154400 |
| H                       | -4.46200700 | -2.53146400 | 2.35390300  | Si          | -2.41953900 | -2.61881500 | -1.38861100 |
| H                       | -5.15481100 | -0.93796600 | 2.00952600  | C           | -4.27984000 | -2.62623900 | -1.70922100 |
| C                       | -4.17528500 | -3.78637700 | -0.70222100 | H           | -4.54894300 | -3.46753900 | -2.36136900 |
| H                       | -5.17585600 | -4.23357800 | -0.77354300 | H           | -4.84715600 | -2.73419900 | -0.77713800 |
| H                       | -3.71091800 | -3.84221600 | -1.69415200 | H           | -4.61294000 | -1.70425300 | -2.20083900 |
| H                       | -3.57851200 | -4.40846700 | -0.02385200 | C           | -1.46627100 | -2.34766900 | -2.99232800 |
| C                       | -5.30681300 | -0.96297400 | -1.28843100 | H           | -0.38510900 | -2.29879700 | -2.81733800 |
| H                       | -4.87996100 | -0.97998400 | -2.29863700 | H           | -1.64997300 | -3.18663500 | -3.67656200 |
| H                       | -6.33445900 | -1.34502400 | -1.35262700 | H           | -1.77511800 | -1.43193000 | -3.51099700 |
| H                       | -5.35767000 | 0.08548600  | -0.97016000 | C           | -1.85818500 | -4.18387100 | -0.51236800 |
| Pd                      | 0.40318500  | -0.19928400 | 0.04047000  | H           | -0.79678000 | -4.13184200 | -0.24689700 |
| C                       | 2.45749700  | 0.91207700  | -0.33454600 | H           | -2.42236600 | -4.34555300 | 0.41361400  |
| C                       | 2.78727700  | 0.02925700  | 0.46281600  | H           | -2.01002400 | -5.05912700 | -1.15775500 |
| Si                      | 3.64599500  | -1.28785600 | 1.49671500  | Br          | -2.63818600 | 0.74102300  | 2.08139700  |
| C                       | 4.83443500  | -0.35535400 | 2.62713500  |             |             |             |             |
| H                       | 5.40809600  | -1.06374500 | 3.23910200  | <b>INT4</b> |             |             |             |
| H                       | 5.55123700  | 0.24417100  | 2.05344100  | C           | 2.71592100  | 3.94738700  | 0.66307700  |
| H                       | 4.30343000  | 0.31828200  | 3.31064600  | C           | 2.34576500  | 2.69207600  | 1.13540200  |
| C                       | 2.38264600  | -2.26211800 | 2.49437600  | C           | 1.73796800  | 4.89533300  | 0.34520900  |
| H                       | 1.61112900  | -2.70342800 | 1.85347900  | H           | 3.11046000  | 1.96168500  | 1.38772300  |
| H                       | 2.89019800  | -3.08368300 | 3.01739100  | H           | 2.02671400  | 5.87453800  | -0.02661800 |
| H                       | 1.88493000  | -1.64944900 | 3.25492000  | C           | 0.98740000  | 2.35263400  | 1.31456500  |
| C                       | 4.55970200  | -2.38744600 | 0.27439200  | C           | 0.38802100  | 4.57688500  | 0.51140500  |
| H                       | 3.86129700  | -2.86181000 | -0.42391900 | H           | -0.37808000 | 5.30795400  | 0.26772700  |
| H                       | 5.28787900  | -1.81686400 | -0.31402500 | C           | 0.01356400  | 3.32330300  | 0.99150800  |
| H                       | 5.10267900  | -3.18024000 | 0.80549100  | H           | -1.04091000 | 3.09398000  | 1.11210400  |
| Br                      | 2.50824100  | 2.27558000  | -1.58803100 | H           | 3.76860900  | 4.18951800  | 0.54378500  |
|                         |             |             |             | C           | 0.63370500  | 1.01370200  | 1.82866500  |
| <b>TS<sub>3-4</sub></b> |             |             |             | C           | -0.62481000 | 0.87671200  | 2.68938200  |
| C                       | -2.99155900 | 3.87100300  | -0.95228700 | H           | -0.51023800 | 0.05364300  | 3.40409300  |
| C                       | -2.38675300 | 2.70679100  | -1.42220400 | H           | 1.48917800  | 0.46663000  | 2.22037100  |
| C                       | -2.25470100 | 4.78882200  | -0.20036400 | H           | -0.84951700 | 1.78330100  | 3.26781000  |
| H                       | -2.96420800 | 1.99668900  | -2.00908700 | C           | -1.72218600 | 0.56392000  | 1.75703400  |
| H                       | -2.72547900 | 5.69545200  | 0.16969000  | C           | -2.59895600 | 0.32254100  | 0.93142200  |
| C                       | -1.02916400 | 2.44219600  | -1.16124200 | Br          | -0.97778200 | -0.77540200 | -2.29135100 |
| C                       | -0.90874600 | 4.53178100  | 0.07902600  | Si          | -4.20838100 | 0.05450700  | 0.01498300  |
| H                       | -0.33185300 | 5.23628300  | 0.67199500  | C           | -5.54434300 | 0.49262800  | 1.28236600  |
| C                       | -0.29998600 | 3.37212400  | -0.39354600 | H           | -6.54179700 | 0.36809600  | 0.84017200  |
| H                       | 0.74124500  | 3.17851800  | -0.15121900 | H           | -5.49183900 | -0.15331500 | 2.16725700  |
| H                       | -4.03862600 | 4.06097500  | -1.17248400 | H           | -5.45978500 | 1.53271800  | 1.62007200  |
| C                       | -0.42067300 | 1.22273700  | -1.72095600 | C           | -4.34477500 | -1.75395500 | -0.48241000 |
| C                       | 0.96062100  | 1.09131100  | -1.99161400 | H           | -5.29955500 | -1.93964400 | -0.99192900 |
| H                       | 1.26893600  | 0.37139300  | -2.74081800 | H           | -3.53295100 | -2.02683200 | -1.16469400 |
| H                       | -1.08868500 | 0.57759800  | -2.28701200 | H           | -4.29984400 | -2.41509500 | 0.39202100  |
| H                       | 1.60111400  | 1.95697300  | -1.88538300 | C           | -4.28366900 | 1.22677500  | -1.45349400 |
| C                       | 1.98279200  | 0.17201800  | -0.46238900 | H           | -3.47262600 | 1.01313300  | -2.15757400 |
| C                       | 3.21332300  | 0.21101500  | -0.38678400 | H           | -5.23828700 | 1.11486600  | -1.98432900 |
| Br                      | 0.72675800  | -1.83447100 | 1.83645000  | H           | -4.19964700 | 2.27378400  | -1.13647100 |
| Si                      | 5.04886500  | 0.20972900  | -0.21702700 | Pd          | -0.02479800 | 0.00340200  | 0.08378600  |
| C                       | 5.78923100  | 1.13060900  | -1.69615400 | C           | 1.91493500  | -0.56347100 | -0.52393300 |
| H                       | 6.88519300  | 1.14886900  | -1.63005400 | C           | 1.66062400  | -1.48951300 | 0.28412000  |
| H                       | 5.52395000  | 0.64957900  | -2.64578200 | Si          | 1.57484000  | -3.06311100 | 1.28708600  |
| H                       | 5.44415300  | 2.17110400  | -1.74017300 | C           | 3.01562000  | -4.12250400 | 0.68318300  |
| C                       | 5.65488600  | -1.57812800 | -0.19688500 | H           | 3.03810800  | -5.07808600 | 1.22354900  |
| H                       | 6.74658200  | -1.62130700 | -0.08669400 | H           | 2.92465900  | -4.34555300 | -0.38637000 |

|    |             |             |             |
|----|-------------|-------------|-------------|
| H  | 3.98012400  | -3.62585500 | 0.84314000  |
| C  | 1.77770100  | -2.63172100 | 3.11324200  |
| H  | 0.94562400  | -2.02184500 | 3.48501200  |
| H  | 1.80104200  | -3.55023200 | 3.71442000  |
| H  | 2.71129000  | -2.08912900 | 3.30480800  |
| C  | -0.08202800 | -3.89178900 | 0.96172200  |
| H  | -0.91489900 | -3.28174800 | 1.33067100  |
| H  | -0.24088200 | -4.04958000 | -0.11119200 |
| H  | -0.13076300 | -4.86830000 | 1.46121300  |
| Br | 3.03130700  | 0.24367800  | -1.79164000 |

**INT5**

|    |             |             |             |
|----|-------------|-------------|-------------|
| C  | 3.86583100  | -1.41703300 | -2.68700600 |
| C  | 2.63148700  | -0.89844200 | -2.30204600 |
| C  | 4.34245700  | -2.59211200 | -2.10095900 |
| H  | 2.25940100  | 0.01250400  | -2.76439200 |
| H  | 5.30756700  | -2.99551000 | -2.39530400 |
| C  | 1.84226600  | -1.55098700 | -1.33393300 |
| C  | 3.57614600  | -3.24533800 | -1.12991100 |
| H  | 3.94698000  | -4.15457500 | -0.66496800 |
| C  | 2.33979400  | -2.73277300 | -0.74796100 |
| H  | 1.76647500  | -3.23024700 | 0.02758800  |
| H  | 4.45488100  | -0.90516100 | -3.44313300 |
| C  | 0.49914100  | -1.00708200 | -1.01841100 |
| C  | -0.64580900 | -2.02806800 | -0.99119500 |
| H  | -0.59911300 | -2.54463300 | -1.96558500 |
| H  | 0.25043500  | -0.16194400 | -1.66217600 |
| H  | -0.46600900 | -2.79165400 | -0.22966400 |
| C  | -1.99797600 | -1.49280300 | -0.83368100 |
| C  | -3.16007700 | -1.13197500 | -0.74647100 |
| Br | 0.33185200  | -1.98361800 | 2.46063800  |
| Si | -4.96991200 | -0.77636900 | -0.65686400 |
| C  | -5.59933800 | -0.44579800 | -2.40848300 |
| H  | -6.67894200 | -0.24570200 | -2.40262000 |
| H  | -5.10353200 | 0.42298400  | -2.85884600 |
| H  | -5.42492300 | -1.30599500 | -3.06634900 |
| C  | -5.27981400 | 0.73163300  | 0.43625500  |
| H  | -6.35652700 | 0.93514900  | 0.50840800  |
| H  | -4.90368600 | 0.57626200  | 1.45434000  |
| H  | -4.80010100 | 1.63090400  | 0.03226700  |
| C  | -5.82425900 | -2.29424300 | 0.07249100  |
| H  | -5.45692200 | -2.51087700 | 1.08288000  |
| H  | -6.90912500 | -2.13766100 | 0.13738400  |
| H  | -5.65228800 | -3.18639100 | -0.54180700 |
| Pd | 0.65606100  | -0.03024300 | 0.83518500  |
| C  | 1.70264800  | 1.65357500  | 0.15292400  |
| C  | 0.52203100  | 2.06795500  | 0.04994800  |
| Si | -1.03750600 | 3.09314200  | -0.11171500 |
| C  | -0.45995500 | 4.88830400  | -0.20221400 |
| H  | 0.09591100  | 5.17873600  | 0.69721000  |
| H  | 0.18724100  | 5.06302800  | -1.06997900 |
| H  | -1.32416000 | 5.56000000  | -0.29060700 |
| C  | -2.07672000 | 2.78273500  | 1.42520600  |
| H  | -2.36342700 | 1.72851600  | 1.50767700  |
| H  | -1.52288800 | 3.05145100  | 2.33329400  |
| H  | -2.99462900 | 3.38386900  | 1.40672000  |
| C  | -1.91543400 | 2.58445200  | -1.69813200 |
| H  | -1.28104800 | 2.74909800  | -2.57790500 |
| H  | -2.20505700 | 1.52792900  | -1.67875000 |
| H  | -2.82718800 | 3.18099900  | -1.83439100 |
| Br | 3.56389600  | 1.89485400  | 0.08169900  |

**TS<sub>5-6</sub>**

|   |            |            |            |
|---|------------|------------|------------|
| C | 3.07426200 | 3.43531300 | 1.88684800 |
|---|------------|------------|------------|

|    |             |             |             |
|----|-------------|-------------|-------------|
| C  | 1.90648400  | 2.68694200  | 1.75623200  |
| C  | 3.63739200  | 4.05517700  | 0.76904700  |
| H  | 1.47127200  | 2.20563000  | 2.62846800  |
| H  | 4.54931900  | 4.63736300  | 0.86816300  |
| C  | 1.27224200  | 2.54928100  | 0.50672600  |
| C  | 3.02299200  | 3.92073500  | -0.48006400 |
| H  | 3.45839300  | 4.39566900  | -1.35489700 |
| C  | 1.85408600  | 3.17652400  | -0.61343000 |
| H  | 1.39958600  | 3.07473400  | -1.59473800 |
| H  | 3.54465900  | 3.53439200  | 2.86130200  |
| C  | 0.03349700  | 1.75835700  | 0.43199500  |
| C  | -0.91415200 | 1.85329200  | -0.62681600 |
| H  | -0.74942300 | 2.60902200  | -1.39371400 |
| H  | -0.33432100 | 1.36684100  | 1.37707300  |
| H  | -0.40805500 | 0.76374100  | -1.82809700 |
| C  | -2.28338900 | 1.48542100  | -0.42596300 |
| C  | -3.46599300 | 1.22941300  | -0.26359100 |
| Br | 0.72210100  | -1.78024200 | -2.66792700 |
| Si | -5.26254900 | 0.83900700  | -0.04307700 |
| C  | -5.68537500 | 1.02338500  | 1.78778100  |
| H  | -6.74569000 | 0.79924100  | 1.96324100  |
| H  | -5.09469900 | 0.33980300  | 2.40971700  |
| H  | -5.49883700 | 2.04407700  | 2.14333900  |
| C  | -5.55617300 | -0.93146300 | -0.62465900 |
| H  | -6.61538200 | -1.20157100 | -0.52144200 |
| H  | -5.28076800 | -1.05784500 | -1.67852800 |
| H  | -4.97057400 | -1.65103300 | -0.03989800 |
| C  | -6.25685700 | 2.06072700  | -1.08203700 |
| H  | -6.00117100 | 1.98418800  | -2.14572000 |
| H  | -7.33259800 | 1.86466400  | -0.98365300 |
| H  | -6.07772800 | 3.09633200  | -0.76856300 |
| Pd | 0.42436300  | -0.06955200 | -0.75674100 |
| C  | 2.04280500  | -1.04546100 | 0.57173600  |
| C  | 1.01204400  | -1.45513600 | 1.11831400  |
| Si | -0.36733300 | -2.30450200 | 2.05407300  |
| C  | 0.49906900  | -3.45378600 | 3.27499600  |
| H  | 1.12138900  | -4.19216400 | 2.75571400  |
| H  | 1.14255700  | -2.89886500 | 3.96820600  |
| H  | -0.24100900 | -4.00217900 | 3.87252600  |
| C  | -1.42299300 | -3.26188300 | 0.82822800  |
| H  | -1.91390100 | -2.59261800 | 0.11284400  |
| H  | -0.81920500 | -3.97141400 | 0.25121600  |
| H  | -2.20197100 | -3.82848200 | 1.35555100  |
| C  | -1.38039800 | -1.00043400 | 2.96562400  |
| H  | -0.75701300 | -0.37714200 | 3.61823700  |
| H  | -1.91864500 | -0.34406700 | 2.27191100  |
| H  | -2.13029100 | -1.49065600 | 3.60086400  |
| Br | 3.83117100  | -0.78860900 | 0.15996100  |

**INT6**

|   |             |            |             |
|---|-------------|------------|-------------|
| C | 3.65085800  | 3.34710300 | 1.71976900  |
| C | 2.44839200  | 2.64526600 | 1.65213300  |
| C | 4.17455300  | 3.94662500 | 0.57342700  |
| H | 2.04210600  | 2.18236100 | 2.54798800  |
| H | 5.11361500  | 4.49099300 | 0.62098100  |
| C | 1.74134600  | 2.53537700 | 0.44058100  |
| C | 3.48585700  | 3.84015500 | -0.64010600 |
| H | 3.89115300  | 4.29924800 | -1.53752600 |
| C | 2.28363200  | 3.14361400 | -0.70907200 |
| H | 1.77354500  | 3.05932300 | -1.66385900 |
| H | 4.17766300  | 3.42385600 | 2.66695000  |
| C | 0.45420700  | 1.82111400 | 0.45341300  |
| C | -0.54367500 | 1.92446800 | -0.51587500 |
| H | -0.35995000 | 2.54516300 | -1.38964400 |

|             |             |             |             |              |             |             |             |
|-------------|-------------|-------------|-------------|--------------|-------------|-------------|-------------|
| H           | 0.17272600  | 1.38888300  | 1.41081500  | H            | 5.39403800  | -1.47344700 | 1.42929700  |
| H           | 0.64885600  | 0.69336400  | -2.25196900 | C            | 6.31935300  | 2.19159400  | -0.05315800 |
| C           | -1.91497400 | 1.60899700  | -0.29854000 | H            | 6.18028200  | 2.74138300  | 0.88561500  |
| C           | -3.12166800 | 1.45469700  | -0.16557900 | H            | 7.39611600  | 2.01947400  | -0.18154500 |
| Br          | 1.23967600  | -1.89357600 | -2.54391400 | H            | 5.98700200  | 2.84028600  | -0.87268700 |
| Si          | -4.96601400 | 1.38787300  | -0.01308000 | Pd           | -0.08793700 | -0.17933400 | -0.75671900 |
| C           | -5.44739900 | 2.17300500  | 1.63573600  | C            | -0.81651500 | -1.23322700 | 1.43469300  |
| H           | -6.53845300 | 2.17232300  | 1.75858100  | C            | -1.90095600 | -0.98839400 | 0.91202200  |
| H           | -5.01779100 | 1.62730400  | 2.48461000  | Si           | -3.69691900 | -0.95902700 | 0.36317800  |
| H           | -5.10632200 | 3.21331100  | 1.70056200  | C            | -4.16047500 | -2.75927200 | 0.05899200  |
| C           | -5.54488300 | -0.40682000 | -0.08210000 | H            | -3.54307000 | -3.19057200 | -0.73676200 |
| H           | -6.63939400 | -0.45243000 | -0.00528100 | H            | -4.02639500 | -3.36956000 | 0.96008500  |
| H           | -5.25857600 | -0.89025800 | -1.02332000 | H            | -5.21232400 | -2.83734700 | -0.24643200 |
| H           | -5.13041100 | -0.99893000 | 0.74201000  | C            | -3.91935300 | 0.08056600  | -1.18534100 |
| C           | -5.68764600 | 2.36868200  | -1.45537400 | H            | -3.62064400 | 1.12309100  | -1.03158800 |
| H           | -5.39363300 | 1.93677800  | -2.41964400 | H            | -3.33638100 | -0.32455900 | -2.01934400 |
| H           | -6.78470100 | 2.37067000  | -1.41187200 | H            | -4.97756600 | 0.07662600  | -1.47977200 |
| H           | -5.35189100 | 3.41259000  | -1.44098200 | C            | -4.67140200 | -0.24484200 | 1.81397800  |
| Pd          | 0.60542800  | -0.04556100 | -0.91080800 | H            | -4.50845300 | -0.81903500 | 2.73394400  |
| C           | 1.48706900  | -1.35021300 | 1.03147700  | H            | -4.39705600 | 0.79776300  | 2.01132100  |
| C           | 0.29746200  | -1.65520800 | 1.08146900  | H            | -5.74680400 | -0.26911400 | 1.59321300  |
| Si          | -1.38091300 | -2.43584600 | 1.35986700  | Br           | 0.59447400  | -1.84278700 | 2.46460400  |
| C           | -1.01308700 | -4.14696400 | 2.06545100  |              |             |             |             |
| H           | -0.43594800 | -4.75315200 | 1.35730000  | <b>TS7-8</b> |             |             |             |
| H           | -0.44407700 | -4.08792700 | 3.00091600  | C            | -3.78556200 | 4.22863700  | -0.86120700 |
| H           | -1.94941700 | -4.68037100 | 2.27671900  | C            | -2.53561700 | 3.64460200  | -1.05720000 |
| C           | -2.29249900 | -2.55911300 | -0.27820500 | C            | -4.50748400 | 3.95993900  | 0.30340500  |
| H           | -2.50186100 | -1.57096100 | -0.70117700 | H            | -1.97880600 | 3.85085900  | -1.96812200 |
| H           | -1.70157300 | -3.11706500 | -1.01309700 | H            | -5.48279300 | 4.41271400  | 0.45849300  |
| H           | -3.24786600 | -3.08285000 | -0.14346400 | C            | -1.98503300 | 2.78199600  | -0.09469200 |
| C           | -2.29627200 | -1.37407300 | 2.62134700  | C            | -3.96837000 | 3.10639100  | 1.27021200  |
| H           | -1.73626900 | -1.29946700 | 3.56168800  | H            | -4.52183800 | 2.89656300  | 2.18130300  |
| H           | -2.46477400 | -0.35874000 | 2.24519000  | C            | -2.71875400 | 2.52233400  | 1.07471400  |
| H           | -3.27430600 | -1.81459300 | 2.85527200  | H            | -2.31577700 | 1.86638000  | 1.83981600  |
| Br          | 3.31910100  | -1.21620300 | 1.23061900  | H            | -4.19493200 | 4.89189800  | -1.61791600 |
|             |             |             |             | C            | -0.63477900 | 2.22452300  | -0.34996900 |
| <b>INT7</b> |             |             |             | C            | 0.15184000  | 1.50579500  | 0.59205700  |
| C           | -2.86560400 | 4.21821800  | -0.89677400 | H            | -0.26999700 | 1.28375600  | 1.57034400  |
| C           | -1.68693100 | 3.51310100  | -1.13218400 | H            | -0.08029200 | 2.73378900  | -1.13531800 |
| C           | -3.44387500 | 4.20776900  | 0.37460400  | H            | -0.99679600 | 1.06776700  | -1.60715000 |
| H           | -1.23597700 | 3.52535300  | -2.12129500 | C            | 1.57442500  | 1.52225600  | 0.51608300  |
| H           | -4.35862200 | 4.76254100  | 0.56386000  | C            | 2.79635800  | 1.57158100  | 0.48243100  |
| C           | -1.06458700 | 2.77923700  | -0.10427300 | Br           | -1.55468300 | -1.56651800 | -2.59649200 |
| C           | -2.83498000 | 3.48552200  | 1.40676400  | Si           | 4.63600400  | 1.74044000  | 0.43476900  |
| H           | -3.27276000 | 3.48457000  | 2.40127600  | C            | 5.06491600  | 3.09620200  | -0.80734700 |
| C           | -1.66005700 | 2.77519200  | 1.17215600  | H            | 6.15208300  | 3.23754400  | -0.86660300 |
| H           | -1.19904800 | 2.22808400  | 1.98860000  | H            | 4.70753400  | 2.84510100  | -1.81348000 |
| H           | -3.32912400 | 4.77852000  | -1.70388800 | H            | 4.61948200  | 4.05781800  | -0.52493400 |
| C           | 0.20871000  | 2.10938100  | -0.40643500 | C            | 5.40426700  | 0.09985500  | -0.09510600 |
| C           | 0.99886600  | 1.39001000  | 0.49199300  | H            | 6.49812700  | 0.18725800  | -0.13611200 |
| H           | 0.63743800  | 1.24856900  | 1.50858300  | H            | 5.16173700  | -0.70651000 | 0.60705600  |
| H           | 0.67075100  | 2.41150900  | -1.34202000 | H            | 5.05817800  | -0.20424000 | -1.09007000 |
| H           | 0.73686800  | 0.17310500  | -1.99393600 | C            | 5.22453800  | 2.21198000  | 2.16623500  |
| C           | 2.38374600  | 1.12805700  | 0.29100700  | H            | 4.96162600  | 1.44350300  | 2.90334600  |
| C           | 3.58130400  | 0.91142000  | 0.17327100  | H            | 6.31591400  | 2.33031600  | 2.18431100  |
| Br          | -0.58484000 | -2.14809100 | -2.29271700 | H            | 4.78196700  | 3.15883400  | 2.49847600  |
| Si          | 5.38135500  | 0.55225900  | -0.04438800 | Pd           | -0.57608600 | -0.14401600 | -0.68039600 |
| C           | 5.60591500  | -0.35293300 | -1.68445300 | C            | 0.52806100  | -1.93784800 | 0.26831600  |
| H           | 6.66326300  | -0.59646900 | -1.85274900 | C            | -0.44454200 | -1.85048600 | 1.02569500  |
| H           | 5.03889000  | -1.29142100 | -1.70368200 | Si           | -1.82360800 | -2.03448500 | 2.27401300  |
| H           | 5.26560000  | 0.25755500  | -2.52963200 | C            | -1.69285900 | -3.80867900 | 2.90099100  |
| C           | 5.94520300  | -0.52573000 | 1.39930800  | H            | -1.83548700 | -4.52952000 | 2.08736600  |
| H           | 7.01308600  | -0.76471700 | 1.31055200  | H            | -0.71585900 | -4.00560900 | 3.35818900  |
| H           | 5.79651200  | -0.02137100 | 2.36190300  | H            | -2.46249100 | -4.00325300 | 3.65946700  |

|    |             |             |             |
|----|-------------|-------------|-------------|
| C  | -3.47590100 | -1.72389300 | 1.43183000  |
| H  | -3.57742700 | -0.68775700 | 1.08916000  |
| H  | -3.60036800 | -2.37185100 | 0.55688100  |
| H  | -4.30042300 | -1.93049300 | 2.12708400  |
| C  | -1.50873800 | -0.81051200 | 3.67637400  |
| H  | -0.51783100 | -0.95741000 | 4.12265200  |
| H  | -1.57483900 | 0.23258600  | 3.34400900  |
| H  | -2.25394900 | -0.94685400 | 4.47113000  |
| Br | 2.08694300  | -2.53290700 | -0.53439600 |

**INT8**

|    |             |             |             |
|----|-------------|-------------|-------------|
| C  | -3.99312600 | 2.93965400  | 0.26374500  |
| C  | -2.61247800 | 2.80130000  | 0.09519400  |
| C  | -4.57891700 | 2.69050400  | 1.50677200  |
| H  | -2.15984700 | 3.00051500  | -0.87222300 |
| H  | -5.65149300 | 2.80547300  | 1.63949100  |
| C  | -1.79673400 | 2.41188700  | 1.16673900  |
| C  | -3.77529900 | 2.30493200  | 2.58302400  |
| H  | -4.21957800 | 2.12335100  | 3.55843200  |
| C  | -2.39571400 | 2.16937400  | 2.41225500  |
| H  | -1.77437100 | 1.89158900  | 3.26165900  |
| H  | -4.60821400 | 3.25089400  | -0.57671700 |
| C  | -0.29431400 | 2.30498300  | 1.00596000  |
| C  | 0.27257600  | 0.87882500  | 0.90944500  |
| H  | -0.17853100 | 0.20859300  | 1.64612900  |
| H  | 0.18325500  | 2.73303500  | 1.90193700  |
| H  | 0.05137300  | 2.89226600  | 0.15408700  |
| C  | 1.69764300  | 0.79378800  | 0.89103100  |
| C  | 2.92134700  | 0.74339500  | 0.89987600  |
| Br | 0.17785000  | 1.73965300  | -2.58037400 |
| Si | 4.77050900  | 0.68402500  | 0.87675400  |
| C  | 5.34218300  | -0.57870000 | 2.15913000  |
| H  | 6.43777300  | -0.64873800 | 2.17139100  |
| H  | 5.01620800  | -0.30276500 | 3.16941400  |
| H  | 4.94760900  | -1.57884200 | 1.94276100  |
| C  | 5.41812000  | 2.40439400  | 1.30477700  |
| H  | 6.51595100  | 2.41736400  | 1.29521700  |
| H  | 5.06951500  | 3.15285000  | 0.58314400  |
| H  | 5.09093900  | 2.72289800  | 2.30199700  |
| C  | 5.30831000  | 0.17428900  | -0.85827900 |
| H  | 4.95041700  | 0.88706100  | -1.61062400 |
| H  | 6.40331900  | 0.13255800  | -0.92777400 |
| H  | 4.91721600  | -0.81455900 | -1.12593800 |
| Pd | -0.25615600 | -0.10765200 | -0.86632900 |
| C  | -0.06680700 | -2.03824800 | -0.06923200 |
| C  | -1.30925800 | -1.87464600 | 0.01770600  |
| Si | -3.15694800 | -2.15381200 | 0.19914600  |
| C  | -3.40915200 | -3.98456200 | -0.18760700 |
| H  | -3.09806400 | -4.22605800 | -1.21090600 |
| H  | -2.84274900 | -4.62655700 | 0.49742800  |
| H  | -4.47057400 | -4.24866000 | -0.09088400 |
| C  | -4.06246300 | -1.06434200 | -1.03585100 |
| H  | -3.91204300 | -0.00009500 | -0.82313900 |
| H  | -3.72486100 | -1.25509300 | -2.06178600 |
| H  | -5.14144800 | -1.26417700 | -0.99780100 |
| C  | -3.63333800 | -1.76557300 | 1.97893200  |
| H  | -3.06719700 | -2.37957100 | 2.68982300  |
| H  | -3.46124000 | -0.71155800 | 2.22364600  |
| H  | -4.70000700 | -1.97286100 | 2.13651000  |
| Br | 1.49142200  | -3.06900800 | 0.11327700  |

**INT9**

|   |            |             |             |
|---|------------|-------------|-------------|
| C | 6.39235500 | -1.35455700 | -0.82940000 |
| C | 5.06982700 | -1.56873100 | -0.43667300 |

|    |             |             |             |
|----|-------------|-------------|-------------|
| C  | 7.01179700  | -0.13039800 | -0.56782300 |
| H  | 4.59497900  | -2.52709300 | -0.63570700 |
| H  | 8.04252100  | 0.03617200  | -0.86955600 |
| C  | 4.34650900  | -0.56456100 | 0.22186900  |
| C  | 6.30072500  | 0.87688100  | 0.08884500  |
| H  | 6.77739100  | 1.83034400  | 0.30200000  |
| C  | 4.97783400  | 0.66054300  | 0.47832000  |
| H  | 4.43118100  | 1.44758100  | 0.99348600  |
| H  | 6.93989600  | -2.14624700 | -1.33433900 |
| C  | 2.89740000  | -0.79261400 | 0.62387300  |
| C  | 1.94044500  | -0.37860800 | -0.48772700 |
| H  | 2.06987600  | -0.91801000 | -1.42656100 |
| H  | 2.66232300  | -0.23702000 | 1.53725200  |
| H  | 2.72496500  | -1.85394500 | 0.82633600  |
| C  | 1.42816000  | 0.91741700  | -0.57867500 |
| C  | 0.53718700  | 1.79472400  | -0.49494100 |
| Br | -0.15097700 | -2.99452000 | 0.28192000  |
| Si | -0.22953600 | 3.49799300  | -0.54973300 |
| C  | 0.82659800  | 4.52881400  | -1.72677100 |
| H  | 0.43448200  | 5.55209600  | -1.79604000 |
| H  | 1.86643000  | 4.59284700  | -1.38472400 |
| H  | 0.83194900  | 4.10443100  | -2.73784800 |
| C  | -0.18684800 | 4.21240000  | 1.19446000  |
| H  | -0.61473100 | 5.22343700  | 1.20385300  |
| H  | -0.76289300 | 3.60175700  | 1.89923800  |
| H  | 0.83979600  | 4.28221400  | 1.57368500  |
| C  | -1.99640200 | 3.35336700  | -1.18502800 |
| H  | -2.61356100 | 2.73828500  | -0.52129200 |
| H  | -2.45891000 | 4.34701200  | -1.24836700 |
| H  | -2.02481900 | 2.91095200  | -2.18793600 |
| Pd | -0.20222100 | -0.43134300 | -0.00451700 |
| C  | -2.12377300 | -0.03205400 | 1.05297300  |
| C  | -2.56111400 | -0.33501700 | -0.06714400 |
| Si | -3.46614500 | -0.85507800 | -1.62281200 |
| C  | -4.06344600 | -2.61815400 | -1.34832100 |
| H  | -3.21886200 | -3.28564300 | -1.14428400 |
| H  | -4.75438900 | -2.68058000 | -0.49908200 |
| H  | -4.58891300 | -2.99047000 | -2.23765100 |
| C  | -2.29584300 | -0.74071500 | -3.09364700 |
| H  | -1.87112700 | 0.26417600  | -3.20253300 |
| H  | -1.46662100 | -1.45043900 | -2.99599300 |
| H  | -2.83252400 | -0.97853100 | -4.02173100 |
| C  | -4.91453200 | 0.34188000  | -1.81242500 |
| H  | -5.57215300 | 0.32025900  | -0.93498400 |
| H  | -4.57547400 | 1.37499300  | -1.95373800 |
| H  | -5.51961700 | 0.06774500  | -2.68677800 |
| Br | -2.12961800 | 0.42854600  | 2.85854000  |

**TS<sub>9-10</sub>**

|   |            |             |             |
|---|------------|-------------|-------------|
| C | 6.20441400 | -1.29687400 | 1.20059400  |
| C | 4.87634100 | -0.88328700 | 1.32086400  |
| C | 7.12992400 | -0.49932300 | 0.52461200  |
| H | 4.15767700 | -1.51213600 | 1.83882000  |
| H | 8.16360600 | -0.82168700 | 0.43137700  |
| C | 4.45671800 | 0.33310400  | 0.76957600  |
| C | 6.72175800 | 0.71662600  | -0.02862700 |
| H | 7.43694000 | 1.34639600  | -0.55137000 |
| C | 5.39484600 | 1.13004500  | 0.09711600  |
| H | 5.08697000 | 2.08550000  | -0.32368400 |
| H | 6.51410700 | -2.24448000 | 1.63321700  |
| C | 3.02322400 | 0.79859200  | 0.90328000  |
| C | 2.23732300 | 0.79152100  | -0.39425200 |
| H | 2.78692200 | 0.60159100  | -1.31089100 |
| H | 3.00441000 | 1.84025200  | 1.26050700  |

|              |             |             |             |              |             |             |             |
|--------------|-------------|-------------|-------------|--------------|-------------|-------------|-------------|
| H            | 2.48352100  | 0.21761200  | 1.65680600  | C            | -1.99640200 | 3.35336700  | -1.18502800 |
| C            | 1.03800300  | 1.46704600  | -0.50979200 | H            | -2.61356100 | 2.73828500  | -0.52129200 |
| C            | -0.10886200 | 1.97903900  | -0.63305400 | H            | -2.45891000 | 4.34701200  | -1.24836700 |
| Br           | 1.74102200  | -1.84800000 | -0.75030300 | H            | -2.02481900 | 2.91095200  | -2.18793600 |
| Si           | -1.25788600 | 3.39537600  | -1.08057500 | Pd           | -0.20222100 | -0.43134300 | -0.00451700 |
| C            | -0.28437900 | 4.51588300  | -2.24879100 | C            | -2.12377300 | -0.03205400 | 1.05297300  |
| H            | -0.89669700 | 5.37331200  | -2.55770800 | C            | -2.56111400 | -0.83501700 | -0.06714400 |
| H            | 0.61999600  | 4.90979000  | -1.76943900 | Si           | -3.46614500 | -0.85507800 | -1.62281200 |
| H            | 0.02133100  | 3.98106700  | -3.15600700 | C            | -4.06344600 | -2.61815400 | -1.34832100 |
| C            | -1.71866300 | 4.31644500  | 0.49761800  | H            | -3.21886200 | -3.28564300 | -1.14428400 |
| H            | -2.38053400 | 5.16146700  | 0.26666900  | H            | -4.75438900 | -2.68058000 | -0.49908200 |
| H            | -2.24137600 | 3.66751900  | 1.20880100  | H            | -4.58891300 | -2.99047000 | -2.23765100 |
| H            | -0.82982900 | 4.71805700  | 0.99933500  | C            | -2.29584300 | -0.74071500 | -3.09364700 |
| C            | -2.76565700 | 2.67106700  | -1.94371700 | H            | -1.87112700 | 0.26417600  | -3.20253300 |
| H            | -3.31260100 | 1.98176600  | -1.29078800 | H            | -1.46662100 | -1.45043900 | -2.99599300 |
| H            | -3.45567700 | 3.46947800  | -2.24616100 | H            | -2.83252400 | -0.97853100 | -4.02173100 |
| H            | -2.47832900 | 2.11789600  | -2.84608000 | C            | -4.91453200 | 0.34188000  | -1.81242500 |
| Pd           | -0.52716000 | -0.06525700 | -0.00936400 | H            | -5.57215300 | 0.32025900  | -0.93498400 |
| C            | -2.33273100 | -0.25010300 | 0.96132000  | H            | -4.57547400 | 1.37499300  | -1.95373800 |
| C            | -2.35295600 | -1.27053700 | 0.21674300  | H            | -5.51961700 | 0.06774500  | -2.68677800 |
| Si           | -2.79886500 | -2.84108200 | -0.68472400 | Br           | -2.12961800 | 0.42854600  | 2.85854000  |
| C            | -1.72509300 | -4.23249000 | -0.00720800 |              |             |             |             |
| H            | -0.66153700 | -4.01320200 | -0.15743600 | <b>3b'</b>   |             |             |             |
| H            | -1.89040200 | -4.38007700 | 1.06706900  | C            | -2.26366300 | -3.01562600 | 0.71741500  |
| H            | -1.95120800 | -5.17985700 | -0.51412600 | C            | -1.82332200 | -1.72506700 | 1.01655400  |
| C            | -2.50263200 | -2.57778900 | -2.52747600 | C            | -3.24995900 | -3.21347200 | -0.25139600 |
| H            | -3.08600800 | -1.73194300 | -2.91137400 | H            | -1.05662200 | -1.57624400 | 1.77263100  |
| H            | -1.44437100 | -2.37924100 | -2.73237000 | H            | -3.59452300 | -4.21785600 | -0.48294000 |
| H            | -2.79338600 | -3.47018900 | -3.09713200 | C            | -2.36414200 | -0.61377300 | 0.35544100  |
| C            | -4.63017000 | -3.16541100 | -0.34222700 | C            | -3.79585900 | -2.11333200 | -0.91689500 |
| H            | -4.82481500 | -3.28370200 | 0.73060000  | H            | -4.56862200 | -2.25778800 | -1.66746800 |
| H            | -5.26077000 | -2.34635200 | -0.70895000 | C            | -3.35538400 | -0.82411600 | -0.61412300 |
| H            | -4.95654300 | -4.08670000 | -0.84298100 | H            | -3.79204700 | 0.02937600  | -1.12885300 |
| Br           | -3.24776400 | 0.76109200  | 2.29112400  | H            | -1.83830100 | -3.86609800 | 1.24391300  |
|              |             |             |             | C            | -1.88136400 | 0.79104700  | 0.66580500  |
|              |             |             |             | C            | -0.79428500 | 1.24135500  | -0.32662800 |
| <b>INT10</b> |             |             |             | H            | -1.17622000 | 1.27496500  | -1.34808100 |
| C            | 6.39235500  | -1.35455700 | -0.82940000 | H            | -1.47830000 | 0.84723800  | 1.68101100  |
| C            | 5.06982700  | -1.56873100 | -0.43667300 | H            | -2.71347300 | 1.49797800  | 0.59703200  |
| C            | 7.01179700  | -0.13039800 | -0.56782300 | C            | 0.45314700  | 0.52822100  | -0.24839000 |
| H            | 4.59497900  | -2.52709300 | -0.63570700 | C            | 1.49045400  | -0.10996000 | -0.18063600 |
| H            | 8.04252100  | 0.03617200  | -0.86955600 | Br           | -0.42141800 | 3.29015000  | 0.01741400  |
| C            | 4.34650900  | -0.56456100 | 0.22186900  | Si           | 3.07051600  | -1.06678200 | -0.08438600 |
| C            | 6.30072500  | 0.87688100  | 0.08884500  | C            | 2.92479100  | -2.55788500 | -1.23241500 |
| H            | 6.77739100  | 1.83034400  | 0.30200000  | H            | 3.84087300  | -3.16220900 | -1.19970700 |
| C            | 4.97783400  | 0.66054300  | 0.47832000  | H            | 2.08759400  | -3.20587500 | -0.94627900 |
| H            | 4.43118100  | 1.44758100  | 0.99348600  | H            | 2.76670300  | -2.24923100 | -2.27283500 |
| H            | 6.93989600  | -2.14624700 | -1.33433900 | C            | 3.32076000  | -1.62283000 | 1.70207100  |
| C            | 2.89740000  | -0.79261400 | 0.62387300  | H            | 4.25643900  | -2.18800000 | 1.80454900  |
| C            | 1.94044500  | -0.37860800 | -0.48772700 | H            | 3.37362000  | -0.76635600 | 2.38512000  |
| H            | 2.06987600  | -0.91801000 | -1.42656100 | H            | 2.50311300  | -2.27059100 | 2.04109000  |
| H            | 2.66232300  | -0.23702000 | 1.53725200  | C            | 4.47666800  | 0.06643000  | -0.63170200 |
| H            | 2.72496500  | -1.85394500 | 0.82633600  | H            | 4.55261600  | 0.95126300  | 0.01167400  |
| C            | 1.42816000  | 0.91741700  | -0.57867500 | H            | 5.43824700  | -0.46167800 | -0.58781800 |
| C            | 0.53718700  | 1.79472400  | -0.49494100 | H            | 4.33426400  | 0.41485800  | -1.66171800 |
| Br           | -0.15097700 | -2.99452000 | 0.28192000  |              |             |             |             |
| Si           | -0.22953600 | 3.49799300  | -0.54973300 | <b>INT11</b> |             |             |             |
| C            | 0.82659800  | 4.52881400  | -1.72677100 | C            | -1.99226300 | 3.95627600  | -0.35313300 |
| H            | 0.43448200  | 5.55209600  | -1.79604000 | C            | -0.83006700 | 3.24514800  | -0.59846900 |
| H            | 1.86643000  | 4.59284700  | -1.38472400 | C            | -2.63610900 | 3.85902300  | 0.89472800  |
| H            | 0.83194900  | 4.10443100  | -2.73784800 | H            | -0.33186500 | 3.31502100  | -1.56156400 |
| C            | -0.18684800 | 4.21240000  | 1.19446000  | H            | -3.54652300 | 4.42283800  | 1.07797500  |
| H            | -0.61473100 | 5.22343700  | 1.20385300  | C            | -0.24605000 | 2.43310100  | 0.41568200  |
| H            | -0.76289300 | 3.60175700  | 1.89923800  | C            | -2.10704900 | 3.04769700  | 1.89216800  |
| H            | 0.83979600  | 4.28221400  | 1.57368500  |              |             |             |             |

|                           |             |             |             |              |             |             |             |
|---------------------------|-------------|-------------|-------------|--------------|-------------|-------------|-------------|
| H                         | -2.60049200 | 2.97209400  | 2.85670200  | C            | 7.36991000  | 1.17680500  | 1.47947300  |
| C                         | -0.91942100 | 2.33739200  | 1.66654300  | H            | 8.42095400  | 0.85971200  | 1.46150300  |
| H                         | -0.47359800 | 1.77187200  | 2.47896400  | H            | 7.28973500  | 2.09185800  | 0.87986600  |
| H                         | -2.40922100 | 4.59339000  | -1.12806400 | H            | 7.11925800  | 1.43430700  | 2.51587100  |
| C                         | 0.91081300  | 1.58925900  | 0.13389100  | C            | 6.68904000  | -0.58474800 | -0.98051200 |
| C                         | 1.93306100  | 1.30087400  | 1.24431500  | H            | 7.71887700  | -0.95801200 | -1.05572000 |
| H                         | 2.07700900  | 2.22549000  | 1.82570200  | H            | 6.02427100  | -1.35241500 | -1.39442500 |
| H                         | 1.35979300  | 1.73336700  | -0.84655400 | H            | 6.60953800  | 0.30315700  | -1.61958000 |
| H                         | 1.54346900  | 0.56318200  | 1.95838000  | C            | 6.38999000  | -1.73712800 | 1.88553200  |
| C                         | 3.23547900  | 0.85559400  | 0.75390200  | H            | 5.72883000  | -2.53432600 | 1.52490900  |
| C                         | 4.33749200  | 0.51167200  | 0.36517900  | H            | 7.41704600  | -2.12525000 | 1.87573900  |
| Br                        | 0.73118500  | -1.48454700 | -1.36678600 | H            | 6.12289600  | -1.52956500 | 2.92893800  |
| Si                        | 5.96901000  | -0.06772900 | -0.26320700 | Pd           | -0.99435100 | 0.13650500  | -0.26474300 |
| C                         | 7.29594000  | 1.18194000  | 0.24020200  | C            | -2.96465400 | -0.60934300 | 0.45671200  |
| H                         | 8.28443300  | 0.86636000  | -0.11902300 | C            | -2.18623500 | -1.49265800 | -0.00727400 |
| H                         | 7.09281400  | 2.17532600  | -0.17860200 | Br           | -1.94748500 | -3.33818600 | -0.41230900 |
| H                         | 7.35771000  | 1.28700200  | 1.33044500  | Si           | -4.50741200 | 0.10626500  | 1.19778400  |
| C                         | 5.87557000  | -0.19761200 | -2.14470000 | C            | -5.68473500 | -1.33001400 | 1.55641600  |
| H                         | 6.82314500  | -0.56535500 | -2.56015400 | H            | -6.62234300 | -0.96327500 | 1.99532900  |
| H                         | 5.08234100  | -0.88839400 | -2.45468700 | H            | -5.93825600 | -1.87901600 | 0.64147500  |
| H                         | 5.66567300  | 0.77591600  | -2.60457400 | H            | -5.24428700 | -2.04466600 | 2.26226400  |
| C                         | 6.34548800  | -1.75558800 | 0.49633400  | C            | -5.29320800 | 1.29642000  | -0.03873200 |
| H                         | 5.57568500  | -2.49033500 | 0.23125400  | H            | -6.20969900 | 1.74015200  | 0.37233300  |
| H                         | 7.31081200  | -2.13877600 | 0.13985100  | H            | -4.61073600 | 2.11227500  | -0.30246800 |
| H                         | 6.39207200  | -1.70305600 | 1.59106000  | H            | -5.56187000 | 0.77717500  | -0.96689600 |
| Pd                        | -0.61156200 | 0.16201500  | 0.06260900  | C            | -4.08132800 | 0.99144400  | 2.81189500  |
| C                         | -2.81912000 | -0.85864100 | -0.06983800 | H            | -3.38971500 | 1.82659100  | 2.65216400  |
| C                         | -2.14999000 | -1.26735200 | 0.88748400  | H            | -4.98768300 | 1.39518100  | 3.28217500  |
| Br                        | -1.68464600 | -2.25859400 | 2.39636500  | H            | -3.61425900 | 0.30433700  | 3.52823000  |
| Si                        | -3.99409600 | -0.46098900 | -1.46585100 |              |             |             |             |
| C                         | -4.74516000 | -2.10817800 | -1.99570500 | <b>INT12</b> |             |             |             |
| H                         | -5.47233400 | -1.95675800 | -2.80435300 | C            | -0.84163500 | 3.73375100  | -1.53408100 |
| H                         | -3.97327800 | -2.79450200 | -2.36357200 | C            | 0.34931600  | 2.99543100  | -1.53408500 |
| H                         | -5.26561100 | -2.60155400 | -1.16616200 | C            | -1.70964200 | 3.65886200  | -0.45054700 |
| C                         | -3.05566100 | 0.34391300  | -2.88400200 | H            | 1.00685100  | 3.02950300  | -2.39913200 |
| H                         | -3.72777800 | 0.50537500  | -3.73742700 | H            | -2.63886600 | 4.22130500  | -0.45355200 |
| H                         | -2.64188800 | 1.31676100  | -2.59487400 | C            | 0.69894900  | 2.21009200  | -0.43404000 |
| H                         | -2.22534000 | -0.28643000 | -3.22116400 | C            | -1.37708500 | 2.86826600  | 0.66414600  |
| C                         | -5.31157200 | 0.69819000  | -0.77178400 | H            | -2.01752800 | 2.86400000  | 1.54009900  |
| H                         | -4.87091500 | 1.63458800  | -0.40962200 | C            | -0.16688100 | 2.15903800  | 0.68775600  |
| H                         | -6.04581800 | 0.95205700  | -1.54765400 | H            | 0.14334800  | 1.65912400  | 1.60195800  |
| H                         | -5.85439200 | 0.23758400  | 0.06245500  | H            | -1.09157800 | 4.34960200  | -2.39323300 |
|                           |             |             |             | C            | 1.95866900  | 1.40673900  | -0.46171700 |
| <b>TS<sub>11-12</sub></b> |             |             |             | C            | 2.92213700  | 1.62752000  | 0.71026200  |
| C                         | -1.34165500 | 3.65405400  | -1.92537200 | H            | 3.10705000  | 2.71253100  | 0.74709800  |
| C                         | -0.26011700 | 2.80603000  | -1.80661400 | H            | 2.47777200  | 1.49781600  | -1.41449000 |
| C                         | -2.14245700 | 3.94622400  | -0.80201700 | H            | 2.43661500  | 1.36853900  | 1.65856300  |
| H                         | 0.36982800  | 2.59313100  | -2.66586300 | C            | 4.19695000  | 0.92503800  | 0.58625200  |
| H                         | -2.97344900 | 4.63928700  | -0.89756500 | C            | 5.26760600  | 0.35441000  | 0.47807600  |
| C                         | 0.07484500  | 2.21621300  | -0.54791700 | Br           | 1.36081200  | -0.61406200 | -0.48408000 |
| C                         | -1.86890400 | 3.35529600  | 0.42199100  | Si           | 6.88062100  | -0.52991300 | 0.31838500  |
| H                         | -2.47731400 | 3.58743700  | 1.29079000  | C            | 8.26983500  | 0.75025500  | 0.32982600  |
| C                         | -0.78741900 | 2.46415300  | 0.56505300  | H            | 9.24847000  | 0.26160500  | 0.23483400  |
| H                         | -0.51093800 | 2.12872500  | 1.55871200  | H            | 8.17110000  | 1.45901700  | -0.50152000 |
| H                         | -1.56766200 | 4.10953100  | -2.88502300 | H            | 8.27714000  | 1.32867800  | 1.26178300  |
| C                         | 1.32221900  | 1.49010800  | -0.41905700 | C            | 6.87926900  | -1.48416500 | -1.31064800 |
| C                         | 1.95989400  | 1.24104100  | 0.93451700  | H            | 7.82223100  | -2.03129700 | -1.44083700 |
| H                         | 1.93921400  | 2.20789800  | 1.46481000  | H            | 6.06244900  | -2.21509800 | -1.34634800 |
| H                         | 2.02135000  | 1.65323000  | -1.22868600 | H            | 6.76320600  | -0.81317200 | -2.17054300 |
| H                         | 1.34269500  | 0.56069800  | 1.53395800  | C            | 7.06420700  | -1.71261400 | 1.77842800  |
| C                         | 3.33967700  | 0.76620800  | 0.88118200  | H            | 6.25397400  | -2.45144000 | 1.79972300  |
| C                         | 4.50147800  | 0.40228800  | 0.86493500  | H            | 8.01357200  | -2.26083600 | 1.71765700  |
| Br                        | 1.28243100  | -0.84337100 | -1.49334100 | H            | 7.05089800  | -1.17617700 | 2.73505200  |
| Si                        | 6.24903200  | -0.19035500 | 0.81234900  | Pd           | -1.47478800 | 0.19000600  | 0.10773300  |

|                |             |             |             |                 |             |             |             |
|----------------|-------------|-------------|-------------|-----------------|-------------|-------------|-------------|
| C              | -3.53863700 | -0.55299200 | 0.21217700  | H               | -5.74104300 | 2.47908400  | 0.50407300  |
| C              | -2.65649200 | -1.42416200 | -0.06194900 | H               | -6.30485100 | -1.05692000 | -1.88247200 |
| Br             | -2.34968700 | -3.27539700 | -0.46181300 | H               | -7.02124900 | 1.23903300  | -1.23355600 |
| Si             | -5.19196800 | 0.21527000  | 0.52643200  |                 |             |             |             |
| C              | -6.49519800 | -1.15687300 | 0.52451600  | <b>[Pd-1b]'</b> |             |             |             |
| H              | -7.49797200 | -0.74355700 | 0.69712500  | Pd              | -0.00034900 | -1.24251300 | 0.00167300  |
| H              | -6.51542000 | -1.68902700 | -0.43438100 | C               | 2.77172400  | 0.00581400  | -0.44287900 |
| H              | -6.30036100 | -1.89644300 | 1.31079200  | C               | 3.81930400  | -0.14817200 | 0.48325300  |
| C              | -5.56386300 | 1.46081500  | -0.84482500 | C               | 2.47255200  | 1.30635200  | -0.89294600 |
| H              | -6.53601300 | 1.94520800  | -0.68330500 | C               | 4.54014700  | 0.95175200  | 0.94764500  |
| H              | -4.79962400 | 2.24567500  | -0.89003800 | H               | 4.06899200  | -1.14547600 | 0.83868800  |
| H              | -5.59322200 | 0.97221400  | -1.82647600 | C               | 3.19310500  | 2.40436700  | -0.43019800 |
| C              | -5.17548400 | 1.07763900  | 2.20810900  | H               | 1.66874500  | 1.46029500  | -1.60693400 |
| H              | -4.44082100 | 1.89124600  | 2.23846700  | C               | 4.23009800  | 2.23476100  | 0.49336300  |
| H              | -6.15947100 | 1.50904800  | 2.43486100  | H               | 5.34538100  | 0.80496500  | 1.66293800  |
| H              | -4.92616600 | 0.37537700  | 3.01300600  | H               | 2.94496000  | 3.39898100  | -0.79198700 |
|                |             |             |             | H               | 4.78975900  | 3.09439500  | 0.85212100  |
| <b>[Pd-1b]</b> |             |             |             | C               | -3.46117500 | 2.52327300  | 0.20812600  |
| Pd             | -0.60651000 | -0.21424600 | 0.02539800  | C               | -2.56623900 | 1.68447800  | 0.87182900  |
| C              | 1.73273500  | 2.04808000  | -0.25327300 | C               | -4.39264700 | 1.98854900  | -0.68355900 |
| C              | 2.62354300  | 2.34507800  | -1.30050300 | H               | -1.84466100 | 2.10735000  | 1.56725300  |
| C              | 2.24707000  | 2.01786300  | 1.05741400  | H               | -5.09246300 | 2.63862100  | -1.20178700 |
| C              | 3.96931700  | 2.61774900  | -1.05201800 | C               | -2.57780500 | 0.29384000  | 0.65999500  |
| H              | 2.24776200  | 2.37758100  | -2.32114500 | C               | -4.41942200 | 0.60710500  | -0.90239500 |
| C              | 3.59016300  | 2.28740500  | 1.30594200  | H               | -5.14269100 | 0.18032100  | -1.59265800 |
| H              | 1.59035600  | 1.77089600  | 1.88689800  | C               | -3.52511200 | -0.23032900 | -0.24056700 |
| C              | 4.46029400  | 2.59234100  | 0.25389800  | H               | -3.56136100 | -1.29988600 | -0.42616300 |
| H              | 4.63282300  | 2.85224600  | -1.88089800 | H               | -3.43149900 | 3.59448600  | 0.39034300  |
| H              | 3.96283200  | 2.25572000  | 2.32683700  | C               | -1.61745300 | -0.54684100 | 1.40853800  |
| H              | 5.50790700  | 2.80284300  | 0.45208200  | C               | 2.05680600  | -1.20059700 | -0.91535100 |
| C              | 4.55063500  | -1.57137000 | -0.76353500 | H               | 2.48924800  | -2.13960200 | -0.57067000 |
| C              | 3.27094100  | -1.39126000 | -1.28851300 | C               | -1.55008800 | -1.93053600 | 1.41802000  |
| C              | 4.71862900  | -2.16104400 | 0.48996900  | H               | -0.99642400 | -2.43816200 | 2.20430100  |
| H              | 3.15067400  | -0.93369200 | -2.26737600 | H               | -1.05288000 | -0.00935900 | 2.16997000  |
| H              | 5.71426300  | -2.30195200 | 0.90223500  | H               | -2.25034300 | -2.55006800 | 0.86292800  |
| C              | 2.12748400  | -1.79632200 | -0.57764700 | C               | 1.09962400  | -1.26488000 | -1.91497500 |
| C              | 3.59161800  | -2.56487800 | 1.21334800  | H               | 0.84918100  | -2.22481100 | -2.36032400 |
| H              | 3.70943500  | -3.02112200 | 2.19327100  | H               | 0.79159900  | -0.39006000 | -2.48238800 |
| C              | 2.31444000  | -2.38347800 | 0.68914600  |                 |             |             |             |
| H              | 1.45194300  | -2.69467700 | 1.27161100  | <b>INT1'</b>    |             |             |             |
| H              | 5.41660500  | -1.24804100 | -1.33545800 | Pd              | 0.01328300  | 0.59910100  | 0.59315100  |
| C              | 0.79744400  | -1.63347200 | -1.20185300 | C               | -4.49163700 | 0.69077900  | -1.87068500 |
| C              | 0.30348100  | 1.84001900  | -0.56770500 | C               | -3.44299500 | 1.37895600  | -1.26170400 |
| H              | 0.06912200  | 1.88017800  | -1.63041400 | C               | -5.12677300 | -0.35491000 | -1.19828100 |
| C              | -0.36042700 | -2.28268700 | -0.80742700 | H               | -2.95249100 | 2.19314200  | -1.79058700 |
| H              | -1.19683200 | -2.35601900 | -1.49866600 | H               | -5.94455700 | -0.89339900 | -1.66951600 |
| H              | 0.81029600  | -1.16261500 | -2.18290600 | C               | -3.00293000 | 1.03804900  | 0.02976100  |
| H              | -0.35335300 | -3.00889600 | 0.00198700  | C               | -4.70354400 | -0.70249600 | 0.08864800  |
| C              | -0.75182700 | 1.96723900  | 0.32842700  | H               | -5.19391000 | -1.51292800 | 0.62178500  |
| H              | -1.75121800 | 2.17866700  | -0.04575300 | C               | -3.65582700 | -0.01553600 | 0.69660200  |
| H              | -0.57255500 | 2.23847000  | 1.36638500  | H               | -3.34273200 | -0.30012900 | 1.69699900  |
| C              | -2.72840000 | -1.06157000 | 1.05882900  | H               | -4.81259500 | 0.97282800  | -2.87011700 |
| H              | -2.63023700 | -2.11434900 | 0.80612600  | C               | -1.89952000 | 1.81722900  | 0.63370200  |
| C              | -1.86964100 | -0.54555700 | 1.99184700  | C               | -1.39104400 | 1.69258200  | 1.91607100  |
| H              | -2.00765500 | 0.43930500  | 2.42572100  | H               | -0.78057400 | 2.48976800  | 2.33457900  |
| H              | -1.17043300 | -1.19758300 | 2.50827500  | H               | -1.61174900 | 2.69987600  | 0.06215400  |
| C              | -3.89117400 | -0.39261900 | 0.44845600  | H               | -1.78908900 | 0.98046900  | 2.63446500  |
| C              | -4.31564200 | 0.90115100  | 0.80946300  | C               | 1.05738600  | -1.08551600 | 0.08557100  |
| C              | -4.63424300 | -1.08284900 | -0.52711700 | C               | 1.92220200  | -0.19009100 | -0.11301300 |
| C              | -5.43011100 | 1.48053000  | 0.20777600  | Br              | 0.55516100  | -2.91539700 | 0.07606100  |
| C              | -5.74934800 | -0.50267300 | -1.13041600 | Si              | 3.43582000  | 0.80995800  | -0.51824000 |
| C              | -6.15171100 | 0.78394900  | -0.76711700 | C               | 4.78582700  | -0.38539800 | -1.08341800 |
| H              | -3.77723800 | 1.45472300  | 1.57282200  | H               | 5.70485300  | 0.15958300  | -1.33676200 |
| H              | -4.32953000 | -2.08731600 | -0.81237500 | H               | 5.03439600  | -1.11013500 | -0.29864000 |

|                           |             |             |             |              |             |             |             |
|---------------------------|-------------|-------------|-------------|--------------|-------------|-------------|-------------|
| H                         | 4.47726300  | -0.94854500 | -1.97251900 | C            | 2.02889700  | -0.07127600 | -0.02618700 |
| C                         | 3.97164800  | 1.73317600  | 1.03747900  | Br           | -0.81745400 | -2.89835100 | 0.15770800  |
| H                         | 4.87602000  | 2.32569900  | 0.84641500  | Si           | 3.84618100  | 0.18906800  | -0.00723800 |
| H                         | 3.18851000  | 2.41826300  | 1.38391100  | C            | 4.21646900  | 2.02023000  | 0.29619000  |
| H                         | 4.19381500  | 1.03945100  | 1.85746300  | H            | 5.29898300  | 2.20465100  | 0.31029700  |
| C                         | 2.99386700  | 2.01809700  | -1.89856000 | H            | 3.78146200  | 2.65241400  | -0.48787300 |
| H                         | 2.19930200  | 2.70625000  | -1.58573000 | H            | 3.80951700  | 2.35590700  | 1.25810000  |
| H                         | 3.86621800  | 2.62039500  | -2.18424800 | C            | 4.56192900  | -0.33695300 | -1.67709000 |
| H                         | 2.64421300  | 1.49070600  | -2.79439900 | H            | 5.65099000  | -0.19734600 | -1.70027200 |
|                           |             |             |             | H            | 4.35630800  | -1.39468600 | -1.88175300 |
|                           |             |             |             | H            | 4.13299400  | 0.24847400  | -2.49976200 |
| <b>TS<sub>1'-2'</sub></b> |             |             |             | C            | 4.60560700  | -0.85079000 | 1.37717300  |
| Pd                        | 0.81034600  | 1.13860100  | -0.30736500 | H            | 4.39837100  | -1.91789200 | 1.23152900  |
| C                         | -3.78021400 | 0.61363600  | -0.52799600 | H            | 5.69578300  | -0.72296900 | 1.41396600  |
| C                         | -2.69470200 | 1.30348200  | -1.07646200 | H            | 4.20269600  | -0.56700700 | 2.35715800  |
| C                         | -4.03902700 | 0.69148700  | 0.84844300  |              |             |             |             |
| H                         | -2.48435400 | 1.23042900  | -2.14497200 | <b>INT3'</b> |             |             |             |
| H                         | -4.88298500 | 0.15187100  | 1.27975200  | C            | -3.12148800 | 4.16170000  | -0.91851800 |
| C                         | -1.84220400 | 2.08377500  | -0.26094000 | C            | -1.88129600 | 3.73450000  | -0.45016800 |
| C                         | -3.20936900 | 1.47436800  | 1.66816200  | C            | -4.28400200 | 3.51427300  | -0.49510500 |
| H                         | -3.41017600 | 1.54520600  | 2.73800000  | H            | -0.97669900 | 4.24241200  | -0.77656700 |
| C                         | -2.12538600 | 2.16630100  | 1.12292200  | H            | -5.25403900 | 3.84500700  | -0.85594800 |
| H                         | -1.49058200 | 2.76934100  | 1.77163700  | C            | -1.77903900 | 2.65133100  | 0.44334500  |
| H                         | -4.42223800 | 0.01284900  | -1.17351400 | C            | -4.19786800 | 2.44104500  | 0.39854800  |
| C                         | -0.66606400 | 2.73076800  | -0.88517900 | H            | -5.10142300 | 1.93851600  | 0.73220400  |
| C                         | 0.34827800  | 3.42131700  | -0.24200300 | C            | -2.95994500 | 2.01069000  | 0.86489100  |
| H                         | 1.08962500  | 3.96415800  | -0.82846800 | H            | -2.90721300 | 1.17296600  | 1.55068500  |
| H                         | -0.66702700 | 2.73121100  | -1.97966100 | H            | -3.18084900 | 4.99765700  | -1.60971200 |
| H                         | 0.32896100  | 3.63015600  | 0.82844700  | C            | -0.44467300 | 2.27839200  | 0.92564000  |
| C                         | 1.26449400  | -0.73642800 | 0.02089000  | C            | -0.09746600 | 1.26706400  | 1.80274400  |
| C                         | 0.63111800  | -1.81703100 | -0.00793000 | H            | 0.87285500  | 1.27823700  | 2.28980000  |
| Br                        | 3.25558400  | 0.03200600  | 0.41382400  | H            | 0.33093900  | 2.99403300  | 0.65964800  |
| Si                        | -0.64663800 | -3.14291700 | -0.09473000 | H            | -0.84170200 | 0.61782300  | 2.24835000  |
| C                         | 0.21769000  | -4.82861400 | -0.08517700 | C            | -1.04089800 | -0.82096000 | 0.11107900  |
| H                         | -0.52446100 | -5.64153400 | -0.13910000 | C            | -2.01250200 | -1.54076600 | 0.32787600  |
| H                         | 0.89768300  | -4.93424100 | -0.94407400 | Br           | 1.14084400  | -1.34700200 | -2.00100700 |
| H                         | 0.80815600  | -4.97133100 | 0.83256500  | Si           | -3.42618400 | -2.68230300 | 0.57585900  |
| C                         | -1.62428000 | -2.90480300 | -1.69932100 | C            | -4.45698600 | -2.11063400 | 2.05959000  |
| H                         | -2.40949200 | -3.67159400 | -1.79933800 | H            | -5.28717800 | -2.80443000 | 2.24838900  |
| H                         | -2.10864400 | -1.91685600 | -1.71289400 | H            | -3.85377900 | -2.06178400 | 2.97489600  |
| H                         | -0.96832900 | -2.97344200 | -2.58042900 | H            | -4.89182800 | -1.11699700 | 1.89295100  |
| C                         | -1.78777600 | -2.96876900 | 1.40530800  | C            | -2.76682600 | -4.42319700 | 0.90782700  |
| H                         | -2.27744500 | -1.98338200 | 1.41087300  | H            | -3.58898000 | -5.13677200 | 1.05300100  |
| H                         | -2.57413600 | -3.74088500 | 1.39070900  | H            | -2.15587100 | -4.78102500 | 0.07030500  |
| H                         | -1.22835200 | -3.07392600 | 2.34733500  | H            | -2.13981900 | -4.44854900 | 1.80768400  |
|                           |             |             |             | C            | -4.50551100 | -2.68348800 | -0.97689200 |
| <b>INT2'</b>              |             |             |             | H            | -3.93599400 | -3.01508600 | -1.85351600 |
| Pd                        | -1.11555700 | -0.42284200 | -0.08190300 | H            | -5.36502100 | -3.35722500 | -0.86061000 |
| C                         | -1.21155800 | 3.47649200  | 1.19395500  | H            | -4.89333900 | -1.68095000 | -1.19577100 |
| C                         | -2.05308000 | 2.38060800  | 1.29677600  | Pd           | 0.50237900  | 0.32992500  | -0.17839400 |
| C                         | -0.67877700 | 3.84371300  | -0.05153200 | C            | 2.80950200  | 1.56373100  | 0.10717900  |
| H                         | -2.45898700 | 2.08641900  | 2.26076800  | H            | 2.52400800  | 2.24994500  | 0.90371900  |
| H                         | -0.01641400 | 4.70138800  | -0.12327300 | C            | 3.86183400  | 0.61393400  | 0.49218400  |
| C                         | -2.39837300 | 1.62425800  | 0.14661000  | C            | 4.33114800  | 0.64325500  | 1.81885200  |
| C                         | -0.99572700 | 3.11297400  | -1.19305500 | C            | 4.44373400  | -0.29905800 | -0.40813600 |
| H                         | -0.58781100 | 3.39799600  | -2.15779500 | C            | 5.34638200  | -0.21371600 | 2.23890400  |
| C                         | -1.85208400 | 2.01081800  | -1.10841400 | H            | 3.89780800  | 1.35081800  | 2.52240000  |
| H                         | -2.14466800 | 1.49574800  | -2.01776500 | C            | 5.45526100  | -1.15601700 | 0.01381900  |
| H                         | -0.95716300 | 4.04694500  | 2.08222900  | H            | 4.09216800  | -0.34921800 | -1.43247500 |
| C                         | -3.23347400 | 0.42224300  | 0.30691400  | C            | 5.91026400  | -1.11748700 | 1.33630900  |
| C                         | -3.49571600 | -0.49572200 | -0.66967400 | H            | 5.69626200  | -0.17607100 | 3.26674600  |
| H                         | -4.03866400 | -1.40263300 | -0.42587300 | H            | 5.89034400  | -1.85923900 | -0.69072000 |
| H                         | -3.57987800 | 0.22100400  | 1.31834400  | H            | 6.70127000  | -1.78880000 | 1.65925100  |
| H                         | -3.29942800 | -0.32190300 | -1.72356500 | C            | 2.24658700  | 1.75370800  | -1.12092400 |
| C                         | 0.81187100  | -0.24333900 | -0.03589100 |              |             |             |             |



|                           |             |             |             |              |             |             |             |
|---------------------------|-------------|-------------|-------------|--------------|-------------|-------------|-------------|
| H                         | 2.55131500  | 1.18793700  | -1.99327200 | H            | -3.01844900 | -1.22617700 | 0.91542100  |
| H                         | 1.60707100  | 2.61174000  | -1.30635800 | H            | -5.33330700 | 2.92386800  | -0.52836100 |
| <b>TS<sub>3'-4'</sub></b> |             |             |             | C            | -1.62903900 | 1.07160300  | 1.57343300  |
| C                         | 2.19890500  | 4.88418600  | 0.06055300  | C            | -1.21554300 | -0.00005300 | 2.58695700  |
| C                         | 1.91952600  | 3.69710900  | 0.73705200  | H            | -0.50218800 | 0.42267100  | 3.30387400  |
| C                         | 1.24190300  | 5.45071300  | -0.78376800 | H            | -1.44252800 | 2.08597600  | 1.92632500  |
| H                         | 2.66430000  | 3.26915100  | 1.40426800  | H            | -2.06918700 | -0.38016800 | 3.16629100  |
| H                         | 1.45864100  | 6.37327600  | -1.31502000 | C            | -0.56051000 | -1.09319500 | 1.84603700  |
| C                         | 0.67509500  | 3.05596700  | 0.58960200  | C            | -0.03134600 | -1.98149000 | 1.18836000  |
| C                         | 0.00309800  | 4.82108100  | -0.94465400 | Br           | 0.38209000  | -0.34263400 | -2.42054800 |
| H                         | -0.74383700 | 5.25172200  | -1.60595000 | Si           | 0.77002600  | -3.48019100 | 0.42194100  |
| C                         | -0.28019000 | 3.63722300  | -0.26868300 | C            | 0.85209800  | -4.77013000 | 1.80399200  |
| H                         | -1.23862000 | 3.14985200  | -0.42362100 | H            | 1.31481900  | -5.69519300 | 1.43517800  |
| H                         | 3.16334500  | 5.36649500  | 0.19487200  | H            | 1.44983800  | -4.41639700 | 2.65290700  |
| C                         | 0.41735700  | 1.81308800  | 1.34049800  | H            | -0.14589400 | -5.02644100 | 2.18009700  |
| C                         | -0.86984300 | 1.37402900  | 1.71793000  | C            | 2.49930000  | -3.01530100 | -0.15630400 |
| H                         | -0.95289800 | 0.72024800  | 2.57790300  | H            | 3.00873800  | -3.88554900 | -0.59083900 |
| H                         | 1.24071200  | 1.44726500  | 1.94994100  | H            | 2.44925600  | -2.23208400 | -0.92070600 |
| H                         | -1.72244000 | 2.01245500  | 1.52687700  | H            | 3.11511300  | -2.64620600 | 0.67304300  |
| C                         | -1.67728900 | -0.03831100 | 0.44018200  | C            | -0.31398400 | -4.08747000 | -0.99170500 |
| C                         | -2.86409600 | -0.36347600 | 0.51645100  | H            | -0.40802200 | -3.31274400 | -1.76078500 |
| Br                        | -0.19296200 | -1.74904900 | -1.87710300 | H            | 0.12359500  | -4.98010900 | -1.45792500 |
| Si                        | -4.62155800 | -0.90905300 | 0.56594700  | H            | -1.32043900 | -4.35238300 | -0.64446400 |
| C                         | -5.56481500 | 0.19561400  | 1.78091800  | Pd           | -0.36700500 | 0.59497700  | -0.03681100 |
| H                         | -6.62030900 | -0.10255700 | 1.83497300  | C            | 0.92499200  | 2.43149700  | 0.47622200  |
| H                         | -5.15087300 | 0.12839700  | 2.79473800  | H            | 0.57787500  | 2.73562300  | 1.46140500  |
| H                         | -5.53506000 | 1.24933100  | 1.47673200  | C            | 2.36519400  | 2.13186000  | 0.42574000  |
| C                         | -4.68906700 | -2.70560600 | 1.14488000  | C            | 3.09506100  | 2.18040900  | 1.62860400  |
| H                         | -5.72495900 | -3.06838600 | 1.17885700  | C            | 3.05378500  | 1.83798800  | -0.76688500 |
| H                         | -4.12618600 | -3.36018800 | 0.46881000  | C            | 4.46885200  | 1.94802600  | 1.64428900  |
| H                         | -4.26224700 | -2.82019200 | 2.14887400  | H            | 2.57569600  | 2.41009200  | 2.55659500  |
| C                         | -5.35974800 | -0.74049300 | -1.16427300 | C            | 4.42583200  | 1.60554200  | -0.74863000 |
| H                         | -4.80515700 | -1.34595100 | -1.89097300 | H            | 2.50885700  | 1.76115500  | -1.70148800 |
| H                         | -6.40651600 | -1.07209800 | -1.17835100 | C            | 5.13932400  | 1.65987600  | 0.45362700  |
| H                         | -5.33383900 | 0.29967100  | -1.51156200 | H            | 5.01455000  | 1.99259100  | 2.58295300  |
| Pd                        | 0.23613300  | 0.11053500  | -0.11568800 | H            | 4.94152000  | 1.37508500  | -1.67684000 |
| C                         | 2.76735400  | 0.06829000  | -0.04133600 | H            | 6.21041400  | 1.47650100  | 0.46072800  |
| H                         | 2.93864500  | 0.84513000  | 0.70044600  | C            | 0.05756100  | 2.64907800  | -0.59773800 |
| C                         | 3.26420900  | -1.25728000 | 0.35699400  | H            | 0.40480100  | 2.61575800  | -1.62523700 |
| C                         | 3.79321500  | -1.40542700 | 1.65271900  | H            | -0.87027800 | 3.18919800  | -0.43139500 |
| C                         | 3.27144700  | -2.37100500 | -0.50388400 | <b>INT5'</b> |             |             |             |
| C                         | 4.31062900  | -2.62616000 | 2.08147000  | C            | 3.43087800  | 3.46760300  | -0.02919900 |
| H                         | 3.80049100  | -0.55047200 | 2.32555400  | C            | 2.12881200  | 3.10115300  | 0.27922700  |
| C                         | 3.78717100  | -3.58990200 | -0.07372000 | C            | 4.01389000  | 3.04652300  | -1.23191600 |
| H                         | 2.85513600  | -2.28665300 | -1.50134000 | H            | 1.67032600  | 3.43142000  | 1.20744100  |
| C                         | 4.30784000  | -3.72335000 | 1.21783700  | H            | 5.03505900  | 3.33282500  | -1.46665600 |
| H                         | 4.71493900  | -2.72052500 | 3.08560000  | C            | 1.35699800  | 2.31619900  | -0.62493000 |
| H                         | 3.78122600  | -4.44169900 | -0.74814500 | C            | 3.29243900  | 2.25104100  | -2.12228500 |
| H                         | 4.70953100  | -4.67782600 | 1.54713800  | H            | 3.75093600  | 1.91288800  | -3.04667600 |
| C                         | 2.27250700  | 0.46850200  | -1.25392700 | C            | 1.98048500  | 1.88123300  | -1.82854000 |
| H                         | 2.19815000  | -0.20282800 | -2.10102600 | H            | 1.42077200  | 1.28142900  | -2.53920300 |
| H                         | 2.13990200  | 1.52647600  | -1.45967300 | H            | 3.99970900  | 4.07701900  | 0.66677500  |
| <b>INT4'</b>              |             |             |             | C            | 0.02665800  | 1.84854900  | -0.23907000 |
| C                         | -4.82297600 | 2.01640400  | -0.21697000 | C            | -1.02613700 | 1.58956000  | -1.32239100 |
| C                         | -3.60986200 | 2.10217000  | 0.45601800  | H            | -1.07152800 | 2.47311300  | -1.97920500 |
| C                         | -5.38759500 | 0.76505800  | -0.49029900 | H            | -0.38740400 | 2.34946700  | 0.63678500  |
| H                         | -3.18080500 | 3.07769600  | 0.67274600  | H            | -0.73357600 | 0.75402800  | -1.97116400 |
| H                         | -6.33388400 | 0.69760000  | -1.01977100 | C            | -2.36800300 | 1.34845000  | -0.79035900 |
| C                         | -2.92774900 | 0.94045900  | 0.88363000  | C            | -3.48920000 | 1.16300700  | -0.34758300 |
| C                         | -4.73031900 | -0.39483700 | -0.07616500 | Br           | 3.49134400  | -1.00273100 | 0.96567100  |
| H                         | -5.16329100 | -1.36960100 | -0.28336700 | Si           | -5.19524600 | 0.91578300  | 0.31607600  |
| C                         | -3.51609700 | -0.31330000 | 0.60427600  | C            | -5.07521600 | 0.61129800  | 2.17615300  |
|                           |             |             |             | H            | -6.07248500 | 0.46073300  | 2.60988500  |

|                           |             |             |             |              |             |             |             |
|---------------------------|-------------|-------------|-------------|--------------|-------------|-------------|-------------|
| H                         | -4.47836400 | -0.28105400 | 2.40148200  | C            | -0.66856300 | 1.87777700  | -1.87443600 |
| H                         | -4.61355100 | 1.46086100  | 2.69418300  | C            | -1.46693500 | 1.23043200  | -2.83449600 |
| C                         | -5.96747600 | -0.57541900 | -0.54789800 | C            | -1.24919500 | 2.89291900  | -1.09064700 |
| H                         | -6.98753200 | -0.75046100 | -0.18147400 | C            | -2.80232700 | 1.58828200  | -3.01634100 |
| H                         | -6.02592400 | -0.42603000 | -1.63297800 | H            | -1.03043600 | 0.44505400  | -3.44772700 |
| H                         | -5.38962700 | -1.49020000 | -0.36738400 | C            | -2.58375200 | 3.24593800  | -1.27025300 |
| C                         | -6.20428300 | 2.47365800  | -0.03185300 | H            | -0.66186400 | 3.38855800  | -0.32415400 |
| H                         | -6.27029400 | 2.67886100  | -1.10727000 | C            | -3.36539800 | 2.59821000  | -2.23340300 |
| H                         | -7.22822100 | 2.36596300  | 0.34944100  | H            | -3.40045600 | 1.08109000  | -3.76871200 |
| H                         | -5.76217100 | 3.35482100  | 0.44889900  | H            | -3.01815800 | 4.02791300  | -0.65349300 |
| Pd                        | 1.24585600  | 0.25210600  | 0.40350200  | H            | -4.40595800 | 2.87978200  | -2.37060200 |
| C                         | -0.56121600 | -1.18466400 | 0.77150200  | C            | 1.73594700  | 2.10192000  | -1.04814400 |
| H                         | -1.42375600 | -0.57028800 | 0.52852100  | H            | 1.57106500  | 3.02758700  | -0.50852100 |
| C                         | -0.44394300 | -2.40928000 | -0.03895800 | H            | 2.77032600  | 1.79556700  | -1.17832700 |
| C                         | -1.41743200 | -2.64137700 | -1.02937800 |              |             |             |             |
| C                         | 0.56802500  | -3.37049100 | 0.14911000  | <b>INT6'</b> |             |             |             |
| C                         | -1.38774300 | -3.79976100 | -1.80489700 | C            | 5.07909000  | 1.64532100  | 2.04934500  |
| H                         | -2.20624300 | -1.90807700 | -1.18096000 | C            | 3.69886200  | 1.52226900  | 1.89747200  |
| C                         | 0.59536600  | -4.52498100 | -0.62749900 | C            | 5.89197700  | 1.81361500  | 0.92751800  |
| H                         | 1.35048400  | -3.19624800 | 0.88019400  | H            | 3.06863100  | 1.40037300  | 2.77534600  |
| C                         | -0.38084700 | -4.74610300 | -1.60550000 | H            | 6.96836500  | 1.90732000  | 1.04106600  |
| H                         | -2.15021300 | -3.96293000 | -2.56194800 | C            | 3.10303100  | 1.56622100  | 0.62302500  |
| H                         | 1.38615800  | -5.25426800 | -0.47411100 | C            | 5.31367900  | 1.85981600  | -0.34614900 |
| H                         | -0.35324600 | -5.64972200 | -2.20865000 | H            | 5.94109300  | 1.98814500  | -1.22379100 |
| C                         | 0.12508800  | -0.86877000 | 1.93650900  | C            | 3.93668100  | 1.73707400  | -0.49963900 |
| H                         | 0.84683800  | -1.54466400 | 2.38314000  | H            | 3.50919600  | 1.76160000  | -1.49745100 |
| H                         | -0.26198400 | -0.08632500 | 2.58483300  | H            | 5.51739600  | 1.61041700  | 3.04287100  |
|                           |             |             |             | C            | 1.63750000  | 1.45793900  | 0.54154600  |
| <b>TS<sub>5'-6'</sub></b> |             |             |             | C            | 0.83904600  | 1.73272800  | -0.57207200 |
| C                         | 4.52355400  | -2.15963600 | -2.16957500 | H            | 1.31512500  | 2.03349700  | -1.50227800 |
| C                         | 3.17420000  | -1.89712100 | -1.94099700 | H            | 1.13271100  | 1.39962200  | 1.50294300  |
| C                         | 5.39833200  | -2.31593600 | -1.09221600 | H            | 1.74475900  | -0.20990900 | -1.81376200 |
| H                         | 2.49555100  | -1.78547100 | -2.78348200 | C            | -0.55693300 | 2.00264600  | -0.50038100 |
| H                         | 6.45122700  | -2.51811700 | -1.26776300 | C            | -1.74190200 | 2.30515000  | -0.50466300 |
| C                         | 2.66946600  | -1.78989500 | -0.63080700 | Br           | 1.15434700  | -2.80595200 | -1.62945100 |
| C                         | 4.91214200  | -2.20948700 | 0.21498100  | Si           | -3.51943300 | 2.80904500  | -0.58503700 |
| H                         | 5.58779300  | -2.32555200 | 1.05785600  | C            | -4.16456200 | 3.04810700  | 1.17381900  |
| C                         | 3.56449100  | -1.94870100 | 0.44671900  | H            | -5.21058300 | 3.38123100  | 1.15692500  |
| H                         | 3.20989600  | -1.85392300 | 1.46897900  | H            | -4.12445200 | 2.11635900  | 1.75049300  |
| H                         | 4.89126700  | -2.24373100 | -3.18858400 | H            | -3.58521000 | 3.80464100  | 1.71700400  |
| C                         | 1.23532800  | -1.51275500 | -0.44870300 | C            | -4.48738800 | 1.46028100  | -1.47996600 |
| C                         | 0.50445000  | -1.78122600 | 0.74234400  | H            | -5.55004300 | 1.72838400  | -1.54882600 |
| H                         | 1.00725500  | -2.31800900 | 1.54587000  | H            | -4.11401900 | 1.31254300  | -2.50047100 |
| H                         | 0.64784600  | -1.44098400 | -1.36003000 | H            | -4.41653800 | 0.49886100  | -0.95813300 |
| H                         | 0.77193600  | -0.43039100 | 1.77313900  | C            | -3.61096700 | 4.43737100  | -1.53750900 |
| C                         | -0.91985000 | -1.91482100 | 0.70764400  | H            | -3.21778100 | 4.32972500  | -2.55559800 |
| C                         | -2.13142100 | -2.05890500 | 0.67887300  | H            | -4.65127800 | 4.77941800  | -1.61718900 |
| Br                        | 0.99679400  | 2.33941100  | 2.32621500  | H            | -3.03784200 | 5.22908600  | -1.03990000 |
| Si                        | -3.97514900 | -2.19209900 | 0.60915100  | Pd           | 1.09037800  | -0.53553400 | -0.46911600 |
| C                         | -4.46386900 | -2.58843000 | -1.17136300 | C            | -0.44993300 | -1.08925200 | 1.80027300  |
| H                         | -5.55470700 | -2.67098600 | -1.26458700 | H            | -0.51906500 | -0.07353000 | 2.18804000  |
| H                         | -4.12987700 | -1.80189000 | -1.85898100 | C            | -1.74872400 | -1.71228500 | 1.50283500  |
| H                         | -4.02890700 | -3.53701500 | -1.50900600 | C            | -2.91638000 | -1.05165500 | 1.92574700  |
| C                         | -4.69866600 | -0.53465600 | 1.14503400  | C            | -1.87741300 | -2.95531000 | 0.85520200  |
| H                         | -5.79604200 | -0.56205800 | 1.11639500  | C            | -4.17497100 | -1.61660500 | 1.72149600  |
| H                         | -4.39718300 | -0.27759000 | 2.16754600  | H            | -2.82940900 | -0.09242100 | 2.43079700  |
| H                         | -4.36535100 | 0.27675900  | 0.48703100  | C            | -3.13519200 | -3.51284300 | 0.64194700  |
| C                         | -4.51716700 | -3.57425700 | 1.77475600  | H            | -0.99409200 | -3.47103800 | 0.49339700  |
| H                         | -4.21568900 | -3.36732700 | 2.80875100  | C            | -4.28780800 | -2.84981100 | 1.07608100  |
| H                         | -5.60947300 | -3.68412600 | 1.76311600  | H            | -5.06443200 | -1.09511500 | 2.06490200  |
| H                         | -4.08311400 | -4.53952800 | 1.48697700  | H            | -3.21745900 | -4.46848400 | 0.13141500  |
| Pd                        | 1.03181700  | 0.48419500  | 0.50882000  | H            | -5.26654300 | -3.29183900 | 0.90994300  |
| C                         | 0.74283000  | 1.47161200  | -1.74749600 | C            | 0.77702300  | -1.66738000 | 1.74482900  |
| H                         | 1.03218500  | 0.64380300  | -2.39189900 | H            | 0.91697900  | -2.70532600 | 1.46271200  |

|              |             |             |             |
|--------------|-------------|-------------|-------------|
| H            | 1.64876200  | -1.15768700 | 2.14564300  |
| <b>INT7'</b> |             |             |             |
| C            | -2.54771300 | 3.57859300  | -1.72292700 |
| C            | -1.41377600 | 2.77036800  | -1.72592200 |
| C            | -2.93487700 | 4.24009700  | -0.55403300 |
| H            | -1.11633500 | 2.25522300  | -2.63567300 |
| H            | -3.81385400 | 4.87877700  | -0.55339800 |
| C            | -0.64991000 | 2.59431100  | -0.55645600 |
| C            | -2.17636600 | 4.08914600  | 0.61052200  |
| H            | -2.45745900 | 4.61916500  | 1.51660600  |
| C            | -1.04422200 | 3.27503900  | 0.61134900  |
| H            | -0.44419900 | 3.19923100  | 1.51360800  |
| H            | -3.12749700 | 3.69576200  | -2.63413900 |
| C            | 0.56189300  | 1.75883500  | -0.61946200 |
| C            | 1.27921100  | 1.27631000  | 0.47772100  |
| H            | 0.89592400  | 1.46314800  | 1.47978900  |
| H            | 1.04754900  | 1.72150400  | -1.59041700 |
| H            | 0.86411100  | -0.57813800 | -1.58079400 |
| C            | 2.63832500  | 0.85623000  | 0.40933800  |
| C            | 3.81611400  | 0.52823400  | 0.39559400  |
| Br           | -0.63227000 | -2.75615600 | -1.18726900 |
| Si           | 5.59571100  | 0.03236500  | 0.33015200  |
| C            | 6.51444700  | 0.96144200  | 1.69415500  |
| H            | 7.58026900  | 0.69816800  | 1.69368000  |
| H            | 6.44052100  | 2.04772700  | 1.56161300  |
| H            | 6.11371500  | 0.71864600  | 2.68597100  |
| C            | 6.27507700  | 0.49456000  | -1.36930000 |
| H            | 7.33320900  | 0.21370700  | -1.45303700 |
| H            | 5.72984000  | -0.01850800 | -2.17074000 |
| H            | 6.20201600  | 1.57333700  | -1.55280400 |
| C            | 5.70745700  | -1.83189300 | 0.60449300  |
| H            | 5.15357200  | -2.38619800 | -0.16264800 |
| H            | 6.75316100  | -2.16491300 | 0.56764100  |
| H            | 5.30072800  | -2.12169400 | 1.58078900  |
| Pd           | 0.05391200  | -0.47849600 | -0.28488900 |
| C            | -1.81698800 | -0.22664500 | 1.70934200  |
| H            | -1.70436900 | 0.84477200  | 1.86771800  |
| C            | -3.15499400 | -0.62959300 | 1.25050100  |
| C            | -4.09138800 | 0.37612800  | 0.94859500  |
| C            | -3.55404900 | -1.97434500 | 1.13328800  |
| C            | -5.38348200 | 0.05292000  | 0.53782100  |
| H            | -3.79619500 | 1.41885800  | 1.03297000  |
| C            | -4.84423400 | -2.29587100 | 0.72226100  |
| H            | -2.85274500 | -2.77020400 | 1.35829500  |
| C            | -5.76398900 | -1.28545500 | 0.42314900  |
| H            | -6.09128200 | 0.84471900  | 0.30761300  |
| H            | -5.13467100 | -3.33920700 | 0.63411000  |
| H            | -6.77071900 | -1.54210800 | 0.10424400  |
| C            | -0.76589800 | -1.02833400 | 2.02123100  |
| H            | -0.81712500 | -2.11014900 | 1.95569400  |
| H            | 0.11755600  | -0.61893700 | 2.50292700  |

**TS7'-g'**

|   |            |            |             |
|---|------------|------------|-------------|
| C | 2.13006500 | 5.02434200 | -0.09950100 |
| C | 1.06400400 | 4.19219300 | 0.24197600  |
| C | 3.13434300 | 4.55882700 | -0.94905700 |
| H | 0.28409900 | 4.55652800 | 0.90622400  |
| H | 3.96951800 | 5.20222800 | -1.21165500 |
| C | 0.98127000 | 2.88673500 | -0.26871000 |
| C | 3.06794600 | 3.25537100 | -1.45266300 |
| H | 3.85417000 | 2.88233600 | -2.10308300 |
| C | 2.00368500 | 2.42400900 | -1.11511000 |
| H | 1.98087400 | 1.40598100 | -1.49267300 |

|    |             |             |             |
|----|-------------|-------------|-------------|
| H  | 2.17616200  | 6.03288300  | 0.30176800  |
| C  | -0.20723500 | 2.07703900  | 0.08605100  |
| C  | -0.75411500 | 1.05729300  | -0.73532500 |
| H  | -0.24230500 | 0.82954500  | -1.66838300 |
| H  | -0.89565600 | 2.55346500  | 0.78029100  |
| H  | 0.40653900  | 1.22672200  | 1.54352500  |
| C  | -2.12914500 | 0.68953000  | -0.66693500 |
| C  | -3.30792700 | 0.36133500  | -0.64827600 |
| Br | 1.37203500  | -0.95653200 | 3.00165000  |
| Si | -5.09013000 | -0.12395100 | -0.59160400 |
| C  | -6.04424100 | 1.22806200  | 0.31605000  |
| H  | -7.11177700 | 0.97763000  | 0.37100700  |
| H  | -5.67975300 | 1.35589200  | 1.34252600  |
| H  | -5.95533700 | 2.19532700  | -0.19320200 |
| C  | -5.23041900 | -1.76732100 | 0.32744100  |
| H  | -6.27849500 | -2.08858300 | 0.38959500  |
| H  | -4.66993400 | -2.56215100 | -0.17994100 |
| H  | -4.84575900 | -1.68829300 | 1.35153600  |
| C  | -5.71203200 | -0.30288800 | -2.36558300 |
| H  | -5.15191100 | -1.06996700 | -2.91415500 |
| H  | -6.77038300 | -0.59480700 | -2.37544800 |
| H  | -5.62195400 | 0.63824400  | -2.92142100 |
| Pd | 0.23590100  | -0.15949300 | 0.82180200  |
| C  | 0.22780200  | -2.03172000 | -0.86904700 |
| H  | -0.47330000 | -1.63790400 | -1.60266200 |
| C  | 1.59944100  | -2.22942400 | -1.37100400 |
| C  | 1.85234700  | -1.99944000 | -2.73565300 |
| C  | 2.66337100  | -2.65398600 | -0.55208700 |
| C  | 3.12448000  | -2.19687700 | -3.27246600 |
| H  | 1.03835700  | -1.67527600 | -3.38062700 |
| C  | 3.93311700  | -2.84607300 | -1.08906700 |
| H  | 2.50099700  | -2.81002900 | 0.50975100  |
| C  | 4.16938000  | -2.62096800 | -2.44978000 |
| H  | 3.29819500  | -2.01963100 | -4.33046900 |
| H  | 4.74459700  | -3.16843700 | -0.44237800 |
| H  | 5.16288600  | -2.77279600 | -2.86294600 |
| C  | -0.28069800 | -2.42154200 | 0.33764900  |
| H  | 0.30681500  | -2.96156800 | 1.07140500  |
| H  | -1.35016200 | -2.36370400 | 0.51980300  |

**INT8'**

|    |             |             |             |
|----|-------------|-------------|-------------|
| C  | 0.87476700  | 5.35389700  | 0.24142600  |
| C  | 0.00178600  | 4.30506500  | 0.53698800  |
| C  | 2.24258800  | 5.10984500  | 0.10038500  |
| H  | -1.06216800 | 4.50145400  | 0.64726400  |
| H  | 2.92245600  | 5.92675200  | -0.12620500 |
| C  | 0.48579100  | 2.99982900  | 0.69491400  |
| C  | 2.73343300  | 3.81193400  | 0.25921000  |
| H  | 3.79721600  | 3.61338200  | 0.15994600  |
| C  | 1.85987900  | 2.76453900  | 0.55701200  |
| H  | 2.24975500  | 1.75709500  | 0.69294800  |
| H  | 0.48523800  | 6.36178400  | 0.12441000  |
| C  | -0.47241300 | 1.86335600  | 0.98116200  |
| C  | -0.82666900 | 1.01166800  | -0.23711000 |
| H  | -0.34498500 | 1.33503800  | -1.16076400 |
| H  | -1.38395500 | 2.20802200  | 1.48048900  |
| H  | 0.00026300  | 1.19842100  | 1.76870900  |
| C  | -2.17572800 | 0.58399600  | -0.39679900 |
| C  | -3.33429800 | 0.20885500  | -0.53640300 |
| Br | 1.27171100  | -1.98383100 | 2.54310500  |
| Si | -5.08748200 | -0.34310900 | -0.73150700 |
| C  | -6.10214300 | 0.40030600  | 0.67539500  |
| H  | -7.15271900 | 0.09055300  | 0.60003900  |
| H  | -5.72912000 | 0.07465600  | 1.65397100  |

|              |             |             |             |                            |             |             |             |
|--------------|-------------|-------------|-------------|----------------------------|-------------|-------------|-------------|
| H            | -6.07690100 | 1.49662300  | 0.65581100  | H                          | -2.75919600 | 1.52722500  | -0.90892000 |
| C            | -5.12604000 | -2.22928000 | -0.65533100 | H                          | -2.63267400 | 0.54041500  | -2.46330000 |
| H            | -6.15473100 | -2.59876600 | -0.75964200 | C                          | -3.24511400 | -0.75252400 | 0.74312100  |
| H            | -4.52964700 | -2.67810600 | -1.45911500 | C                          | -3.57887200 | -2.03152100 | 1.22346500  |
| H            | -4.73444400 | -2.60052400 | 0.29944800  | C                          | -3.26799600 | 0.32790600  | 1.64482900  |
| C            | -5.71851500 | 0.26553000  | -2.40395000 | C                          | -3.92871800 | -2.22674500 | 2.55882900  |
| H            | -5.12281500 | -0.13921000 | -3.23119400 | H                          | -3.55766700 | -2.87616300 | 0.54001400  |
| H            | -6.75929500 | -0.04707900 | -2.56033200 | C                          | -3.61591200 | 0.13210500  | 2.97850100  |
| H            | -5.68660100 | 1.35961200  | -2.47333200 | H                          | -3.00793700 | 1.32537000  | 1.30438300  |
| Pd           | 0.24963800  | -0.56336900 | 0.60586500  | C                          | -3.94829000 | -1.14548600 | 3.44162100  |
| C            | 0.75483500  | -1.31100000 | -1.52942600 | H                          | -4.18315000 | -3.22338000 | 2.90904300  |
| H            | 0.19616300  | -0.64992500 | -2.18786500 | H                          | -3.62924100 | 0.97818300  | 3.66060100  |
| C            | 2.20765400  | -1.31486800 | -1.76112800 | H                          | -4.21936200 | -1.29457000 | 4.48332400  |
| C            | 2.72453400  | -0.46779200 | -2.75921300 |                            |             |             |             |
| C            | 3.09857500  | -2.14487000 | -1.05277900 | <b>TS<sub>9'-10'</sub></b> |             |             |             |
| C            | 4.08734500  | -0.45365000 | -3.05036100 | C                          | 5.63535200  | -1.57506900 | 1.01705900  |
| H            | 2.04645400  | 0.17736700  | -3.31316900 | C                          | 4.33779700  | -1.10578100 | 1.23017800  |
| C            | 4.45908800  | -2.12680400 | -1.34397100 | C                          | 6.56564000  | -0.78403800 | 0.34024800  |
| H            | 2.72951400  | -2.78329700 | -0.25668800 | H                          | 3.61550100  | -1.72944800 | 1.74987600  |
| C            | 4.95906000  | -1.28416000 | -2.34306200 | H                          | 7.57546600  | -1.14957300 | 0.17369200  |
| H            | 4.46736200  | 0.20445900  | -3.82692900 | C                          | 3.95279600  | 0.15981100  | 0.77234100  |
| H            | 5.13446200  | -2.76922300 | -0.78583400 | C                          | 6.19294700  | 0.48158800  | -0.11859100 |
| H            | 6.02268400  | -1.27456900 | -2.56520000 | H                          | 6.91239700  | 1.10702600  | -0.64068200 |
| C            | 0.01578900  | -2.22206100 | -0.77655800 | C                          | 4.89724800  | 0.95032500  | 0.10152700  |
| H            | 0.48085400  | -3.07650100 | -0.29545500 | H                          | 4.62009100  | 1.94440600  | -0.24477000 |
| H            | -1.05944500 | -2.28140800 | -0.92108900 | H                          | 5.91714500  | -2.56085600 | 1.37755700  |
| <b>INT9'</b> |             |             |             | C                          | 2.55722600  | 0.68814600  | 1.02041100  |
| C            | 5.87845300  | -1.51991600 | 0.50192800  | C                          | 1.71655200  | 0.93105400  | -0.21955100 |
| C            | 4.51259600  | -1.71987800 | 0.29322300  | H                          | 2.25314900  | 1.09366200  | -1.15040600 |
| C            | 6.31667100  | -0.49017600 | 1.33766700  | H                          | 2.62521200  | 1.67753900  | 1.50317300  |
| H            | 4.17673300  | -2.52827400 | -0.35266700 | H                          | 2.00316300  | 0.05387600  | 1.71811200  |
| H            | 7.37960200  | -0.33587600 | 1.50385500  | C                          | 0.48719500  | 1.58092400  | -0.09442400 |
| C            | 3.56468200  | -0.89529000 | 0.91526500  | C                          | -0.61528300 | 2.17875200  | 0.04399900  |
| C            | 5.38074900  | 0.33723800  | 1.96279100  | Br                         | 1.34470100  | -1.44579700 | -1.03786800 |
| H            | 5.71301500  | 1.13737200  | 2.61942000  | Si                         | -1.68358700 | 3.64953200  | 0.46226200  |
| C            | 4.01575500  | 0.13611100  | 1.75068500  | C                          | -0.53511500 | 5.07348600  | 0.93916800  |
| H            | 3.29150800  | 0.78118400  | 2.24352700  | H                          | -1.11633500 | 5.96658500  | 1.20415900  |
| H            | 6.59947600  | -2.17217900 | 0.01586500  | H                          | 0.08888300  | 4.81561900  | 1.80352600  |
| C            | 2.07835400  | -1.10023200 | 0.66518000  | H                          | 0.13235000  | 5.34580400  | 0.11252600  |
| C            | 1.60300200  | -0.30688300 | -0.54688700 | C                          | -2.78832400 | 3.17909800  | 1.91737300  |
| H            | 2.07332600  | -0.58493500 | -1.48986100 | H                          | -3.43127400 | 4.02187300  | 2.20299300  |
| H            | 1.49936300  | -0.80678400 | 1.54647100  | H                          | -3.43916400 | 2.33144800  | 1.67318800  |
| H            | 1.87203100  | -2.15604800 | 0.46619600  | H                          | -2.19444400 | 2.90036300  | 2.79636800  |
| C            | 1.17108400  | 1.01702500  | -0.43193400 | C                          | -2.70856000 | 4.10927500  | -1.05183200 |
| C            | 0.34539500  | 1.95725200  | -0.41684400 | H                          | -3.39090000 | 3.30152000  | -1.34000800 |
| Br           | -0.39227100 | -2.74311000 | -1.65143200 | H                          | -3.31453800 | 5.00210400  | -0.84922100 |
| Si           | -0.20422900 | 3.74175400  | -0.39612600 | H                          | -2.06938500 | 4.33005100  | -1.91539500 |
| C            | 1.31845500  | 4.75631500  | 0.06771900  | Pd                         | -1.02985700 | 0.15150900  | -0.71840100 |
| H            | 1.07659700  | 5.82729600  | 0.07717400  | C                          | -2.73705900 | -1.19017700 | -1.19083100 |
| H            | 1.69152200  | 4.48979400  | 1.06380000  | H                          | -2.44594300 | -1.59084100 | -2.16174800 |
| H            | 2.13507500  | 4.60455800  | -0.64793100 | C                          | -3.18419100 | 0.12936100  | -1.15022500 |
| C            | -1.56709300 | 3.97845500  | 0.88581600  | H                          | -3.74680900 | 0.51303000  | -0.30391600 |
| H            | -1.77260100 | 5.04902300  | 1.01710800  | H                          | -3.29832500 | 0.68345000  | -2.07810100 |
| H            | -2.50822000 | 3.50394800  | 0.58480600  | C                          | -2.90620200 | -2.21081200 | -0.13561000 |
| H            | -1.27953500 | 3.57542600  | 1.86413400  | C                          | -2.56067600 | -3.54429200 | -0.42179100 |
| C            | -0.81504200 | 4.18576700  | -2.12316700 | C                          | -3.41812000 | -1.92032600 | 1.14419700  |
| H            | -1.66643700 | 3.56573000  | -2.42800000 | C                          | -2.71856000 | -4.55083300 | 0.53034900  |
| H            | -1.13759200 | 5.23453600  | -2.15936800 | H                          | -2.16445200 | -3.78879000 | -1.40449800 |
| H            | -0.02376100 | 4.05463700  | -2.87098700 | C                          | -3.57586000 | -2.92542900 | 2.09462800  |
| Pd           | -0.55106300 | -0.27311200 | -0.87588900 | H                          | -3.68989400 | -0.90008500 | 1.39920100  |
| C            | -2.91094300 | -0.60926600 | -0.68709400 | C                          | -3.22722700 | -4.24659600 | 1.79413300  |
| H            | -2.98569700 | -1.52719600 | -1.26302100 | H                          | -2.44352600 | -5.57300200 | 0.28347000  |
| C            | -2.67514700 | 0.55277000  | -1.37786500 | H                          | -3.97312700 | -2.67809300 | 3.07590900  |
|              |             |             |             | H                          | -3.35162500 | -5.02840700 | 2.53863800  |

|               |             |             |             |                             |             |             |             |
|---------------|-------------|-------------|-------------|-----------------------------|-------------|-------------|-------------|
| <b>INT10'</b> |             |             |             | C                           | -0.86163600 | -0.29969400 | 0.11486900  |
| C             | 6.43694300  | -1.15452000 | -0.55373100 | C                           | -1.91662600 | -1.09119500 | -0.65649900 |
| C             | 5.23967500  | -0.51038800 | -0.87288800 | H                           | -1.79515800 | -0.97630400 | -1.74034600 |
| C             | 6.41787400  | -2.37154800 | 0.12964700  | H                           | -0.86690200 | -0.52997500 | 1.17960300  |
| H             | 5.26155000  | 0.43903600  | -1.40176600 | H                           | -1.76518600 | -2.15524900 | -0.44216700 |
| H             | 7.34898700  | -2.87382700 | 0.37857000  | C                           | -3.27367000 | -0.69054200 | -0.26822300 |
| C             | 4.00729000  | -1.07173800 | -0.51695000 | C                           | -4.39077600 | -0.33729300 | 0.07031100  |
| C             | 5.19427100  | -2.94299500 | 0.48800600  | Br                          | 1.17017400  | -2.94736300 | 0.20046200  |
| H             | 5.16944200  | -3.89361600 | 1.01451600  | Si                          | -6.08582900 | 0.18726100  | 0.56683700  |
| C             | 4.00016600  | -2.29864800 | 0.16331000  | C                           | -6.10416500 | 0.48648000  | 2.43206200  |
| H             | 3.05124700  | -2.75796400 | 0.43454500  | H                           | -7.10037600 | 0.80223500  | 2.76886600  |
| H             | 7.38396600  | -0.70342100 | -0.83845800 | H                           | -5.83904600 | -0.42144300 | 2.98749200  |
| C             | 2.70485000  | -0.38639500 | -0.86932300 | H                           | -5.39323700 | 1.27043700  | 2.72044100  |
| C             | 1.92662500  | 0.17987800  | 0.33040100  | C                           | -7.30252000 | -1.18333100 | 0.10970600  |
| H             | 1.91248900  | -0.51944900 | 1.16593200  | H                           | -8.32825400 | -0.90435600 | 0.38472500  |
| H             | 2.02326000  | -1.10975200 | -1.33798600 | H                           | -7.29260400 | -1.38726700 | -0.96803300 |
| H             | 2.86387700  | 0.41347000  | -1.59900600 | H                           | -7.06420500 | -2.12103900 | 0.62635500  |
| C             | 0.59122000  | 0.65757500  | 0.00753300  | C                           | -6.52233300 | 1.77887300  | -0.35455500 |
| C             | -0.39853600 | 1.39017700  | -0.22828200 | H                           | -6.50697600 | 1.63116300  | -1.44141900 |
| Br            | 3.01003100  | 1.77682700  | 1.17869400  | H                           | -7.52834400 | 2.12410200  | -0.08166700 |
| Si            | -1.52922600 | 2.85907300  | -0.42040900 | H                           | -5.82027200 | 2.58814800  | -0.11945600 |
| C             | -0.47043200 | 4.41717200  | -0.28239700 | Pd                          | 1.06687800  | -0.50916400 | -0.64209900 |
| H             | -1.09388600 | 5.31784700  | -0.35925500 | C                           | 3.25971600  | 0.36793900  | -1.28419100 |
| H             | 0.05959400  | 4.45668700  | 0.67655500  | H                           | 2.94672400  | 1.27888400  | -1.79327900 |
| H             | 0.28188100  | 4.46258100  | -1.07903400 | C                           | 4.03461300  | 0.59090300  | -0.04901300 |
| C             | -2.81551800 | 2.79264400  | 0.95737500  | C                           | 4.36058200  | 1.91091700  | 0.31056900  |
| H             | -3.49546300 | 3.65259000  | 0.89584700  | C                           | 4.47777500  | -0.45857900 | 0.77865300  |
| H             | -3.42080800 | 1.88052900  | 0.89422000  | C                           | 5.11171900  | 2.17859900  | 1.45444900  |
| H             | -2.34220700 | 2.81204400  | 1.94661500  | H                           | 4.02317800  | 2.73083800  | -0.31936200 |
| C             | -2.35253700 | 2.75855300  | -2.11529600 | C                           | 5.22420400  | -0.18937200 | 1.92248800  |
| H             | -2.96373000 | 1.85269700  | -2.20664600 | H                           | 4.21862800  | -1.48474000 | 0.53842700  |
| H             | -3.00817200 | 3.62365200  | -2.28032800 | C                           | 5.54610800  | 1.12824600  | 2.26522100  |
| H             | -1.60988800 | 2.74416100  | -2.92235900 | H                           | 5.35681700  | 3.20555100  | 1.71225200  |
| Pd            | -1.04015500 | -0.65659300 | -0.50819300 | H                           | 5.55307300  | -1.01124000 | 2.55278000  |
| C             | -2.36932100 | -2.44421600 | -0.26019900 | H                           | 6.12914700  | 1.33242500  | 3.15926800  |
| H             | -1.83547900 | -3.06208600 | 0.46115000  | C                           | 3.02867400  | -0.82434300 | -1.91379400 |
| C             | -1.88098500 | -2.40008400 | -1.55894500 | H                           | 3.43021300  | -1.76442900 | -1.55180400 |
| H             | -2.47509800 | -2.02792000 | -2.39032900 | H                           | 2.59396400  | -0.83925900 | -2.90973000 |
| H             | -1.02786300 | -3.01487700 | -1.83549600 | <b>TS<sup>11'-12'</sup></b> |             |             |             |
| C             | -3.69534900 | -1.97773000 | 0.20455100  | C                           | 2.17435500  | 2.62185500  | 1.54050200  |
| C             | -4.06560300 | -2.21352000 | 1.54100500  | C                           | 0.98794800  | 1.91790500  | 1.55470200  |
| C             | -4.61901500 | -1.32088800 | -0.63152200 | C                           | 2.76384600  | 3.00582900  | 0.31676000  |
| C             | -5.30657300 | -1.80600600 | 2.02897000  | H                           | 0.52441800  | 1.63983200  | 2.49765200  |
| H             | -3.36735700 | -2.72283100 | 2.20142400  | H                           | 3.68719300  | 3.57759200  | 0.31830500  |
| C             | -5.85878900 | -0.91370700 | -0.14393900 | C                           | 0.32333000  | 1.56937500  | 0.33529600  |
| H             | -4.36752600 | -1.12713100 | -1.67029600 | C                           | 2.16689300  | 2.65343500  | -0.88222300 |
| C             | -6.20982600 | -1.15211600 | 1.18877400  | H                           | 2.61144400  | 2.95519600  | -1.82644000 |
| H             | -5.56772900 | -2.00093700 | 3.06589400  | C                           | 0.97051900  | 1.90405500  | -0.90252800 |
| H             | -6.55647000 | -0.40980700 | -0.80800700 | H                           | 0.44262400  | 1.79093800  | -1.84401000 |
| H             | -7.17797100 | -0.83339400 | 1.56539400  | H                           | 2.65127300  | 2.89213300  | 2.47825800  |
| <b>INT11'</b> |             |             |             | C                           | -1.02128800 | 1.02341400  | 0.39424700  |
| C             | 0.35862200  | 3.25211500  | 0.49101800  | C                           | -1.95945100 | 1.15635000  | -0.79032400 |
| C             | -0.07138800 | 1.97542800  | 0.80885000  | H                           | -1.92994900 | 2.22123500  | -1.07727900 |
| C             | 0.37732300  | 3.68152700  | -0.84817900 | H                           | -1.49935500 | 1.11459500  | 1.36203700  |
| H             | -0.08684100 | 1.63962700  | 1.84188200  | H                           | -1.57053700 | 0.60451800  | -1.65403800 |
| H             | 0.70927700  | 4.68791100  | -1.08799000 | C                           | -3.34683400 | 0.78116200  | -0.53124500 |
| C             | -0.53147900 | 1.08480800  | -0.20534300 | C                           | -4.51839900 | 0.50909400  | -0.34131400 |
| C             | -0.02909600 | 2.82260500  | -1.86431400 | Br                          | -1.10575800 | -1.43814300 | 0.86028800  |
| H             | -0.01672200 | 3.15279900  | -2.89898500 | Si                          | -6.28058500 | 0.03548900  | -0.06652000 |
| C             | -0.47731900 | 1.53045400  | -1.55779000 | C                           | -6.92930800 | 0.96780400  | 1.44207500  |
| H             | -0.86152500 | 0.89741100  | -2.35097800 | H                           | -7.97473700 | 0.70102400  | 1.64565200  |
| H             | 0.68381800  | 3.92406500  | 1.28004400  | H                           | -6.34681200 | 0.73349400  | 2.34146700  |
|               |             |             |             | H                           | -6.88890800 | 2.05396300  | 1.29364500  |

|               |             |             |             |    |             |             |             |
|---------------|-------------|-------------|-------------|----|-------------|-------------|-------------|
| C             | -6.36422000 | -1.82800900 | 0.21859800  | C  | -2.54194500 | 0.97923200  | -0.88290100 |
| H             | -7.40017800 | -2.15500700 | 0.37868700  | H  | -2.47487500 | 2.02692800  | -1.21410500 |
| H             | -5.97011600 | -2.38108600 | -0.64256200 | H  | -2.16029400 | 1.28039400  | 1.23385600  |
| H             | -5.78074800 | -2.12783900 | 1.09737500  | H  | -2.13212600 | 0.37198000  | -1.69822200 |
| C             | -7.27050000 | 0.51012100  | -1.60512200 | C  | -3.94472600 | 0.63585600  | -0.66137900 |
| H             | -6.89892700 | -0.00846400 | -2.49732200 | C  | -5.11988300 | 0.36995400  | -0.48211400 |
| H             | -8.32899500 | 0.24441100  | -1.48440000 | Br | -1.54579100 | -1.16778000 | 0.90857700  |
| H             | -7.22156500 | 1.58804800  | -1.80249900 | Si | -6.89072900 | -0.06658300 | -0.20745700 |
| Pd            | 1.16875000  | -0.41912200 | -0.46121800 | C  | -7.27046100 | 0.09456500  | 1.63561600  |
| C             | 3.07613300  | -1.11868300 | -1.43260100 | H  | -8.31787500 | -0.16317300 | 1.84066000  |
| H             | 3.08845800  | -0.62810600 | -2.40457400 | H  | -6.64004400 | -0.57400400 | 2.23435500  |
| C             | 4.25724400  | -0.82628200 | -0.59105500 | H  | -7.10431500 | 1.11814100  | 1.99327100  |
| C             | 5.21647700  | 0.08925500  | -1.06103300 | C  | -7.17084500 | -1.84273600 | -0.78395000 |
| C             | 4.49071200  | -1.44309400 | 0.65407100  | H  | -8.21655400 | -2.14169000 | -0.63306000 |
| C             | 6.36515900  | 0.37769500  | -0.32333800 | H  | -6.94200400 | -1.95995900 | -1.85024100 |
| H             | 5.05892800  | 0.57323400  | -2.02259800 | H  | -6.53930900 | -2.54730700 | -0.22935800 |
| C             | 5.63681000  | -1.15521100 | 1.39042100  | C  | -7.96704700 | 1.12406600  | -1.20428800 |
| H             | 3.76702900  | -2.14831700 | 1.05225000  | H  | -7.75100000 | 1.05918200  | -2.27773700 |
| C             | 6.58215000  | -0.24380000 | 0.90725700  | H  | -9.03170600 | 0.89417600  | -1.06553800 |
| H             | 7.09188000  | 1.08595900  | -0.71364600 | H  | -7.80924300 | 2.16463900  | -0.89523900 |
| H             | 5.79482100  | -1.64573500 | 2.34775200  | Pd | 1.95009700  | -0.48794200 | -0.35504800 |
| H             | 7.47620700  | -0.02333900 | 1.48445200  | C  | 3.84093400  | -1.64220100 | -0.67666500 |
| C             | 2.17250400  | -2.16574100 | -1.25295700 | H  | 3.80464000  | -1.89905700 | -1.73507100 |
| H             | 2.28082400  | -2.88424900 | -0.44383100 | C  | 5.03649200  | -0.86089200 | -0.28915500 |
| H             | 1.55847500  | -2.49540000 | -2.08822500 | C  | 5.91992800  | -0.42844700 | -1.29477800 |
| <b>INT12'</b> |             |             |             | C  | 5.35457700  | -0.54720200 | 1.04666000  |
| C             | 1.47957000  | 2.85844700  | 1.12810000  | C  | 7.07326600  | 0.29255800  | -0.98434900 |
| C             | 0.22233500  | 2.24534100  | 1.24241300  | H  | 5.69643500  | -0.66576100 | -2.33281600 |
| C             | 2.26263300  | 2.63795200  | 0.00293100  | C  | 6.50669500  | 0.16992700  | 1.35734400  |
| H             | -0.38342700 | 2.42423500  | 2.12733800  | H  | 4.68964500  | -0.85984200 | 1.84648600  |
| H             | 3.23285500  | 3.11658500  | -0.09468700 | C  | 7.37326900  | 0.59618200  | 0.34455600  |
| C             | -0.27514000 | 1.42310000  | 0.22989100  | H  | 7.73872400  | 0.61353500  | -1.78189700 |
| C             | 1.79033800  | 1.80993900  | -1.03865900 | H  | 6.73097600  | 0.39926900  | 2.39617000  |
| H             | 2.34083100  | 1.75601100  | -1.97273000 | H  | 8.27123900  | 1.15638400  | 0.59129100  |
| C             | 0.51969300  | 1.19603200  | -0.93203000 | C  | 2.97550600  | -2.32166600 | 0.17811200  |
| H             | 0.08351100  | 0.71413300  | -1.80312300 | H  | 3.13293000  | -2.34618000 | 1.25426500  |
| H             | 1.83552500  | 3.50614300  | 1.92418600  | H  | 2.34978700  | -3.11851200 | -0.22003100 |
| C             | -1.65450100 | 0.86391800  | 0.36438000  |    |             |             |             |

## 11. References

- (1) (a) M. A. Mercadante, C. B. Kelly, C. Lee and N. E. Leadbeater, *Org. Process Res. Dev.*, 2012, **16**, 1064–1068; (b) H. Lebel and V. Paquet, *Organometallics*, 2004, **23**, 1187–1190.
- (2) J. S. Marcum, T. N. Cervarich, R. S. Manan, C. C. Roberts and S. J. Meek, *ACS Catal.*, 2019, **9**, 5881–5889.
- (3) S. J. Plamondon, J. M. Warnica, D. Kaldre and J. L. Gleason, *Angew. Chem. Int. Ed.*, 2020, **59**, 253–258.
- (4) C.-Y. Huang and A. G. Doyle, *J. Am. Chem. Soc.*, 2012, **134**, 9541–9544.
- (5) S. KC, R. K. Dhungana, B. Shrestha, S. Thapa, N. Khanal, P. Basnet, R. W. Lebrun and R. Giri, *J. Am. Chem. Soc.*, 2018, **140**, 9801–9805.
- (6) (a) I. Larrosa, M. Simonetti, D. M. Cannas, EU Patent 215426 A1, November 14, 2019; (b) D. Chen, L. Xu, T. Long, S. Zhu, J. Yang and L. Chu, *Chem. Sci.*, 2018, **9**, 9012–9017.
- (7) X. Huang, J. Lin, T. Shen, K. Harms, M. Marchini, P. Ceroni and E. Meggers, *Angew. Chem. Int. Ed.*, 2018, **57**, 5454–5458.
- (8) T. Narasimhaswamy, S. C. Sumathi and B. S. R. Reddy, *Macromolecules*, 1992, **25**, 3338–3344.
- (9) F. Scheidt, C. Thiehoff, G. Yilmaz, S. Meyer, C. G. Daniliuc, G. Kehr and R. Gilmour, *Beilstein J. Org. Chem.*, 2018, **14**, 1021–1027.
- (10) T. R. Puleo, A. J. Strong and J. S. Bandar, *J. Am. Chem. Soc.*, 2019, **141**, 1467–1472.
- (11) R. Plamont, L. V. Graux and H. Clavier, *Eur. J. Org. Chem.*, 2018, 1372–1376.
- (12) S. Rej and N. Chatani, *Chem. Commun.*, 2019, **55**, 10503–10506.
- (13) W. Lu and Z. Shen, *Org. Lett.*, 2019, **21**, 142–146.
- (14) L. Zhao, B. Xu, U. Ablidik, W. Lu, M. Ahmed, M. M. Evseev, E. K. Bashkurov, V. N. Azyazov, A. H. Howlader, S. F. Wnuk, A. M. Mebel and R. I. Kaiser, *ChemPhysChem*, 2019, **20**, 791–797.
- (15) This compound was prepared by Wittig reaction of phenanthrene-9-carbaldehyde with iodomethylenetriphenylphosphorane: J. J. Mousseau, J. A. Bull, C. L. Ladd, A. Fortier, D. Sustac Roman and A. B. Charette, *J. Org. Chem.*, 2011, **76**, 8243–8261.
- (16) T. Ukai, H. Kawazura, Y. Ishii, J. J. Bonnet and J. A. Ibers, *J. Organomet. Chem.*, 1974, **65**, 253–266.
- (17) M. J. Hilton, L.-P. Xu, P.-O. Norrby, Y.-D. Wu, O. Wiest and M. S. Sigman, *J. Org. Chem.*, 2014, **79**, 11841–11850.
- (18) M. J. Frisch, G. W. Trucks, H. B. Schlegel, G. E. Scuseria, M. A. Robb, J. R. Cheeseman, G. Scalmani, V. Barone, G. A. Petersson, H. Nakatsuji, X. Li, M. Caricato, A. V. Marenich, J. Bloino, B. G. Janesko, R. Gomperts, B. Mennucci, H. P. Hratchian, J. V. Ortiz, A. F. Izmaylov, J. L. Sonnenberg, D. Williams-

- Young, F. Ding, F. Lipparini, F. Egidi, J. Goings, B. Peng, A. Petrone, T. Henderson, D. Ranasinghe, V. G. Zakrzewski, J. Gao, N. Rega, G. Zheng, W. Liang, M. Hada, M. Ehara, K. Toyota, R. Fukuda, J. Hasegawa, M. Ishida, T. Nakajima, Y. Honda, O. Kitao, H. Nakai, T. Vreven, K. Throssell, J. A. Montgomery, Jr., J. E. Peralta, F. Ogliaro, M. J. Bearpark, J. J. Heyd, E. N. Brothers, K. N. Kudin, V. N. Staroverov, T. A. Keith, R. Kobayashi, J. Normand, K. Raghavachari, A. P. Rendell, J. C. Burant, S. S. Iyengar, J. Tomasi, M. Cossi, J. M. Millam, M. Klene, C. Adamo, R. Cammi, J. W. Ochterski, R. L. Martin, K. Morokuma, O. Farkas, J. B. Foresman and D. J. Fox, *Gaussian 16 (Revision C.01)*, Gaussian, Inc., Wallingford CT, 2019.
- (19) M. J. Frisch, G. W. Trucks, H. B. Schlegel, G. E. Scuseria, M. A. Robb, J. R. Cheeseman, G. Scalmani, V. Barone, B. Mennucci, G. A. Petersson, H. Nakatsuji, M. Caricato, X. Li, H. P. Hratchian, A. F. Izmaylov, J. Bloino, G. Zheng, J. L. Sonnenberg, M. Hada, M. Ehara, K. Toyota, R. Fukuda, J. Hasegawa, M. Ishida, T. Nakajima, Y. Honda, O. Kitao, H. Nakai, T. Vreven, J. A. Montgomery, Jr., J. E. Peralta, F. Ogliaro, M. Bearpark, J. J. Heyd, E. Brothers, K. N. Kudin, V. N. Staroverov, T. Keith, R. Kobayashi, J. Normand, K. Raghavachari, A. Rendell, J. C. Burant, S. S. Iyengar, J. Tomasi, M. Cossi, N. Rega, J. M. Millam, M. Klene, J. E. Knox, J. B. Cross, V. Bakken, C. Adamo, J. Jaramillo, R. Gomperts, R. E. Stratmann, O. Yazyev, A. J. Austin, R. Cammi, C. Pomelli, J. W. Ochterski, R. L. Martin, K. Morokuma, V. G. Zakrzewski, G. A. Voth, P. Salvador, J. J. Dannenberg, S. Dapprich, A. D. Daniels, O. Farkas, J. B. Foresman, J. V. Ortiz, J. Cioslowski and D. J. Fox, *Gaussian 09 (Revision D.01)*, Gaussian, Inc., Wallingford CT, 2013.
- (20) (a) C. Lee, W. Yang and R. G. Parr, *Phys. Rev. B*, 1988, **37**, 785–789; (b) A. D. Becke, *J. Chem. Phys.*, 1993, **98**, 5648–5652.
- (21) (a) P. J. Hay and W. R. Wadt, *J. Chem. Phys.*, 1985, **82**, 270–283; (b) W. R. Wadt and P. J. Hay, *J. Chem. Phys.*, 1985, **82**, 284–298; (c) P. J. Hay and W. R. Wadt, *J. Chem. Phys.*, 1985, **82**, 299–310.
- (22) (a) R. Ditchfield, W. J. Hehre and J. A. Pople, *J. Chem. Phys.*, 1971, **54**, 724–728; (b) M. M. Francl, W. J. Pietro, W. J. Hehre, J. S. Binkley, M. S. Gordon, D. J. DeFrees and J. A. Pople, *J. Chem. Phys.*, 1982, **77**, 3654–3665.
- (23) (a) B. Mennucci and J. Tomasi, *J. Chem. Phys.*, 1997, **106**, 5151–5158; (b) K. Fukui, *Acc. Chem. Res.*, 1981, **14**, 363–368; (c) K. Fukui, *J. Phys. Chem.* 1970, **74**, 4161–4163.
- (24) Y. Zhao and D. G. Truhlar, *J. Chem. Phys.*, 2006, **125**, 194101.
- (25) (a) F. Weigend and R. Ahlrichs, *Phys. Chem. Chem. Phys.*, 2005, **7**, 3297–3305; (b) F. Weigend, *Phys. Chem. Chem. Phys.*, 2006, **8**, 1057–1065.
- (26) A. V. Marenich, C. J. Cramer and D. G. Truhlar, *J. Phys. Chem. B*, 2009, **113**, 6378–6396.
- (27) E. D. Glendening, A. E. Reed, J. E. Carpenter, F. Weinhold, NBO version 3.1.

### 13. Copies of $^1\text{H}$ , $^{13}\text{C}$ , $^{11}\text{B}$ , and $^{19}\text{F}$ NMR Spectra

$^1\text{H}$  NMR (400 MHz,  $\text{CDCl}_3$ )

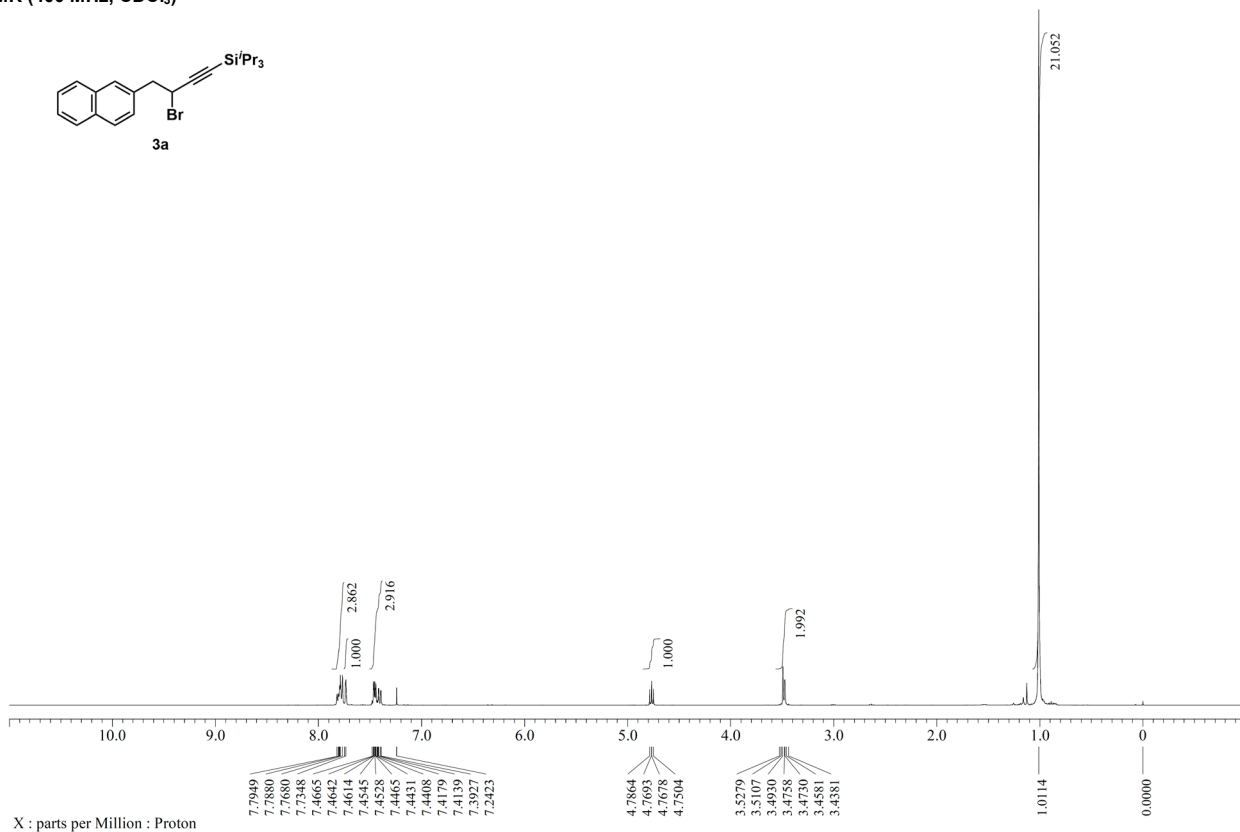

$^{13}\text{C}$  NMR (101 MHz,  $\text{CDCl}_3$ )

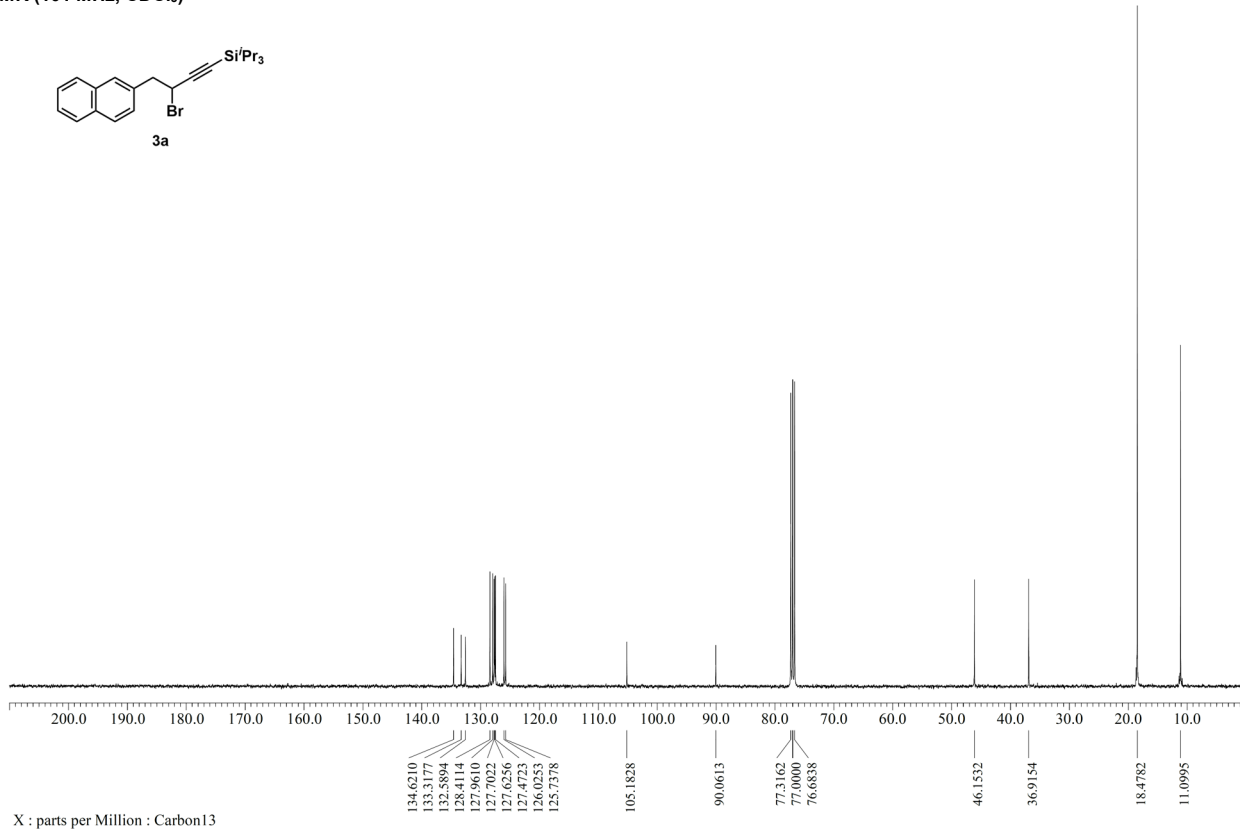



<sup>1</sup>H NMR (400 MHz, CDCl<sub>3</sub>)

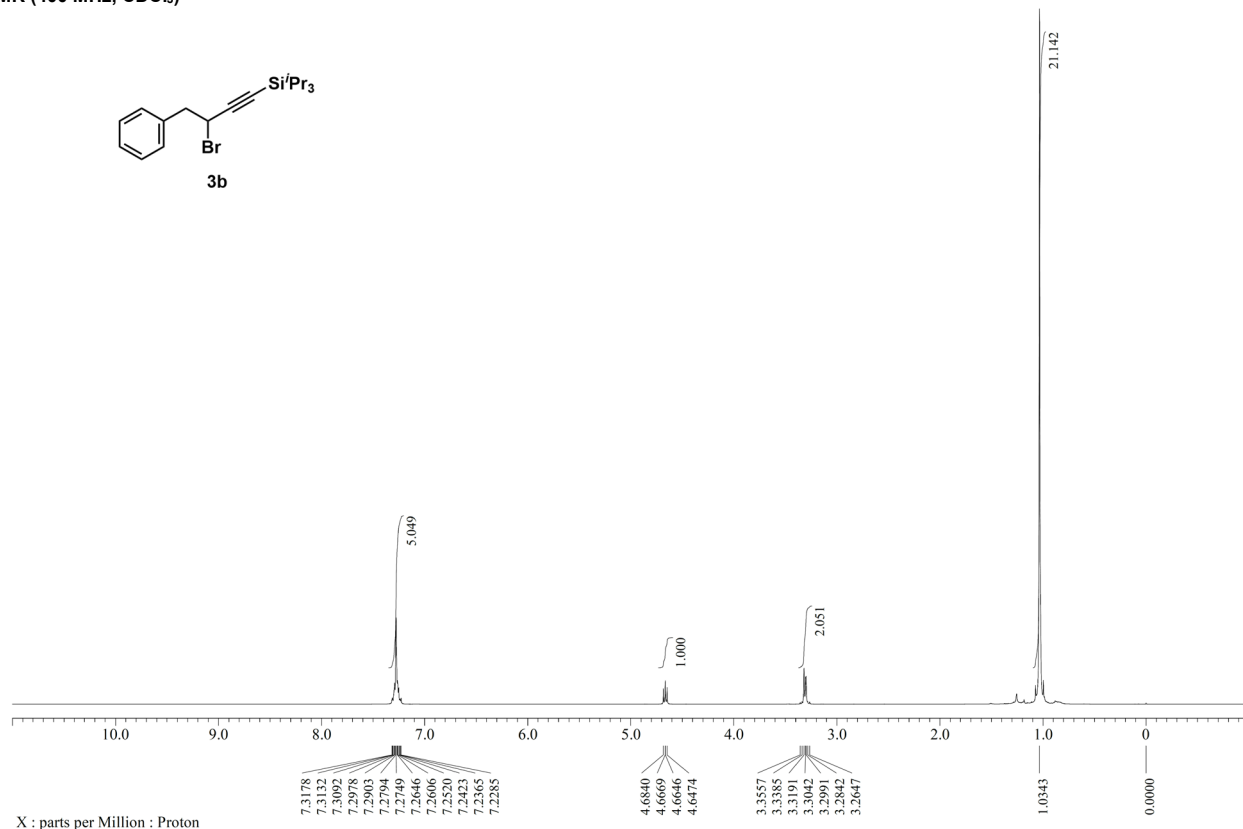

<sup>13</sup>C NMR (101 MHz, CDCl<sub>3</sub>)

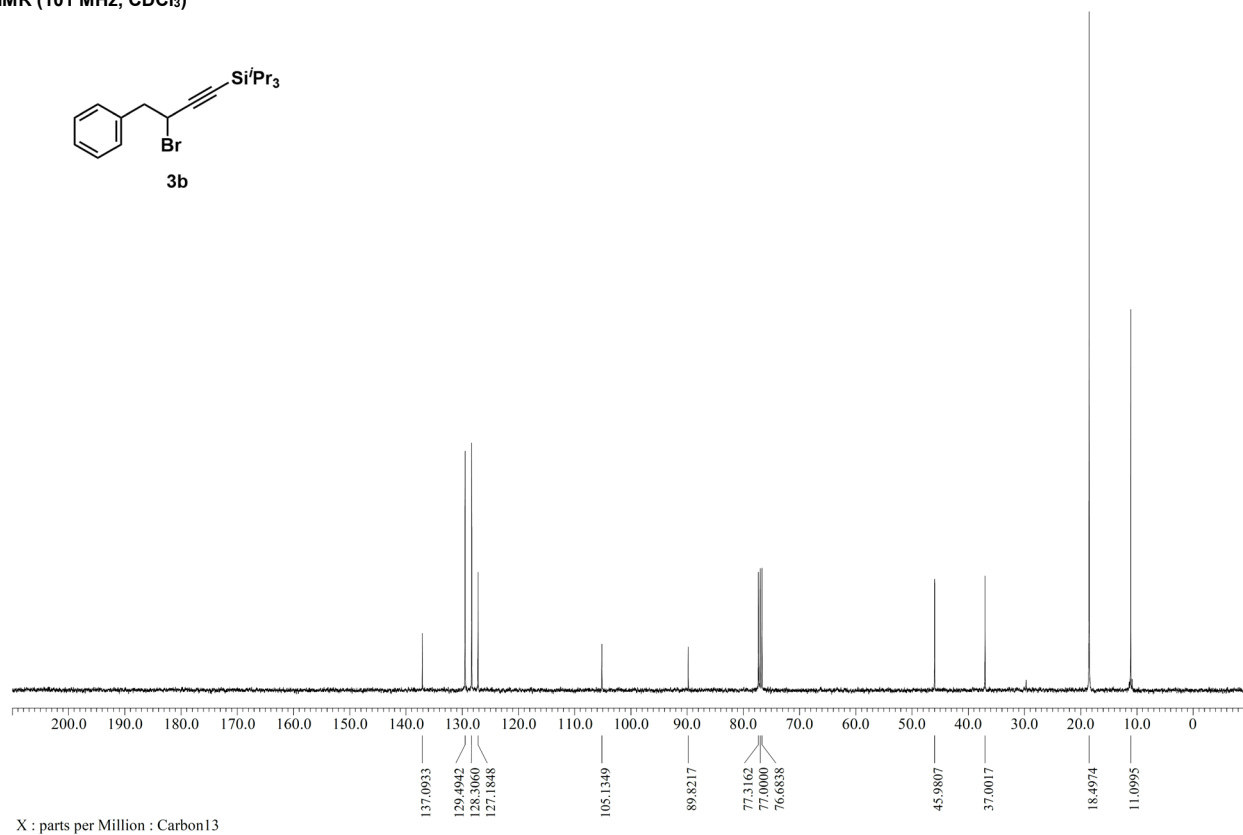

<sup>1</sup>H NMR (400 MHz, CDCl<sub>3</sub>)

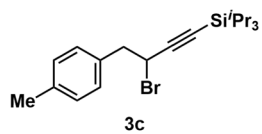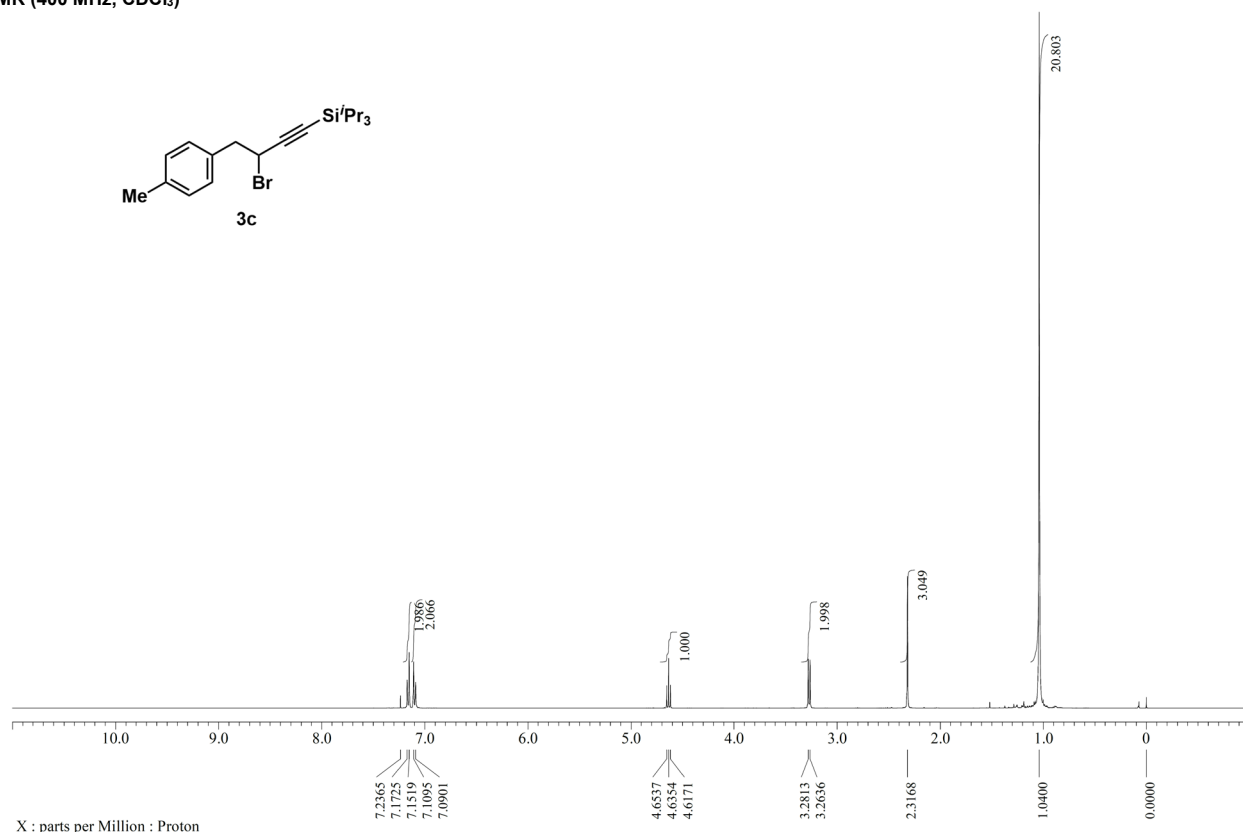

<sup>13</sup>C NMR (101 MHz, CDCl<sub>3</sub>)

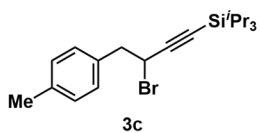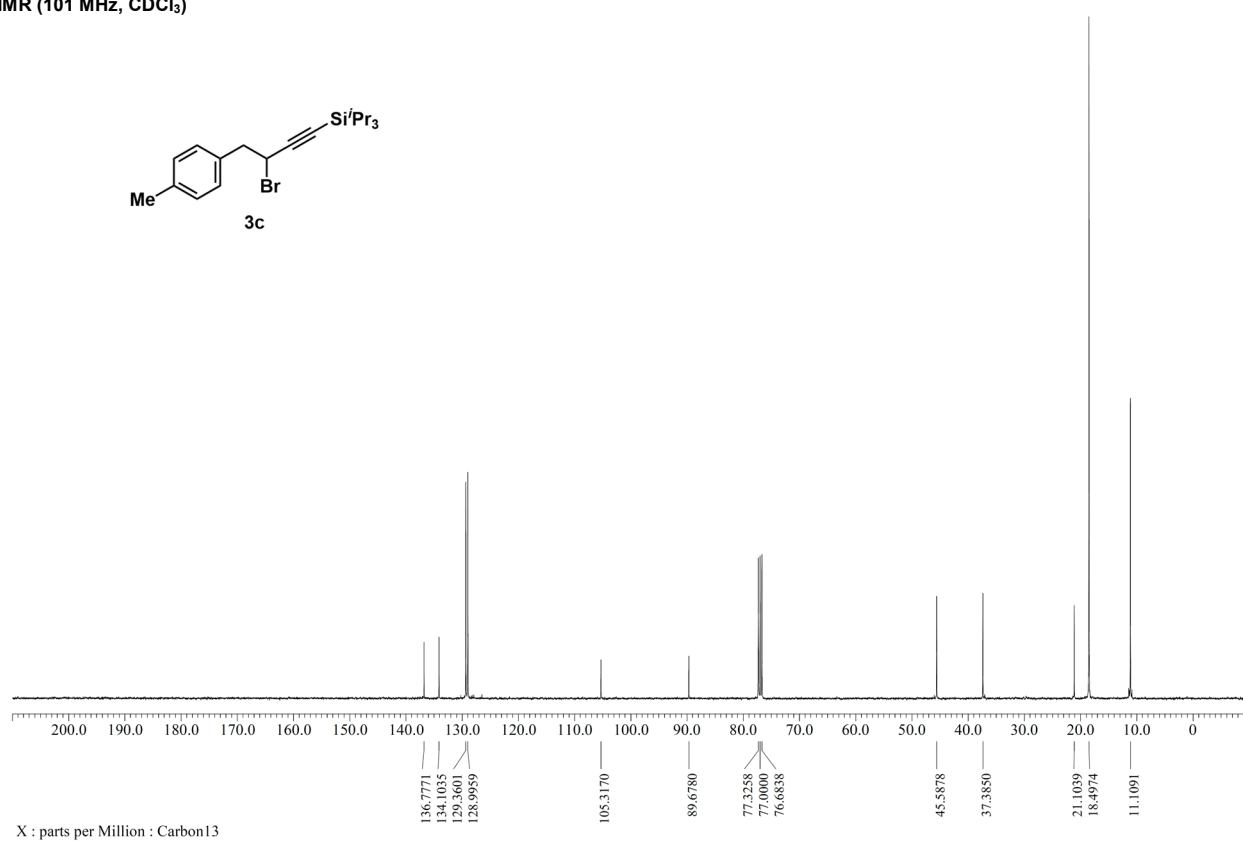

<sup>1</sup>H NMR (400 MHz, CDCl<sub>3</sub>)

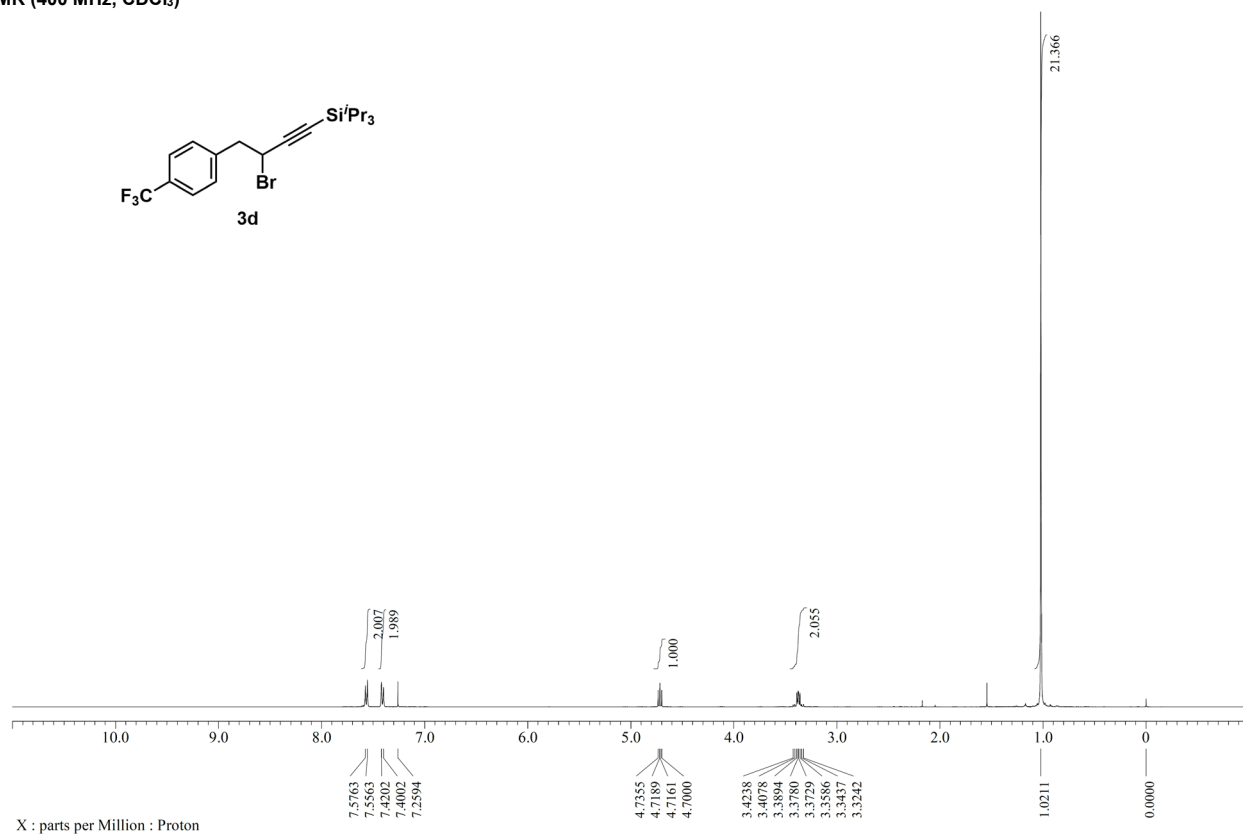

<sup>13</sup>C NMR (101 MHz, CDCl<sub>3</sub>)

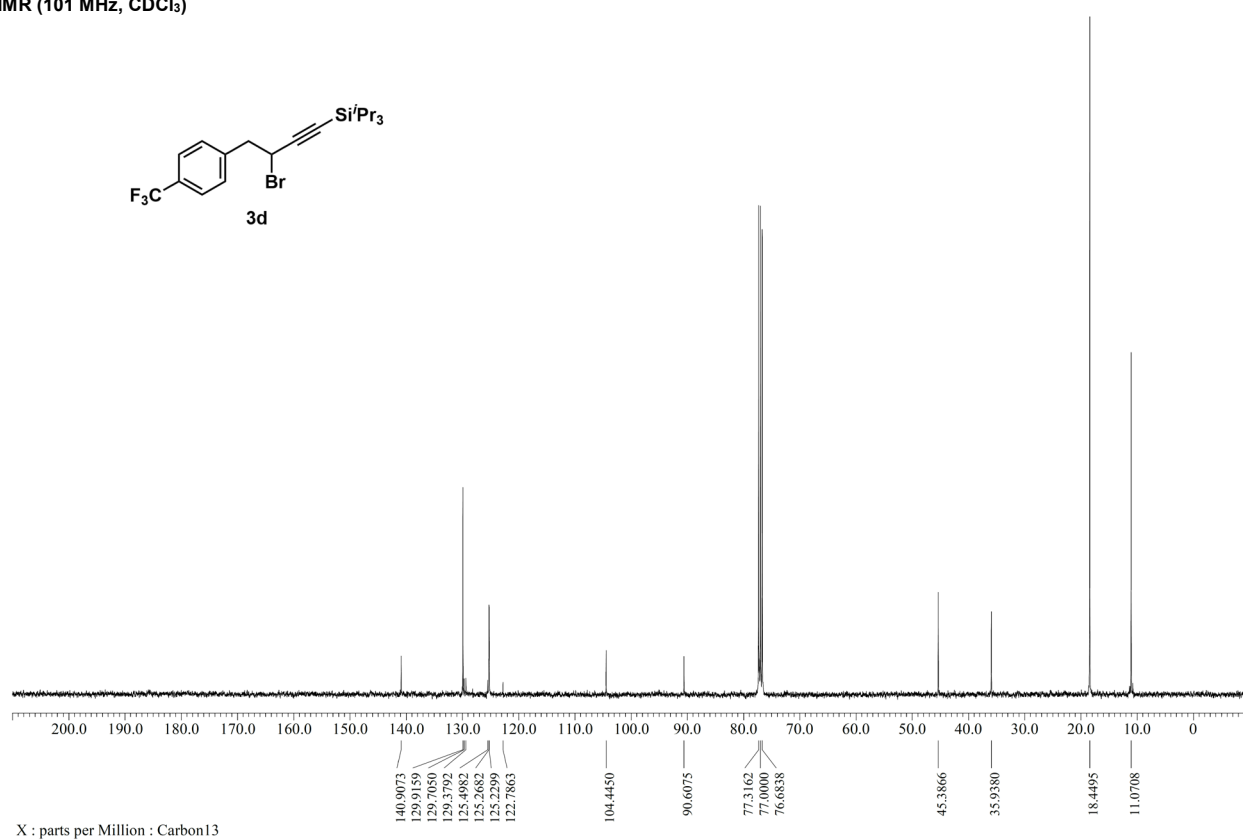

<sup>19</sup>F NMR (376 MHz, CDCl<sub>3</sub>)

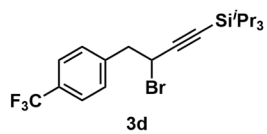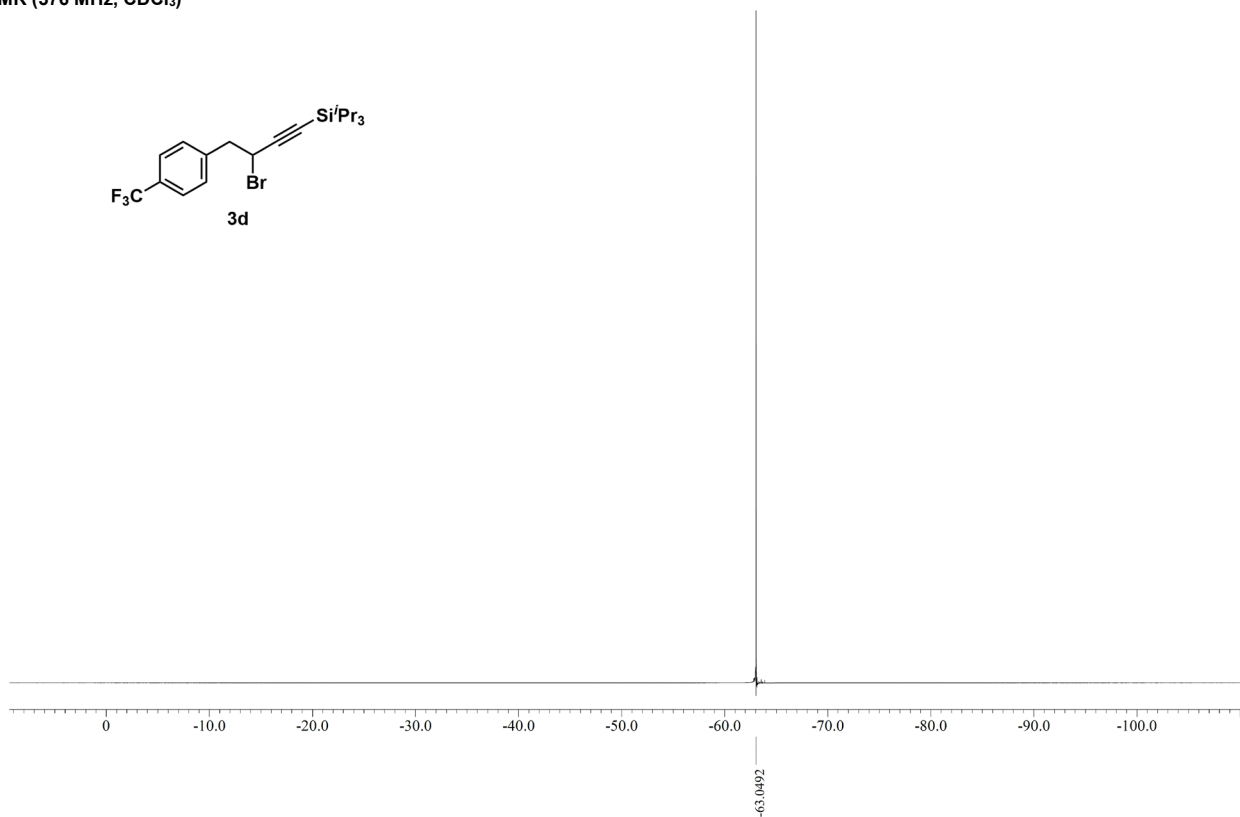

X : parts per Million : Fluorine19

<sup>1</sup>H NMR (400 MHz, CDCl<sub>3</sub>)

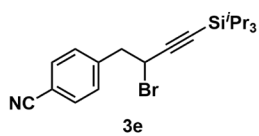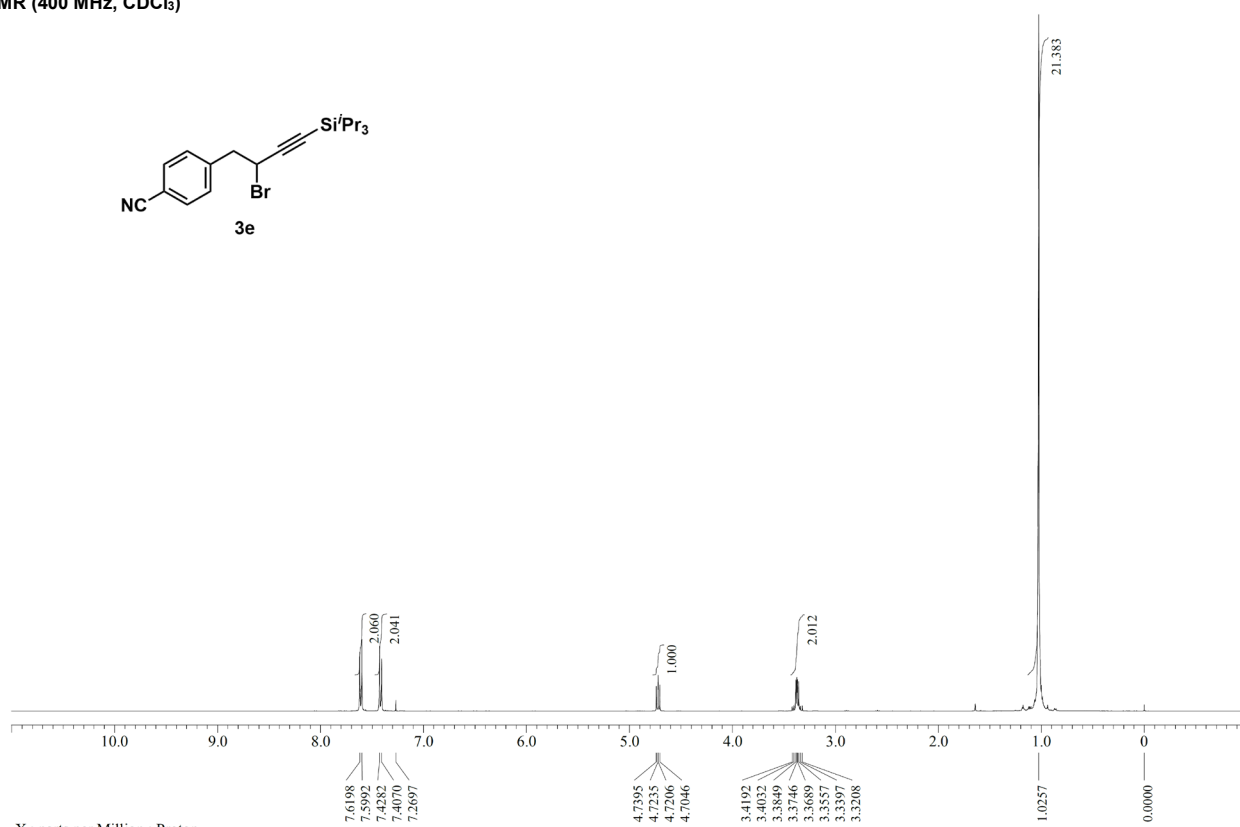

X : parts per Million : Proton

<sup>13</sup>C NMR (101 MHz, CDCl<sub>3</sub>)

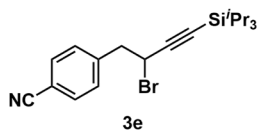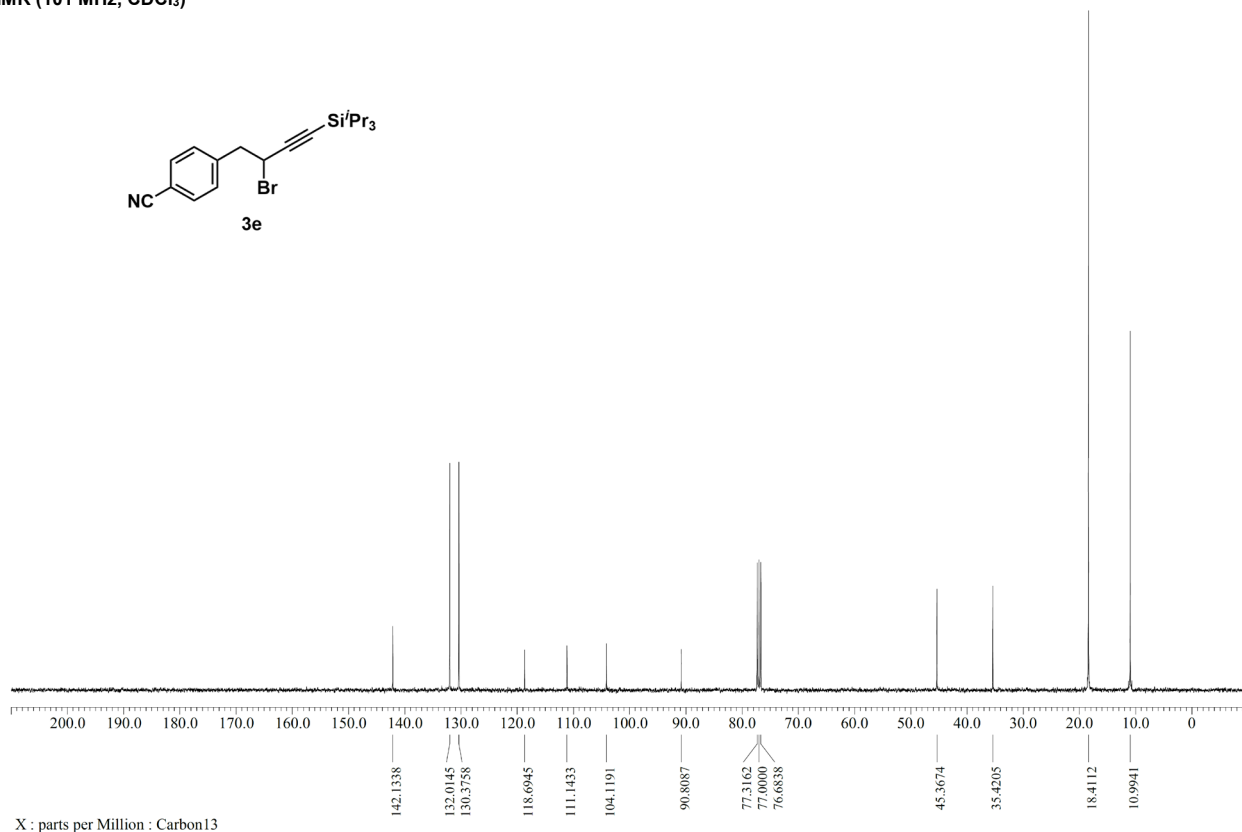

<sup>1</sup>H NMR (400 MHz, CDCl<sub>3</sub>)

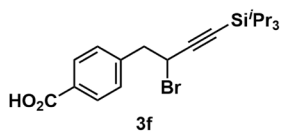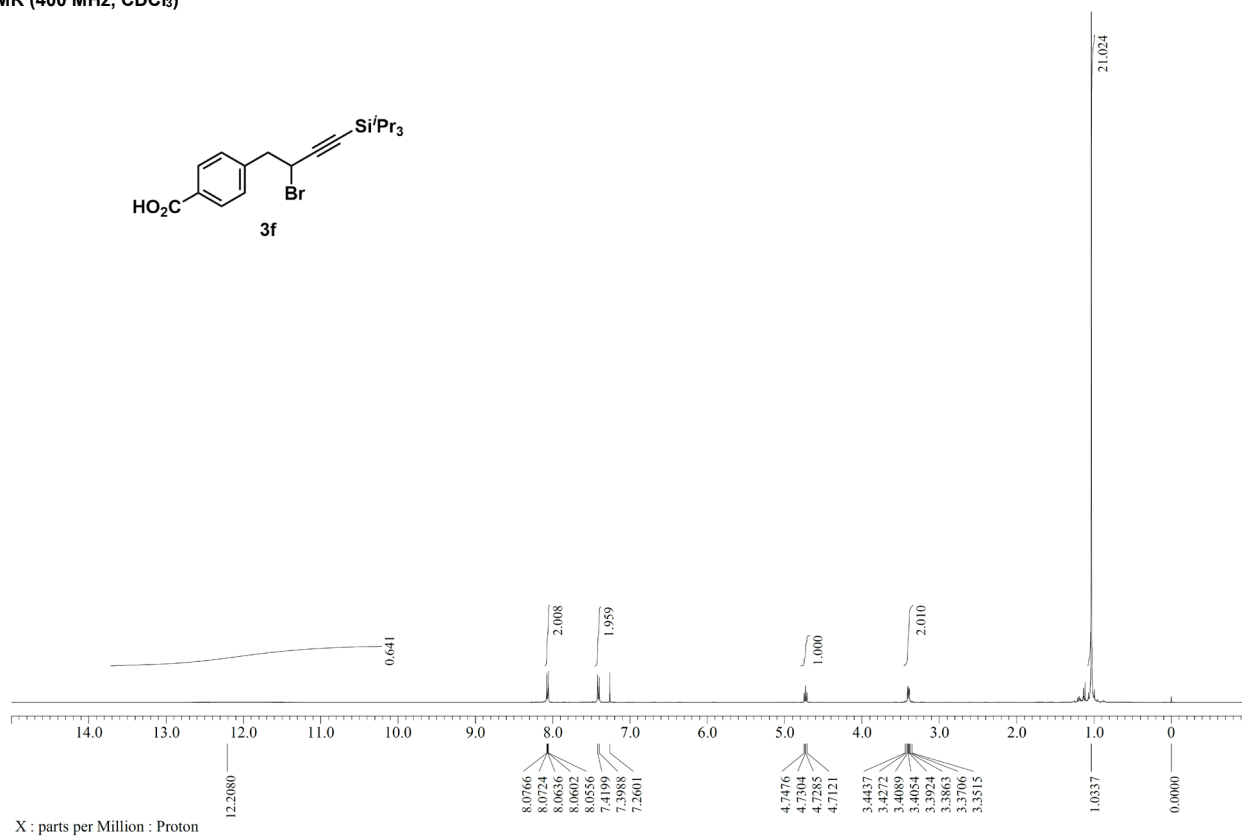

<sup>13</sup>C NMR (101 MHz, CDCl<sub>3</sub>)

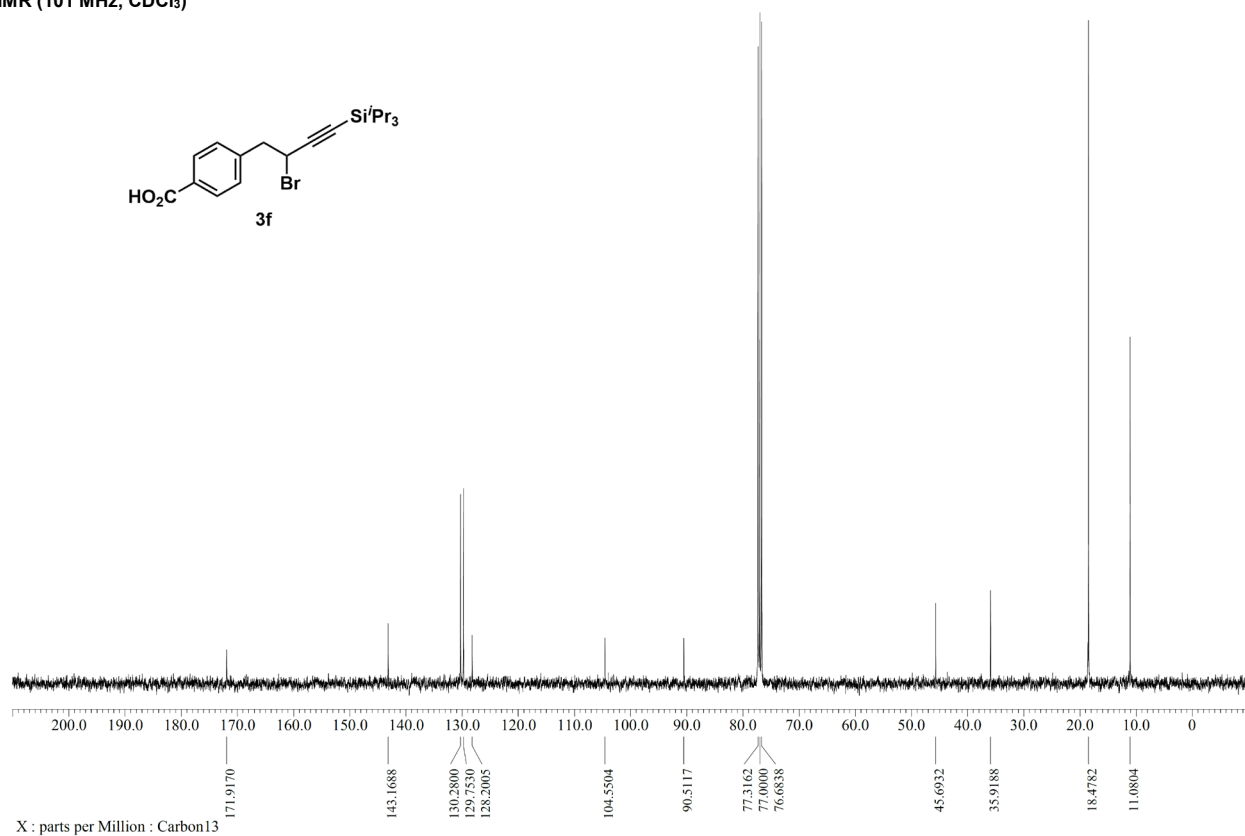

<sup>1</sup>H NMR (400 MHz, CDCl<sub>3</sub>)

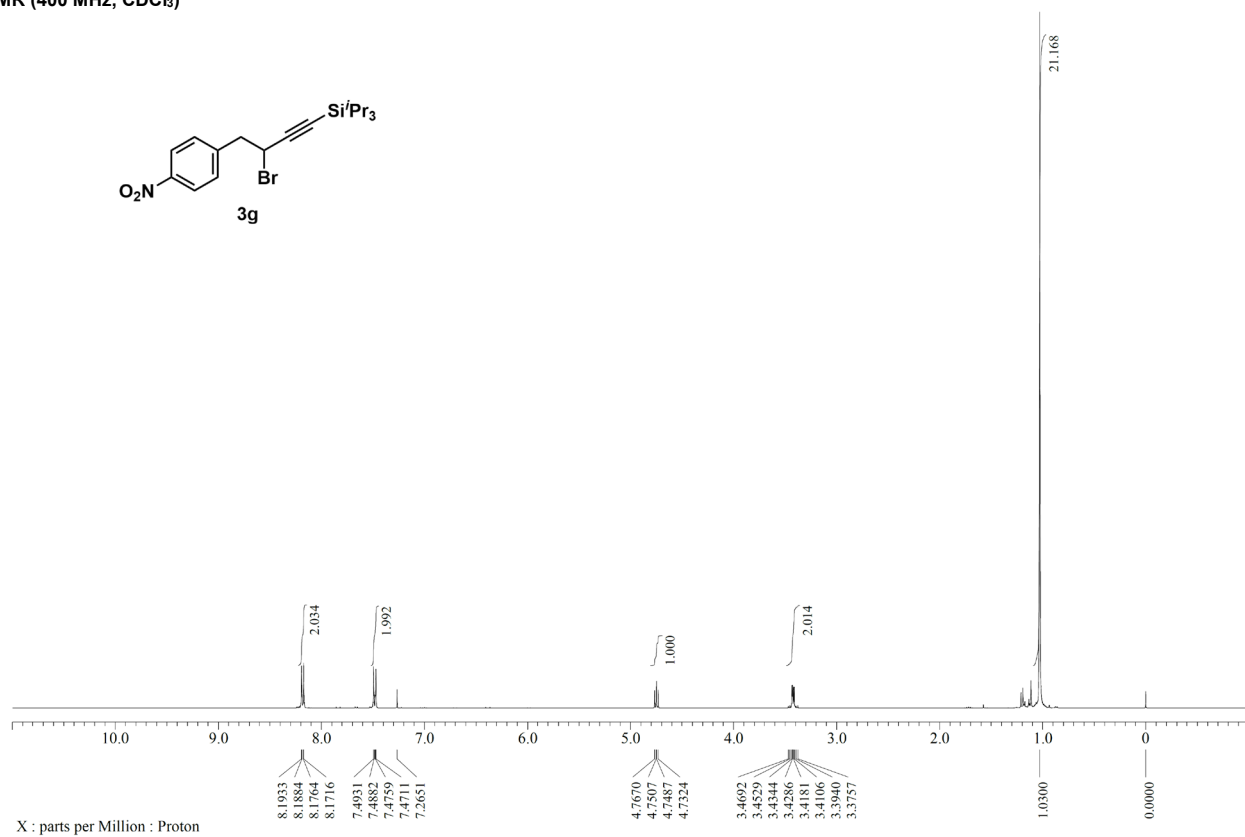

<sup>13</sup>C NMR (101 MHz, CDCl<sub>3</sub>)

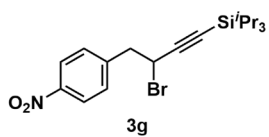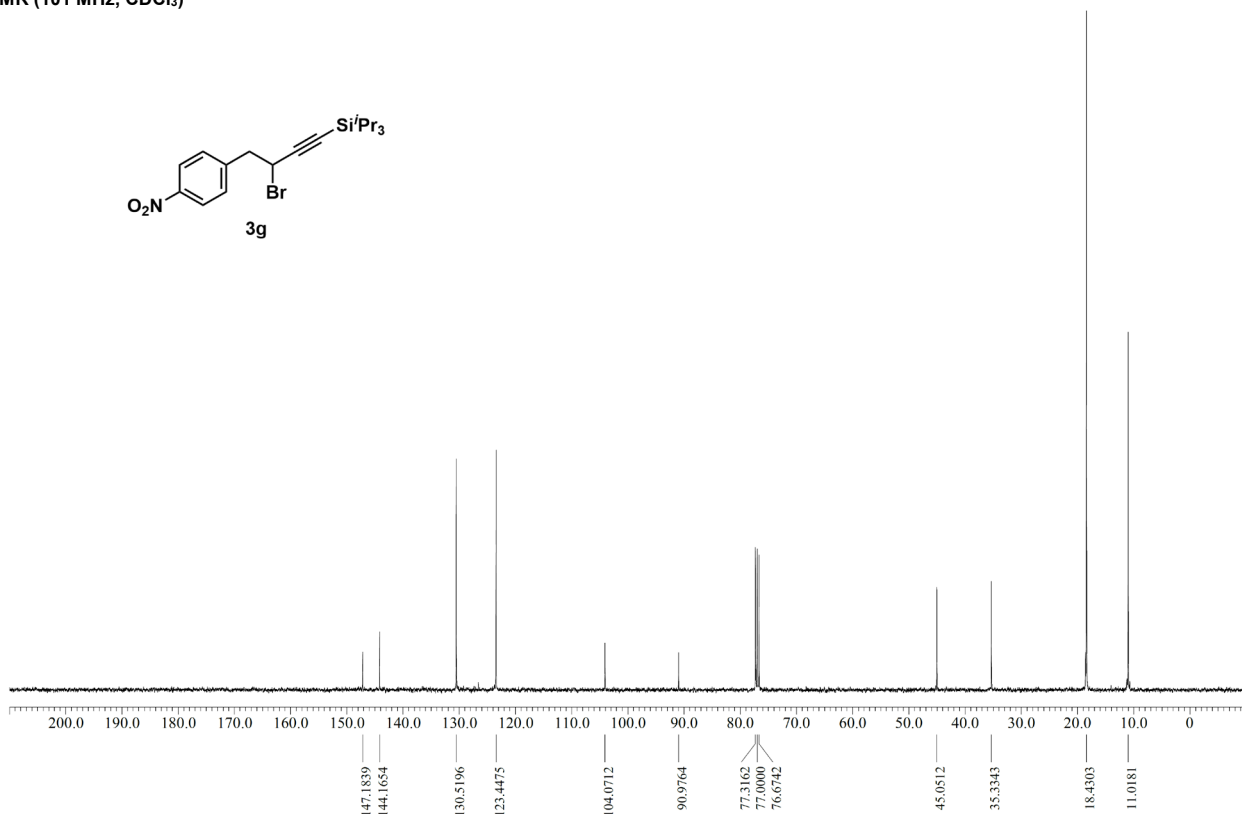

<sup>1</sup>H NMR (400 MHz, CDCl<sub>3</sub>)

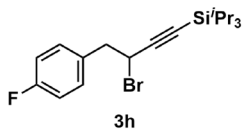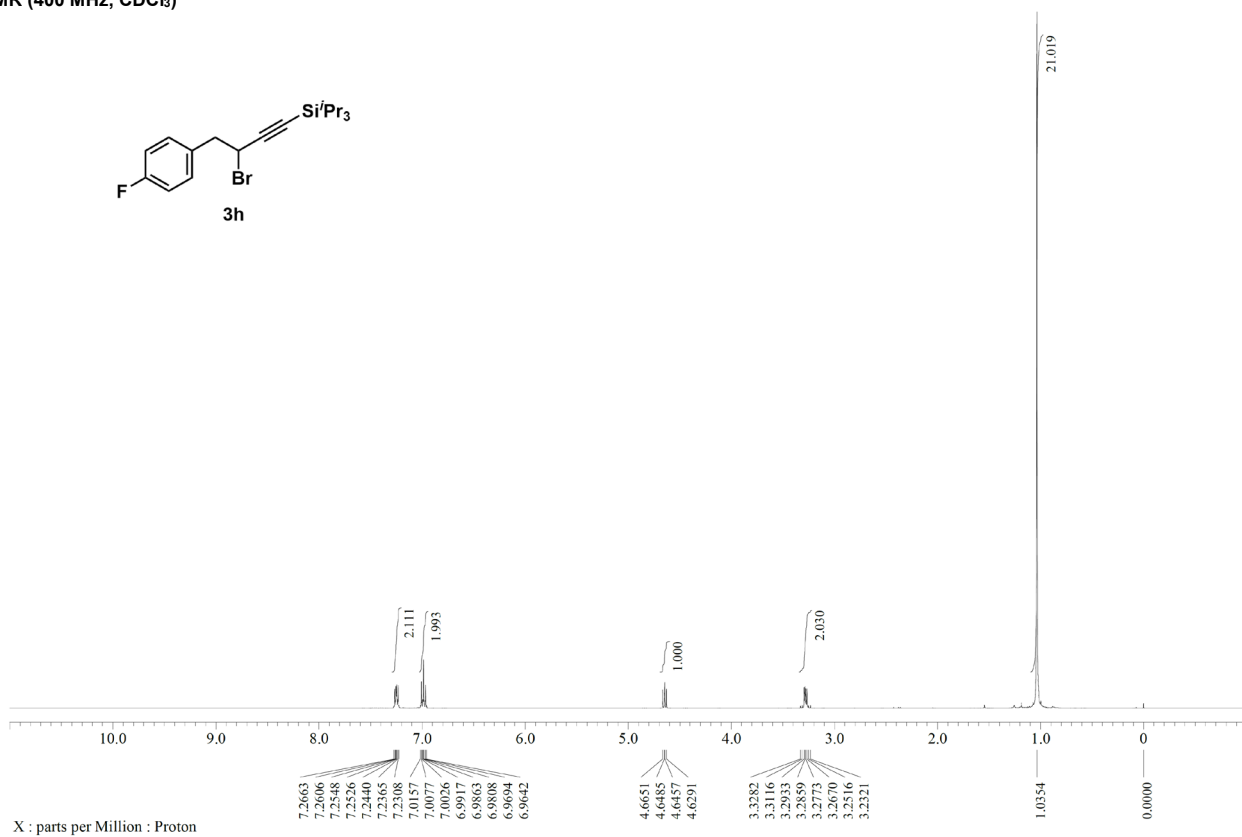

<sup>13</sup>C NMR (101 MHz, CDCl<sub>3</sub>)

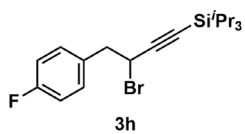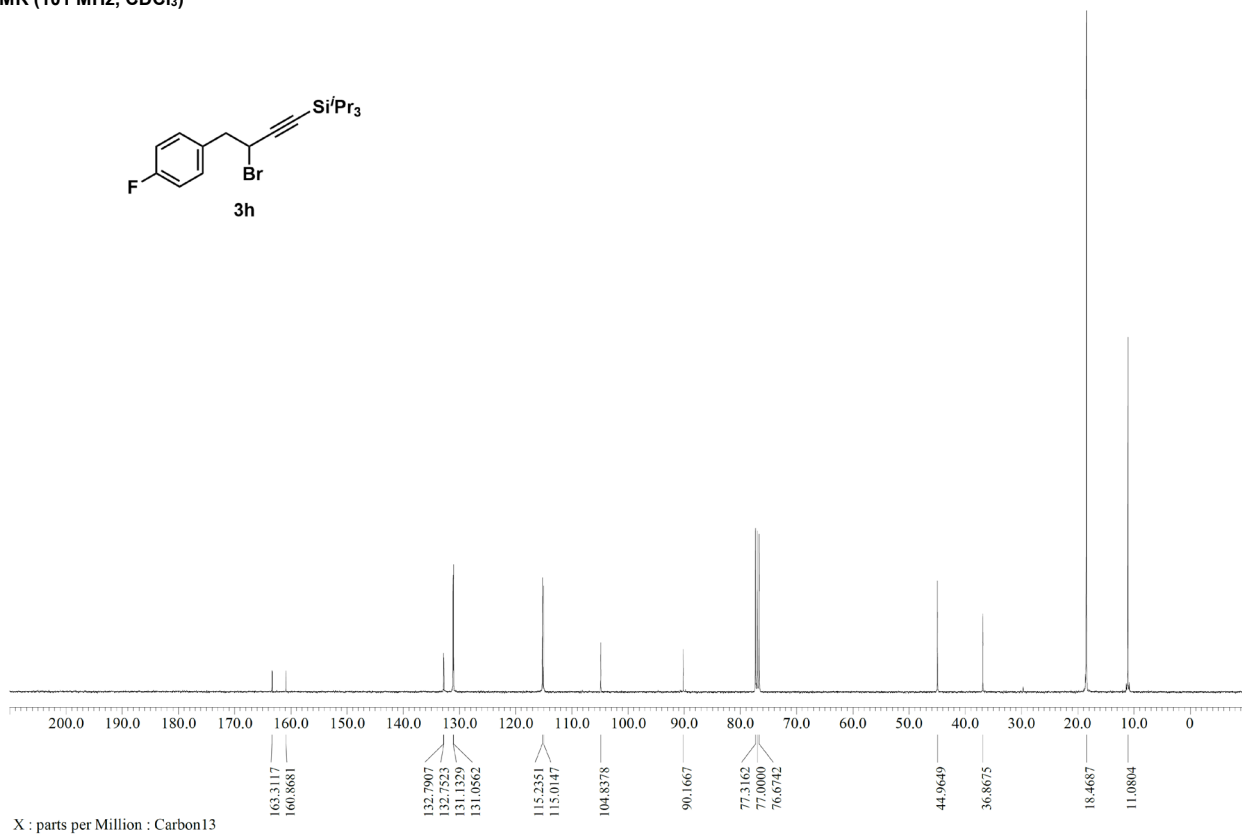

<sup>19</sup>F NMR (376 MHz, CDCl<sub>3</sub>)

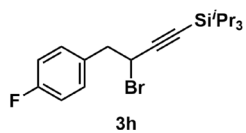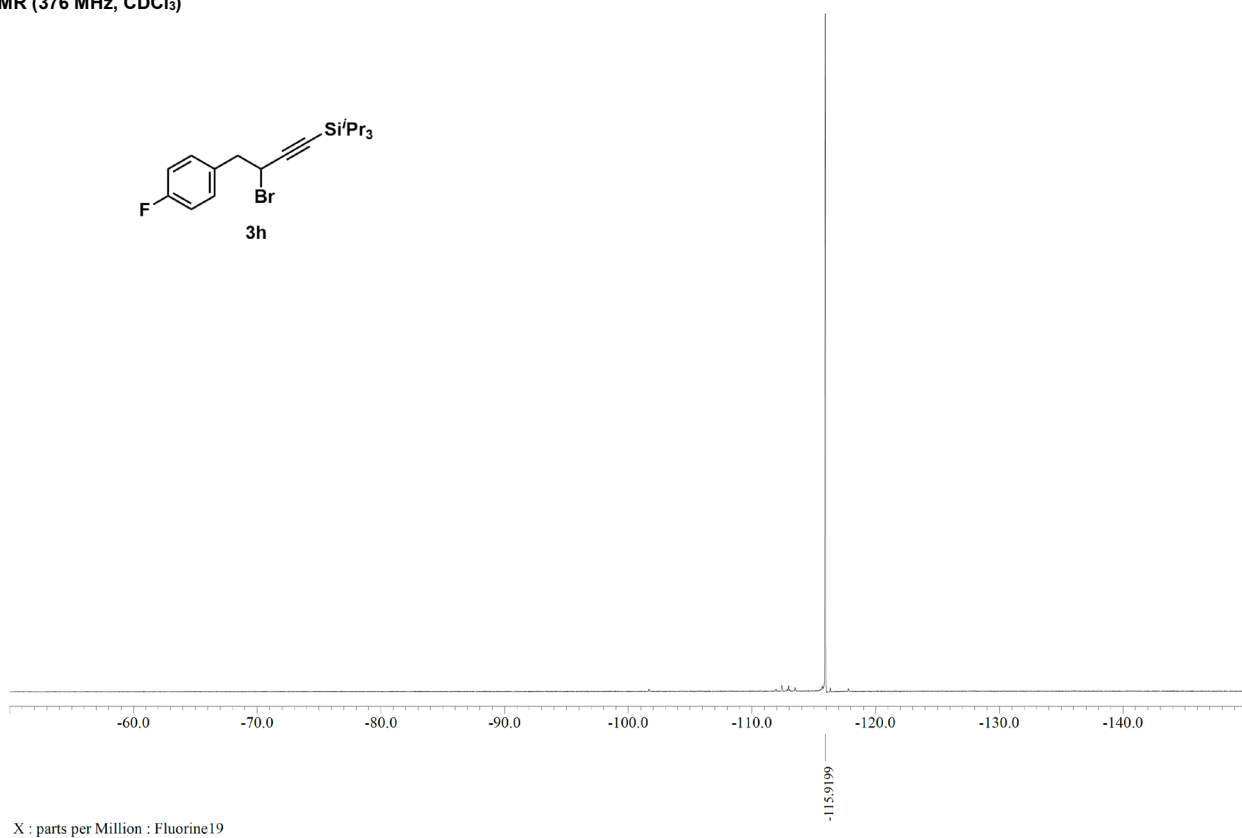



<sup>1</sup>H NMR (400 MHz, CDCl<sub>3</sub>)

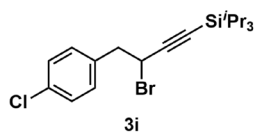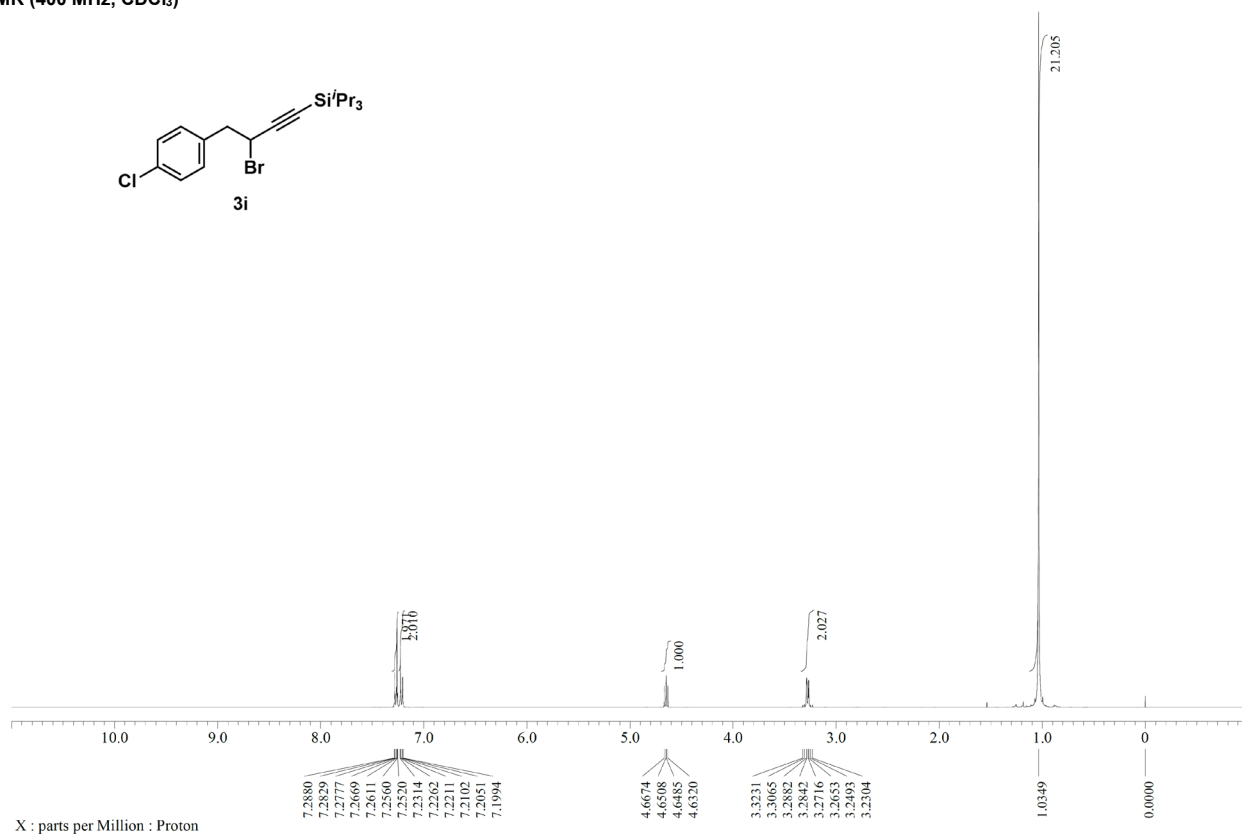

<sup>13</sup>C NMR (101 MHz, CDCl<sub>3</sub>)

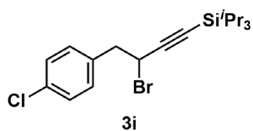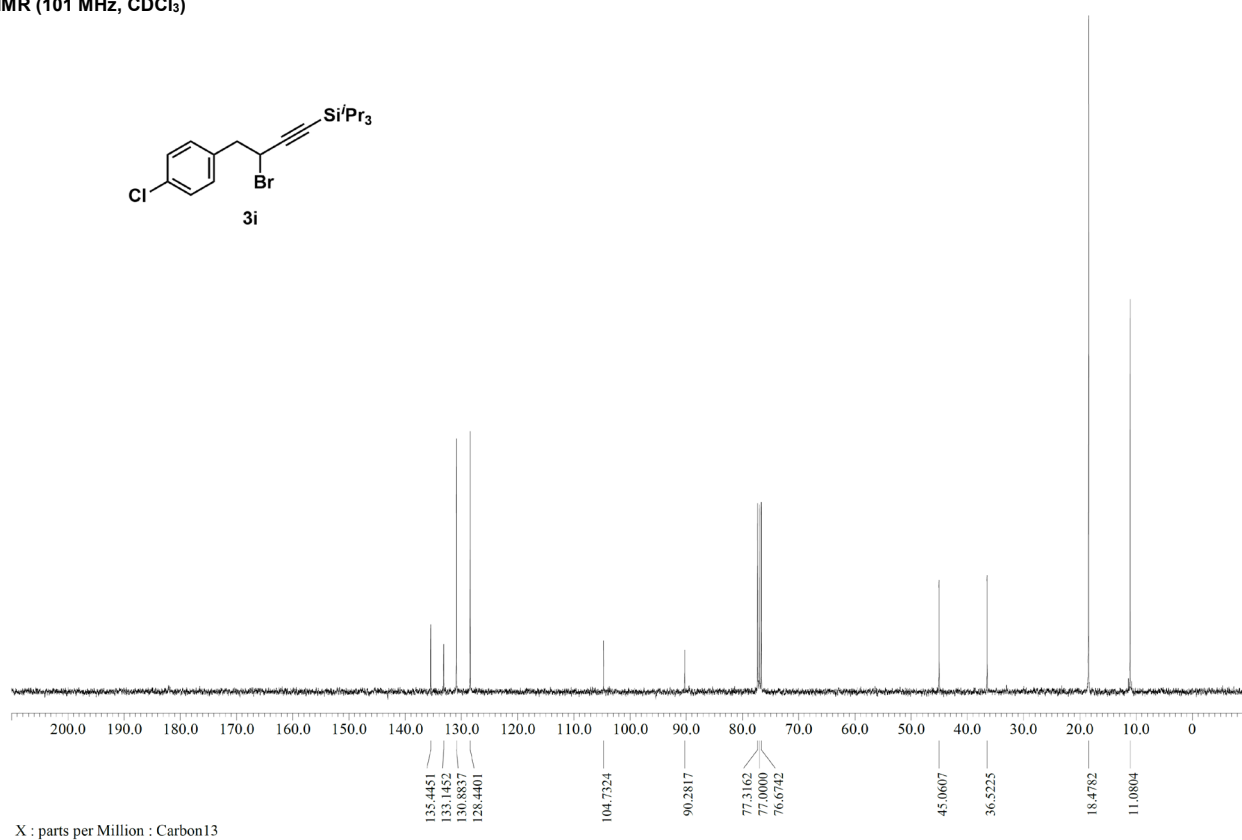

<sup>1</sup>H NMR (400 MHz, CDCl<sub>3</sub>)

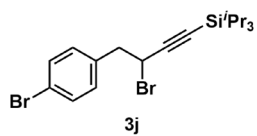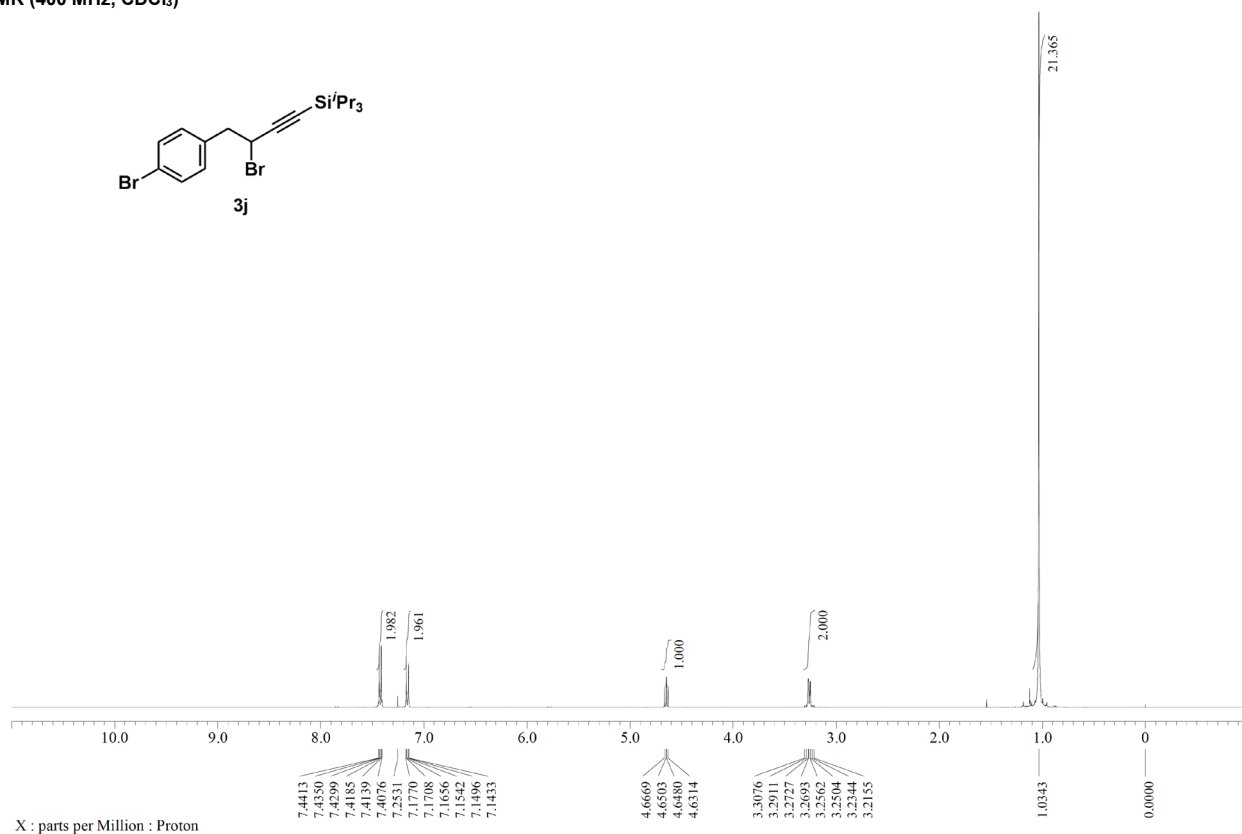

<sup>13</sup>C NMR (101 MHz, CDCl<sub>3</sub>)

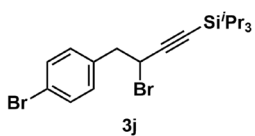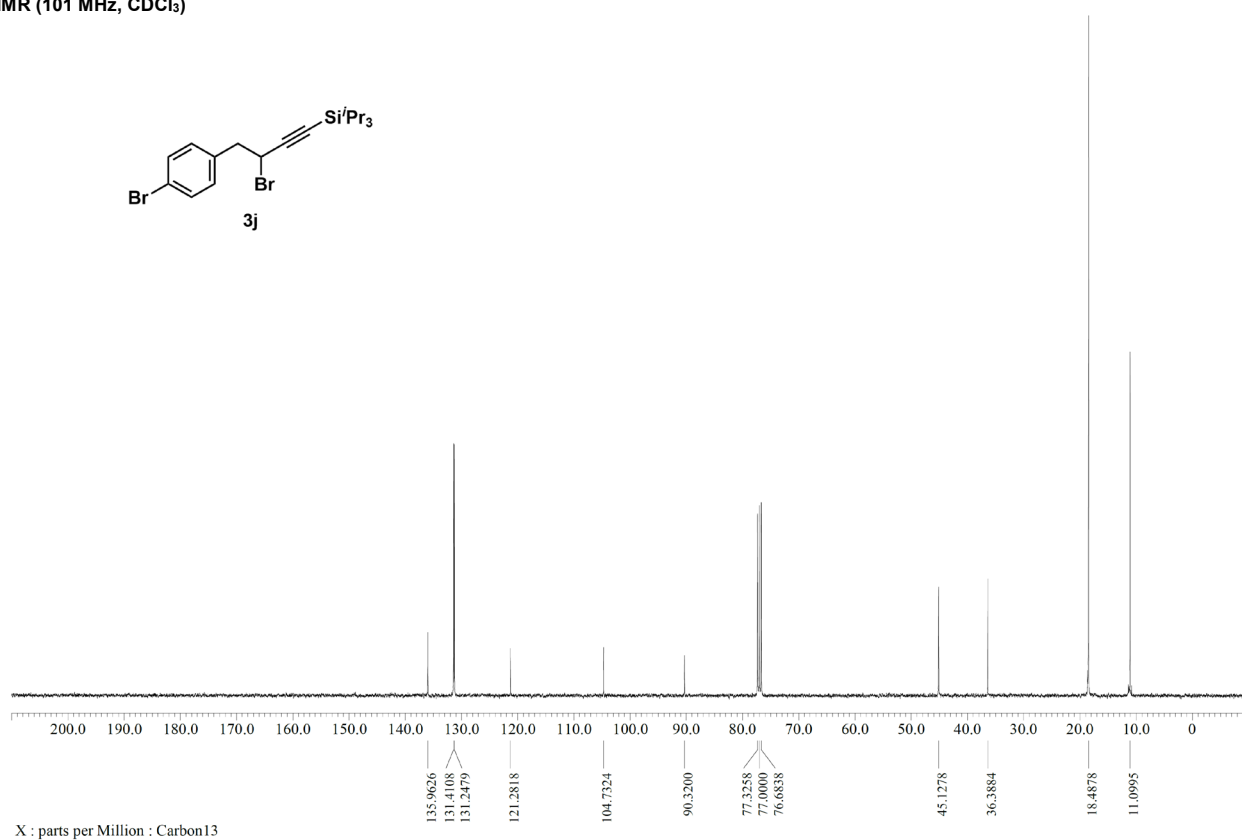

<sup>1</sup>H NMR (400 MHz, CDCl<sub>3</sub>)

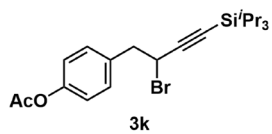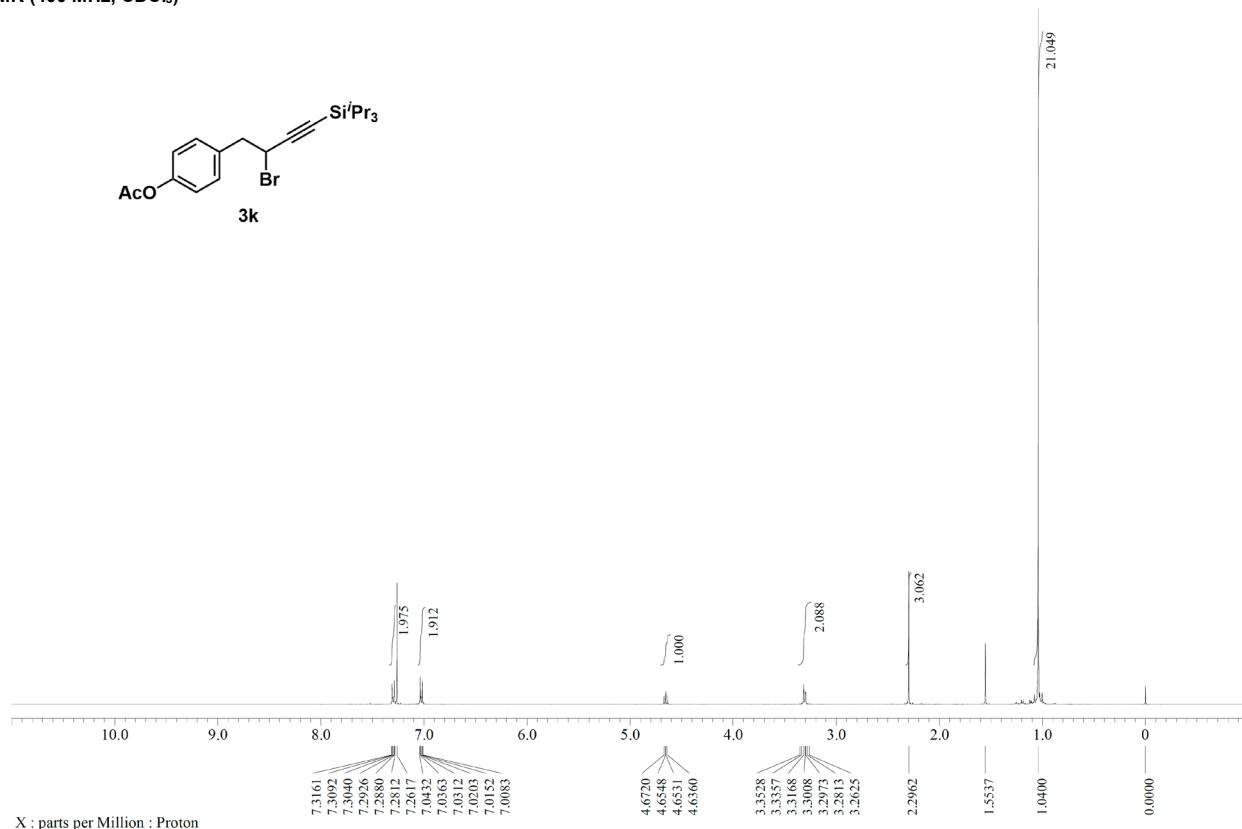

<sup>13</sup>C NMR (101 MHz, CDCl<sub>3</sub>)

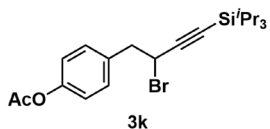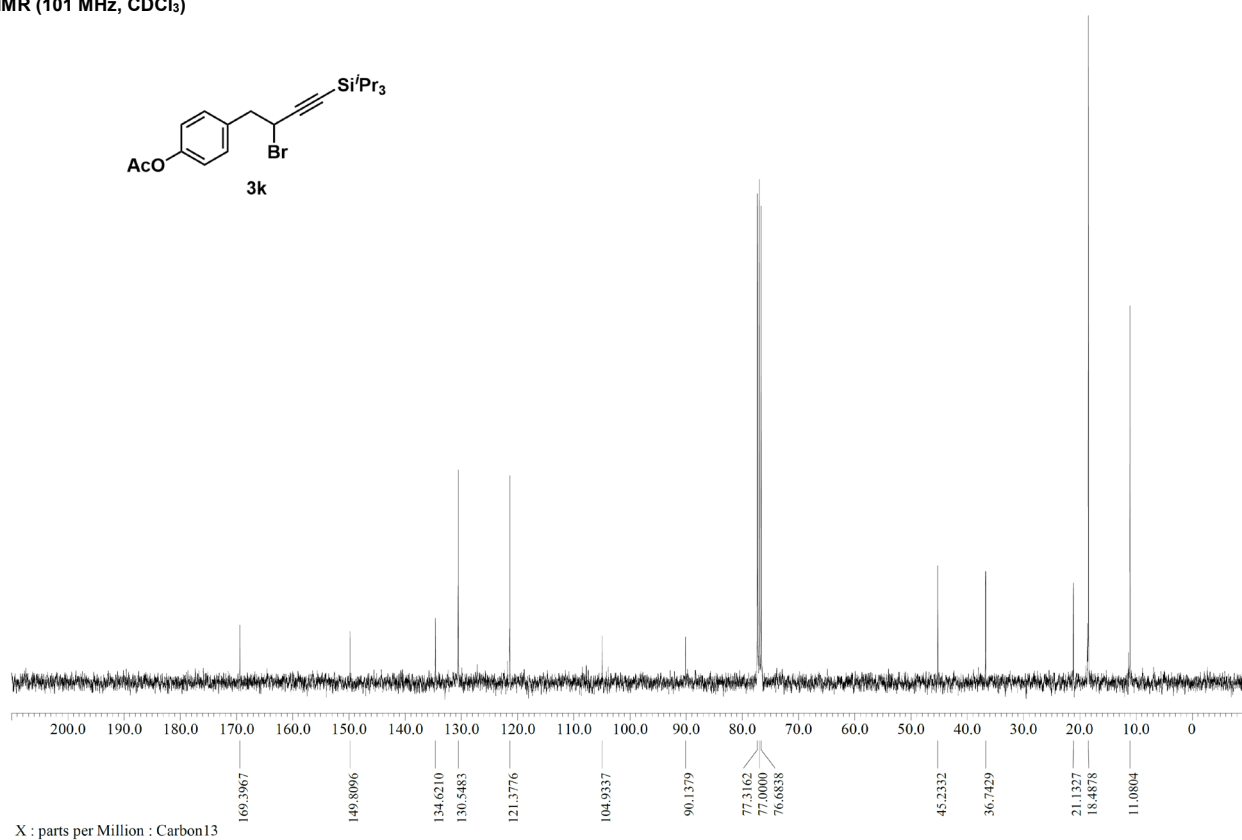

<sup>1</sup>H NMR (400 MHz, CDCl<sub>3</sub>)

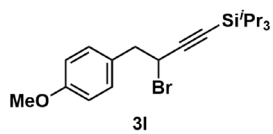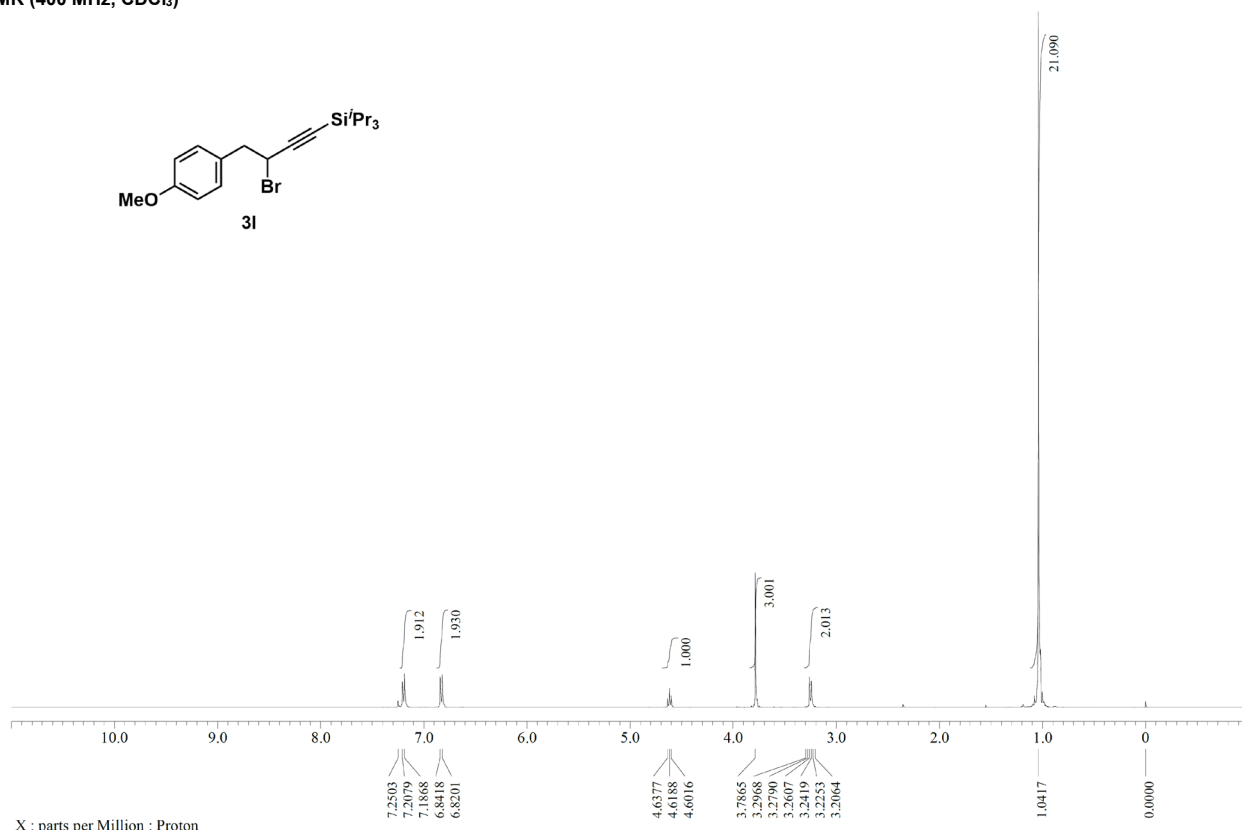

<sup>13</sup>C NMR (101 MHz, CDCl<sub>3</sub>)

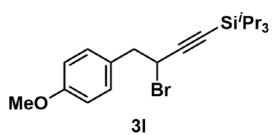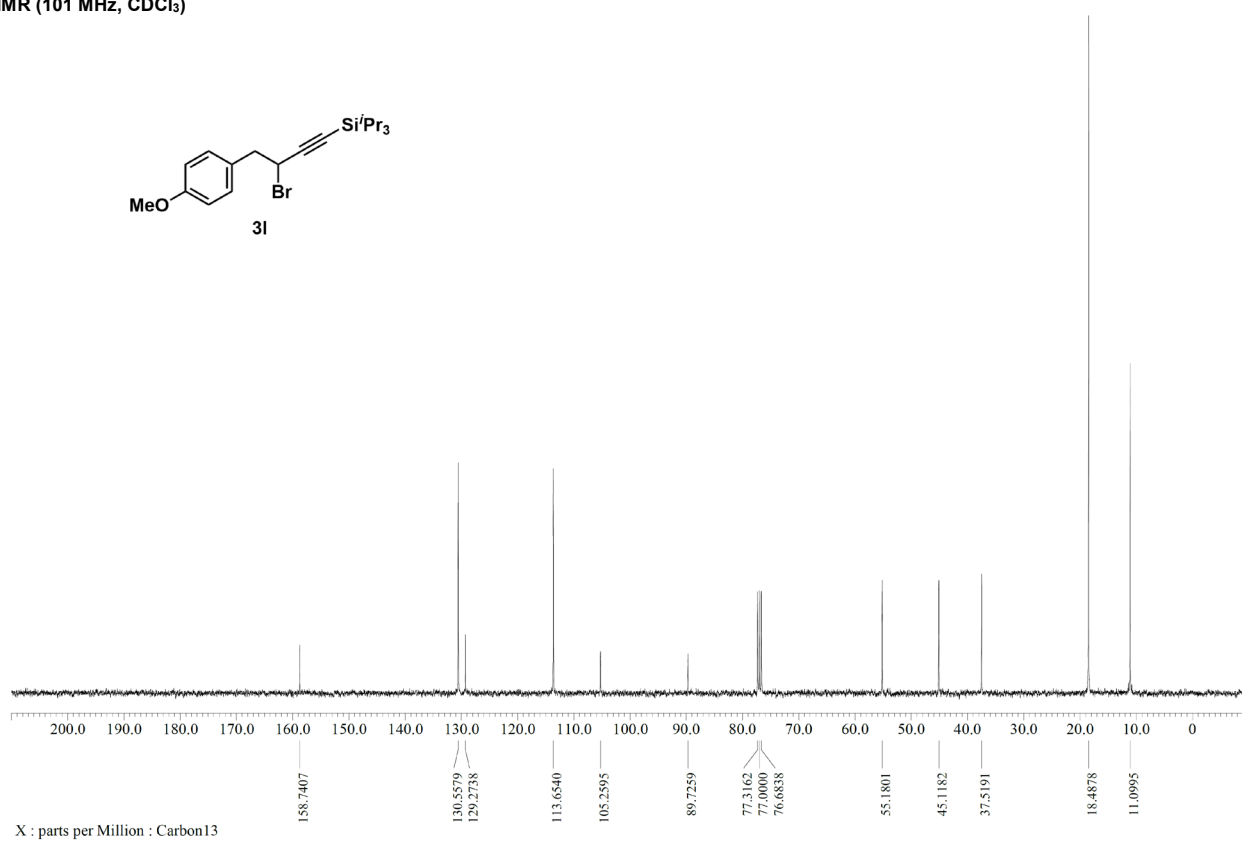

**<sup>1</sup>H NMR (400 MHz, CDCl<sub>3</sub>)**

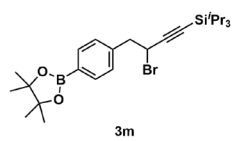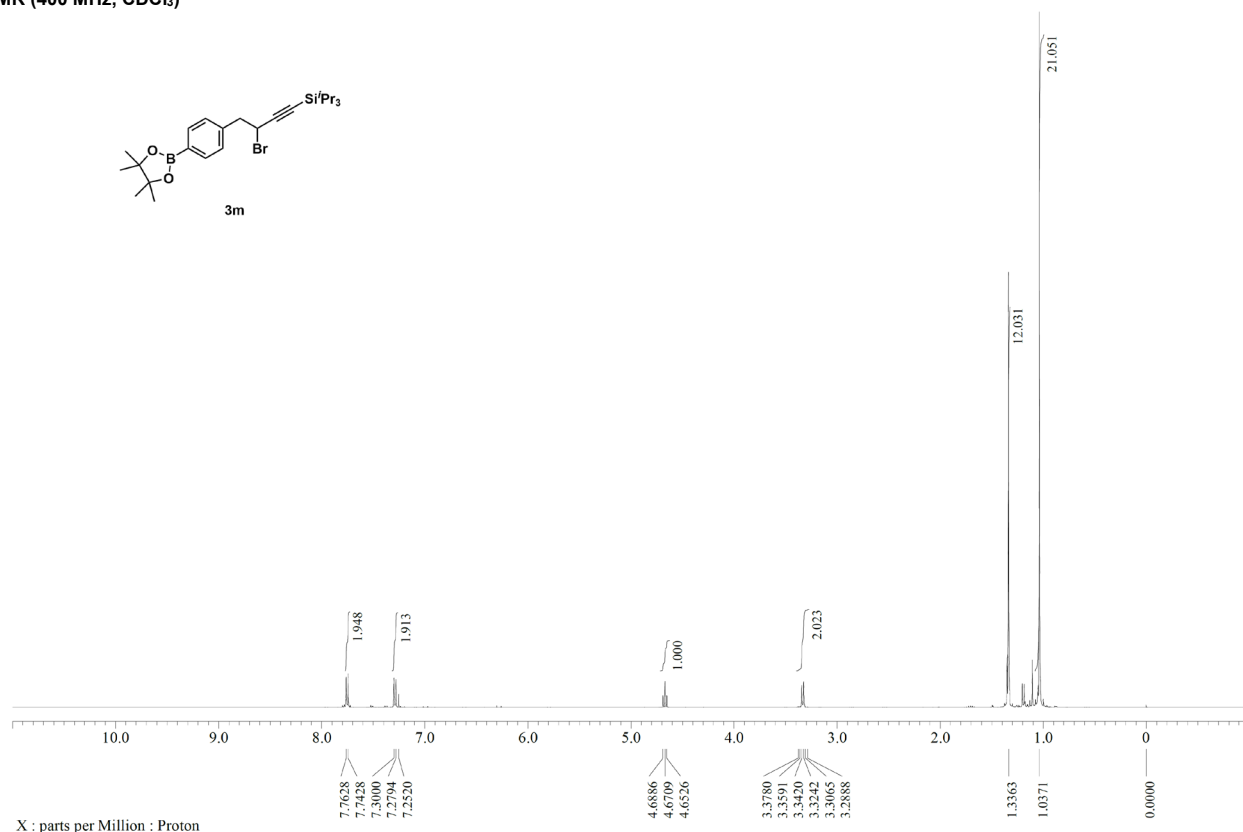

**<sup>13</sup>C NMR (101 MHz, CDCl<sub>3</sub>)**

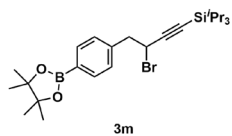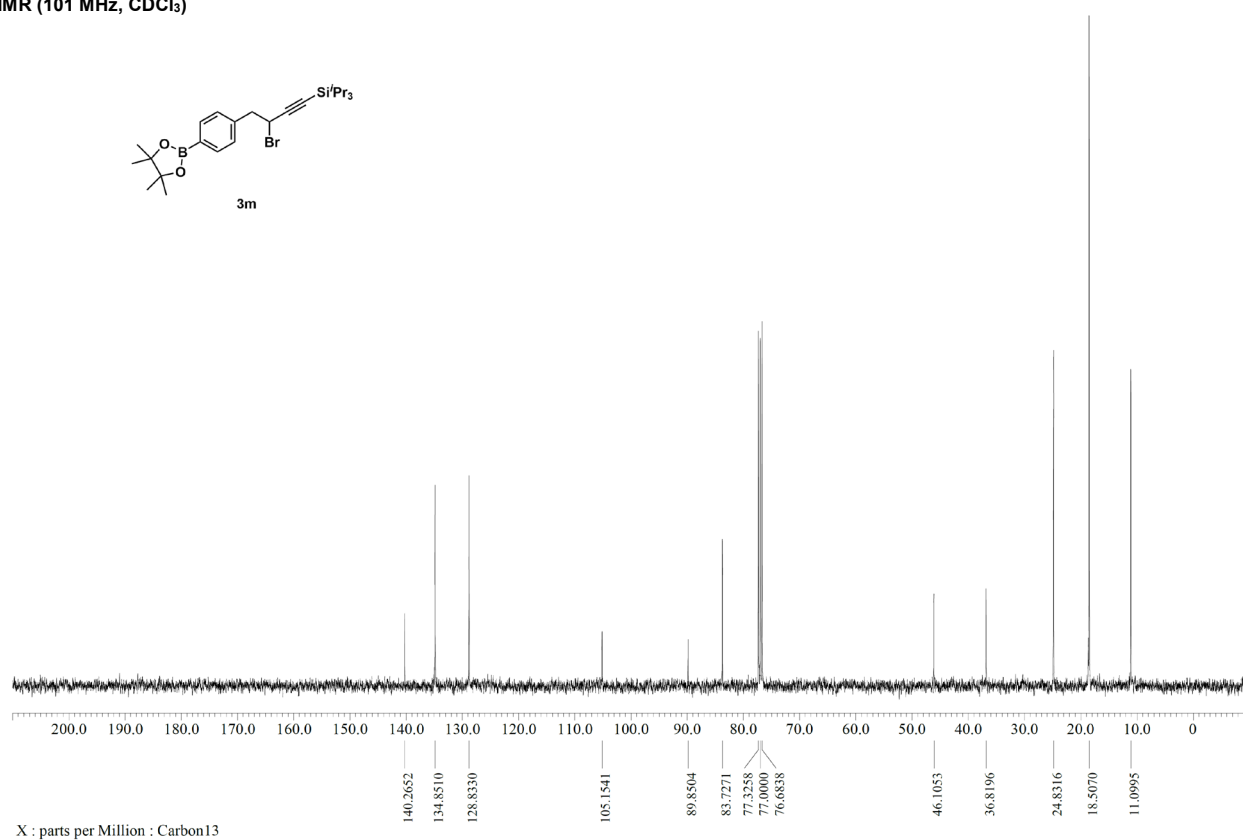

<sup>11</sup>B NMR (128 MHz, CDCl<sub>3</sub>)

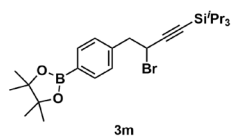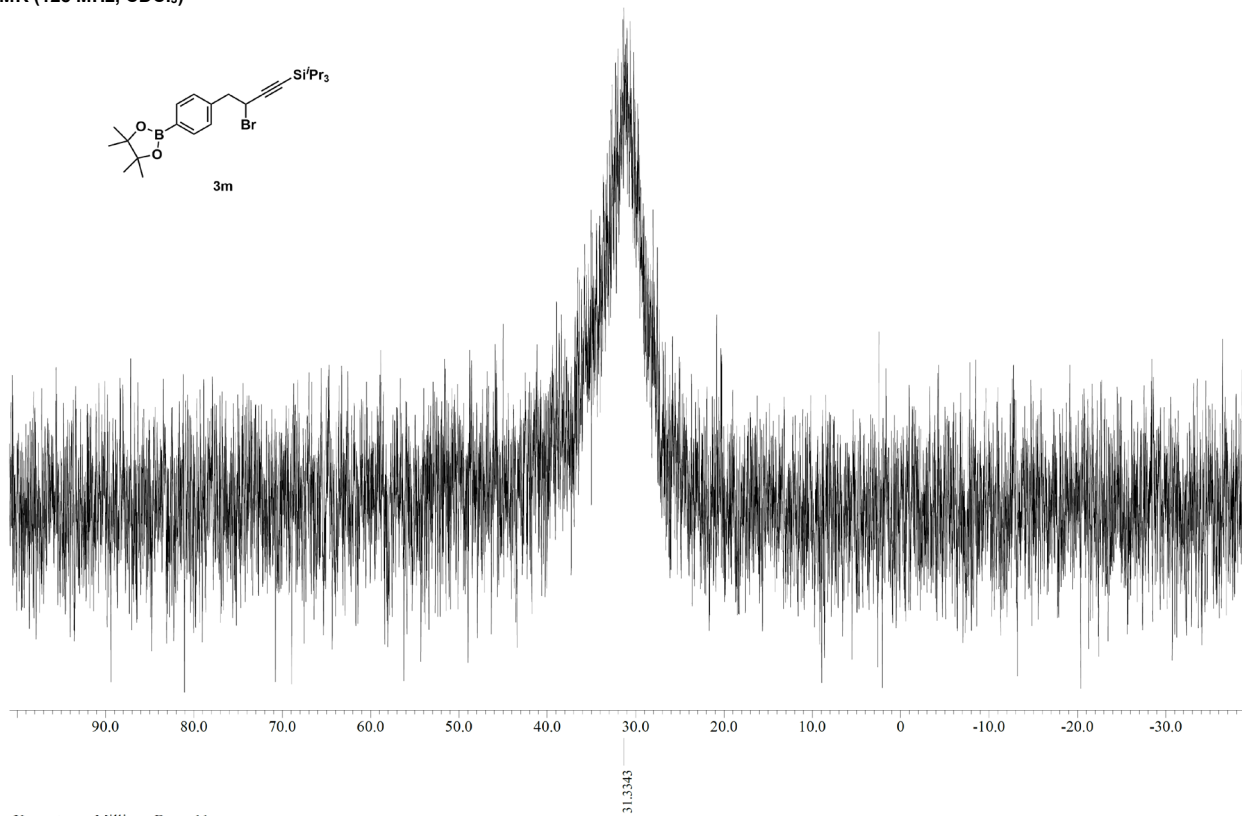

X : parts per Million : Boron11

<sup>1</sup>H NMR (400 MHz, CDCl<sub>3</sub>)

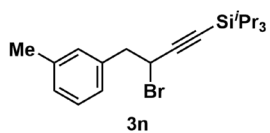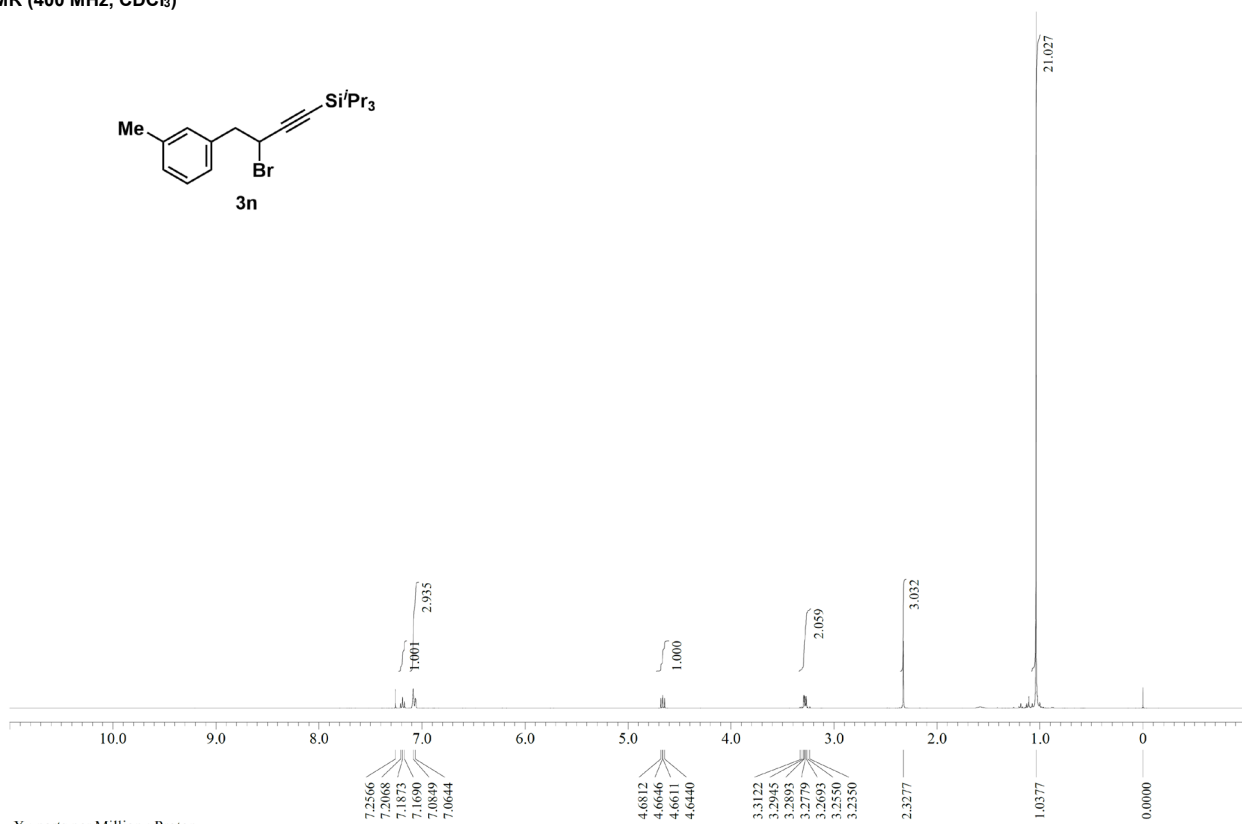

X : parts per Million : Proton

<sup>13</sup>C NMR (101 MHz, CDCl<sub>3</sub>)

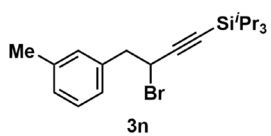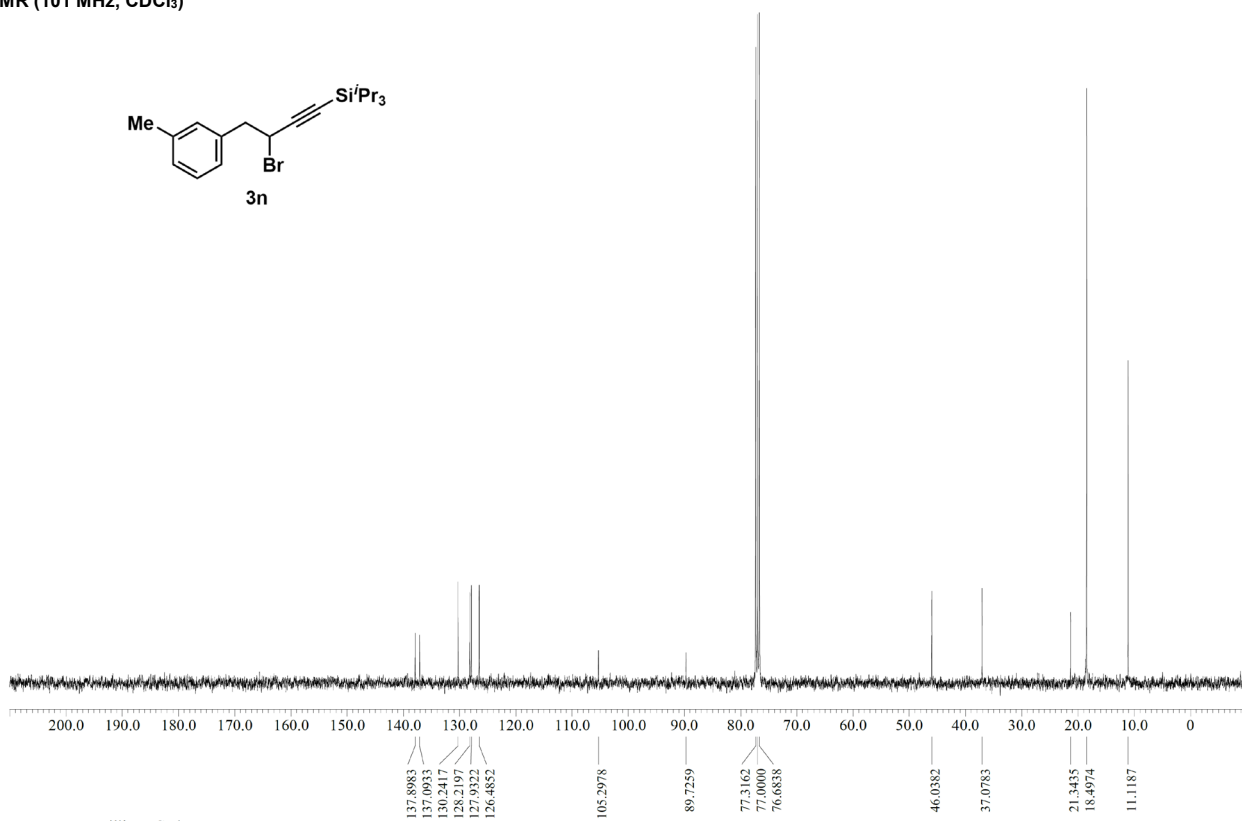

<sup>1</sup>H NMR (400 MHz, CDCl<sub>3</sub>)

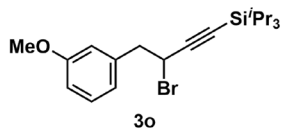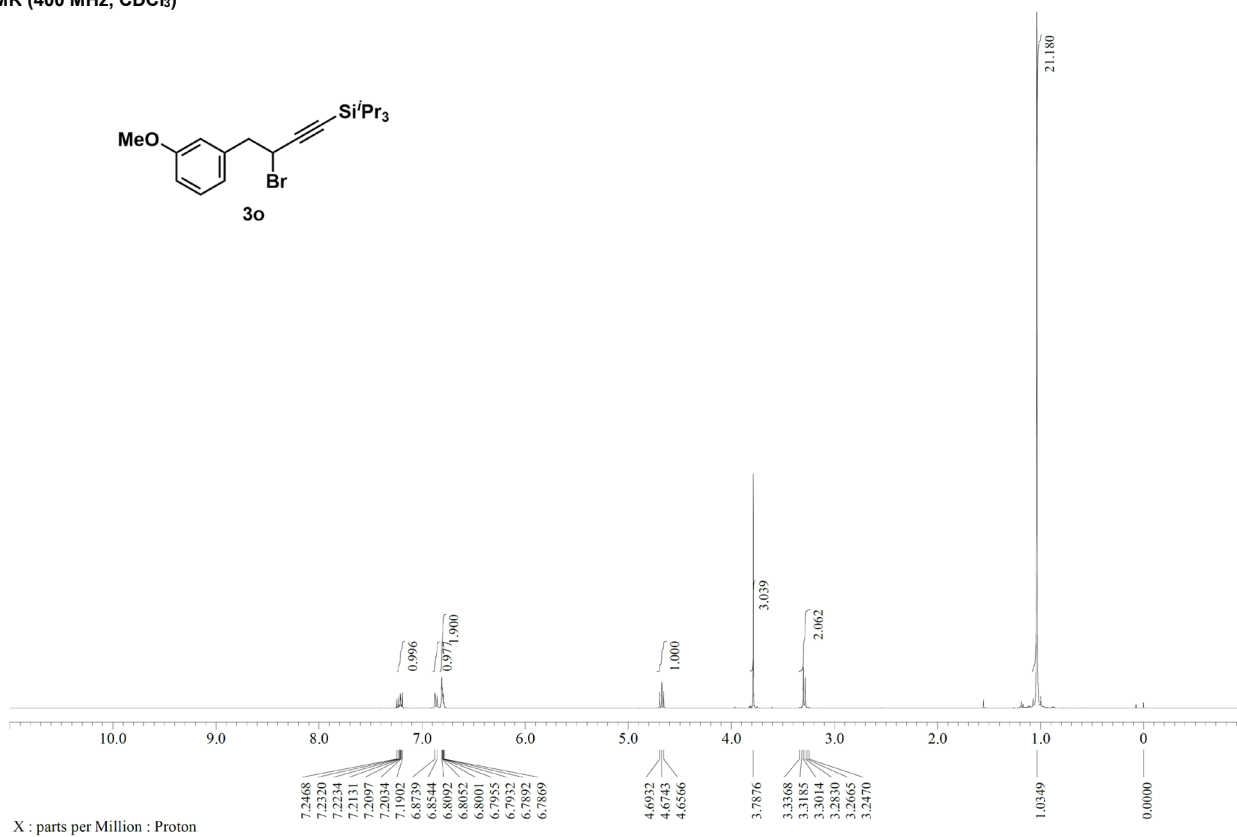

<sup>13</sup>C NMR (101 MHz, CDCl<sub>3</sub>)

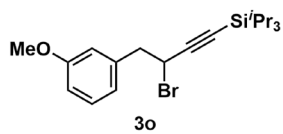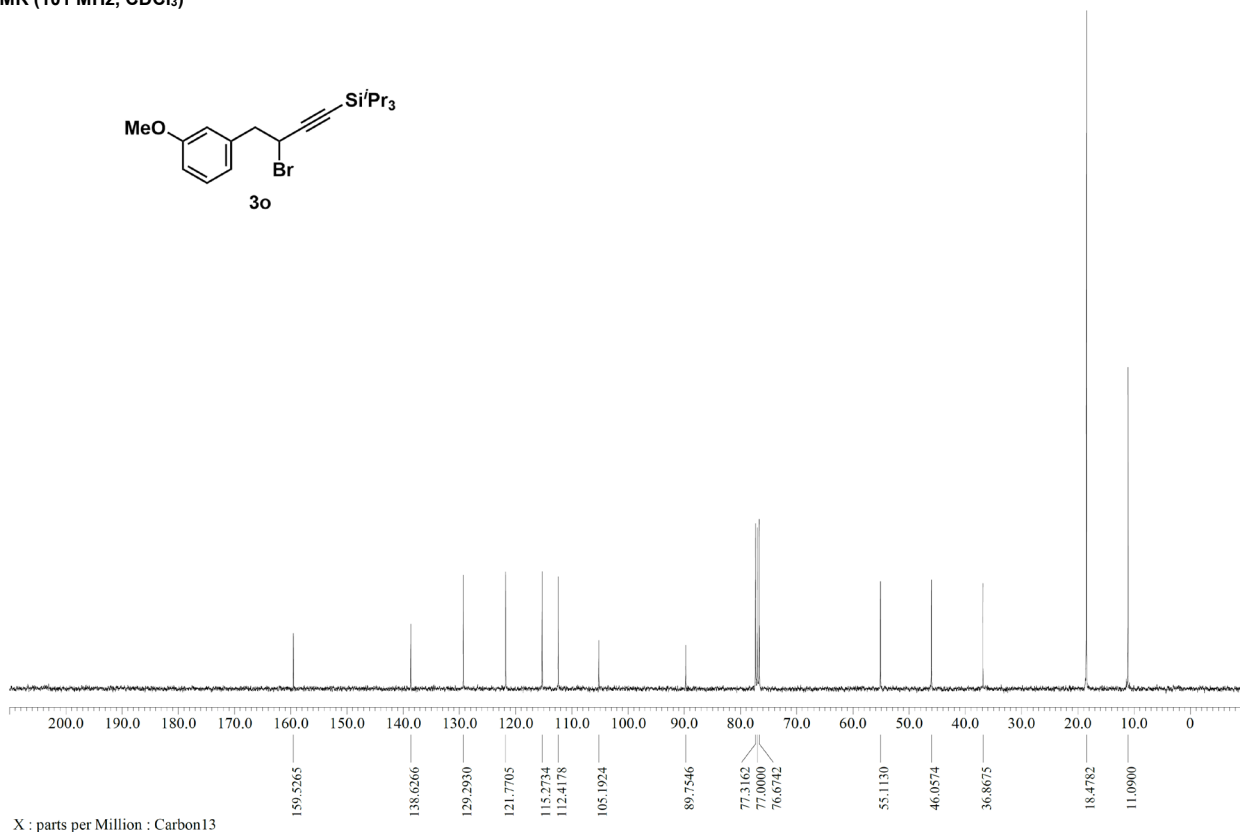

<sup>1</sup>H NMR (400 MHz, CDCl<sub>3</sub>)

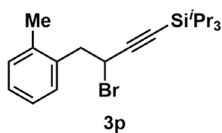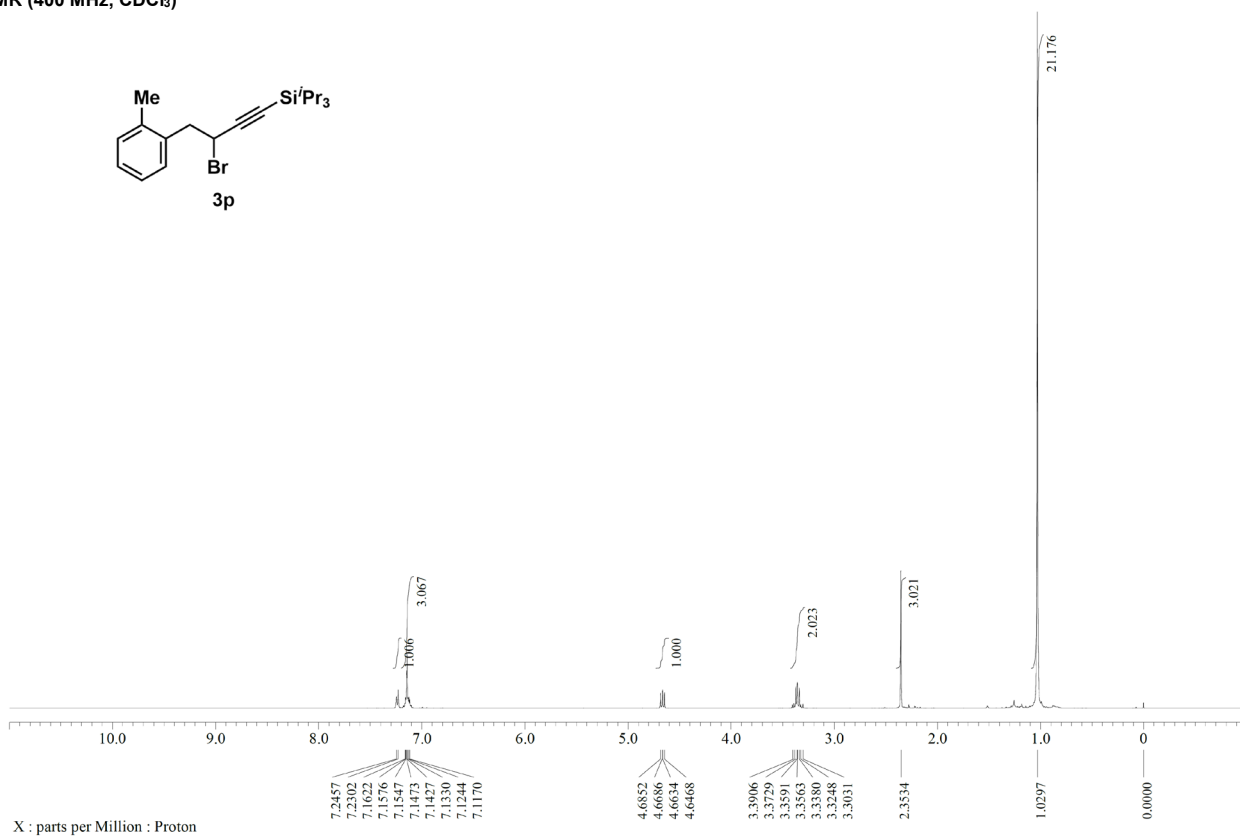



<sup>13</sup>C NMR (101 MHz, CDCl<sub>3</sub>)

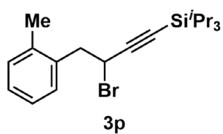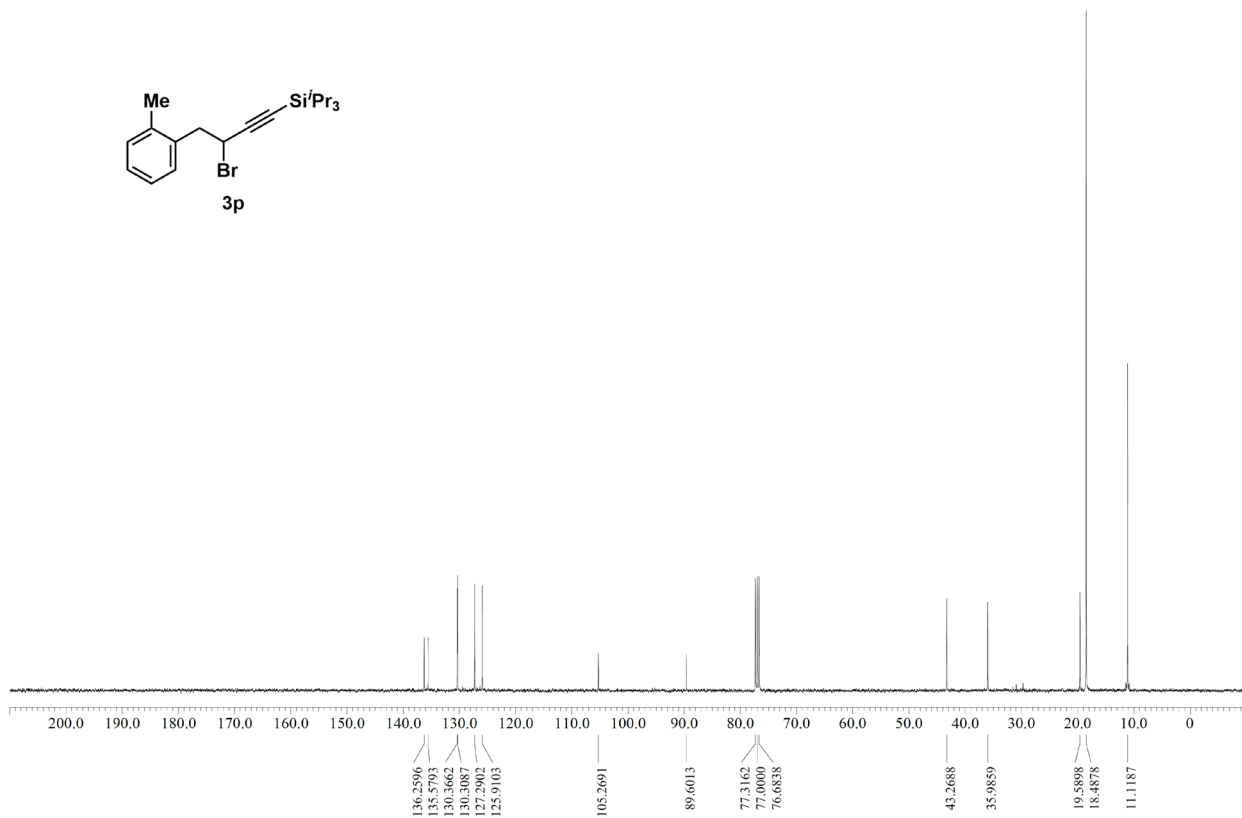

<sup>1</sup>H NMR (400 MHz, CDCl<sub>3</sub>)

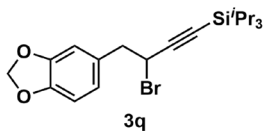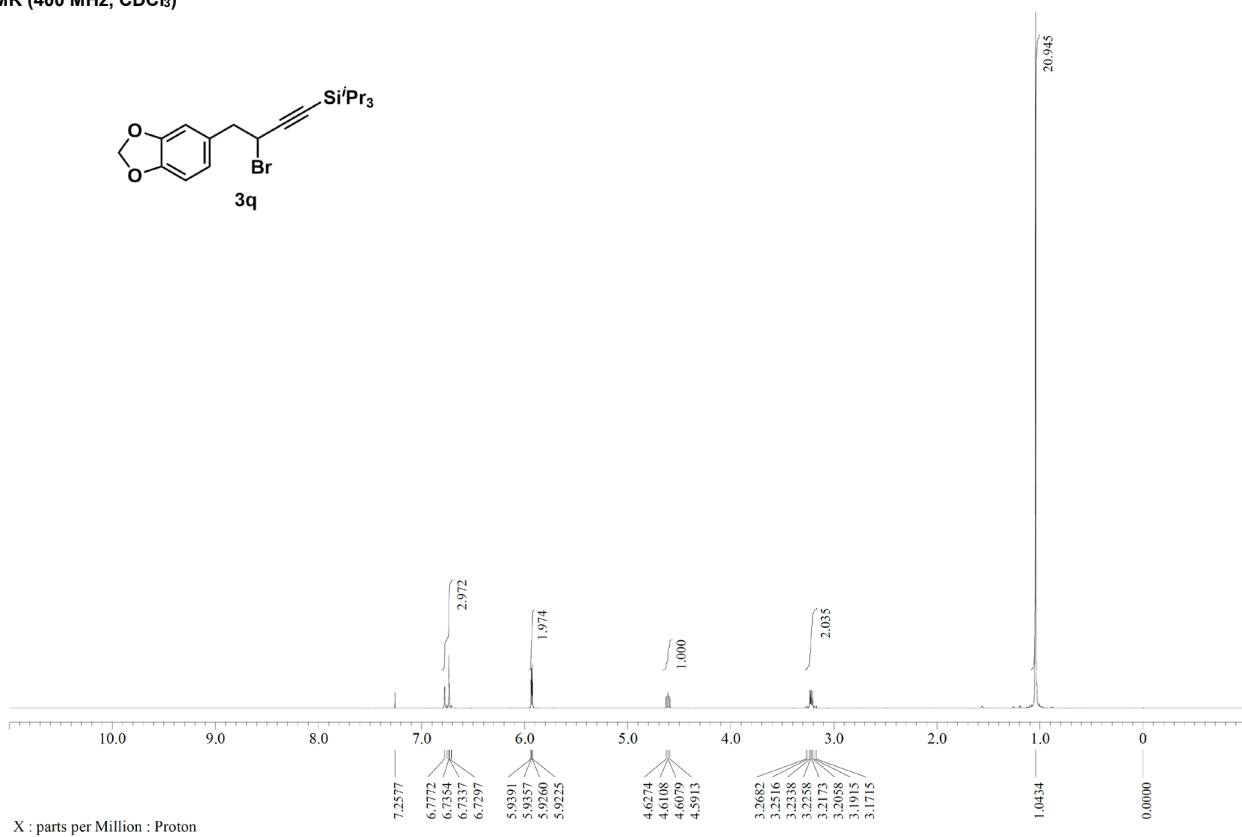

<sup>13</sup>C NMR (101 MHz, CDCl<sub>3</sub>)

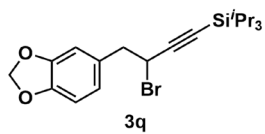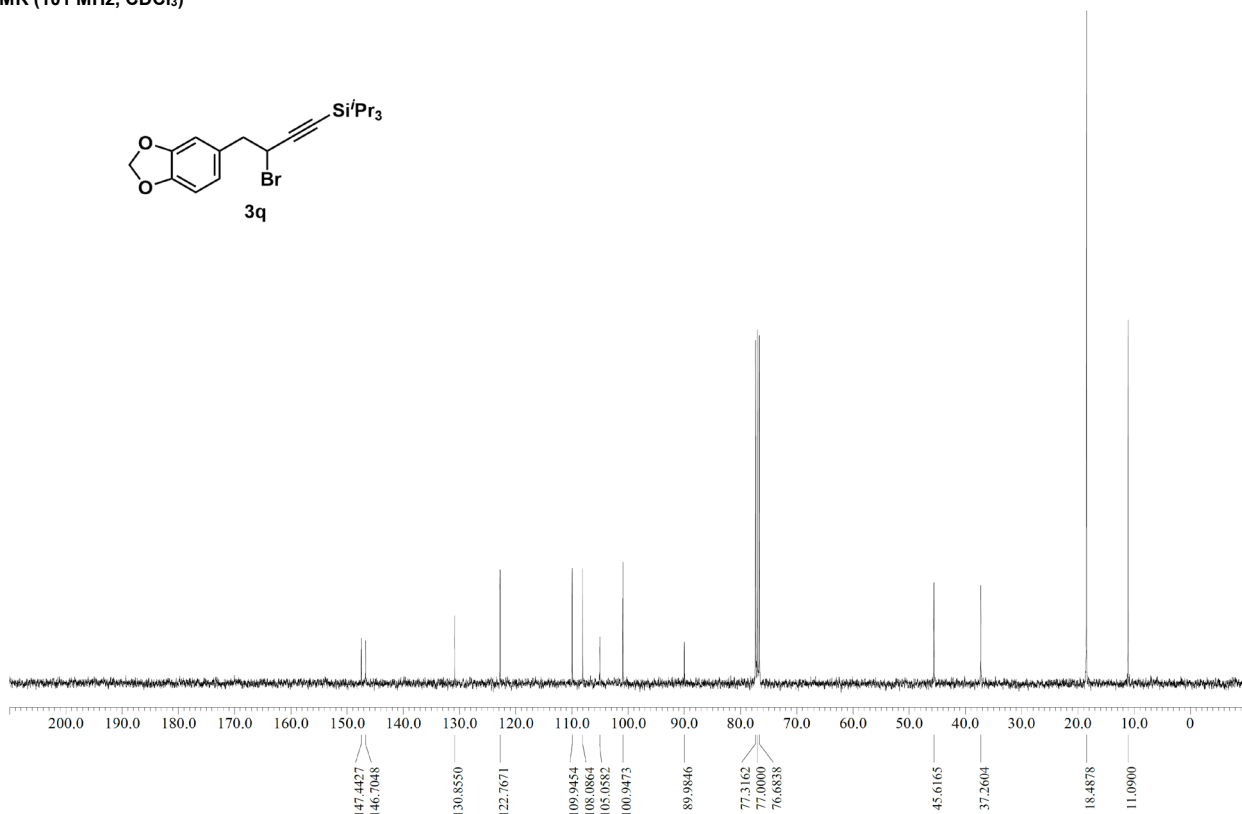

<sup>1</sup>H NMR (400 MHz, CDCl<sub>3</sub>)

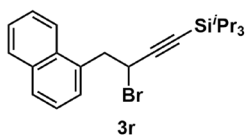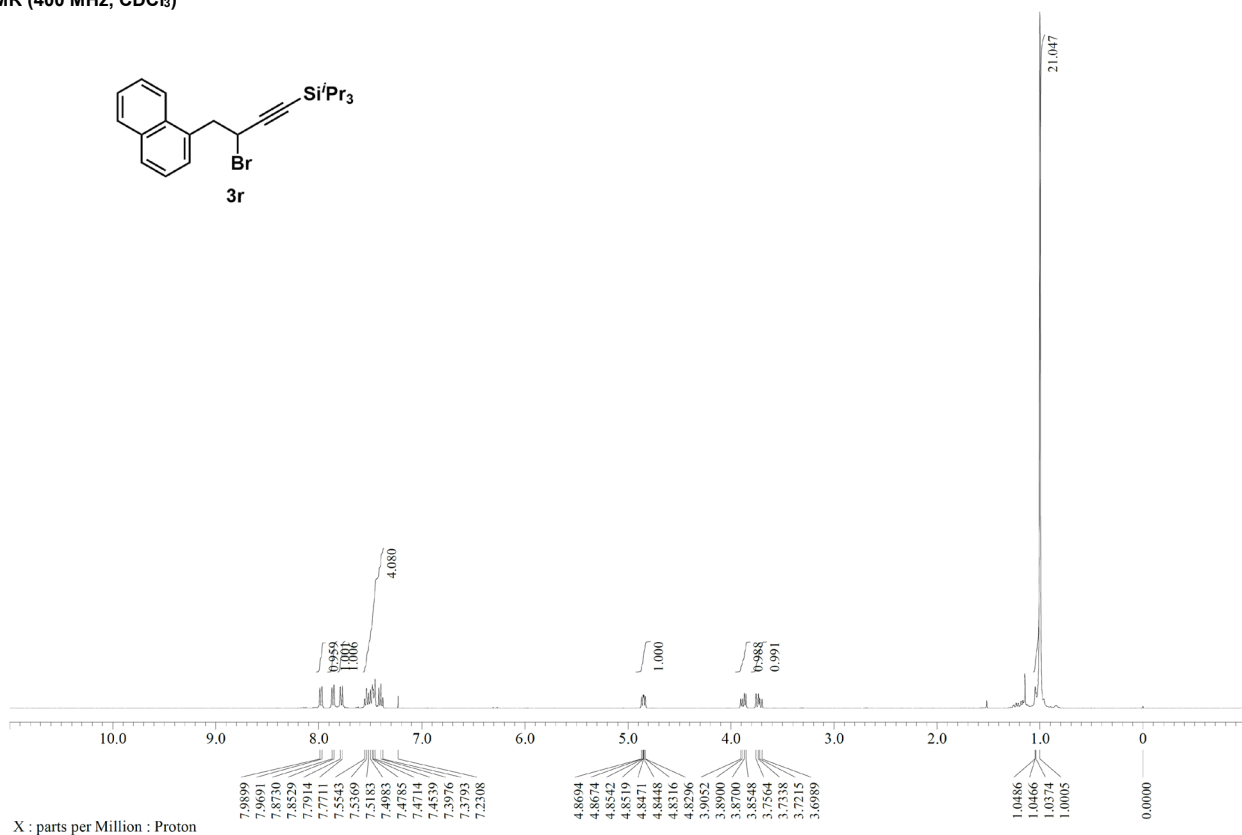

<sup>13</sup>C NMR (101 MHz, CDCl<sub>3</sub>)

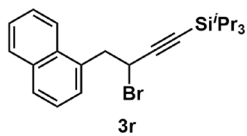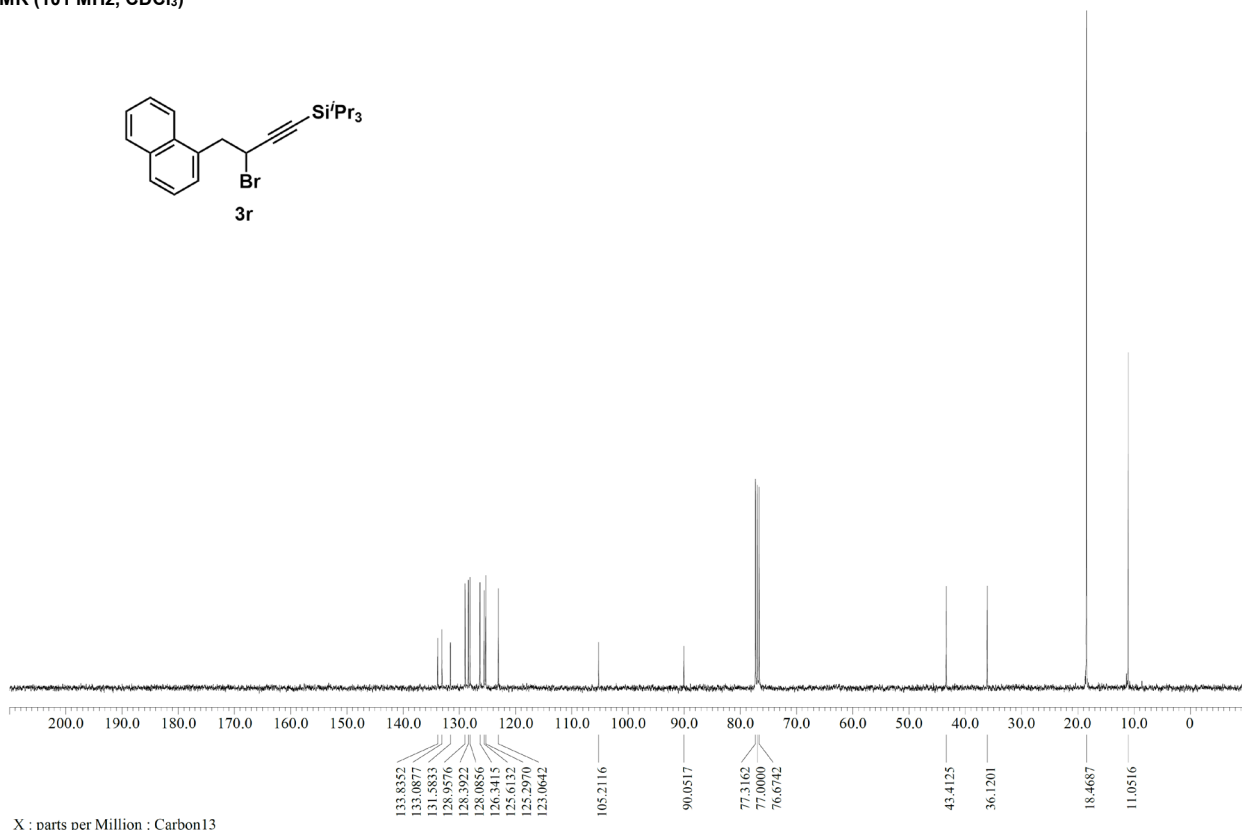

<sup>1</sup>H NMR (400 MHz, CDCl<sub>3</sub>)

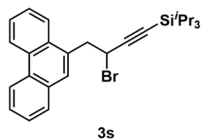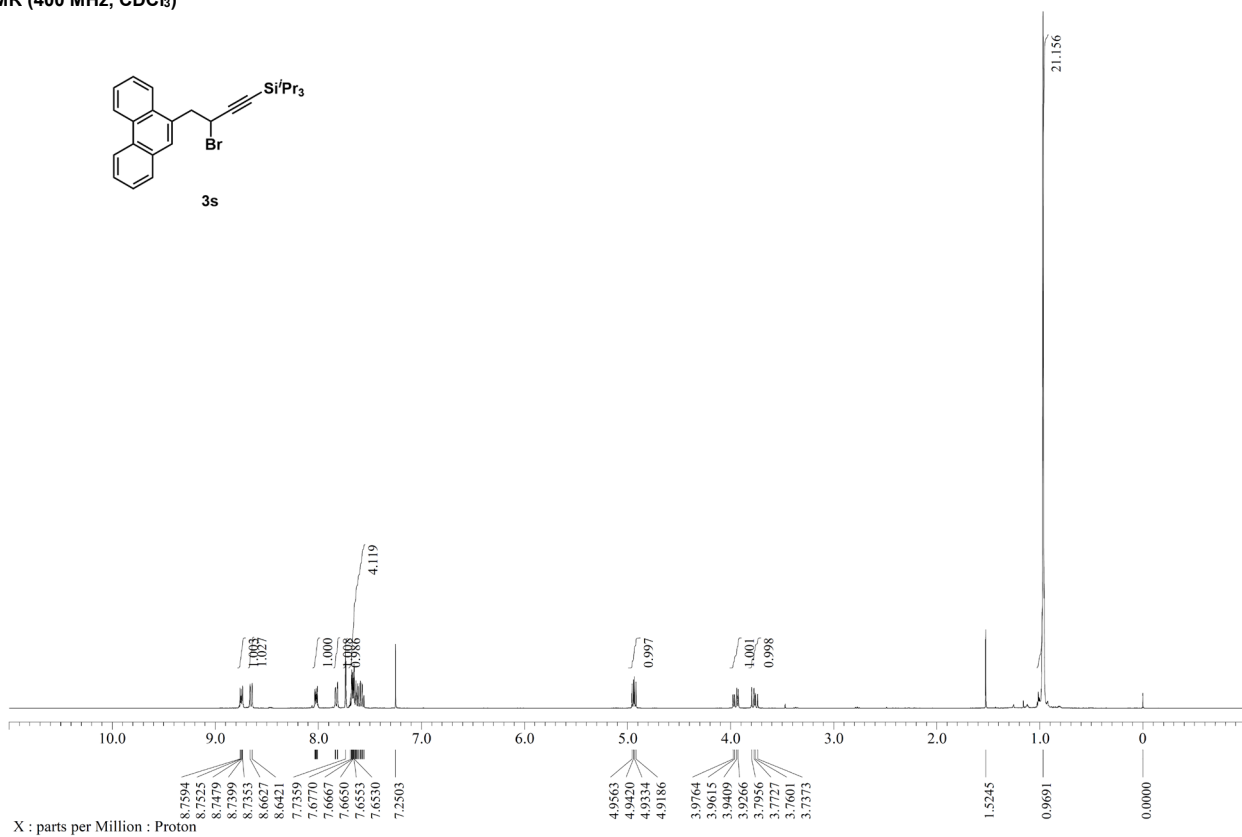

<sup>13</sup>C NMR (101 MHz, CDCl<sub>3</sub>)

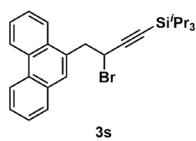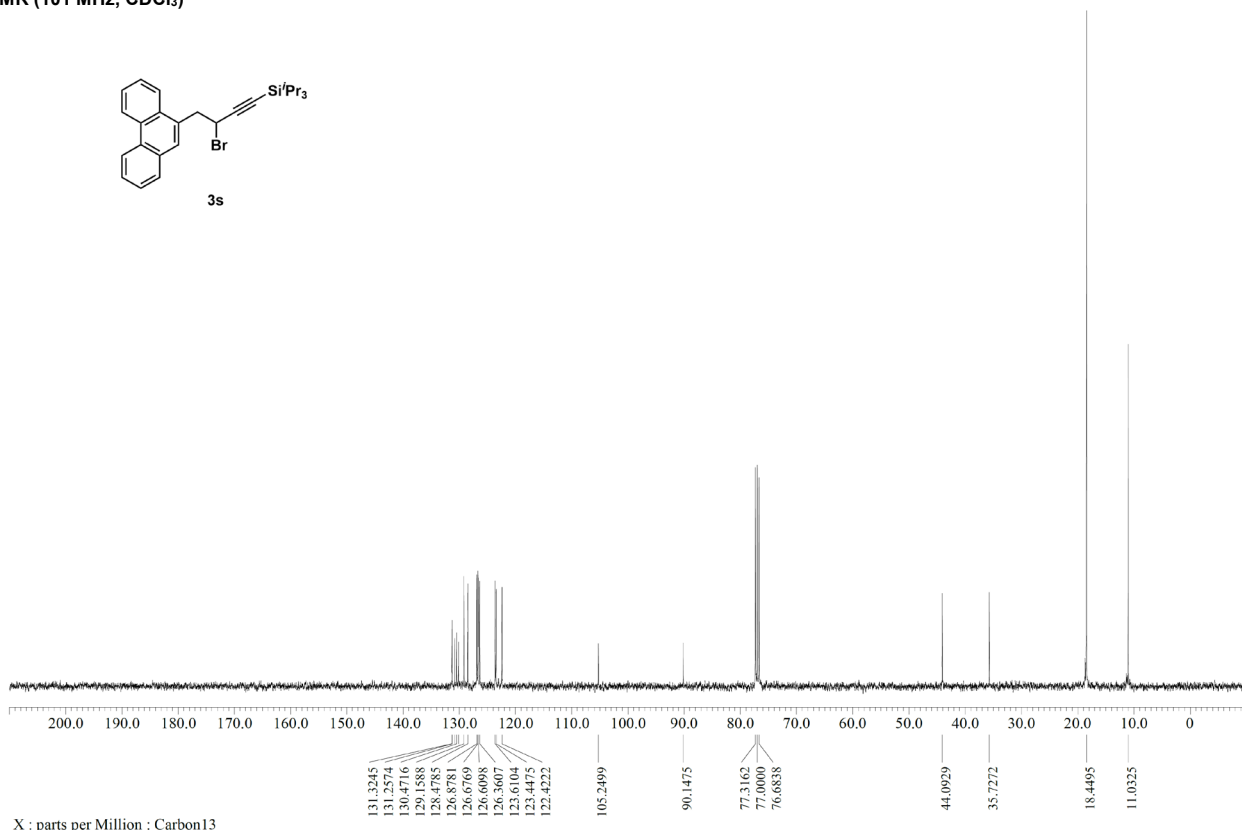

<sup>1</sup>H NMR (400 MHz, CDCl<sub>3</sub>)

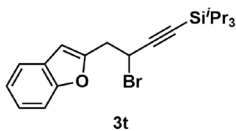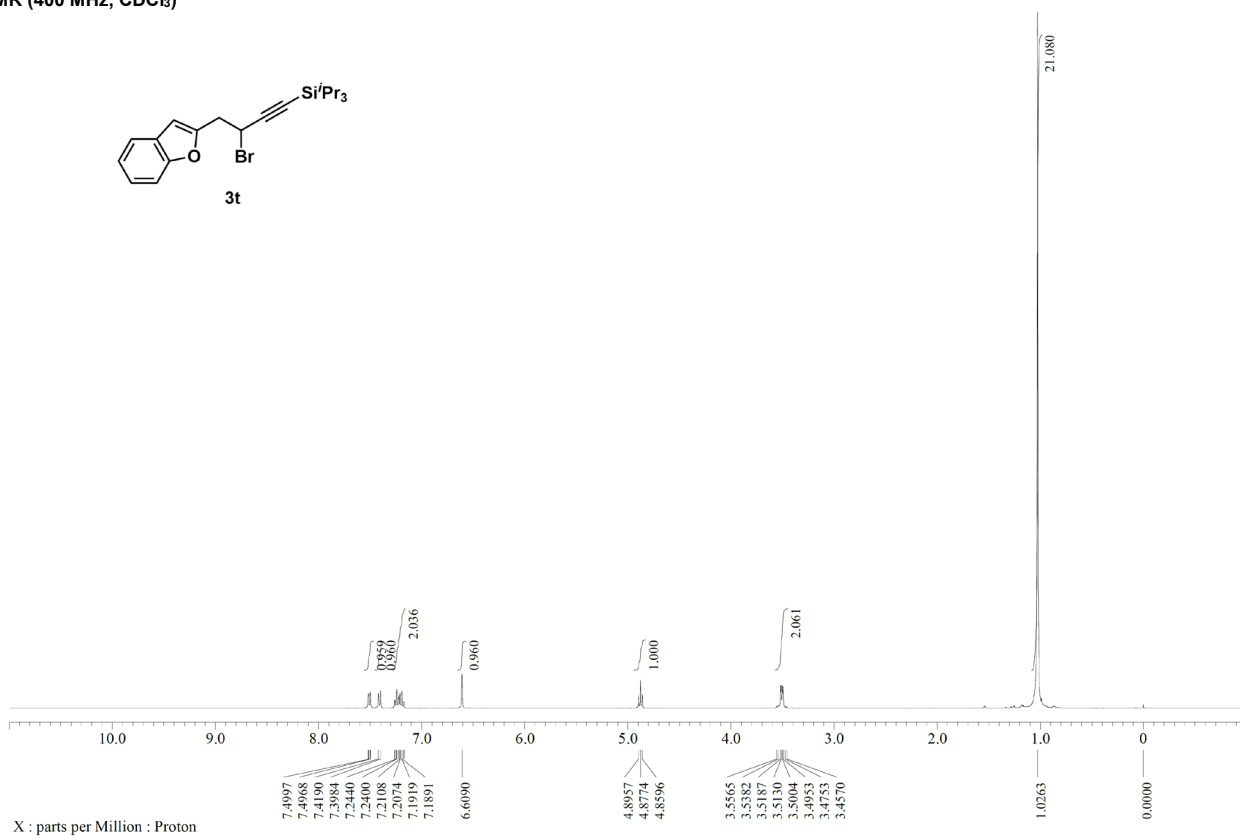

<sup>13</sup>C NMR (101 MHz, CDCl<sub>3</sub>)

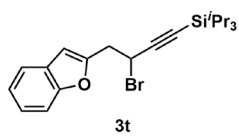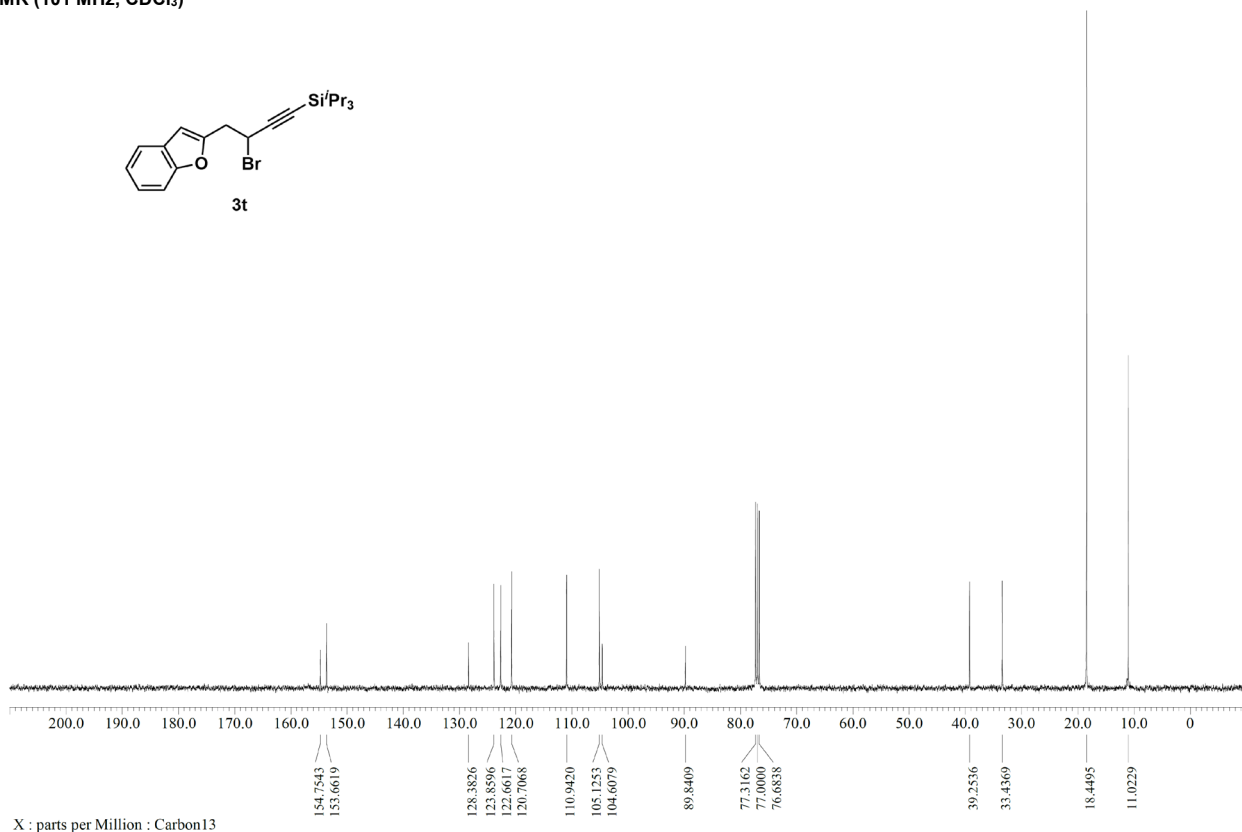

<sup>1</sup>H NMR (400 MHz, CDCl<sub>3</sub>)

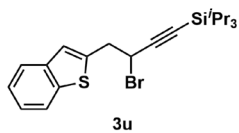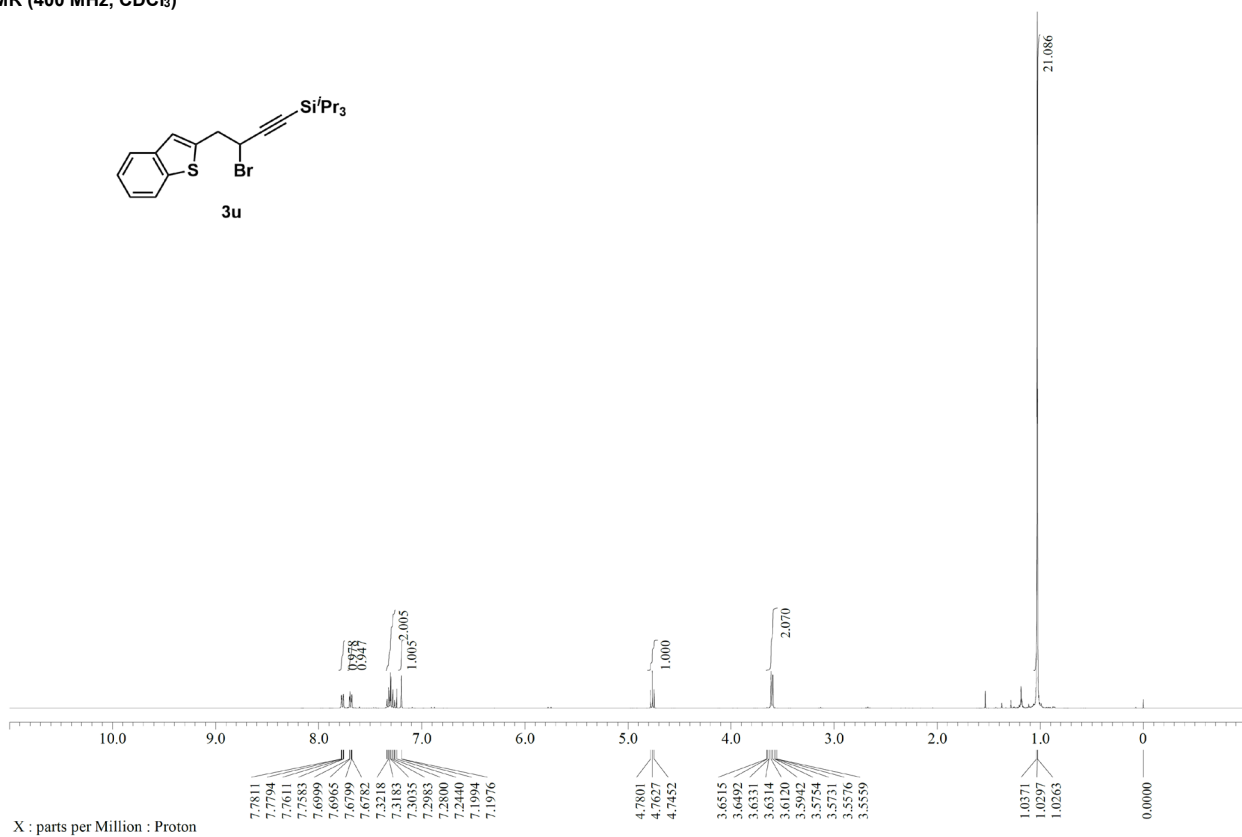

<sup>13</sup>C NMR (101 MHz, CDCl<sub>3</sub>)

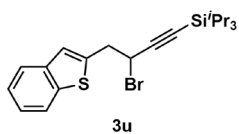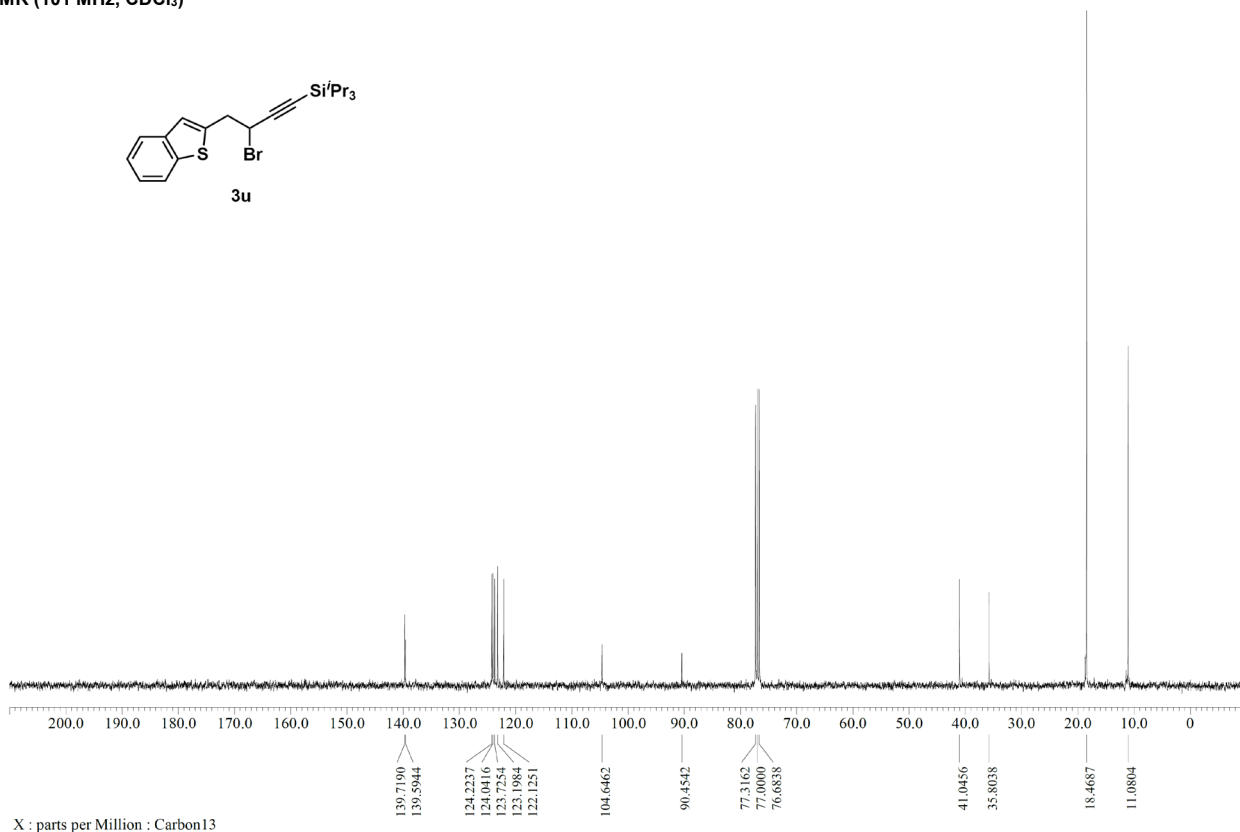

<sup>1</sup>H NMR (400 MHz, CDCl<sub>3</sub>)

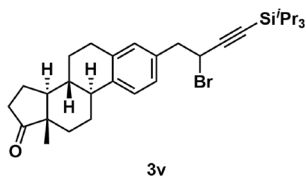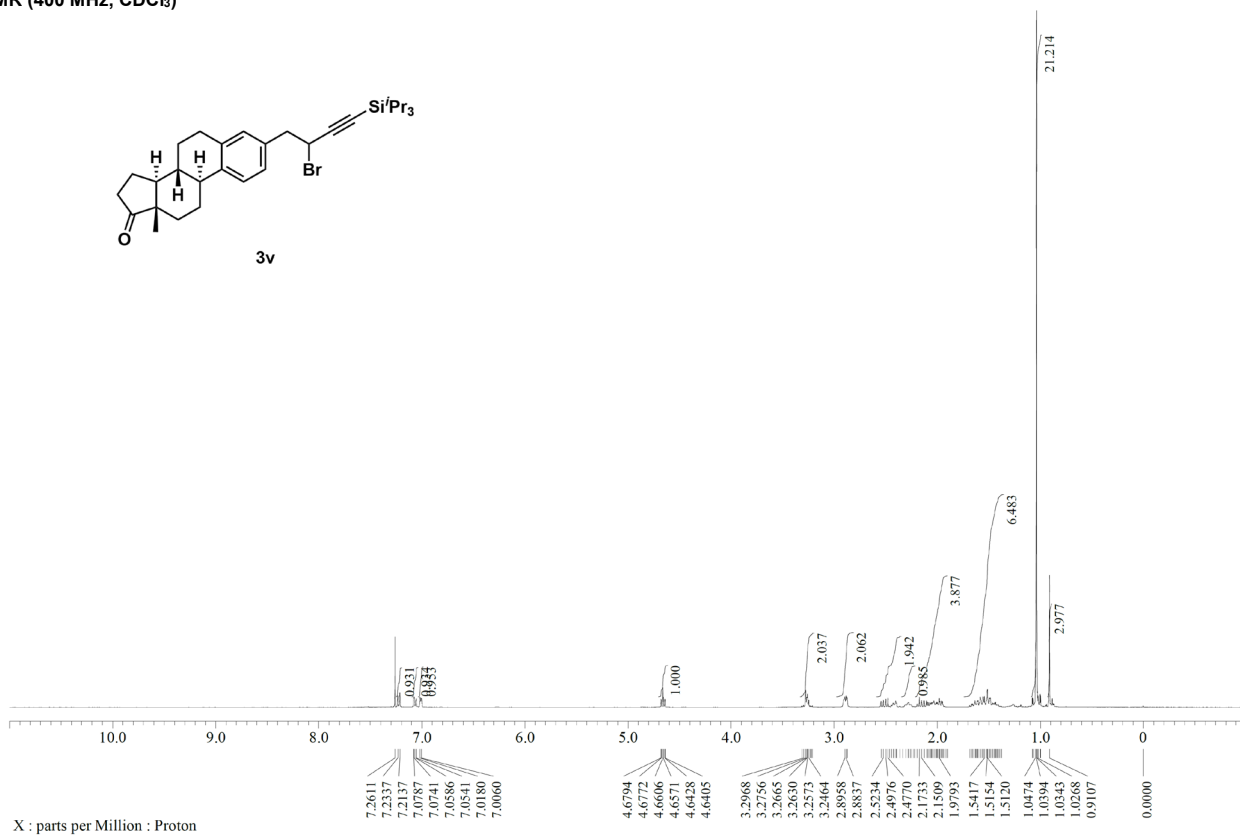

<sup>13</sup>C NMR (101 MHz, CDCl<sub>3</sub>)

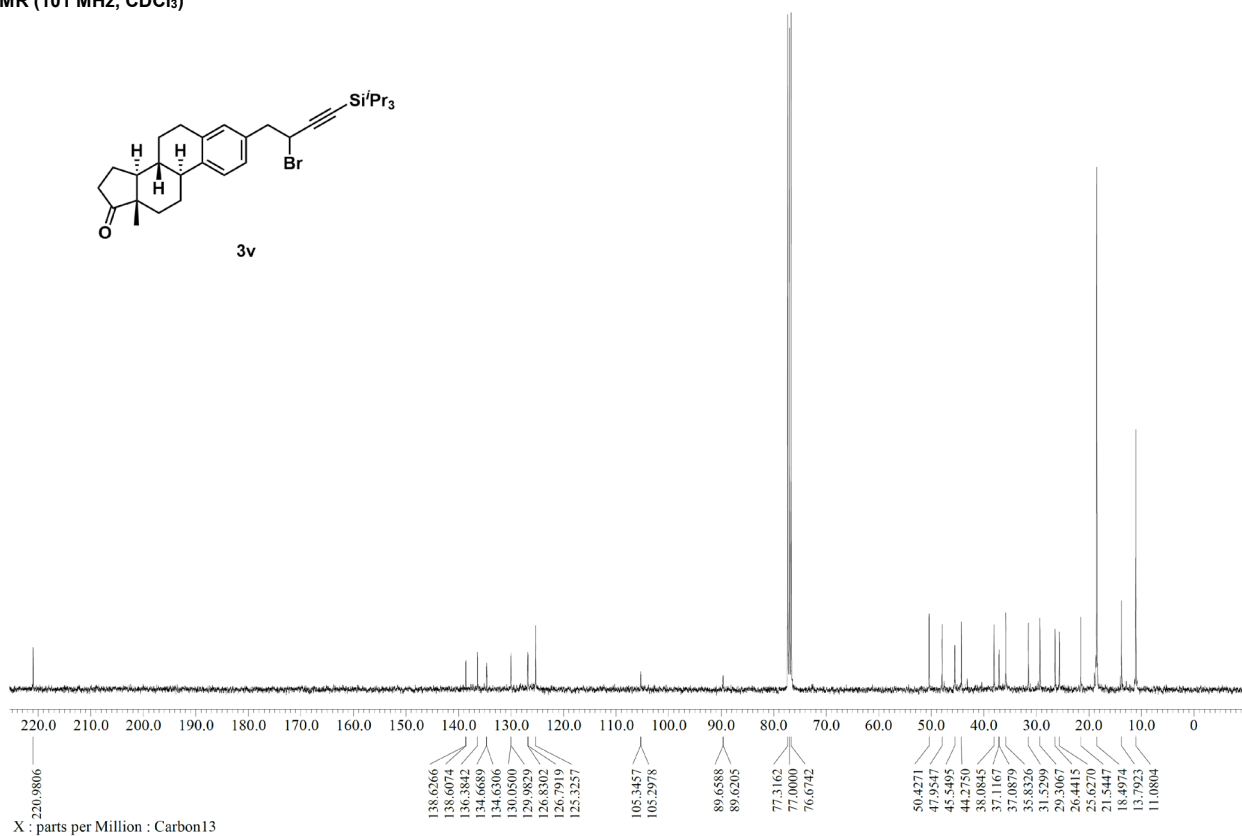

<sup>1</sup>H NMR (400 MHz, CDCl<sub>3</sub>)

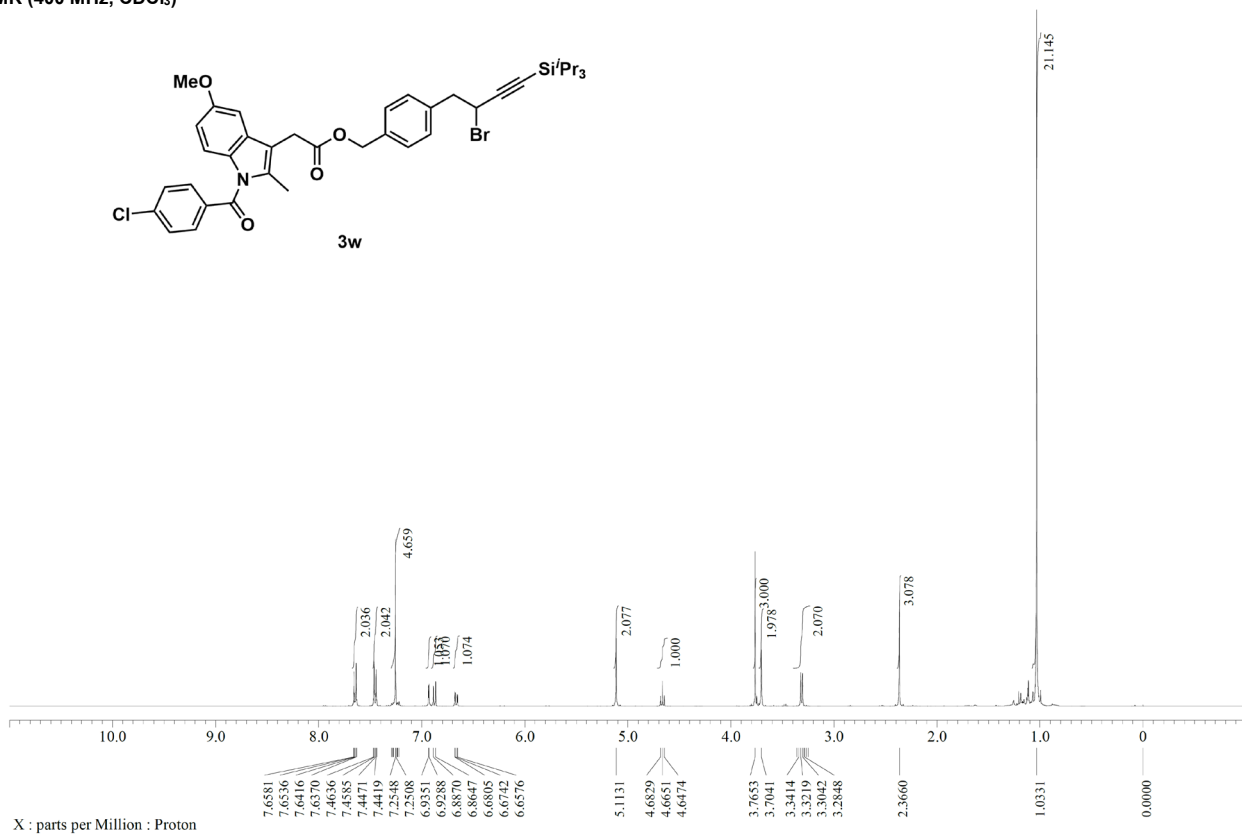

<sup>13</sup>C NMR (101 MHz, CDCl<sub>3</sub>)

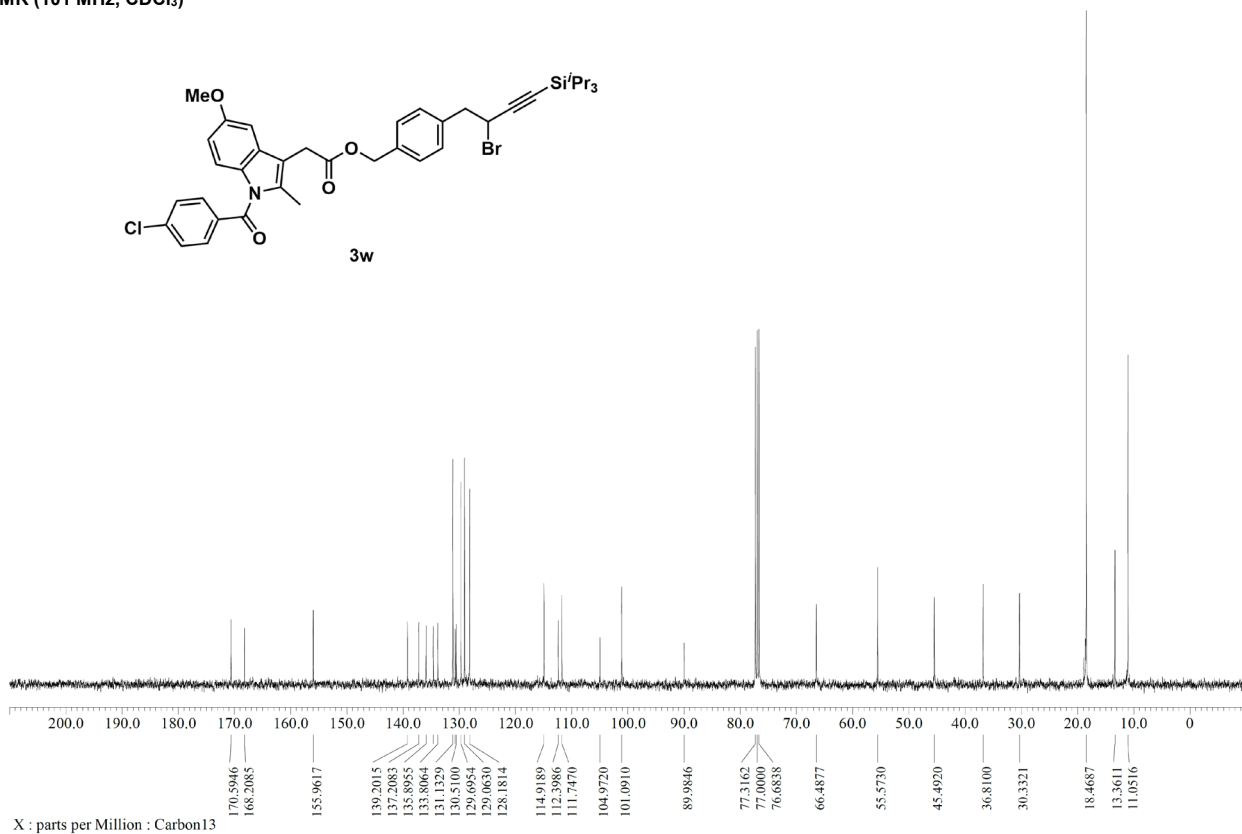

<sup>1</sup>H NMR (400 MHz, CDCl<sub>3</sub>)

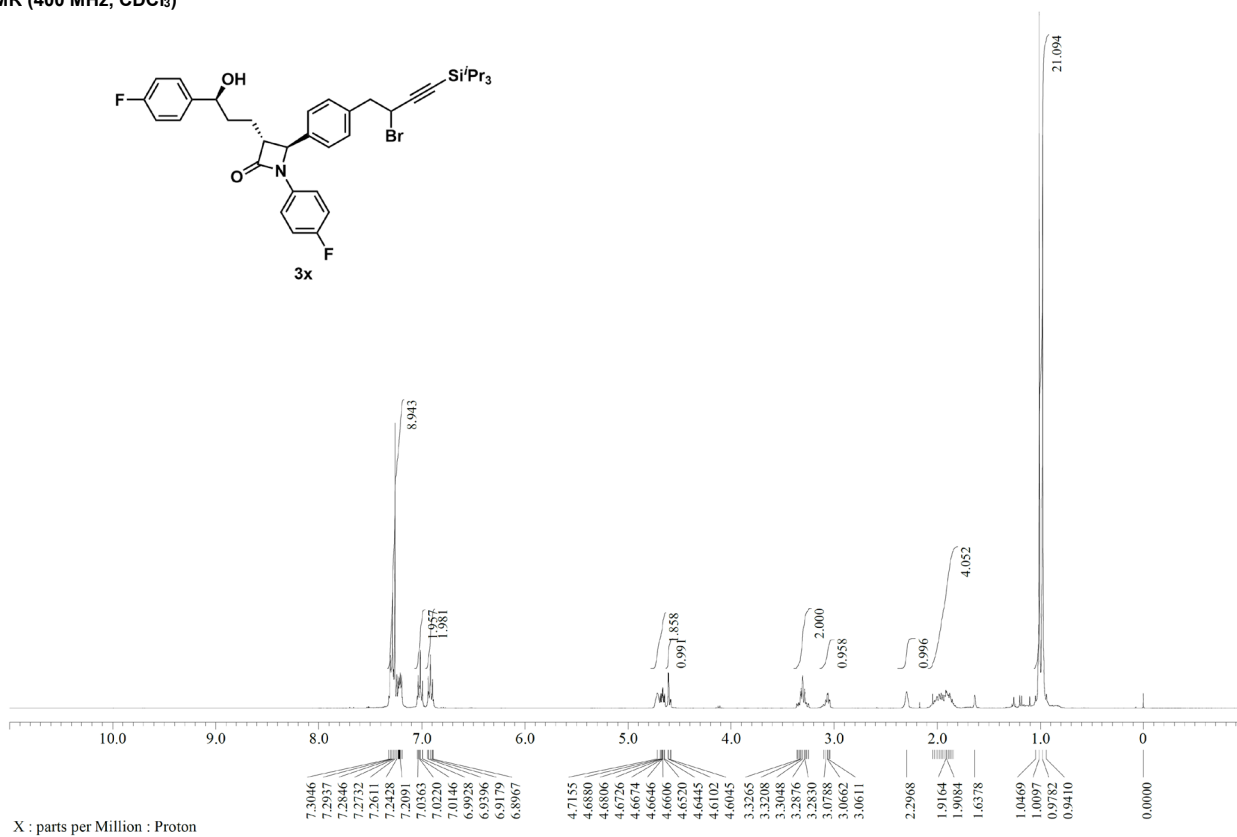



<sup>13</sup>C NMR (101 MHz, CDCl<sub>3</sub>)

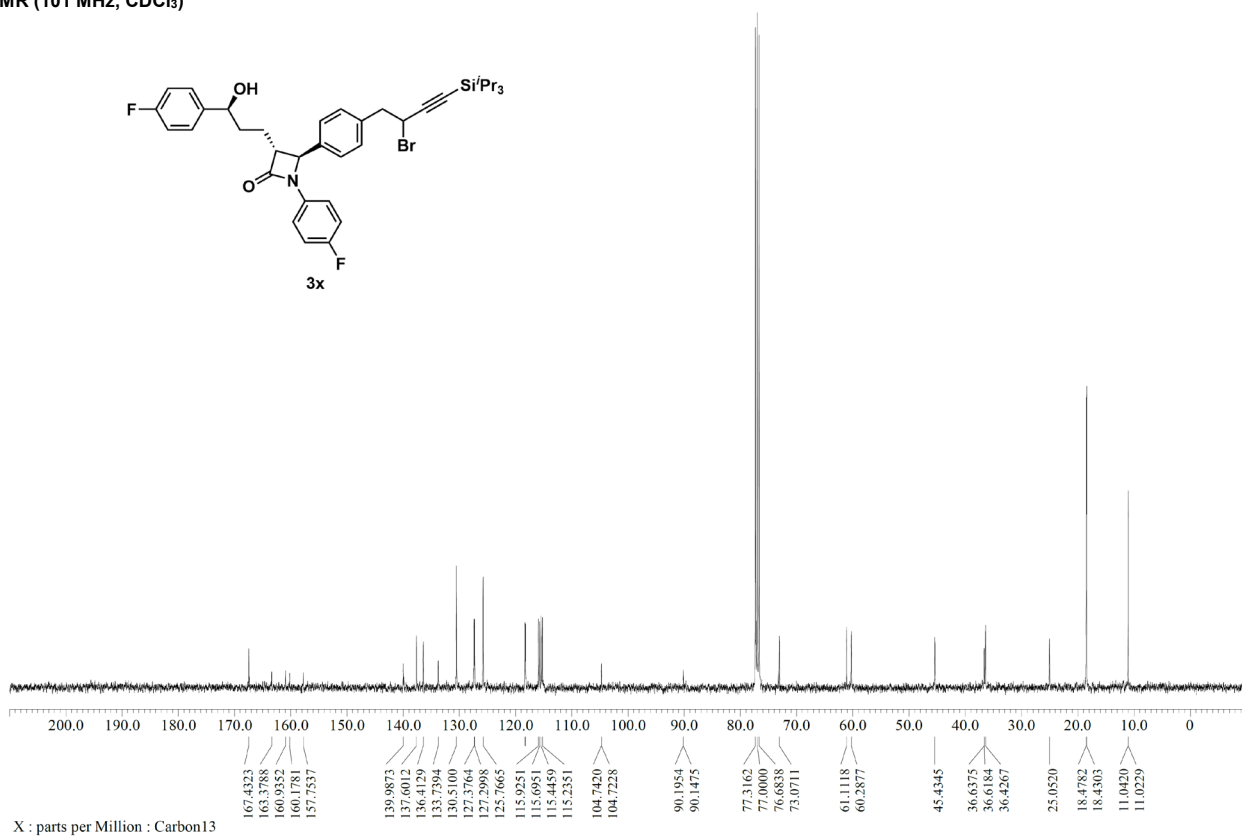

<sup>19</sup>F NMR (376 MHz, CDCl<sub>3</sub>)

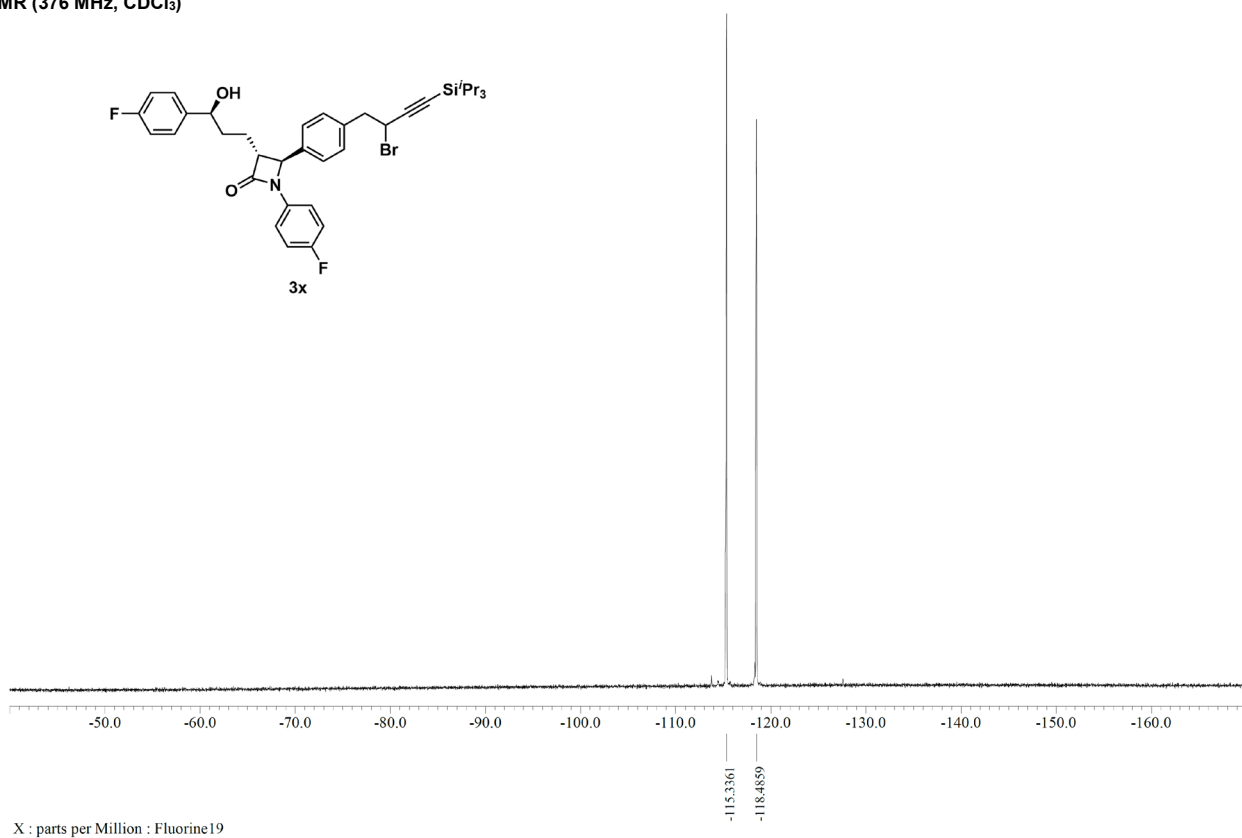

<sup>1</sup>H NMR (400 MHz, CDCl<sub>3</sub>)

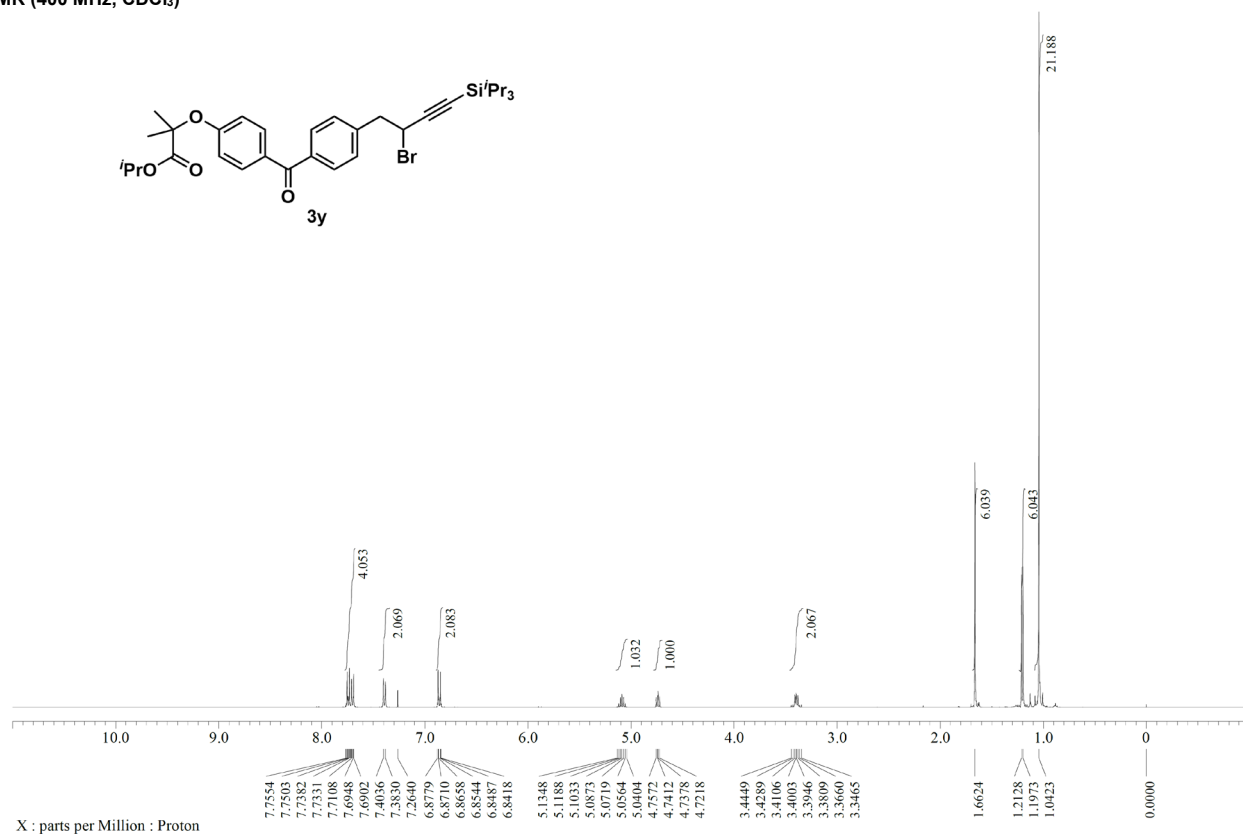

<sup>13</sup>C NMR (101 MHz, CDCl<sub>3</sub>)

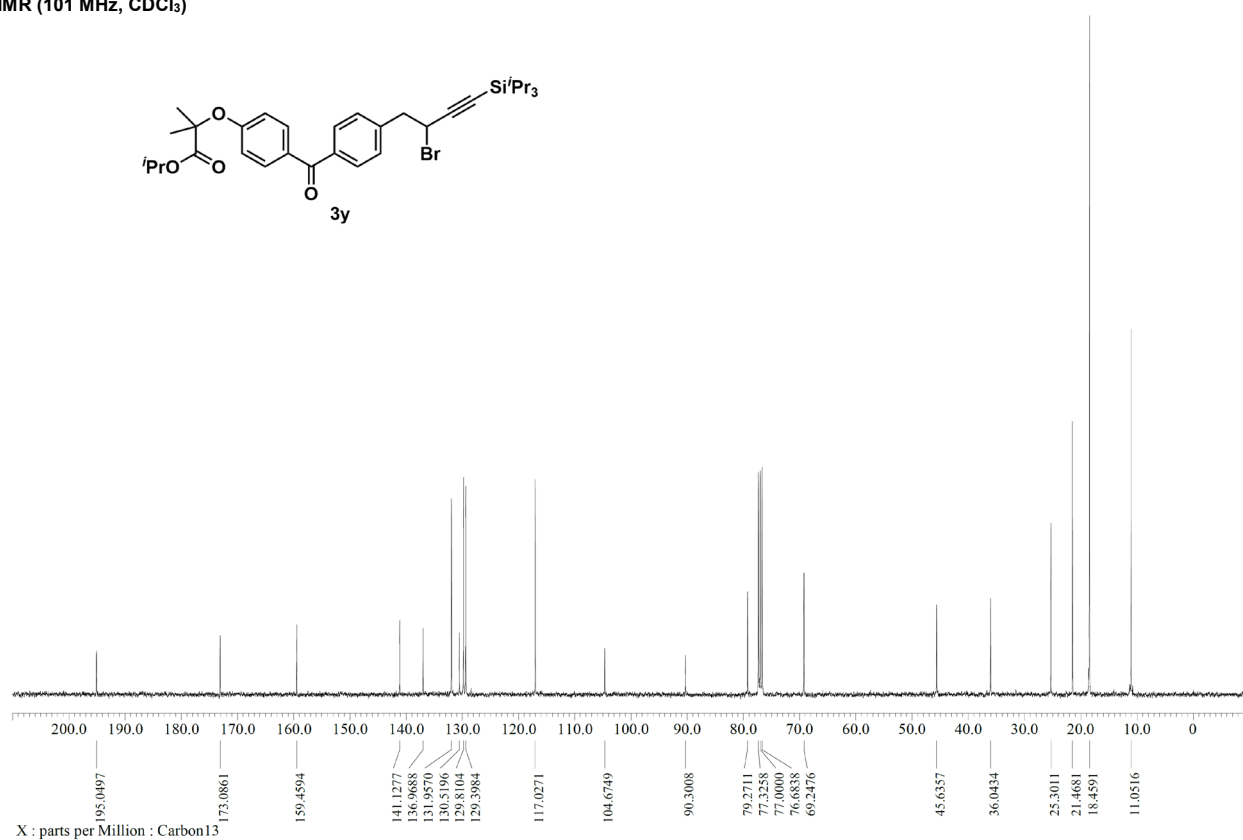

<sup>1</sup>H NMR (400 MHz, CDCl<sub>3</sub>)

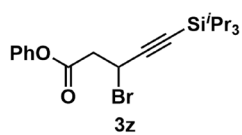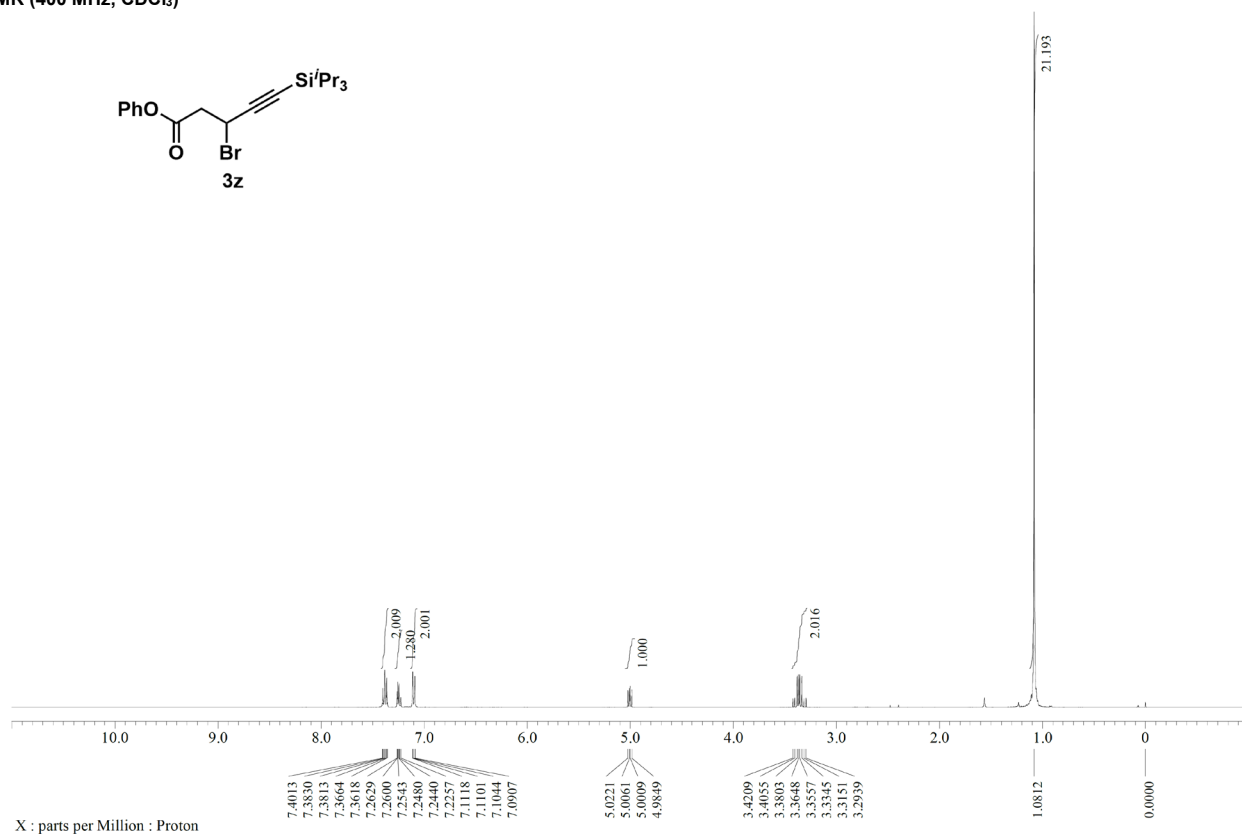

<sup>13</sup>C NMR (101 MHz, CDCl<sub>3</sub>)

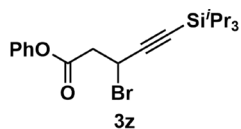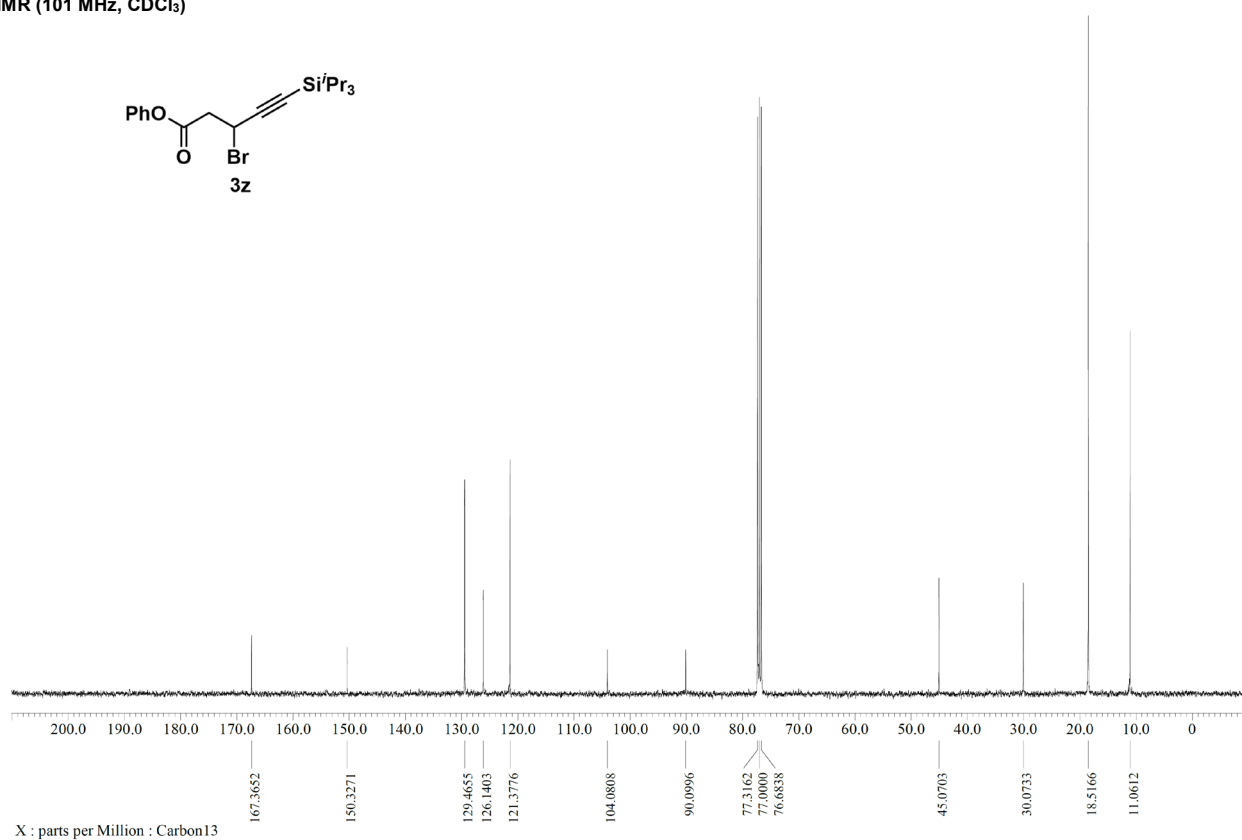

<sup>1</sup>H NMR (400 MHz, CDCl<sub>3</sub>)

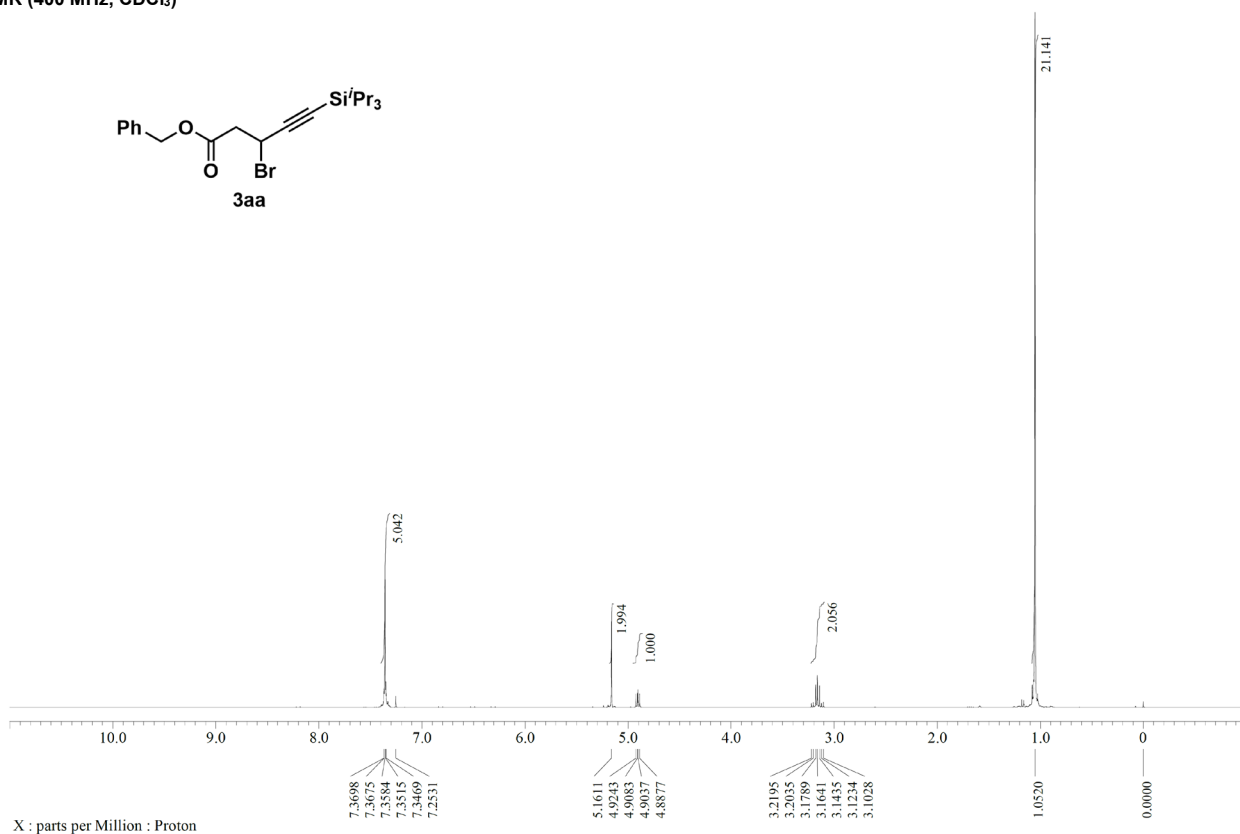

<sup>13</sup>C NMR (101 MHz, CDCl<sub>3</sub>)

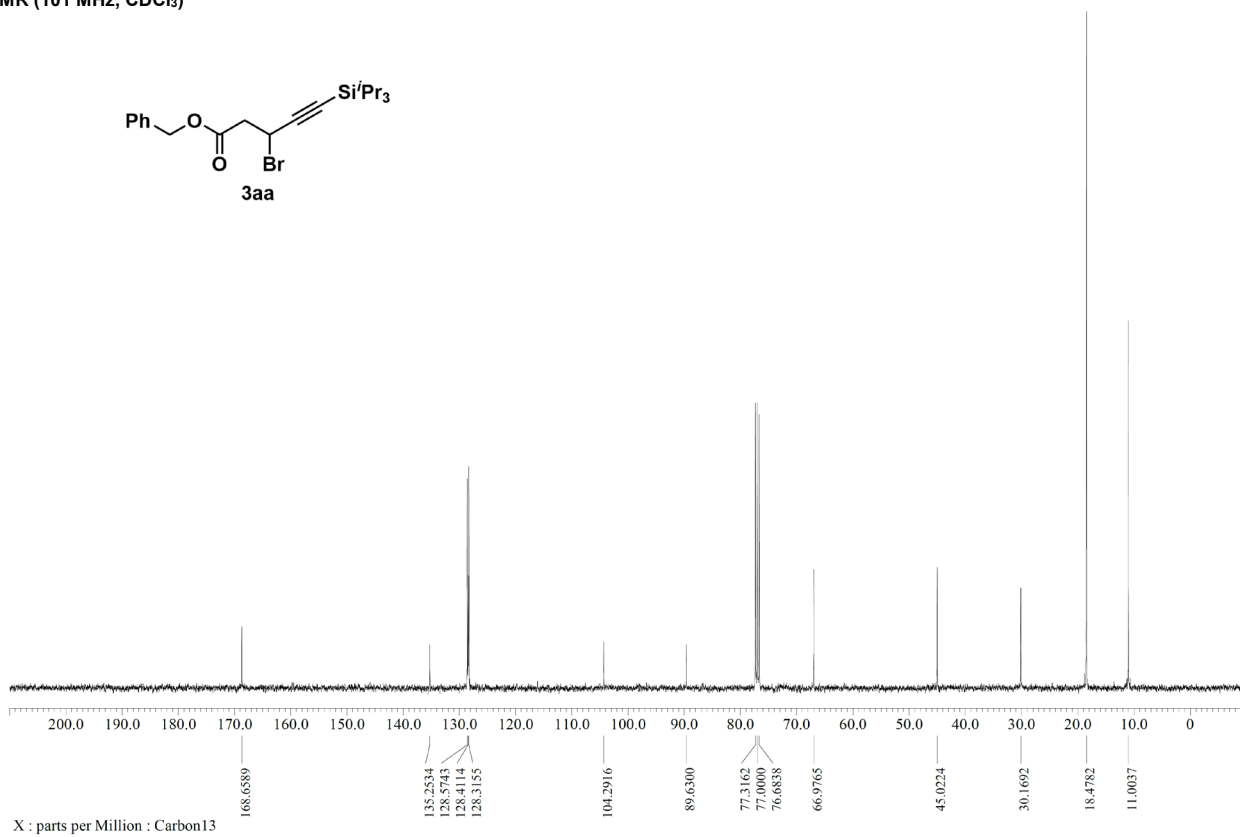

<sup>1</sup>H NMR (400 MHz, CDCl<sub>3</sub>)

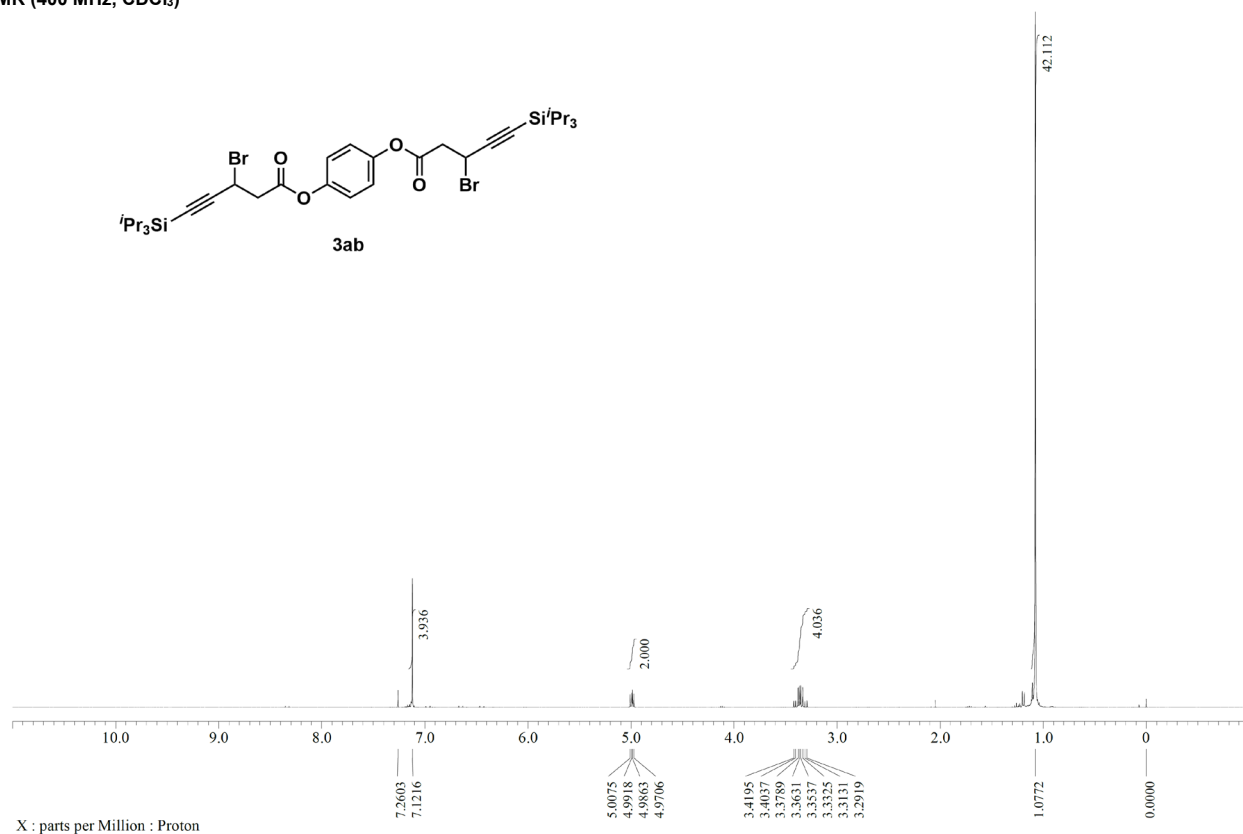

<sup>13</sup>C NMR (101 MHz, CDCl<sub>3</sub>)

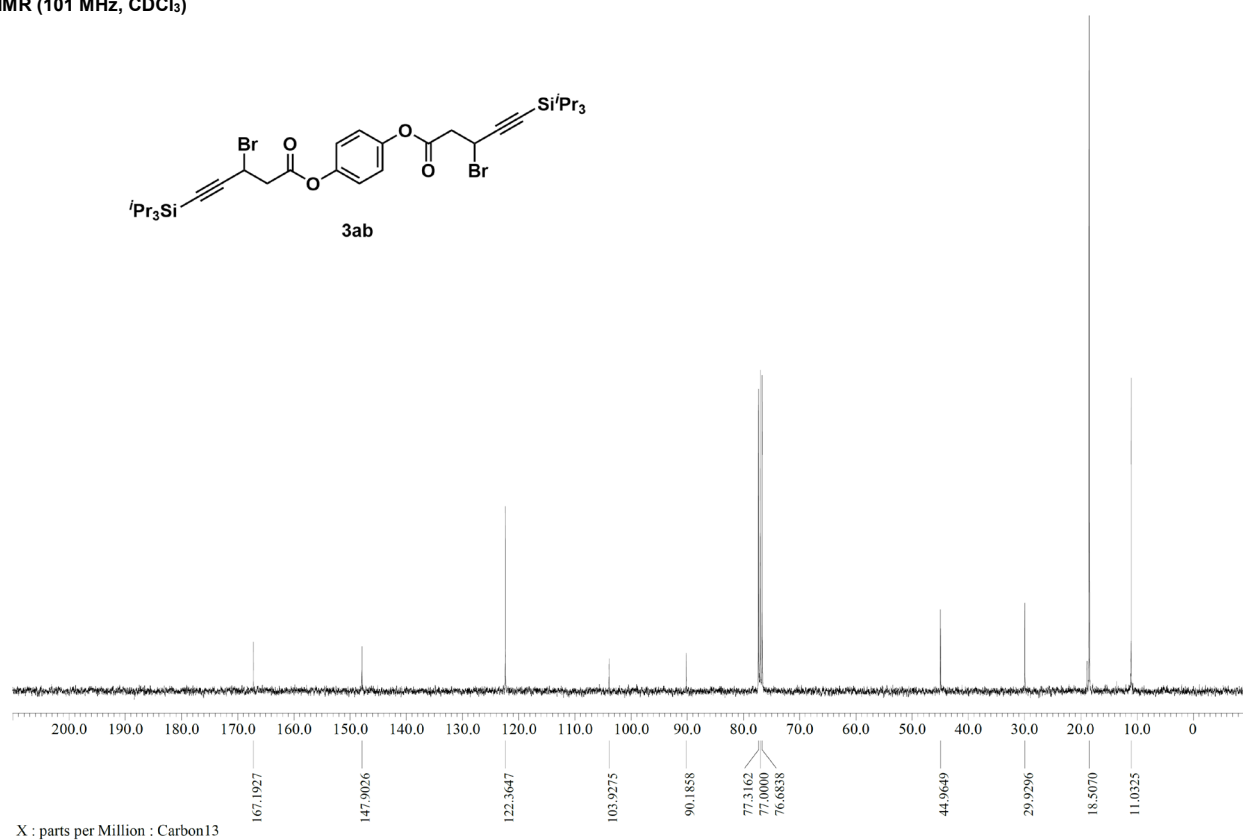

<sup>1</sup>H NMR (400 MHz, CDCl<sub>3</sub>)

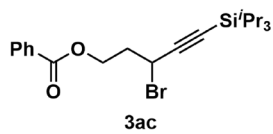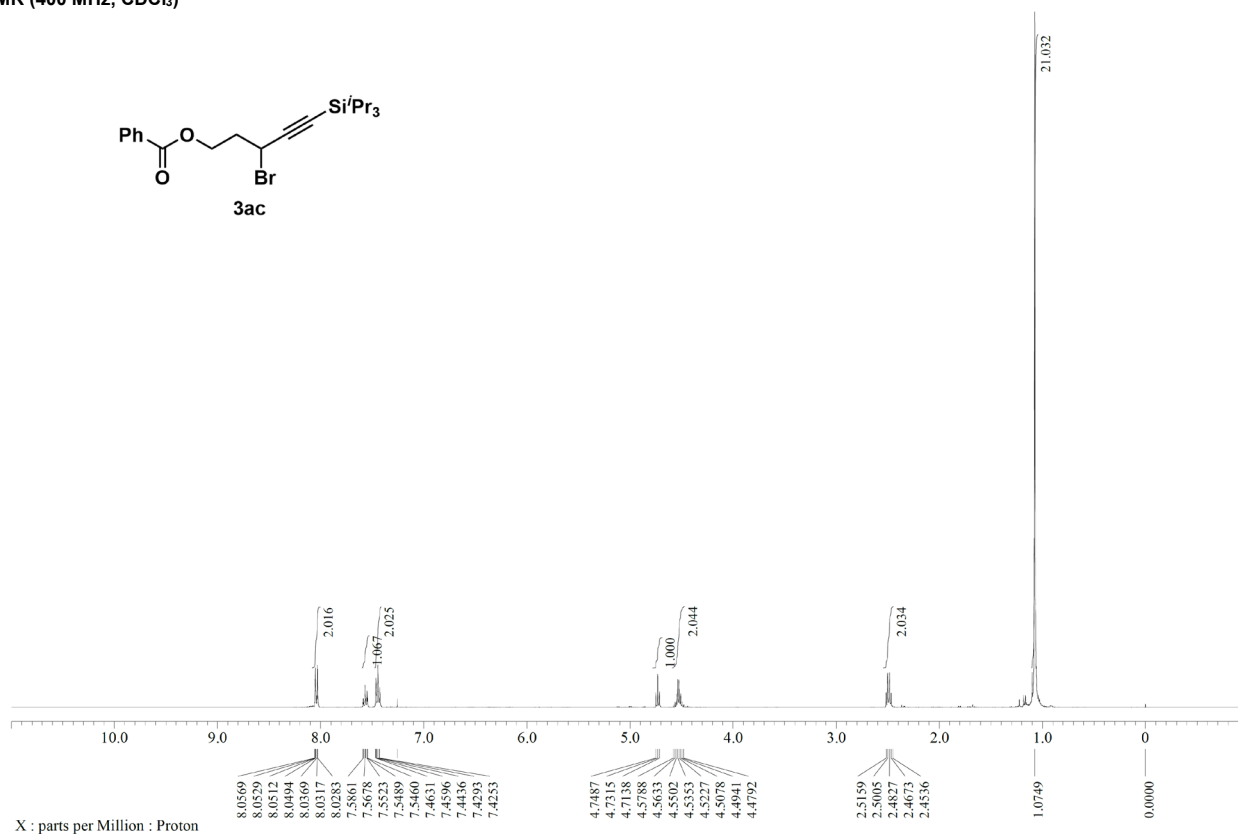

<sup>13</sup>C NMR (101 MHz, CDCl<sub>3</sub>)

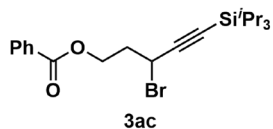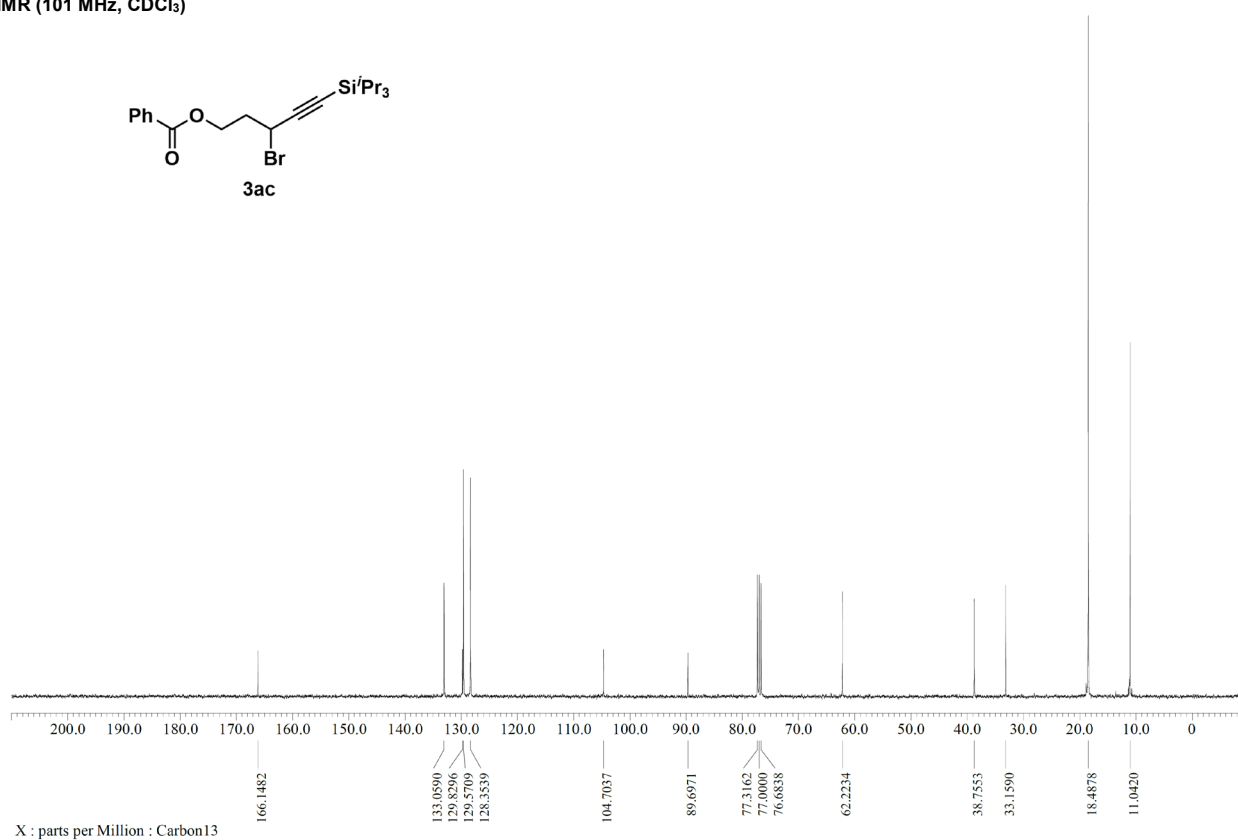

<sup>1</sup>H NMR (400 MHz, CDCl<sub>3</sub>)

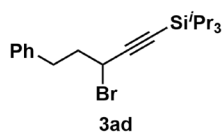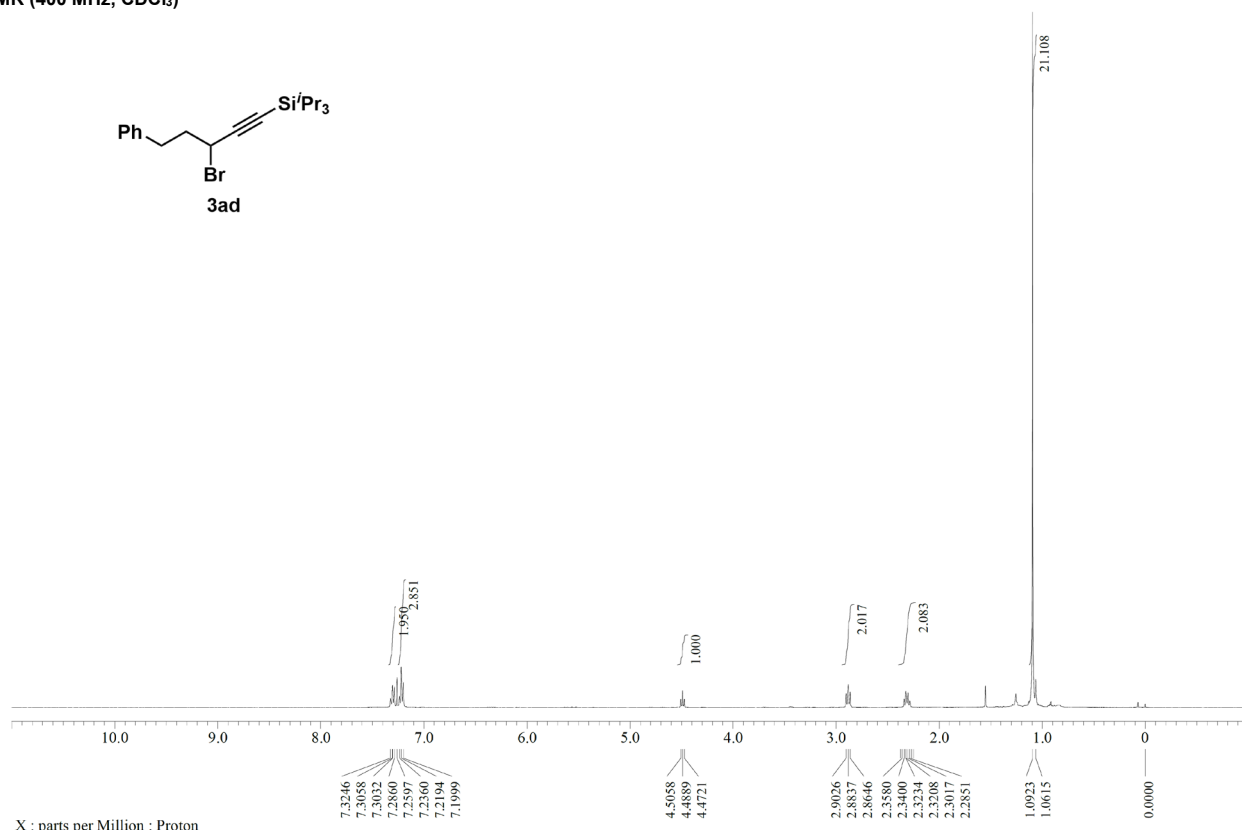

<sup>13</sup>C NMR (101 MHz, CDCl<sub>3</sub>)

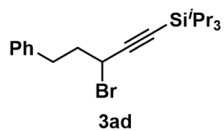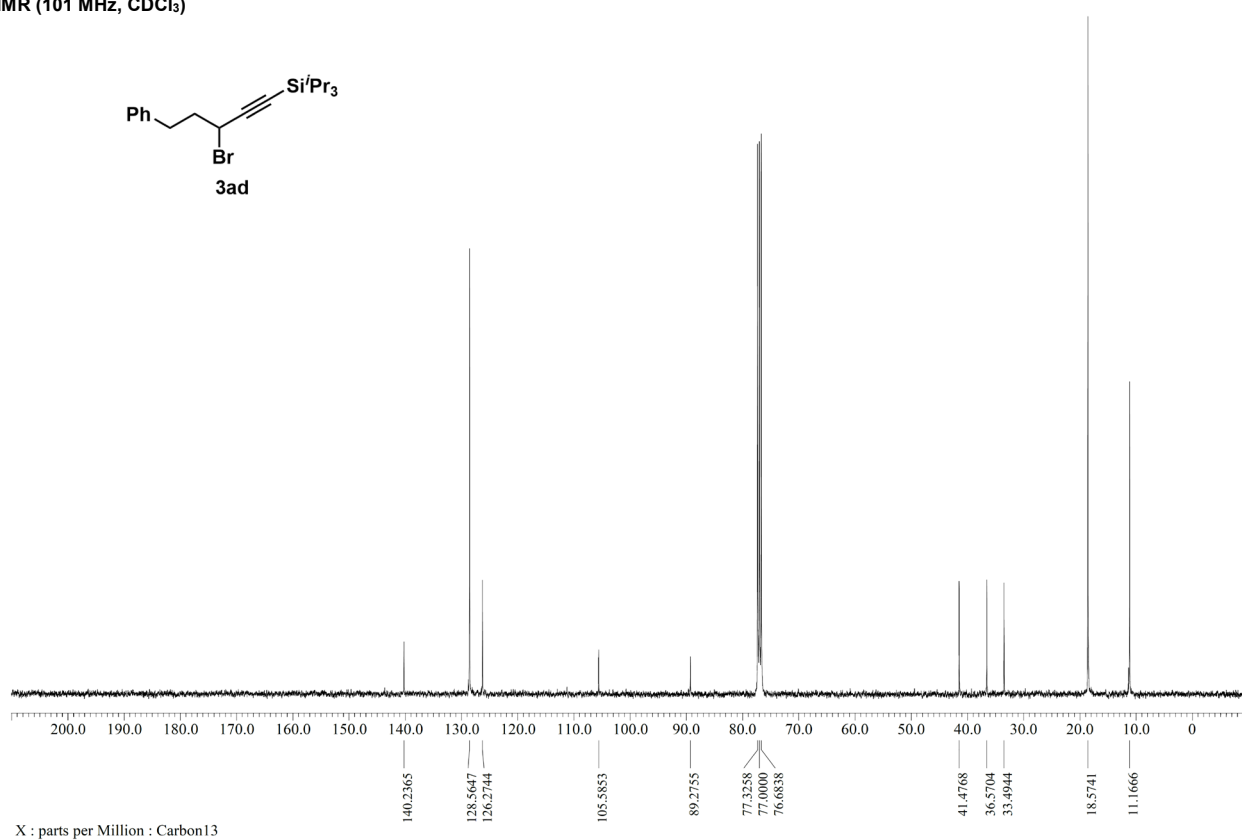

<sup>1</sup>H NMR (400 MHz, CDCl<sub>3</sub>)

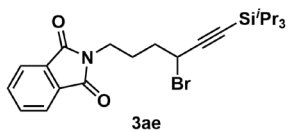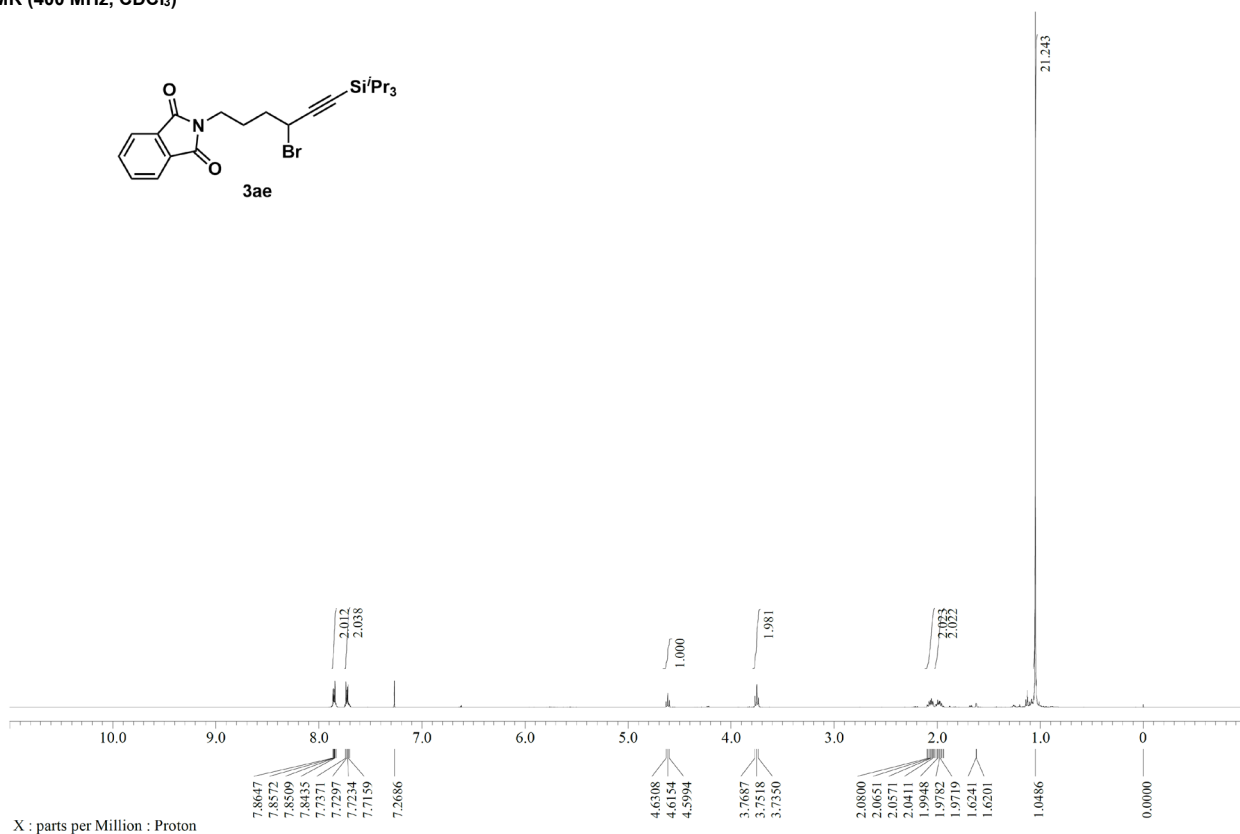

<sup>13</sup>C NMR (101 MHz, CDCl<sub>3</sub>)

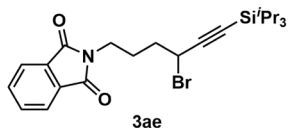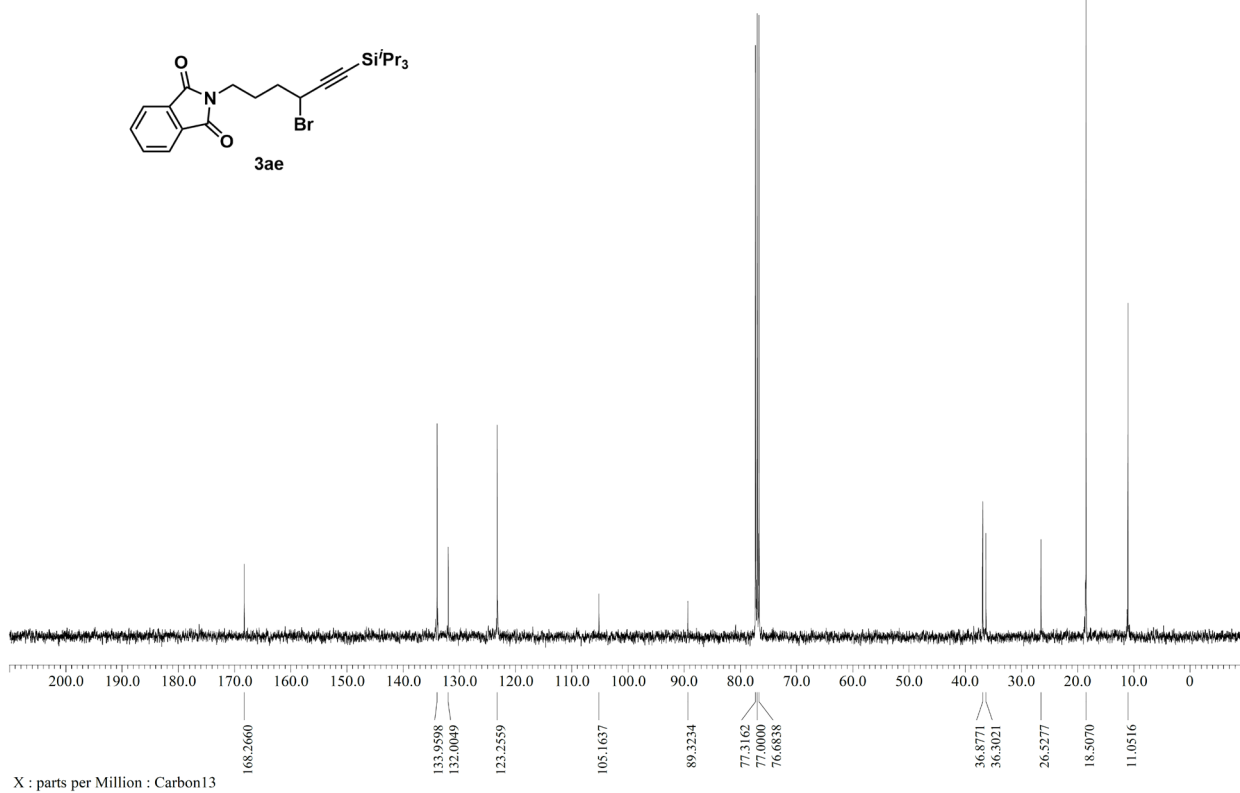



<sup>1</sup>H NMR (400 MHz, CDCl<sub>3</sub>)

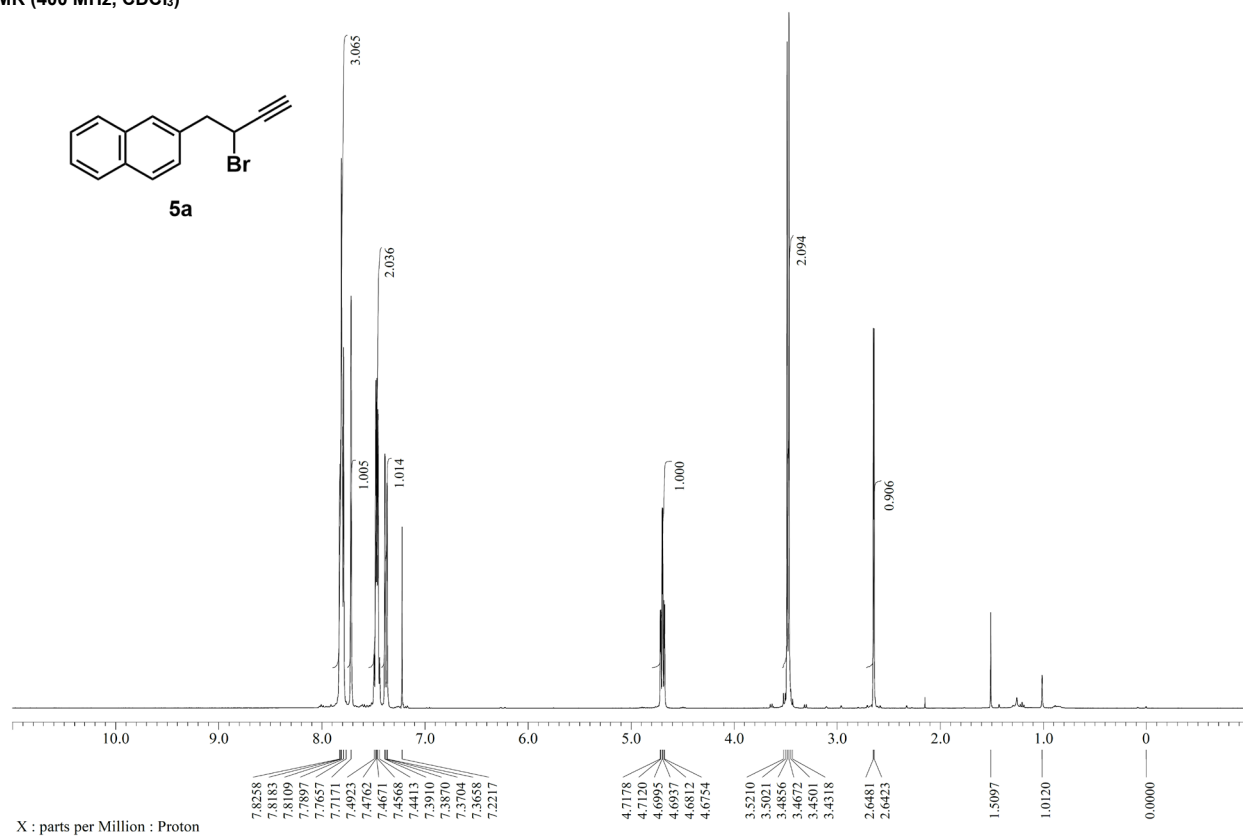

<sup>13</sup>C NMR (101 MHz, CDCl<sub>3</sub>)

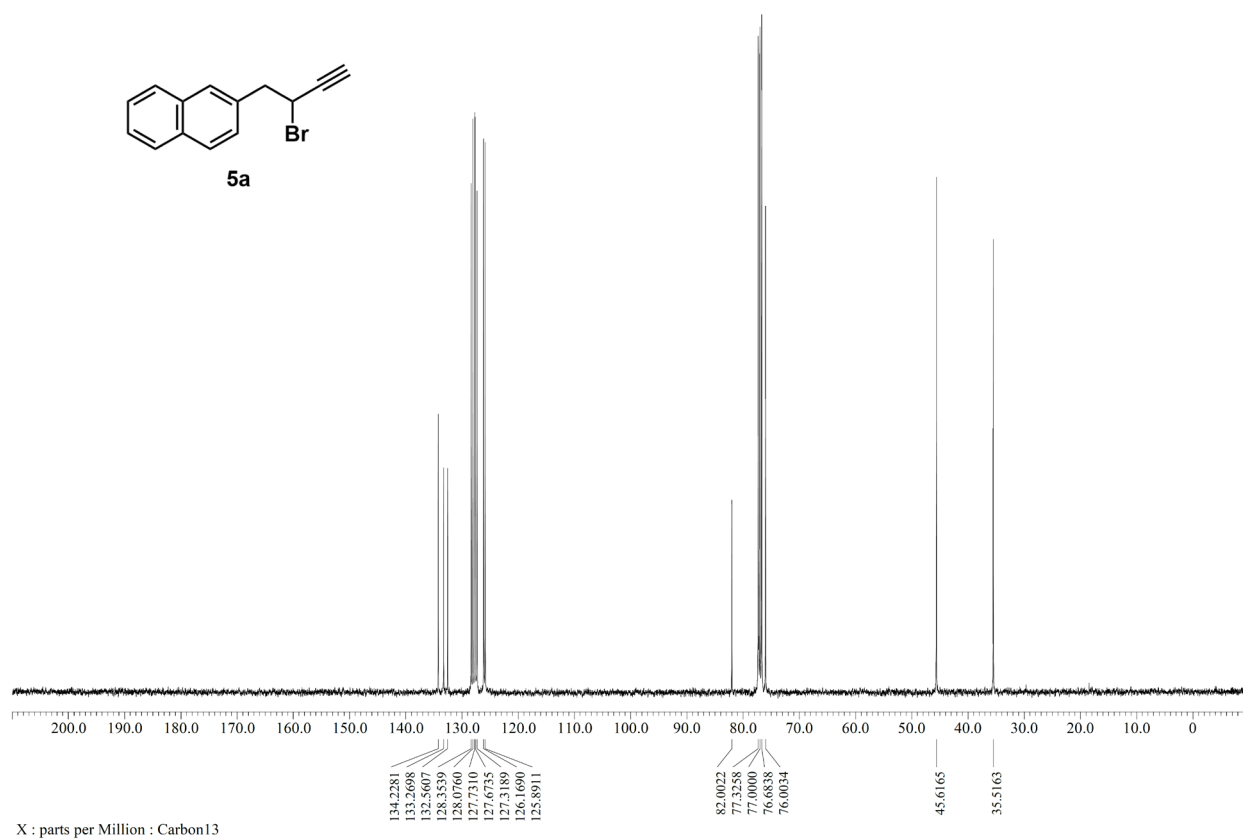

Supplement: d1sc02873a1.pdf [file d1sc02873a1.pdf]
